# Supplementary material for: Molecular Mechanisms of PD-1 and PD-L1 Activity on a Pan-Cancer Basis: A Bioinformatic Exploratory Study
Source: Int J Mol Sci. 2021 May 22;22(11):5478. doi: 10.3390/ijms22115478 (PMC8196980; doi:10.3390/ijms22115478)
Supplement: Supplementary file 1 [file ijms-22-05478-s001.zip]

Archive with 6 entries (6 files):
- File S1.xlsx
- File S2.xlsx
- File S3.xlsx
- File S4.xlsx
- File S5.xlsx
- Supplementary Figures.pdf
