# Supplementary material for: Molecular Mechanisms of PD-1 and PD-L1 Activity on a Pan-Cancer Basis: A Bioinformatic Exploratory Study
Source: Int J Mol Sci. 2021 May 22;22(11):5478. doi: 10.3390/ijms22115478 (PMC8196980; doi:10.3390/ijms22115478)
Supplement: Supplementary file 1 [file ijms-22-05478-s001.zip › File S1.xlsx]

## Sheet: Cervical
Cervical Squamous Cell Carcinoma and Endocervical Adenocarcinoma (TCGA, Firehose Legacy)	190 Patients/Samples				One Study, No Negative Correlations <-0.6
Correlated Gene	Cytoband	Spearman's Correlation	p-Value	q-Value	Number
PDCD1LG2	9p24.1	0.775295	2.27153e-39	4.54556e-35	1
RIC1	9p24.1	0.720836	9.43278e-32	9.43797e-28	1
GBP1	1p22.2	0.716865	2.87973e-31	1.92088e-27	1
JAK2	9p24.1	0.686851	7.42584e-28	3.71496e-24	1
GBP4	1p22.2	0.683334	1.75236e-27	7.01329e-24	1
GBP1P1	1p22.2	0.679649	4.25391e-27	1.41875e-23	1
GBP5	1p22.2	0.674147	1.56124e-26	4.46313e-23	1
TRIM22	11p15.4	0.666598	8.88712e-26	2.223e-22	1
OAS3	12q24.13	0.663992	1.60068e-25	3.55903e-22	1
TNFRSF9	1p36.23	0.660466	3.51735e-25	7.03856e-22	1
SAMD9L	7q21.2	0.653602	1.57973e-24	2.87381e-21	1
STX11	6q24.2	0.646787	6.75701e-24	1.12679e-20	1
CD80	3q13.33	0.641092	2.21327e-23	3.4069e-20	1
STAT1	2q32.2	0.636944	5.17122e-23	7.39153e-20	1
TAP2	6p21.32	0.635588	6.80532e-23	9.07874e-20	1
TAGAP	6q25.3	0.634178	9.04162e-23	1.13082e-19	1
AIM2	1q23.1-q23.2	0.633329	1.072e-22	1.26186e-19	1
CXCL9	4q21.1	0.632297	1.31777e-22	1.465e-19	1
APOL6	22q12.3	0.63103	1.69585e-22	1.78609e-19	1
CXCL11	4q21.1	0.630502	1.88336e-22	1.8844e-19	1
SAMSN1	21q11.2	0.627101	3.68158e-22	3.4595e-19	1
CXCL10	4q21.1	0.626935	3.80336e-22	3.4595e-19	1
TAP1	6p21.32	0.620617	1.2917e-21	1.12383e-18	1
CASP1	11q22.3	0.620174	1.40577e-21	1.17212e-18	1
IFIH1	2q24.2	0.616607	2.76694e-21	2.21477e-18	1
PPP1R18	6p21.33	0.612411	6.06888e-21	4.67094e-18	1
PARP9	3q21.1	0.607894	1.39559e-20	1.03434e-17	1
LCP2	5q35.1	0.606589	1.77083e-20	1.23838e-17	1
DOCK2	5q35.1	0.606515	1.79467e-20	1.23838e-17	1
PTPRC	1q31.3-q32.1	0.604568	2.55482e-20	1.70415e-17	1
NLRC5	16q13	0.602152	3.94651e-20	2.54754e-17	1
IL2RB	22q12.3	0.600064	5.72957e-20	3.58295e-17	1

## Sheet: Liver
Liver Hepatocellular Carcinoma (TCGA, Firehose Legacy)	360 Patients/Samples				One Study, No Negative Correlations <-0.6
Correlated Gene	Cytoband	Spearman's Correlation	p-Value	q-Value	Number
JAK2	9p24.1	0.66619	1.56537e-47	3.14421e-43	1
CD84	1q23.3	0.64206	3.17772e-43	3.19139e-39	1
PTPRC	1q31.3-q32.1	0.605196	2.41294e-37	1.61554e-33	1

## Sheet: Ovarian
Ovarian Serous Cystadenocarcinoma (TCGA, Firehose Legacy)	182 Samples/Patients				One Study, No Negative Correlations <-0.6
Correlated Gene	Cytoband	Spearman's Correlation	p-Value	q-Value	Number
TRIM22	11p15.4	0.746748	1.045e-33	2.09659e-29	1
GBP4	1p22.2	0.740864	6.1427e-33	6.16205e-29	1
JAK2	9p24.1	0.734345	4.13639e-32	2.76628e-28	1
PDCD1LG2	9p24.1	0.720801	1.82694e-30	9.16347e-27	1
SAMD9L	7q21.2	0.713458	1.29915e-29	5.21297e-26	1
SP140	2q37.1	0.70454	1.29705e-28	4.33711e-25	1
PARP14	3q21.1	0.698974	5.22308e-28	1.49701e-24	1
LAG3	12p13.31	0.692754	2.38684e-27	5.98591e-24	1
CXCR2P1	2q35	0.690297	4.30347e-27	9.59339e-24	1
GBP1P1	1p22.2	0.688731	6.24822e-27	1.22381e-23	1
ETV7	6p21.31	0.68843	6.7098e-27	1.22381e-23	1
TNFSF13B	13q33.3	0.687773	7.83837e-27	1.31051e-23	1
ZBP1	20q13.31	0.685444	1.35571e-26	2.09228e-23	1
NLRC5	16q13	0.681467	3.41506e-26	4.89402e-23	1
CCR5	3p21.31	0.679482	5.38575e-26	7.20363e-23	1
CD38	4p15.32	0.678899	6.15312e-26	7.71562e-23	1
AIM2	1q23.1-q23.2	0.67311	2.27062e-25	2.67973e-22	1
GBP5	1p22.2	0.67075	3.834e-25	4.27342e-22	1
CTSS	1q21.3	0.66904	5.58696e-25	5.89954e-22	1
STX11	6q24.2	0.66782	7.29806e-25	7.32105e-22	1
SLFN12L	17q12	0.666226	1.03247e-24	9.86399e-22	1
CD80	3q13.33	0.663685	1.78763e-24	1.63024e-21	1
FASLG	1q24.3	0.663361	1.9167e-24	1.67194e-21	1
ICOS	2q33.2	0.659544	4.32401e-24	3.61469e-21	1
APOL3	22q12.3	0.659188	4.66173e-24	3.74113e-21	1
FPR3	19q13.41	0.658832	5.02602e-24	3.87835e-21	1
EPSTI1	13q14.11	0.657964	6.03439e-24	4.484e-21	1
STAT1	2q32.2	0.657256	7.00289e-24	5.01782e-21	1
TRANK1	3p22.2	0.656857	7.61234e-24	5.26643e-21	1
APOL6	22q12.3	0.654254	1.30975e-23	8.75917e-21	1
ITGAL	16p11.2	0.650259	2.98076e-23	1.92913e-20	1
TMEM140	7q33	0.649723	3.32498e-23	2.08466e-20	1
TBX21	17q21.32	0.645411	7.95362e-23	4.83556e-20	1
TAP1	6p21.32	0.645057	8.538e-23	4.99677e-20	1
MLKL	16q23.1	0.644954	8.71689e-23	4.99677e-20	1
HLA-F	6p22.1	0.643841	1.08881e-22	6.06798e-20	1
XAF1	17p13.1	0.642625	1.38698e-22	7.5208e-20	1
GVINP1	11p15.4	0.640027	2.31744e-22	1.20909e-19	1
SLA2	20q11.23	0.639955	2.35033e-22	1.20909e-19	1
SLAMF1	1q23.3	0.639444	2.59868e-22	1.30343e-19	1
IL2RB	22q12.3	0.633613	8.06099e-22	3.94457e-19	1
LCP2	5q35.1	0.632763	9.48823e-22	4.53244e-19	1
ITK	5q33.3	0.631041	1.31823e-21	6.15064e-19	1
TIGIT	3q13.31	0.627912	2.38303e-21	1.08661e-18	1
HLA-E	6p22.1	0.627769	2.44783e-21	1.09135e-18	1
CXCL10	4q21.1	0.62626	3.2484e-21	1.4168e-18	1
LTA	6p21.33	0.625094	4.03845e-21	1.7239e-18	1
PTPRC	1q31.3-q32.1	0.623981	4.96631e-21	2.07581e-18	1
PRF1	10q22.1	0.623601	5.32894e-21	2.18193e-18	1
DOCK8	9p24.3	0.623043	5.90791e-21	2.37061e-18	1
CD2	1p13.1	0.620679	9.13039e-21	3.59182e-18	1
TAP2	6p21.32	0.620468	9.4903e-21	3.66161e-18	1
CTLA4	2q33.2	0.619137	1.21019e-20	4.51702e-18	1
CXCR6	3p21.31	0.619112	1.21577e-20	4.51702e-18	1
CCR1	3p21.31	0.618825	1.28094e-20	4.67265e-18	1
CXCL11	4q21.1	0.618425	1.37768e-20	4.93577e-18	1
SLAMF6	1q23.2-q23.3	0.616875	1.82499e-20	6.42363e-18	1
HCG26	6p21.33	0.616104	2.09736e-20	7.25506e-18	1
SAMD3	6q23.1	0.61593	2.16414e-20	7.35918e-18	1
PTPN22	1p13.2	0.615539	2.32221e-20	7.75883e-18	1
IL12RB1	19p13.11	0.615375	2.39172e-20	7.75883e-18	1
PARP15	3q21.1	0.615361	2.39768e-20	7.75883e-18	1
HCP5	6p21.33	0.614512	2.79276e-20	8.89384e-18	1
PIK3AP1	10q24.1	0.613238	3.50766e-20	1.0996e-17	1
TFEC	7q31.2	0.612933	3.70351e-20	1.14313e-17	1
PYHIN1	1q23.1	0.612838	3.76676e-20	1.14504e-17	1
RASGRP3	2p22.3	0.612016	4.36073e-20	1.30581e-17	1
CD86	3q13.33	0.611707	4.60639e-20	1.35909e-17	1
TYMP	22q13.33	0.611552	4.73509e-20	1.37681e-17	1
TMEM150B	19q13.42	0.611286	4.96333e-20	1.42256e-17	1
OAS2	12q24.13	0.6107	5.50657e-20	1.55603e-17	1
ADAMDEC1	8p21.2	0.609324	7.01937e-20	1.95597e-17	1
IFIH1	2q24.2	0.609229	7.13842e-20	1.96189e-17	1
SLAMF8	1q23.2	0.608407	8.24789e-20	2.23618e-17	1
GFI1	1p22.1	0.60713	1.03137e-19	2.75898e-17	1
BATF2	11q13.1	0.607029	1.04969e-19	2.77104e-17	1
STAT4	2q32.2-q32.3	0.606589	1.13344e-19	2.95327e-17	1
TAGAP	6q25.3	0.606034	1.24856e-19	3.21152e-17	1
THEMIS	6q22.33	0.605411	1.39136e-19	3.53352e-17	1
TESPA1	12q13.2	0.605233	1.43502e-19	3.59884e-17	1
SAMSN1	21q11.2	0.605076	1.4745e-19	3.65221e-17	1
GIMAP8	7q36.1	0.603603	1.90241e-19	4.65463e-17	1
IL18RAP	2q12.1	0.603381	1.97686e-19	4.77853e-17	1
CD226	18q22.2	0.603128	2.0649e-19	4.93191e-17	1
IFIT3	10q23.31	0.602678	2.23124e-19	5.26652e-17	1
TRAF3IP3	1q32.2	0.602413	2.33513e-19	5.44764e-17	1
GIMAP7	7q36.1	0.601125	2.91202e-19	6.71539e-17	1

## Sheet: Esophageal
Esophageal Carcinoma (TCGA, Firehose Legacy)	183 Patients/Samples				One Study, No Negative Correlations <-0.6
Correlated Gene	Cytoband	Spearman's Correlation	p-Value	q-Value	Number
PDCD1LG2	9p24.1	0.692161	1.98166e-27	4.00533e-23	1
STX11	6q24.2	0.624621	3.43428e-21	3.47068e-17	1
GBP5	1p22.2	0.614127	2.35477e-20	1.58648e-16	1

## Sheet: Pancreatic
Pancreatic Adenocarcinoma (TCGA, Firehose Legacy)	149 Patients/Samples				One Study, Positive and Negative Available
Correlated Gene	Cytoband	Spearman's Correlation	p-Value	q-Value	Number
NR3C1	5q31.3	0.692743	1.2784e-22	2.54683e-18	1
PDCD1LG2	9p24.1	0.685266	5.46276e-22	5.44145e-18	1
RIC1	9p24.1	0.674439	4.14985e-21	2.09033e-17	1
HIVEP2	6q24.2	0.674378	4.19702e-21	2.09033e-17	1
XRN1	3q23	0.660487	5.00338e-20	1.99355e-16	1
CD226	18q22.2	0.653728	1.59441e-19	5.29396e-16	1
MARCH1	4q32.2-q32.3	0.652324	2.02094e-19	5.7516e-16	1
BMP2K	4q21.21	0.651154	2.46e-19	6.12602e-16	1
RNF213	17q25.3	0.650091	2.93889e-19	6.50539e-16	1
OSBPL8	12q21.2	0.644639	7.23859e-19	1.44207e-15	1
CD84	1q23.3	0.642511	1.02394e-18	1.85445e-15	1
RFX3	9p24.2	0.641898	1.13099e-18	1.87762e-15	1
DPYD	1p21.3	0.639525	1.65823e-18	2.33707e-15	1
ATP10D	4p12	0.639393	1.69386e-18	2.33707e-15	1
ITGA4	2q31.3	0.63913	1.76686e-18	2.33707e-15	1
PLXNC1	12q22	0.637955	2.13246e-18	2.49899e-15	1
GPR141	7p14.1	0.635494	3.15306e-18	3.48973e-15	1
LIMS1	2q12.3	0.633617	4.23866e-18	4.44435e-15	1
ATF7IP	12p13.1	0.631394	6.00326e-18	5.97985e-15	1
ATP11C	Xq27.1	0.628894	8.8478e-18	8.39361e-15	1
MPHOSPH9	12q24.31	0.628192	9.85981e-18	8.92851e-15	1
CD80	3q13.33	0.626808	1.21969e-17	1.05647e-14	1
FYB1	5p13.1	0.625914	1.39861e-17	1.16096e-14	1
P2RX7	12q24.31	0.625152	1.57104e-17	1.22391e-14	1
DSE	6q22.1	0.625043	1.59731e-17	1.22391e-14	1
SLC8A1	2p22.1	0.623786	1.93361e-17	1.42672e-14	1
CEP170	1q43	0.622068	2.50701e-17	1.72553e-14	1
KIAA2026	9p24.1	0.622056	2.51181e-17	1.72553e-14	1
GBP5	1p22.2	0.620973	2.95618e-17	1.9631e-14	1
OSBPL11	3q21.2	0.618285	4.41738e-17	2.83881e-14	1
BICC1	10q21.1	0.617829	4.72653e-17	2.94256e-14	1
MAML2	11q21	0.616783	5.51945e-17	3.26546e-14	1
IL6ST	5q11.2	0.616717	5.57301e-17	3.26546e-14	1
STAG1	3q22.3	0.61447	7.75964e-17	4.41679e-14	1
SNX29	16p13.13-p13.12	0.61373	8.64825e-17	4.78585e-14	1
FAM168A	11q13.4	0.612146	1.0896e-16	5.86675e-14	1
PJA2	5q21.3	0.611633	1.17401e-16	6.01513e-14	1
MAP3K2	2q14.3	0.611526	1.1924e-16	6.01513e-14	1
SAMHD1	20q11.23	0.611161	1.25717e-16	6.01513e-14	1
WDR7	18q21.31	0.611103	1.26779e-16	6.01513e-14	1
CTSO	4q32.1	0.611102	1.26812e-16	6.01513e-14	1
GPRIN3	4q22.1	0.610828	1.31946e-16	6.11308e-14	1
SLFN5	17q12	0.610423	1.399e-16	6.33429e-14	1
ASAP1	8q24.21-q24.22	0.60891	1.74009e-16	7.70357e-14	1
HIPK3	11p13	0.608595	1.82086e-16	7.82954e-14	1
TTBK2	15q15.2	0.608495	1.84715e-16	7.82954e-14	1
CHM	Xq21.2	0.608237	1.91673e-16	7.95522e-14	1
NRP1	10p11.22	0.607757	2.05349e-16	8.34889e-14	1
PIK3CG	7q22.3	0.607541	2.11795e-16	8.43877e-14	1
CEP97	3q12.3	0.606485	2.46278e-16	9.62028e-14	1
QKI	6q26	0.605865	2.69034e-16	1.02466e-13	1
CCSER2	10q23.1	0.605772	2.72598e-16	1.02466e-13	1
LEPROT	1p31.3	0.605575	2.80372e-16	1.03436e-13	1
IL7R	5p13.2	0.605292	2.91875e-16	1.05722e-13	1
LATS1	6q25.1	0.603358	3.83758e-16	1.36522e-13	1
PXK	3p14.3	0.603035	4.0163e-16	1.37148e-13	1
ELK3	12q23.1	0.602955	4.06172e-16	1.37148e-13	1
TRIM44	11p13	0.601943	4.68297e-16	1.5549e-13	1
KRTCAP2	1q22	-0.600106	6.05589e-16	1.97779e-13	1
PHKG2	16p11.2	-0.603046	4.01015e-16	1.37148e-13	1
JTB	1q21.3	-0.638753	1.87698e-18	2.33707e-15	1

## Sheet: Gastric
Stomach Adenocarcinoma (TCGA, Firehose Legacy)	369 Patients/Samples					Stomach Adenocarcinoma (TCGA, Nature 2014)	258 Patients/Samples
Correlated Gene	Cytoband	Spearman's Correlation	p-Value	q-Value		Correlated Gene	Cytoband	Spearman's Correlation	p-Value	q-Value		Positive Correlation Gene	Study 1	Study 2	Average	Number of Studies
GBP5	1p22.2	0.726664	8.28783e-62	1.67572e-57		GBP1	1p22.2	0.806772	1.95182e-60	4.42166e-56		GBP5	0.726664	0.794729	0.760697	2
GBP1	1p22.2	0.709023	1.24388e-57	1.2575e-53		GBP5	1p22.2	0.794729	1.93173e-57	2.18808e-53		GBP1	0.709023	0.806772	0.757897	2
WARS	14q32.2	0.695312	1.35077e-54	9.10375e-51		IFNG	12q15	0.7813	2.50373e-54	1.89065e-50		WARS	0.695312	0.771895	0.733604	2
CD80	3q13.33	0.688461	3.83907e-53	1.94055e-49		IDO1	8p11.21	0.776002	3.68535e-53	2.0872e-49		CD80	0.688461	0.745098	0.71678	2
IDO1	8p11.21	0.686511	9.78684e-53	3.9576e-49		WARS	14q32.2	0.771895	2.81842e-52	1.27697e-48		IDO1	0.686511	0.776002	0.731256	2
PDCD1LG2	9p24.1	0.683572	3.95432e-52	1.33254e-48		CXCL10	4q21.1	0.762367	2.69359e-50	1.01701e-46		PDCD1LG2	0.683572	0.71117	0.697371	2
GBP4	1p22.2	0.677733	6.04248e-51	1.74533e-47		CD80	3q13.33	0.745098	6.20243e-47	2.00728e-43		GBP4	0.677733	0.736919	0.707326	2
IFNG	12q15	0.669931	2.09397e-49	5.29225e-46		STAT1	2q32.2	0.74177	2.567e-46	7.26912e-43		IFNG	0.669931	0.7813	0.725615	2
LAP3	4p15.32	0.665739	1.34658e-48	3.02517e-45		GBP4	1p22.2	0.736919	1.95794e-45	4.92834e-42		LAP3	0.665739	0.70744	0.686589	2
IL2RA	10p15.1	0.661238	9.60383e-48	1.9418e-44		CXCL9	4q21.1	0.732894	1.02133e-44	2.31371e-41		IL2RA	0.661238	0.692492	0.676865	2
IL2RB	22q12.3	0.645132	8.28034e-45	1.522e-41		PDCD1LG2	9p24.1	0.71117	4.65133e-41	9.57921e-38		IL2RB	0.645132	0.660954	0.653043	2
TLR8	Xp22.2	0.644494	1.07335e-44	1.8085e-41		LAP3	4p15.32	0.70744	1.82718e-40	3.4494e-37		TLR8	0.644494	0.660997	0.652746	2
PRF1	10q22.1	0.639634	7.59032e-44	1.18053e-40		CCL4	17q12	0.706334	2.73028e-40	4.75783e-37		PRF1	0.639634	0.638469	0.639052	2
SLAMF8	1q23.2	0.638249	1.31701e-43	1.90204e-40		LCP2	5q35.1	0.704812	4.73012e-40	7.65401e-37		SLAMF8	0.638249	0.690353	0.664301	2
ICAM1	19p13.2	0.636762	2.37188e-43	3.19713e-40		GZMB	14q12	0.699816	2.80389e-39	4.23462e-36		ICAM1	0.636762	0.641724	0.639243	2
PLEK	2p14	0.633361	9.00094e-43	1.13744e-39		ICOS	2q33.2	0.69916	3.53156e-39	5.00025e-36		PLEK	0.633361	0.677243	0.655302	2
CCL4	17q12	0.629058	4.75238e-42	5.65225e-39		IL2RA	10p15.1	0.692492	3.56623e-38	4.72134e-35		CCL4	0.629058	0.706334	0.667696	2
LCP2	5q35.1	0.628726	5.39742e-42	6.06281e-39		CTLA4	2q33.2	0.692344	3.75139e-38	4.72134e-35		LCP2	0.628726	0.704812	0.666769	2
STAT1	2q32.2	0.627849	7.54829e-42	8.03257e-39		SLAMF8	1q23.2	0.690353	7.38882e-38	8.80981e-35		STAT1	0.627849	0.74177	0.684809	2
CD226	18q22.2	0.625829	1.62813e-41	1.58112e-38		CXCL11	4q21.1	0.689703	9.20685e-38	1.04286e-34		CD226	0.625829	0.638219	0.632024	2
CXCL9	4q21.1	0.625806	1.6422e-41	1.58112e-38		C5ORF56	5q31.1	0.688985	1.17343e-37	1.26586e-34		CXCL9	0.625806	0.732894	0.67935	2
CXCL10	4q21.1	0.624321	2.87895e-41	2.64589e-38		VSIG8	1q23.2	0.682378	1.05732e-36	1.08875e-33		CXCL10	0.624321	0.762367	0.693344	2
CLEC7A	12p13.2	0.622212	6.35838e-41	5.58957e-38		CLEC7A	12p13.2	0.6799	2.37631e-36	2.34057e-33		CLEC7A	0.622212	0.6799	0.651056	2
NCF2	1q25.3	0.620047	1.42476e-40	1.2003e-37		PLEK	2p14	0.677243	5.61125e-36	5.29655e-33		NCF2	0.620047	0.637498	0.628773	2
ICOS	2q33.2	0.619658	1.6463e-40	1.33146e-37		TNIP3	4q27	0.672538	2.5144e-35	2.27845e-32		ICOS	0.619658	0.69916	0.659409	2
HAVCR2	5q33.3	0.615344	8.04937e-40	6.25962e-37		CLEC6A	12p13.31	0.671975	3.00287e-35	2.52718e-32		HAVCR2	0.615344	0.640792	0.628068	2
IRF1	5q31.1	0.610684	4.34837e-39	3.25629e-36		ITGAE	17p13.2	0.671965	3.01201e-35	2.52718e-32		IRF1	0.610684	0.661457	0.636071	2
SLC31A2	9q32	0.608805	8.51841e-39	6.1512e-36		SAMD9L	7q21.2	0.67173	3.24318e-35	2.62397e-32		SLC31A2	0.608805	0.615804	0.612305	2
APOL6	22q12.3	0.608408	9.81539e-39	6.64118e-36		CLEC4A	12p13.31	0.669676	6.1763e-35	4.82475e-32		APOL6	0.608408	0.668772	0.63859	2
ADGRE2	19p13.12	0.608397	9.85387e-39	6.64118e-36		APOL6	22q12.3	0.668772	8.18749e-35	6.18265e-32		ADGRE2	0.608397	0.630532	0.619464	2
MEFV	16p13.3	0.605973	2.32712e-38	1.51781e-35		AIM2	1q23.1-q23.2	0.666179	1.82753e-34	1.33551e-31		MEFV	0.605973		0.605973	1
MMP25	16p13.3	0.604946	3.34259e-38	2.11199e-35		BTN3A1	6p22.2	0.663057	4.7544e-34	3.36582e-31		MMP25	0.604946	0.623053	0.614	2
SLAMF7	1q23.3	0.602909	6.82574e-38	4.18211e-35		FCGR3A	1q23.3	0.661574	7.45693e-34	5.11907e-31		SLAMF7	0.602909	0.602535	0.602722	2
CLEC4A	12p13.31	0.602697	7.34913e-38	4.37035e-35		IRF1	5q31.1	0.661457	7.72495e-34	5.14709e-31		CLEC4A	0.602697	0.669676	0.636187	2
NLRC5	16q13	0.602047	9.21777e-38	5.32498e-35		TLR8	Xp22.2	0.660997	8.87736e-34	5.50653e-31		NLRC5	0.602047	0.64385	0.622949	2
FCGR3A	1q23.3	0.60162	1.06944e-37	6.0064e-35		FASLG	1q24.3	0.660991	8.89394e-34	5.50653e-31		FCGR3A	0.60162	0.661574	0.631597	2
						IL2RB	22q12.3	0.660954	8.99363e-34	5.50653e-31		GZMB		0.699816	0.699816	1
						CXCR2P1	2q35	0.659951	1.21685e-33	7.25435e-31		CTLA4		0.692344	0.692344	1
						IL18RAP	2q12.1	0.658794	1.72201e-33	1.00027e-30		CXCL11		0.689703	0.689703	1
						TNFRSF9	1p36.23	0.649741	2.47423e-32	1.40128e-29		C5ORF56		0.688985	0.688985	1
						PARP14	3q21.1	0.645369	8.6772e-32	4.79447e-29		VSIG8		0.682378	0.682378	1
						NLRC5	16q13	0.64385	1.33553e-31	7.08915e-29		TNIP3		0.672538	0.672538	1
						ADAMDEC1	8p21.2	0.643823	1.34561e-31	7.08915e-29		CLEC6A		0.671975	0.671975	1
						GZMA	5q11.2	0.64278	1.80677e-31	9.30242e-29		ITGAE		0.671965	0.671965	1
						ICAM1	19p13.2	0.641724	2.4318e-31	1.22422e-28		SAMD9L		0.67173	0.67173	1
						HAVCR2	5q33.3	0.640792	3.15805e-31	1.55527e-28		AIM2		0.666179	0.666179	1
						CD86	3q13.33	0.638541	5.91341e-31	2.84737e-28		BTN3A1		0.663057	0.663057	1
						PRF1	10q22.1	0.638469	6.0331e-31	2.84737e-28		FASLG		0.660991	0.660991	1
						CD226	18q22.2	0.638219	6.46633e-31	2.98955e-28		CXCR2P1		0.659951	0.659951	1
						KLRD1	12p13.2	0.637863	7.13706e-31	3.23366e-28		IL18RAP		0.658794	0.658794	1
						ZBED2	3q13.13	0.637716	7.43292e-31	3.30167e-28		TNFRSF9		0.649741	0.649741	1
						NCF2	1q25.3	0.637498	7.8946e-31	3.43931e-28		PARP14		0.645369	0.645369	1
						TNFSF13B	13q33.3	0.635299	1.44648e-30	6.18275e-28		ADAMDEC1		0.643823	0.643823	1
						GBP1P1	1p22.2	0.63467	1.71874e-30	7.21045e-28		GZMA		0.64278	0.64278	1
						IL21	4q27	0.634035	2.0442e-30	8.41988e-28		CD86		0.638541	0.638541	1
						TIGIT	3q13.31	0.633037	2.68328e-30	1.08548e-27		KLRD1		0.637863	0.637863	1
						CD300LF	17q25.1	0.63269	2.94852e-30	1.17186e-27		ZBED2		0.637716	0.637716	1
						ADGRE2	19p13.12	0.630532	5.28611e-30	2.06468e-27		TNFSF13B		0.635299	0.635299	1
						LGALS17A	19q13.2	0.626229	1.67047e-29	6.41404e-27		GBP1P1		0.63467	0.63467	1
						MIR155HG	-	0.626045	1.75401e-29	6.62257e-27		IL21		0.634035	0.634035	1
						PARP9	3q21.1	0.624508	2.63345e-29	9.78005e-27		TIGIT		0.633037	0.633037	1
						MMP25	16p13.3	0.623053	3.86079e-29	1.4033e-26		CD300LF		0.63269	0.63269	1
						KLRC4	12p13.2	0.623012	3.90253e-29	1.4033e-26		LGALS17A		0.626229	0.626229	1
						SAMSN1	21q11.2	0.622295	4.70974e-29	1.6671e-26		MIR155HG		0.626045	0.626045	1
						LAG3	12p13.31	0.622198	4.83002e-29	1.67921e-26		PARP9		0.624508	0.624508	1
						CYBB	Xp21.1-p11.4	0.622149	4.89219e-29	1.67921e-26		KLRC4		0.623012	0.623012	1
						CD96	3q13.13-q13.2	0.621651	5.57209e-29	1.88403e-26		SAMSN1		0.622295	0.622295	1
						HK3	5q35.2	0.621522	5.76289e-29	1.91989e-26		LAG3		0.622198	0.622198	1
						TRAFD1	12q24.13	0.62103	6.5515e-29	2.15098e-26		CYBB		0.622149	0.622149	1
						TAP1	6p21.32	0.616945	1.88317e-28	6.09448e-26		CD96		0.621651	0.621651	1
						SLC31A2	9q32	0.615804	2.52177e-28	8.04623e-26		HK3		0.621522	0.621522	1
						CCR1	3p21.31	0.61567	2.60963e-28	8.21092e-26		TRAFD1		0.62103	0.62103	1
						JAK2	9p24.1	0.614651	3.38424e-28	1.05023e-25		TAP1		0.616945	0.616945	1
						CD2	1p13.1	0.614019	3.97383e-28	1.21653e-25		CCR1		0.61567	0.61567	1
						PTPN22	1p13.2	0.612961	5.19563e-28	1.56936e-25		JAK2		0.614651	0.614651	1
						PSMB8-AS1	6p21.32	0.612217	6.27041e-28	1.86908e-25		CD2		0.614019	0.614019	1
						LILRB2	19q13.42	0.611833	6.90838e-28	2.0325e-25		PTPN22		0.612961	0.612961	1
						IL21R	16p12.1	0.611614	7.29983e-28	2.12013e-25		PSMB8-AS1		0.612217	0.612217	1
						SIGLEC10	19q13.41	0.61154	7.43675e-28	2.13256e-25		LILRB2		0.611833	0.611833	1
						CD53	1p13.3	0.610594	9.43105e-28	2.67064e-25		IL21R		0.611614	0.611614	1
						PLA2G7	6p12.3	0.608868	1.45238e-27	4.062e-25		SIGLEC10		0.61154	0.61154	1
						LCP1	13q14.13	0.606617	2.5398e-27	7.01667e-25		CD53		0.610594	0.610594	1
						TFEC	7q31.2	0.606439	2.65415e-27	7.24423e-25		PLA2G7		0.608868	0.608868	1
						CXCR6	3p21.31	0.606298	2.74841e-27	7.41219e-25		LCP1		0.606617	0.606617	1
						IL21R-AS1	16p12.1	0.605945	2.99844e-27	7.99137e-25		TFEC		0.606439	0.606439	1
						UBE2L6	11q12.1	0.60576	3.13819e-27	8.26658e-25		CXCR6		0.606298	0.606298	1
						OR56B1	11p15.4	0.604684	4.09025e-27	1.06506e-24		IL21R-AS1		0.605945	0.605945	1
						FPR3	19q13.41	0.604105	4.71447e-27	1.21365e-24		UBE2L6		0.60576	0.60576	1
						SLAMF7	1q23.3	0.602535	6.92043e-27	1.76152e-24		OR56B1		0.604684	0.604684	1
						GPR141	7p14.1	0.601309	9.32485e-27	2.34717e-24		FPR3		0.604105	0.604105	1
						LILRB4	19q13.42	0.601111	9.78441e-27	2.43578e-24		GPR141		0.601309	0.601309	1
						MNDA	1q23.1	0.60101	1.00278e-26	2.46924e-24		LILRB4		0.601111	0.601111	1
												MNDA		0.60101	0.60101	1

## Sheet: Head & Neck
Head and Neck Squamous Cell Carcinoma (TCGA, Firehose Legacy)	496 Patients/Samples					Head and Neck Squamous Cell Carcinoma (TCGA, Nature 2015)	279 Patients/Samples
Correlated Gene	Cytoband	Spearman's Correlation	p-Value	q-Value		Correlated Gene	Cytoband	Spearman's Correlation	p-Value	q-Value		Positive Correlation Gene	Study 1	Study 2	Average	Number of Studies
PDCD1LG2	9p24.1	0.755957	5.95239e-93	1.20214e-88		PDCD1LG2	9p24.1	0.762877	2.14987e-54	4.32424e-50		PDCD1LG2	0.755957	0.762877	0.759417	2
JAK2	9p24.1	0.696279	3.69997e-73	3.73623e-69		JAK2	9p24.1	0.708457	8.04214e-44	8.08798e-40		JAK2	0.696279	0.708457	0.702368	2
GBP1	1p22.2	0.670306	5.38813e-66	3.62729e-62		APOL6	22q12.3	0.680543	2.70074e-39	1.81076e-35		GBP1	0.670306	0.679385	0.674846	2
APOL6	22q12.3	0.667323	3.2208e-65	1.62618e-61		GBP1	1p22.2	0.679385	4.05898e-39	2.04106e-35		APOL6	0.667323	0.680543	0.673933	2
GBP5	1p22.2	0.657891	8.02665e-63	3.24212e-59		SAMHD1	20q11.23	0.670849	7.72404e-38	3.10723e-34		GBP5	0.657891	0.662576	0.660233	2
RIC1	9p24.1	0.641601	7.0137e-59	2.36081e-55		CCL4	17q12	0.667229	2.61614e-37	8.77018e-34		RIC1	0.641601	0.639432	0.640517	2
CXCL9	4q21.1	0.631689	1.34739e-56	3.88742e-53		CXCL10	4q21.1	0.662963	1.07759e-36	2.79777e-33		CXCL9	0.631689	0.661086	0.646388	2
STAT1	2q32.2	0.63067	2.28875e-56	5.77795e-53		GBP5	1p22.2	0.662576	1.22399e-36	2.79777e-33		STAT1	0.63067	0.65194	0.641305	2
CXCL10	4q21.1	0.627057	1.47363e-55	3.30682e-52		GBP4	1p22.2	0.662507	1.25186e-36	2.79777e-33		CXCL10	0.627057	0.662963	0.64501	2
SAMHD1	20q11.23	0.624348	5.85864e-55	1.18321e-51		CXCL9	4q21.1	0.661086	1.99394e-36	4.01061e-33		SAMHD1	0.624348	0.670849	0.647599	2
CXCL11	4q21.1	0.613285	1.43201e-52	2.62916e-49		CD80	3q13.33	0.65797	5.48693e-36	1.00331e-32		CXCL11	0.613285	0.657657	0.635471	2
RANBP6	9p24.1	0.603818	1.33561e-50	2.20013e-47		CXCL11	4q21.1	0.657657	6.07086e-36	1.01758e-32		RANBP6	0.603818		0.603818	1
GBP4	1p22.2	0.603694	1.4162e-50	2.20013e-47		TNFSF13B	13q33.3	0.652916	2.76267e-35	4.27449e-32		GBP4	0.603694	0.662507	0.6331	2
						STAT1	2q32.2	0.65194	3.76113e-35	5.40368e-32		CCL4		0.667229	0.667229	1
						CXCR2P1	2q35	0.650473	5.96821e-35	7.55916e-32		CD80		0.65797	0.65797	1
						LAG3	12p13.31	0.650449	6.01306e-35	7.55916e-32		TNFSF13B		0.652916	0.652916	1
						IL12RB1	19p13.11	0.649563	7.93572e-35	9.38936e-32		CXCR2P1		0.650473	0.650473	1
						IFNG	12q15	0.643341	5.43239e-34	6.07039e-31		LAG3		0.650449	0.650449	1
						RIC1	9p24.1	0.639432	1.77827e-33	1.88254e-30		IL12RB1		0.649563	0.649563	1
						TRIM22	11p15.4	0.63391	9.22687e-33	9.27946e-30		IFNG		0.643341	0.643341	1
						SLA2	20q11.23	0.632629	1.34509e-32	1.28834e-29		TRIM22		0.63391	0.63391	1
						GZMB	14q12	0.632111	1.5663e-32	1.43203e-29		SLA2		0.632629	0.632629	1
						FPR3	19q13.41	0.631713	1.75991e-32	1.53908e-29		GZMB		0.632111	0.632111	1
						IL18BP	11q13.4	0.62977	3.10179e-32	2.59956e-29		FPR3		0.631713	0.631713	1
						C1QC	1p36.12	0.629168	3.69453e-32	2.97247e-29		IL18BP		0.62977	0.62977	1
						PRF1	10q22.1	0.627341	6.26357e-32	4.8456e-29		C1QC		0.629168	0.629168	1
						FCGR3A	1q23.3	0.626332	8.37217e-32	6.12199e-29		PRF1		0.627341	0.627341	1
						RNF213	17q25.3	0.626271	8.52221e-32	6.12199e-29		FCGR3A		0.626332	0.626332	1
						IDO1	8p11.21	0.62507	1.20194e-31	8.33646e-29		RNF213		0.626271	0.626271	1
						LAP3	4p15.32	0.624832	1.28654e-31	8.62581e-29		IDO1		0.62507	0.62507	1
						C1QB	1p36.12	0.624227	1.52884e-31	9.91967e-29		LAP3		0.624832	0.624832	1
						IRF1	5q31.1	0.622622	2.41199e-31	1.51609e-28		C1QB		0.624227	0.624227	1
						LILRB2	19q13.42	0.622446	2.53503e-31	1.54514e-28		IRF1		0.622622	0.622622	1
						CCR5	3p21.31	0.621981	2.89152e-31	1.71059e-28		LILRB2		0.622446	0.622446	1
						TRANK1	3p22.2	0.621558	3.25807e-31	1.87237e-28		CCR5		0.621981	0.621981	1
						CXCR6	3p21.31	0.621265	3.53855e-31	1.93565e-28		TRANK1		0.621558	0.621558	1
						HAVCR2	5q33.3	0.621243	3.56066e-31	1.93565e-28		CXCR6		0.621265	0.621265	1
						CCR1	3p21.31	0.618108	8.57239e-31	4.5375e-28		HAVCR2		0.621243	0.621243	1
						APOL3	22q12.3	0.616559	1.31832e-30	6.79915e-28		CCR1		0.618108	0.618108	1
						LCP2	5q35.1	0.616113	1.49157e-30	7.50037e-28		APOL3		0.616559	0.616559	1
						FASLG	1q24.3	0.614588	2.27216e-30	1.11469e-27		LCP2		0.616113	0.616113	1
						C3AR1	12p13.31	0.611914	4.72509e-30	2.26287e-27		FASLG		0.614588	0.614588	1
						SAMD9L	7q21.2	0.609108	1.01148e-29	4.73138e-27		C3AR1		0.611914	0.611914	1
						ICOS	2q33.2	0.608841	1.08698e-29	4.96898e-27		SAMD9L		0.609108	0.609108	1
						CTLA4	2q33.2	0.607262	1.66166e-29	7.42726e-27		ICOS		0.608841	0.608841	1
						NKG7	19q13.41	0.606124	2.25324e-29	9.85252e-27		CTLA4		0.607262	0.607262	1
						C1QA	1p36.12	0.605528	2.64125e-29	1.13034e-26		NKG7		0.606124	0.606124	1
						PDCD1	2q37.3	0.604252	3.70837e-29	1.55396e-26		C1QA		0.605528	0.605528	1
						CD8A	2p11.2	0.603922	4.04728e-29	1.66137e-26		PDCD1		0.604252	0.604252	1
						SIGLEC10	19q13.41	0.603482	4.5471e-29	1.82921e-26		CD8A		0.603922	0.603922	1
						IGSF6	16p12.2	0.60308	5.05728e-29	1.99455e-26		SIGLEC10		0.603482	0.603482	1
						C5ORF56	5q31.1	0.601898	6.90607e-29	2.67132e-26		IGSF6		0.60308	0.60308	1
												C5ORF56		0.601898	0.601898	1

## Sheet: Lymphoma
Lymphoid Neoplasm Diffuse Large B-cell Lymphoma (TCGA, Firehose Legacy)	48 Patients/Samples				One Study, Positive and Negative Available
Correlated Gene	Cytoband	Spearman's Correlation	p-Value	q-Value	Number
CCR1	3p21.31	0.880265	1.68706e-16	3.38069e-12	1
SUCNR1	3q25.1	0.850732	1.92808e-14	1.93184e-10	1
RNF213	17q25.3	0.8363	1.36718e-13	9.13232e-10	1
PDCD1LG2	9p24.1	0.826965	4.40057e-13	2.20457e-09	1
RGL1	1q25.3	0.821429	8.52166e-13	2.84609e-09	1
FCAR	19q13.42	0.807916	3.90436e-12	1.11771e-08	1
SLC30A1	1q32.3	0.803951	5.96605e-12	1.28061e-08	1
P2RX7	12q24.31	0.8033	6.39059e-12	1.28061e-08	1
RDX	11q22.3	0.8033	6.39059e-12	1.28061e-08	1
DMXL2	15q21.2	0.794724	1.54371e-11	2.50682e-08	1
TSPAN5	4q23	0.792987	1.8363e-11	2.50682e-08	1
FLVCR2	14q24.3	0.792553	1.91725e-11	2.50682e-08	1
GBP1	1p22.2	0.792553	1.91725e-11	2.50682e-08	1
PARP9	3q21.1	0.792228	1.98015e-11	2.50682e-08	1
HRH2	5q35.2	0.792119	2.00155e-11	2.50682e-08	1
DAGLA	11q12.2	0.790165	2.4262e-11	2.85992e-08	1
GK3P	4q32.3	0.784954	4.01339e-11	4.46802e-08	1
FNIP2	4q32.1	0.784303	4.26984e-11	4.50333e-08	1
RNF217	6q22.31	0.781013	5.81943e-11	5.72945e-08	1
HELB	12q14.3|12q	0.780612	6.04115e-11	5.72945e-08	1
USP32	17q23.1-q23.2	0.780178	6.29013e-11	5.72945e-08	1
ARSB	5q14.1	0.778116	7.61098e-11	6.63114e-08	1
FPR2	19q13.41	0.776379	8.92219e-11	7.44966e-08	1
SAMD9L	7q21.2	0.774316	1.07561e-10	8.62165e-08	1
SLC38A7	16q21	0.773339	1.17439e-10	8.89928e-08	1
SPATA13	13q12.12	0.772796	1.23291e-10	8.89928e-08	1
CASP10	2q33.1	0.772254	1.29417e-10	8.89928e-08	1
FMN1	15q13.3	0.772021	1.32124e-10	8.89928e-08	1
EPB41L3	18p11.31	0.771928	1.33229e-10	8.89928e-08	1
TNFSF10	3q26.31	0.770408	1.52464e-10	9.5476e-08	1
CCR5	3p21.31	0.769648	1.63037e-10	9.79449e-08	1
UHRF1BP1L	12q23.1	0.769431	1.66182e-10	9.79449e-08	1
DRAM1	12q23.2	0.76878	1.75966e-10	1.00748e-07	1
MYOF	10q23.33	0.765957	2.24987e-10	1.21852e-07	1
SOCS3	17q25.3	0.764763	2.49383e-10	1.3151e-07	1
SAMHD1	20q11.23	0.763244	2.84049e-10	1.43625e-07	1
LDLR	19p13.2	0.763135	2.86692e-10	1.43625e-07	1
SLC8A1	2p22.1	0.758467	4.24963e-10	2.01658e-07	1
ABCD2	12q12	0.75825	4.32722e-10	2.01658e-07	1
NAGA	22q13.2	0.756947	4.82149e-10	2.17717e-07	1
FRMD4B	3p14.1	0.756513	4.99774e-10	2.17717e-07	1
IGF2R	6q25.3	0.756513	4.99774e-10	2.17717e-07	1
DOCK5	8p21.2	0.754993	5.66361e-10	2.41475e-07	1
CBX6	22q13.1	0.754125	6.08077e-10	2.53859e-07	1
CGAS	6q13	0.752714	6.82093e-10	2.73369e-07	1
HS3ST3B1	17p12	0.75171	7.39828e-10	2.90694e-07	1
RAB10	2p23.3	0.751411	7.57876e-10	2.92059e-07	1
ZNF267	16p11.2	0.750543	8.1273e-10	3.04238e-07	1
PLSCR1	3q24	0.750434	8.19844e-10	3.04238e-07	1
PLXNC1	12q22	0.749783	8.63773e-10	3.14712e-07	1
MYO5A	15q21.2	0.74924	9.02065e-10	3.1989e-07	1
FAM225B	9q32	0.74848	9.58366e-10	3.31115e-07	1
SNX20	16q12.1	0.746092	1.15762e-09	3.80288e-07	1
CLOCK	4q12	0.745766	1.18764e-09	3.83855e-07	1
IL17RA	22q11.1	0.743378	1.43119e-09	4.55233e-07	1
DDX58	9p21.1	0.742727	1.50536e-09	4.64091e-07	1
ARHGAP31	3q13.32-q13.33	0.741533	1.65081e-09	4.83454e-07	1
IQGAP1	15q26.1	0.741424	1.66467e-09	4.83454e-07	1
SDAD1	4q21.1	0.740881	1.73562e-09	4.96859e-07	1
CD84	1q23.3	0.739687	1.90186e-09	5.3678e-07	1
MAN2A1	5q21.3	0.738927	2.01532e-09	5.60904e-07	1
GBP4	1p22.2	0.738385	2.10024e-09	5.76529e-07	1
RSC1A1	1p36.21	0.737299	2.28026e-09	6.17488e-07	1
STARD8	Xq13.1	0.736214	2.47472e-09	6.46242e-07	1
DOCK4	7q31.1	0.736105	2.495e-09	6.46242e-07	1
PCNX1	14q24.2	0.735997	2.51544e-09	6.46242e-07	1
IL31RA	5q11.2	0.735636	2.58444e-09	6.55565e-07	1
MAP3K2	2q14.3	0.731329	3.5592e-09	8.59311e-07	1
RASGRP1	15q14	0.728832	4.27279e-09	1.01931e-06	1
ADGRE2	19p13.12	0.728506	4.37521e-09	1.03147e-06	1
KLF3	4p14	0.727312	4.77082e-09	1.11166e-06	1
SCARB2	4q21.1	0.726769	4.96155e-09	1.12982e-06	1
ATF3	1q32.3	0.725792	5.32303e-09	1.19448e-06	1
LONP2	16q12.1	0.725684	5.36468e-09	1.19448e-06	1
PANX1	11q21	0.72525	5.5344e-09	1.21489e-06	1
LPCAT2	16q12.2	0.725141	5.57761e-09	1.21489e-06	1
PPP4R2	3p13	0.72373	6.16896e-09	1.30126e-06	1
USP15	12q14.1	0.723513	6.265e-09	1.30752e-06	1
LILRA1	19q13.42	0.72337	6.32911e-09	1.30752e-06	1
ZEB2	2q22.3	0.722644	6.66339e-09	1.36253e-06	1
ERCC6L2	9q22.32	0.72145	7.25014e-09	1.42437e-06	1
ARID3B	15q24.1	0.720908	7.53258e-09	1.4514e-06	1
LOC729603	6q25.3	0.720908	7.53258e-09	1.4514e-06	1
KIF13A	6p22.3	0.720365	7.82533e-09	1.49345e-06	1
GBP5	1p22.2	0.720148	7.9454e-09	1.50206e-06	1
USP3	15q22.31	0.719388	8.37939e-09	1.56161e-06	1
TMEM150B	19q13.42	0.719062	8.57212e-09	1.56161e-06	1
SGTB	5q12.3	0.719062	8.57212e-09	1.56161e-06	1
SEC24A	5q31.1	0.718519	8.9026e-09	1.60279e-06	1
CYSLTR2	13q14.2	0.718302	9.03812e-09	1.60279e-06	1
VRK2	2p16.1	0.717651	9.45637e-09	1.66024e-06	1
ERO1A	14q22.1	0.717542	9.52782e-09	1.66024e-06	1
SLC11A2	12q13.12	0.716674	1.0118e-08	1.73294e-06	1
EML4	2p21	0.715914	1.06623e-08	1.79548e-06	1
DUSP3	17q21.31	0.715914	1.06623e-08	1.79548e-06	1
JAK2	9p24.1	0.71548	1.09856e-08	1.83296e-06	1
TNIP3	4q27	0.715154	1.1234e-08	1.84392e-06	1
LRRC3	21q22.3	0.715046	1.1318e-08	1.84392e-06	1
KLF6	10p15.2	0.714503	1.17469e-08	1.88316e-06	1
GLUL	1q25.3	0.713743	1.23729e-08	1.95143e-06	1
RPS29	14q21.3	-0.670104	1.8938e-07	1.05124e-05	1
GATD3A	21q22.3	-0.67043	1.85875e-07	1.04043e-05	1
CHCHD10	22q11.23	-0.670538	1.84721e-07	1.03687e-05	1
NSMCE1	16p12.1	-0.671081	1.79048e-07	1.01641e-05	1
PSTK	10q26.13	-0.671298	1.76824e-07	1.0124e-05	1
WDR74	11q12.3	-0.672601	1.64017e-07	9.75291e-06	1
HDDC2	6q22.31	-0.672818	1.61968e-07	9.65977e-06	1
SWSAP1	19p13.2	-0.673035	1.59944e-07	9.5675e-06	1
RPS12	6q23.2	-0.673904	1.5208e-07	9.26299e-06	1
HMG20B	19p13.3	-0.674012	1.51122e-07	9.23275e-06	1
DNAJC7	17q21.2	-0.674229	1.49225e-07	9.1447e-06	1
RPL18A	19p13.11	-0.674338	1.48284e-07	9.14299e-06	1
HCFC1R1	16p13.3	-0.674989	1.42757e-07	8.82936e-06	1
RPS8	1p34.1	-0.675749	1.36552e-07	8.60494e-06	1
MMP24	20q11.22	-0.675858	1.35687e-07	8.60451e-06	1
CD72	9p13.3	-0.67716	1.25692e-07	8.09869e-06	1
YDJC	22q11.21	-0.677812	1.20957e-07	7.86965e-06	1
UBA52	19p13.11	-0.67792	1.20184e-07	7.86965e-06	1
ATG4B	2q37.3	-0.678137	1.18652e-07	7.84709e-06	1
OGFOD2	12q24.31	-0.678137	1.18652e-07	7.84709e-06	1
VPS28	8q24.3	-0.678354	1.17139e-07	7.82447e-06	1
NHP2	5q35.3	-0.678789	1.14165e-07	7.7029e-06	1
TOMM7	7p15.3	-0.679223	1.11263e-07	7.63268e-06	1
SH3GLB2	9q34.11	-0.67944	1.09838e-07	7.56371e-06	1
RACK1	5q35.3	-0.679657	1.0843e-07	7.51841e-06	1
KRT10	17q21.2	-0.679766	1.07732e-07	7.49597e-06	1
RPL22	1p36.31	-0.679983	1.06349e-07	7.4515e-06	1
FRA10AC1	10q23.33	-0.680308	1.04306e-07	7.33398e-06	1
TCEA2	20q13.33	-0.680525	1.02964e-07	7.26513e-06	1
ASPSCR1	17q25.3	-0.681611	9.64942e-08	6.90588e-06	1
IMMP1L	11p13	-0.682371	9.21937e-08	6.71807e-06	1
EPB41L4A-AS1	5q22.1	-0.682588	9.09983e-08	6.7041e-06	1
RPL35A	3q29	-0.683131	8.80729e-08	6.58542e-06	1
MCRS1	12q13.12	-0.683565	8.57961e-08	6.48153e-06	1
SGF29	16p11.2	-0.683782	8.46785e-08	6.45199e-06	1
CEP131	17q25.3	-0.684976	7.87711e-08	6.09457e-06	1
ROMO1	20q11.22	-0.685953	7.42268e-08	5.90251e-06	1
MRPL20-AS1	1p36.33	-0.687364	6.80942e-08	5.54691e-06	1
H3F3A	1q42.12	-0.687581	6.71939e-08	5.49592e-06	1
POLR2J	7q22.1	-0.688016	6.54267e-08	5.39541e-06	1
RPS11	19q13.33	-0.688776	6.24382e-08	5.23515e-06	1
POP5	12q24.31	-0.688993	6.16082e-08	5.22209e-06	1
COMMD6	13q22.2	-0.690404	5.64592e-08	4.96222e-06	1
KLC4	6p21.1	-0.690512	5.60803e-08	4.95063e-06	1
TCAP	17q12	-0.690512	5.60803e-08	4.95063e-06	1
ANAPC16	10q22.1	-0.692575	4.9318e-08	4.53341e-06	1
RPL32	3p25.2	-0.692901	4.83228e-08	4.49123e-06	1
SVBP	1p34.2	-0.693226	4.73465e-08	4.49123e-06	1
NUDT1	7p22.3	-0.693443	4.67058e-08	4.49123e-06	1
RPS21	20q13.33	-0.693552	4.63886e-08	4.49073e-06	1
SHISAL2A	1p32.3	-0.694529	4.36227e-08	4.26417e-06	1
OCIAD2	4p11	-0.695072	4.21536e-08	4.14076e-06	1
ECI1	16p13.3	-0.6967	3.80194e-08	3.90703e-06	1
FAU	11q13.1	-0.696809	3.77578e-08	3.90015e-06	1
RPL24	3q12.3	-0.697026	3.72396e-08	3.88669e-06	1
RPL28	19q13.42	-0.697134	3.6983e-08	3.88011e-06	1
LSM7	19p13.3	-0.697894	3.52325e-08	3.8079e-06	1
GTF2IRD2	7q11.23	-0.698328	3.42674e-08	3.73199e-06	1
COX19	7p22.3	-0.699197	3.24111e-08	3.5686e-06	1
DNASE1	16p13.3	-0.700065	3.06493e-08	3.43118e-06	1
ZNF653	19p13.2	-0.700282	3.02231e-08	3.40247e-06	1
GLI4	8q24.3	-0.700716	2.93873e-08	3.32707e-06	1
SUGP1	19p13.11	-0.70267	2.58871e-08	3.03364e-06	1
RPL8	8q24.3	-0.704082	2.36066e-08	2.87322e-06	1
AARSD1	17q21.31	-0.70419	2.34392e-08	2.87322e-06	1
RPL30	8q22.2	-0.705167	2.19819e-08	2.71911e-06	1
WDR83OS	19p13.13	-0.70647	2.01708e-08	2.59104e-06	1
RPS23	5q14.2	-0.706904	1.95988e-08	2.53381e-06	1
DUS1L	17q25.3	-0.70723	1.91799e-08	2.49575e-06	1
TRAPPC6A	19q13.32	-0.70799	1.82348e-08	2.40399e-06	1
ERI3	1p34.1	-0.709401	1.65944e-08	2.23178e-06	1
SDHAF1	19q13.12	-0.709618	1.63547e-08	2.22946e-06	1
SPPL2B	19p13.3	-0.709835	1.61182e-08	2.22946e-06	1
METTL23	17q25.1	-0.712766	1.32239e-08	2.03841e-06	1
ZNHIT1	7q22.1	-0.714828	1.14878e-08	1.85648e-06	1
BANF1	11q13.1	-0.715371	1.10678e-08	1.83296e-06	1
RPL14	3p22.1	-0.717325	9.67225e-09	1.67088e-06	1
YBEY	21q22.3	-0.718302	9.03812e-09	1.60279e-06	1
RPL19	17q12	-0.719062	8.57212e-09	1.56161e-06	1
IFT20	17q11.2	-0.72145	7.25014e-09	1.42437e-06	1
UCN	2p23.3	-0.721559	7.19486e-09	1.42437e-06	1
QTRT1	19p13.2	-0.72221	6.87139e-09	1.39087e-06	1
RPL23P8	7p21.1	-0.724056	6.02748e-09	1.28494e-06	1
SMDT1	22q13.2	-0.724273	5.93487e-09	1.2788e-06	1
RPL23A	17q11.2	-0.726878	4.92284e-09	1.12982e-06	1
DUSP28	2q37.3	-0.73198	3.39239e-09	8.29026e-07	1
NSUN5	7q11.23	-0.733391	3.05585e-09	7.56002e-07	1
CIRBP	19p13.3	-0.734911	2.72866e-09	6.83495e-07	1
EXD3	9q34.3	-0.736974	2.33703e-09	6.24424e-07	1
RPL23	17q12	-0.74175	1.62342e-09	4.83454e-07	1
ZNF428	19q13.31	-0.74175	1.62342e-09	4.83454e-07	1
MRPS26	20p13	-0.742727	1.50536e-09	4.64091e-07	1
GNRHR2	1q21.1	-0.746635	1.10918e-09	3.70447e-07	1
C22ORF39	22q11.21	-0.746852	1.09034e-09	3.70328e-07	1
AKAP8L	19p13.12	-0.749132	9.09913e-10	3.1989e-07	1
APOM	6p21.33	-0.752822	6.76111e-10	2.73369e-07	1
RPP21	6p22.1	-0.758684	4.17336e-10	2.01658e-07	1
ZNHIT3	17q12	-0.766609	2.12647e-10	1.18368e-07	1
USE1	19p13.11	-0.770625	1.49565e-10	9.5476e-08	1
PRKRIP1	7q22.1	-0.822297	7.6941e-13	2.84609e-09	1

## Sheet: Breast
Breast Invasive Carcinoma (TCGA, Firehose Legacy)	960 Patients/Samples					Breast Invasive Carcinoma (TCGA, Cell 2015)	816 Patients/Samples
Correlated Gene	Cytoband	Spearman's Correlation	p-Value	q-Value		Correlated Gene	Cytoband	Spearman's Correlation	p-Value	q-Value		Positive Correlation Gene	Study 1	Study 2	Average	Number of Studies
PDCD1LG2	9p24.1	0.741881	1.77724e-168	3.5847e-164		PDCD1LG2	9p24.1	0.747073	1.63112e-146	3.28524e-142		PDCD1LG2	0.741881	0.747073	0.744477	2
GBP4	1p22.2	0.729737	2.32267e-160	2.34241e-156		GBP5	1p22.2	0.730305	7.31103e-137	7.36257e-133		GBP4	0.729737	0.723163	0.72645	2
SLFN12L	17q12	0.728351	1.83749e-159	1.23541e-155		GBP4	1p22.2	0.723163	5.71527e-133	3.83704e-129		SLFN12L	0.728351		0.728351	1
GBP5	1p22.2	0.727106	1.16388e-158	5.86885e-155		PTPRC	1q31.3-q32.1	0.720838	9.94891e-132	5.00952e-128		GBP5	0.727106	0.730305	0.728705	2
TNFRSF9	1p36.23	0.720273	2.45529e-154	9.90466e-151		TNFRSF9	1p36.23	0.71612	3.00358e-129	1.2099e-125		TNFRSF9	0.720273	0.71612	0.718197	2
PTPRC	1q31.3-q32.1	0.715785	1.44719e-151	4.86498e-148		CD226	18q22.2	0.711769	5.24985e-127	1.76229e-123		PTPRC	0.715785	0.720838	0.718312	2
SAMHD1	20q11.23	0.713229	5.18121e-150	1.49293e-146		GBP1	1p22.2	0.705197	1.06998e-123	3.07863e-120		SAMHD1	0.713229	0.701587	0.707408	2
GBP1	1p22.2	0.712418	1.59865e-149	4.0306e-146		TRIM22	11p15.4	0.702941	1.39444e-122	3.51068e-119		GBP1	0.712418	0.705197	0.708808	2
TRIM22	11p15.4	0.707126	2.27227e-146	5.0924e-143		SAMHD1	20q11.23	0.701587	6.43025e-122	1.43902e-118		TRIM22	0.707126	0.702941	0.705033	2
APOL6	22q12.3	0.704158	1.24144e-144	2.50399e-141		PTPN22	1p13.2	0.697293	7.75657e-120	1.56225e-116		APOL6	0.704158	0.692138	0.698148	2
CD226	18q22.2	0.700041	2.93913e-142	5.38929e-139		CCR5	3p21.31	0.696061	3.02176e-119	5.53283e-116		CD226	0.700041	0.711769	0.705905	2
CCR5	3p21.31	0.694901	2.37563e-139	3.99304e-136		TNFSF13B	13q33.3	0.694607	1.48926e-118	2.4996e-115		CCR5	0.694901	0.696061	0.695481	2
TNFSF13B	13q33.3	0.692347	6.28525e-138	9.75181e-135		SNX20	16q12.1	0.694031	2.79441e-118	4.32939e-115		TNFSF13B	0.692347	0.694607	0.693477	2
STAT1	2q32.2	0.691762	1.32289e-137	1.90591e-134		APOL6	22q12.3	0.692138	2.18875e-117	3.14883e-114		STAT1	0.691762	0.677694	0.684728	2
PTPN22	1p13.2	0.688602	7.18859e-136	9.59735e-133		CD3G	11q23.3	0.683843	1.50001e-113	2.01411e-110		PTPN22	0.688602	0.697293	0.692947	2
SNX20	16q12.1	0.688556	7.61317e-136	9.59735e-133		FYB1	5p13.1	0.683449	2.26537e-113	2.85167e-110		SNX20	0.688556	0.694031	0.691294	2
CD3G	11q23.3	0.6814	5.35127e-132	6.34913e-129		LCP2	5q35.1	0.680377	5.51248e-112	6.531e-109		CD3G	0.6814	0.683843	0.682621	2
FYB1	5p13.1	0.681006	8.64417e-132	9.68628e-129		ICOS	2q33.2	0.679296	1.67969e-111	1.87948e-108		FYB1	0.681006	0.683449	0.682228	2
GBP1P1	1p22.2	0.677194	8.67215e-130	9.20617e-127		TFEC	7q31.2	0.678689	3.13147e-111	3.31953e-108		GBP1P1	0.677194	0.673468	0.675331	2
LCP2	5q35.1	0.676291	2.55889e-129	2.58064e-126		STAT1	2q32.2	0.677694	8.67227e-111	8.73341e-108		LCP2	0.676291	0.680377	0.678334	2
PARP14	3q21.1	0.674523	2.10324e-128	2.02011e-125		PLEK	2p14	0.677587	9.6789e-111	9.28299e-108		PARP14	0.674523	0.663122	0.668822	2
TFEC	7q31.2	0.671945	4.41388e-127	4.04672e-124		GVINP1	11p15.4	0.67645	3.08134e-110	2.82097e-107		TFEC	0.671945	0.678689	0.675317	2
GPR174	Xq21.1	0.671419	8.18722e-127	7.17984e-124		GPR174	Xq21.1	0.674142	3.18669e-109	2.79057e-106		GPR174	0.671419	0.674142	0.67278	2
GVINP1	11p15.4	0.671291	9.51084e-127	7.99307e-124		GBP1P1	1p22.2	0.673468	6.27531e-109	5.26629e-106		GVINP1	0.671291	0.67645	0.673871	2
ICOS	2q33.2	0.671048	1.26437e-126	1.02009e-123		KLHL6	3q27.1	0.672861	1.15406e-108	9.29761e-106		ICOS	0.671048	0.679296	0.675172	2
PLEK	2p14	0.670961	1.39965e-126	1.08581e-123		NLRC5	16q13	0.666987	3.88994e-106	3.01336e-103		PLEK	0.670961	0.677587	0.674274	2
EPSTI1	13q14.11	0.669919	4.73003e-126	3.5335e-123		EPSTI1	13q14.11	0.666173	8.62404e-106	6.43322e-103		EPSTI1	0.669919	0.666173	0.668046	2
SAMD9L	7q21.2	0.664724	1.89969e-123	1.36846e-120		TLR8	Xp22.2	0.663413	1.25829e-104	9.05116e-102		SAMD9L	0.664724	0.656564	0.660644	2
IKZF1	7p12.2	0.657211	8.96983e-120	6.23867e-117		CXCR6	3p21.31	0.663334	1.35766e-104	9.4292e-102		IKZF1	0.657211	0.65838	0.657795	2
TIGIT	3q13.31	0.656674	1.62709e-119	1.09395e-116		PARP14	3q21.1	0.663122	1.66676e-104	1.11901e-101		TIGIT	0.656674	0.662451	0.659562	2
PIK3CG	7q22.3	0.656537	1.89208e-119	1.23107e-116		PIK3CG	7q22.3	0.662816	2.2374e-104	1.45366e-101		PIK3CG	0.656537	0.662816	0.659677	2
NLRC5	16q13	0.656424	2.14542e-119	1.35228e-116		TIGIT	3q13.31	0.662451	3.18097e-104	2.00212e-101		NLRC5	0.656424	0.666987	0.661705	2
TLR8	Xp22.2	0.656281	2.51146e-119	1.53503e-116		PARP15	3q21.1	0.660895	1.41581e-103	8.64117e-101		TLR8	0.656281	0.663413	0.659847	2
KLHL6	3q27.1	0.65608	3.13953e-119	1.86248e-116		LAX1	1q32.1	0.659258	6.74525e-103	3.88726e-100		KLHL6	0.65608	0.672861	0.66447	2
CD84	1q23.3	0.655633	5.13943e-119	2.96178e-116		DOCK2	5q35.1	0.659256	6.75509e-103	3.88726e-100		CD84	0.655633	0.656506	0.65607	2
CXCR6	3p21.31	0.65213	2.38878e-117	1.33838e-114		IKZF1	7p12.2	0.65838	1.55212e-102	8.6837e-100		CXCR6	0.65213	0.663334	0.657732	2
CCR8	3p22.1	0.651322	5.74704e-117	3.13291e-114		IL2RA	10p15.1	0.658251	1.75424e-102	9.54924e-100		CCR8	0.651322	0.642274	0.646798	2
CXCL10	4q21.1	0.651256	6.17253e-117	3.24569e-114		BTN3A1	6p22.2	0.657117	5.1183e-102	2.71283e-99		CXCL10	0.651256	0.648544	0.6499	2
DOCK2	5q35.1	0.651241	6.27575e-117	3.24569e-114		SLAMF1	1q23.3	0.65692	6.16657e-102	3.18464e-99		DOCK2	0.651241	0.659256	0.655249	2
LAX1	1q32.1	0.650701	1.12674e-116	5.68161e-114		SAMD9L	7q21.2	0.656564	8.619e-102	4.33988e-99		LAX1	0.650701	0.659258	0.654979	2
IL2RA	10p15.1	0.650393	1.57282e-116	7.73752e-114		CD84	1q23.3	0.656506	9.10481e-102	4.47268e-99		IL2RA	0.650393	0.658251	0.654322	2
SP140	2q37.1	0.649236	5.47854e-116	2.631e-113		CD96	3q13.13-q13.2	0.65548	2.38601e-101	1.14421e-98		SP140	0.649236	0.653524	0.65138	2
CD96	3q13.13-q13.2	0.648383	1.37068e-115	6.42946e-113		PTAFR	1p35.3	0.655034	3.62015e-101	1.69566e-98		CD96	0.648383	0.65548	0.651931	2
AIM2	1q23.1-q23.2	0.648161	1.74006e-115	7.97658e-113		NCKAP1L	12q13.13-q13.2	0.653998	9.52455e-101	4.35986e-98		AIM2	0.648161	0.648358	0.648259	2
PARP15	3q21.1	0.64737	4.05601e-115	1.81799e-112		SP140	2q37.1	0.653524	1.48165e-100	6.63153e-98		PARP15	0.64737	0.660895	0.654133	2
PTAFR	1p35.3	0.647348	4.1531e-115	1.82104e-112		CYBB	Xp21.1-p11.4	0.653352	1.73745e-100	7.60741e-98		PTAFR	0.647348	0.655034	0.651191	2
NCKAP1L	12q13.13-q13.2	0.647279	4.47312e-115	1.91963e-112		ITK	5q33.3	0.653049	2.30195e-100	9.86458e-98		NCKAP1L	0.647279	0.653998	0.650638	2
CD80	3q13.33	0.646774	7.67195e-115	3.22382e-112		CXCL11	4q21.1	0.651408	1.05154e-99	4.41232e-97		CD80	0.646774	0.646372	0.646573	2
ITK	5q33.3	0.64646	1.07199e-114	4.41265e-112		CXCL10	4q21.1	0.648544	1.45556e-98	5.98294e-96		ITK	0.64646	0.653049	0.649755	2
CXCL11	4q21.1	0.64627	1.31173e-114	5.2915e-112		AIM2	1q23.1-q23.2	0.648358	1.72612e-98	6.95317e-96		CXCL11	0.64627	0.651408	0.648839	2
CYBB	Xp21.1-p11.4	0.644102	1.3068e-113	5.16829e-111		PIK3AP1	10q24.1	0.647524	3.68789e-98	1.45643e-95		CYBB	0.644102	0.653352	0.648727	2
SLAMF1	1q23.3	0.644013	1.43662e-113	5.57242e-111		CD80	3q13.33	0.646372	1.04852e-97	4.06118e-95		SLAMF1	0.644013	0.65692	0.650466	2
BTN3A1	6p22.2	0.642765	5.34806e-113	2.03529e-110		KCNA3	1p13.3	0.645875	1.64348e-97	6.24555e-95		BTN3A1	0.642765	0.657117	0.649941	2
PIK3AP1	10q24.1	0.642127	1.04432e-112	3.90074e-110		MARCH1	4q32.2-q32.3	0.645679	1.96212e-97	7.31835e-95		PIK3AP1	0.642127	0.647524	0.644826	2
KCNA3	1p13.3	0.640905	3.75036e-112	1.37536e-109		SLAMF7	1q23.3	0.645252	2.88527e-97	1.05659e-94		KCNA3	0.640905	0.645875	0.64339	2
CTSS	1q21.3	0.637414	1.39955e-110	5.04088e-108		CCR8	3p22.1	0.642274	4.1647e-96	1.49788e-93		CTSS	0.637414	0.639101	0.638257	2
IDO1	8p11.21	0.6369	2.37547e-110	8.40584e-108		CD53	1p13.3	0.642055	5.05997e-96	1.78794e-93		IDO1	0.6369	0.639657	0.638279	2
CD53	1p13.3	0.634687	2.28986e-109	7.96318e-107		IL7R	5p13.2	0.642007	5.28362e-96	1.83478e-93		CD53	0.634687	0.642055	0.638371	2
IL7R	5p13.2	0.634421	3.00094e-109	1.02591e-106		CCR4	3p22.3	0.641258	1.02855e-95	3.51118e-93		IL7R	0.634421	0.642007	0.638214	2
SAMSN1	21q11.2	0.633806	5.61065e-109	1.88611e-106		CFLAR	2q33.1	0.64077	1.58568e-95	5.32287e-93		SAMSN1	0.633806	0.637378	0.635592	2
SLAMF8	1q23.2	0.632901	1.40609e-108	4.64933e-106		SLAMF8	1q23.2	0.640446	2.11314e-95	6.97716e-93		SLAMF8	0.632901	0.640446	0.636673	2
CCR4	3p22.3	0.632539	2.02852e-108	6.59924e-106		IL2RB	22q12.3	0.639743	3.93322e-95	1.27773e-92		CCR4	0.632539	0.641258	0.636898	2
CD38	4p15.32	0.631212	7.7447e-108	2.47953e-105		IDO1	8p11.21	0.639657	4.24162e-95	1.35604e-92		CD38	0.631212	0.631632	0.631422	2
SLAMF7	1q23.3	0.630613	1.41341e-107	4.45446e-105		CTSS	1q21.3	0.639101	6.93076e-95	2.18113e-92		SLAMF7	0.630613	0.645252	0.637933	2
IL2RB	22q12.3	0.630004	2.60407e-107	8.08063e-105		TNIP3	4q27	0.638061	1.72899e-94	5.35747e-92		IL2RB	0.630004	0.639743	0.634874	2
FASLG	1q24.3	0.629264	5.46623e-107	1.67051e-104		SAMSN1	21q11.2	0.637378	3.14532e-94	9.59846e-92		FASLG	0.629264	0.637088	0.633176	2
MARCH1	4q32.2-q32.3	0.627034	5.02941e-106	1.51408e-103		FASLG	1q24.3	0.637088	4.05309e-94	1.21841e-91		MARCH1	0.627034	0.645679	0.636357	2
TNIP3	4q27	0.626903	5.72889e-106	1.69929e-103		PRKCB	16p12.2-p12.1	0.634428	4.10473e-93	1.21579e-90		TNIP3	0.626903	0.638061	0.632482	2
BIRC3	11q22.2	0.626368	9.7323e-106	2.84493e-103		TAGAP	6q25.3	0.633141	1.24753e-92	3.64153e-90		BIRC3	0.626368	0.623657	0.625012	2
SPN	16p11.2	0.625862	1.60477e-105	4.62402e-103		CXCL9	4q21.1	0.632741	1.76029e-92	5.06486e-90		SPN	0.625862	0.631181	0.628522	2
SLA2	20q11.23	0.625117	3.34279e-105	9.49636e-103		IL12RB1	19p13.11	0.63193	3.53353e-92	1.00238e-89		SLA2	0.625117	0.630596	0.627857	2
PRKCB	16p12.2-p12.1	0.624883	4.21066e-105	1.17957e-102		CD38	4p15.32	0.631632	4.56155e-92	1.27603e-89		PRKCB	0.624883	0.634428	0.629655	2
FGL2	7q11.23	0.624397	6.78858e-105	1.8757e-102		SPN	16p11.2	0.631181	6.71072e-92	1.85152e-89		FGL2	0.624397	0.629619	0.627008	2
CCR2	3p21.31	0.623789	1.23184e-104	3.3576e-102		IKZF3	17q12-q21.1	0.630727	9.89487e-92	2.69314e-89		CCR2	0.623789	0.630637	0.627213	2
TAGAP	6q25.3	0.623599	1.48478e-104	3.99307e-102		CCR2	3p21.31	0.630637	1.06889e-91	2.87046e-89		TAGAP	0.623599	0.633141	0.62837	2
IL12RB1	19p13.11	0.62262	3.86427e-104	1.02556e-101		SLA2	20q11.23	0.630596	1.10632e-91	2.93188e-89		IL12RB1	0.62262	0.63193	0.627275	2
CXCL9	4q21.1	0.621926	7.60242e-104	1.99144e-101		FGL2	7q11.23	0.629619	2.5438e-91	6.65385e-89		CXCL9	0.621926	0.632741	0.627333	2
CFLAR	2q33.1	0.621855	8.14079e-104	2.10513e-101		CIITA	16p13.13	0.628729	5.41838e-91	1.39912e-88		CFLAR	0.621855	0.64077	0.631313	2
EVI2B	17q11.2	0.621794	8.63852e-104	2.20556e-101		BTN3A3	6p22.2	0.628264	8.03313e-91	2.04804e-88		EVI2B	0.621794	0.626621	0.624208	2
CD86	3q13.33	0.621296	1.40263e-103	3.53639e-101		B2M	15q21.1	0.627682	1.31406e-90	3.30831e-88		CD86	0.621296	0.626584	0.62394	2
IKZF3	17q12-q21.1	0.620075	4.5761e-103	1.13951e-100		IL21R	16p12.1	0.62702	2.29735e-90	5.71247e-88		IKZF3	0.620075	0.630727	0.625401	2
FPR3	19q13.41	0.619703	6.55563e-103	1.61253e-100		EVI2B	17q11.2	0.626621	3.21558e-90	7.89817e-88		FPR3	0.619703	0.620623	0.620163	2
BTN3A3	6p22.2	0.619273	9.92352e-103	2.41154e-100		CD86	3q13.33	0.626584	3.31788e-90	8.05125e-88		BTN3A3	0.619273	0.628264	0.623769	2
B2M	15q21.1	0.618273	2.59903e-102	6.24076e-100		STAT4	2q32.2-q32.3	0.626554	3.40219e-90	8.15757e-88		B2M	0.618273	0.627682	0.622978	2
CIITA	16p13.13	0.617642	4.759e-102	1.12928e-99		IL10RA	11q23.3	0.626228	4.47447e-90	1.06024e-87		CIITA	0.617642	0.628729	0.623186	2
TNFAIP3	6q23.3	0.617197	7.28805e-102	1.7093e-99		SCIMP	17p13.2	0.624305	2.23901e-89	5.24371e-87		TNFAIP3	0.617197	0.623952	0.620575	2
SCIMP	17p13.2	0.616506	1.41047e-101	3.27002e-99		TNFAIP3	6q23.3	0.623952	3.00367e-89	6.95366e-87		SCIMP	0.616506	0.624305	0.620405	2
PYHIN1	1q23.1	0.614795	7.18086e-101	1.64589e-98		BIRC3	11q22.2	0.623657	3.84187e-89	8.79308e-87		PYHIN1	0.614795	0.618743	0.616769	2
ZBED2	3q13.13	0.612744	4.9892e-100	1.1307e-97		PTPN7	1q32.1	0.623398	4.76486e-89	1.0783e-86		ZBED2	0.612744	0.620579	0.616662	2
PTPN7	1q32.1	0.611979	1.024e-99	2.2949e-97		FPR3	19q13.41	0.620623	4.73481e-88	1.0596e-85		PTPN7	0.611979	0.623398	0.617689	2
IL10RA	11q23.3	0.6103	4.93404e-99	1.09362e-96		ZBED2	3q13.13	0.620579	4.90851e-88	1.0864e-85		IL10RA	0.6103	0.626228	0.618264	2
IRF1	5q31.1	0.609742	8.29567e-99	1.81874e-96		HLA-DMB	6p21.32	0.6199	8.57759e-88	1.87784e-85		IRF1	0.609742	0.615796	0.612769	2
CCR1	3p21.31	0.609008	1.64332e-98	3.56405e-96		PYHIN1	1q23.1	0.618743	2.21329e-87	4.79331e-85		CCR1	0.609008		0.609008	1
IL21R	16p12.1	0.608863	1.87994e-98	4.03387e-96		CSF2RB	22q12.3	0.618435	2.84815e-87	6.10262e-85		IL21R	0.608863	0.62702	0.617941	2
CXORF21	Xp21.2	0.60785	4.80787e-98	1.02079e-95		WIPF1	2q31.1	0.617749	4.98262e-87	1.05637e-84		CXORF21	0.60785		0.60785	1
HLA-DMB	6p21.32	0.607788	5.08898e-98	1.06922e-95		LILRB1	19q13.42	0.617006	9.11937e-87	1.91326e-84		HLA-DMB	0.607788	0.6199	0.613844	2
STAT4	2q32.2-q32.3	0.606829	1.23398e-97	2.56591e-95		BIN2	12q13.13	0.616422	1.46543e-86	3.04281e-84		STAT4	0.606829	0.626554	0.616691	2
SLAMF6	1q23.2-q23.3	0.606795	1.27297e-97	2.61997e-95		IRF1	5q31.1	0.615796	2.43346e-86	5.00125e-84		SLAMF6	0.606795		0.606795	1
THEMIS	6q22.33	0.606152	2.30132e-97	4.68865e-95		CTLA4	2q33.2	0.61517	4.03569e-86	8.2104e-84		THEMIS	0.606152		0.606152	1
MNDA	1q23.1	0.605902	2.89679e-97	5.84283e-95		SH2D1A	Xq25	0.614803	5.42756e-86	1.09317e-83		MNDA	0.605902		0.605902	1
												CSF2RB		0.618435	0.618435	1
												WIPF1		0.617749	0.617749	1
												LILRB1		0.617006	0.617006	1
												BIN2		0.616422	0.616422	1
												CTLA4		0.61517	0.61517	1
												SH2D1A		0.614803	0.614803	1

## Sheet: Colorectal
Colorectal Adenocarcinoma (TCGA, Firehose Legacy)	7 Patients/Samples				One Study, Positive and Negative Available
Correlated Gene	Cytoband	Spearman's Correlation	p-Value	q-Value	Number
ABCD2	12q12	1	0	0	1
ADAP2	17q11.2	1	0	0	1
APBB1IP	10p12.1	1	0	0	1
APOL3	22q12.3	1	0	0	1
C16ORF54	16p11.2	1	0	0	1
C19ORF38	19p13.2	1	0	0	1
SHFL	19p13.2	1	0	0	1
C1QA	1p36.12	1	0	0	1
C1QB	1p36.12	1	0	0	1
C5ORF56	5q31.1	1	0	0	1
CASP10	2q33.1	1	0	0	1
CCL4L1	17q12	1	0	0	1
CCR5	3p21.31	1	0	0	1
CD2	1p13.1	1	0	0	1
CD247	1q24.2	1	0	0	1
CD27	12p13.31	1	0	0	1
CD3E	11q23.3	1	0	0	1
CD3G	11q23.3	1	0	0	1
CD52	1p36.11	1	0	0	1
CD53	1p13.3	1	0	0	1
CD8A	2p11.2	1	0	0	1
CYTH4	22q13.1	1	0	0	1
CYTIP	2q24.1	1	0	0	1
DGCR6	22q11.21|22q11	1	0	0	1
EVI2B	17q11.2	1	0	0	1
FYB1	5p13.1	1	0	0	1
GBP5	1p22.2	1	0	0	1
GFI1	1p22.1	1	0	0	1
GPR18	13q32.3	1	0	0	1
GZMK	5q11.2	1	0	0	1
GZMM	19p13.3	1	0	0	1
HAPLN3	15q26.1	1	0	0	1
HCLS1	3q13.33	1	0	0	1
HCST	19q13.12	1	0	0	1
IFI30	19p13.11	1	0	0	1
IL18BP	11q13.4	1	0	0	1
IL21R	16p12.1	1	0	0	1
IL2RB	22q12.3	1	0	0	1
KLRD1	12p13.2	1	0	0	1
KRT86	12q13.13	1	0	0	1
LCK	1p35.2	1	0	0	1
LCP2	5q35.1	1	0	0	1
LILRB4	19q13.42	1	0	0	1
LTK	15q15.1	1	0	0	1
MAP4K1	19q13.2	1	0	0	1
MIR31HG	9p21.3	1	0	0	1
NCF1	7q11.23	1	0	0	1
NTN4	12q22	1	0	0	1
P2RY6	11q13.4	1	0	0	1
PSTPIP1	15q24.3	1	0	0	1
PTPN7	1q32.1	1	0	0	1
RASAL3	19p13.12	1	0	0	1
RGS10	10q26.11	1	0	0	1
RPS2P32	7p15.3	1	0	0	1
SEPTIN1	16p11.2	1	0	0	1
SH2D1A	Xq25	1	0	0	1
SIGLEC10	19q13.41	1	0	0	1
SIRPG	20p13	1	0	0	1
SLA	8q24.22	1	0	0	1
SLA2	20q11.23	1	0	0	1
TCAF2	7q35	1	0	0	1
THEMIS	6q22.33	1	0	0	1
TNFRSF18	1p36.33	1	0	0	1
TRAT1	3q13.13	1	0	0	1
XCL1	1q24.2	1	0	0	1
ZBED2	3q13.13	1	0	0	1
ZNF831	20q13.32	1	0	0	1
HMSD	18q22.1	0.991031	1.45613e-05	0.00368911	1
NME8	7p14.1	0.991031	1.45613e-05	0.00368911	1
SSTR3	22q13.1	0.991031	1.45613e-05	0.00368911	1
SUMO1P1	20q13.2	0.991031	1.45613e-05	0.00368911	1
ABI3	17q21.32	0.964286	0.000454149	0.0328741	1
ADGRE1	19p13.3-p13.2	0.964286	0.000454149	0.0328741	1
ADORA2A	22q11.23	0.964286	0.000454149	0.0328741	1
AIF1	6p21.33	0.964286	0.000454149	0.0328741	1
ALOX5AP	13q12.3	0.964286	0.000454149	0.0328741	1
AMN	14q32.32	0.964286	0.000454149	0.0328741	1
APOBEC3D	22q13.1	0.964286	0.000454149	0.0328741	1
APOBEC3H	22q13.1	0.964286	0.000454149	0.0328741	1
APOL4	22q12.3	0.964286	0.000454149	0.0328741	1
ARHGAP15	2q22.2-q22.3	0.964286	0.000454149	0.0328741	1
ARHGAP25	2p13.3	0.964286	0.000454149	0.0328741	1
ARHGAP30	1q23.3	0.964286	0.000454149	0.0328741	1
ARHGAP9	12q13.3	0.964286	0.000454149	0.0328741	1
ASGR2	17p13.1	0.964286	0.000454149	0.0328741	1
ATP8B4	15q21.2	0.964286	0.000454149	0.0328741	1
BIRC3	11q22.2	0.964286	0.000454149	0.0328741	1
BMS1P20	22q11.22	0.964286	0.000454149	0.0328741	1
C1QC	1p36.12	0.964286	0.000454149	0.0328741	1
C2ORF74	2p15	0.964286	0.000454149	0.0328741	1
C3AR1	12p13.31	0.964286	0.000454149	0.0328741	1
C9ORF139	9q34.3	0.964286	0.000454149	0.0328741	1
CATSPERB	14q32.12	0.964286	0.000454149	0.0328741	1
CCL28	5p12	0.964286	0.000454149	0.0328741	1
CD226	18q22.2	0.964286	0.000454149	0.0328741	1
CD244	1q23.3	0.964286	0.000454149	0.0328741	1
CD300LF	17q25.1	0.964286	0.000454149	0.0328741	1
CD38	4p15.32	0.964286	0.000454149	0.0328741	1
CD3D	11q23.3	0.964286	0.000454149	0.0328741	1
CD4	12p13.31	0.964286	0.000454149	0.0328741	1
SLC35D1	1p31.3	-0.857143	0.0136973	0.256541	1
SLC45A3	1q32.1	-0.857143	0.0136973	0.256541	1
SSRP1	11q12.1	-0.857143	0.0136973	0.256541	1
TARS2	1q21.2	-0.857143	0.0136973	0.256541	1
TCEAL8	Xq22.1	-0.857143	0.0136973	0.256541	1
TDGF1	3p21.31	-0.857143	0.0136973	0.256541	1
TGFBI	5q31.1	-0.857143	0.0136973	0.256541	1
THSD4	15q23	-0.857143	0.0136973	0.256541	1
WIPI1	17q24.2	-0.857143	0.0136973	0.256541	1
ZDHHC9	Xq26.1	-0.857143	0.0136973	0.256541	1
ZNF513	2p23.3	-0.857143	0.0136973	0.256541	1
ZNF703	8p11.23	-0.857143	0.0136973	0.256541	1
CPNE2	16q13	-0.857143	0.0136973	0.256541	1
TLCD4	1p21.3	-0.857143	0.0136973	0.256541	1
FSD2	15q25.2	-0.866921	0.0115355	0.256541	1
SLED1	4q35.1	-0.866921	0.0115355	0.256541	1
TEX38	1p33	-0.866921	0.0115355	0.256541	1
TRH	3q22.1	-0.866921	0.0115355	0.256541	1
OOEP	6q13	-0.882919	0.00845034	0.242243	1
ACADSB	10q26.13	-0.892857	0.00680719	0.197556	1
ALG1	16p13.3	-0.892857	0.00680719	0.197556	1
ARHGEF40	14q11.2	-0.892857	0.00680719	0.197556	1
GATD3A	21q22.3	-0.892857	0.00680719	0.197556	1
COQ9	16q21	-0.892857	0.00680719	0.197556	1
CPA6	8q13.2	-0.892857	0.00680719	0.197556	1
DNASE1	16p13.3	-0.892857	0.00680719	0.197556	1
EIF3CL	16p12.1	-0.892857	0.00680719	0.197556	1
FGFBP1	4p15.32	-0.892857	0.00680719	0.197556	1
GMPR	6p22.3	-0.892857	0.00680719	0.197556	1
GRIN2B	12p13.1	-0.892857	0.00680719	0.197556	1
HMGN5	Xq21.1	-0.892857	0.00680719	0.197556	1
ICK	6p12.1	-0.892857	0.00680719	0.197556	1
KIAA1549	7q34	-0.892857	0.00680719	0.197556	1
LRPPRC	2p21	-0.892857	0.00680719	0.197556	1
LRRC36	16q22.1	-0.892857	0.00680719	0.197556	1
LRRC8D	1p22.2	-0.892857	0.00680719	0.197556	1
MAPK9	5q35.3	-0.892857	0.00680719	0.197556	1
NOX5	15q23	-0.892857	0.00680719	0.197556	1
PEBP1	12q24.23	-0.892857	0.00680719	0.197556	1
PPP2R2C	4p16.1	-0.892857	0.00680719	0.197556	1
PTPRB	12q15	-0.892857	0.00680719	0.197556	1
REPS2	Xp22.2	-0.892857	0.00680719	0.197556	1
RNFT2	12q24.22	-0.892857	0.00680719	0.197556	1
RPL7	8q21.11	-0.892857	0.00680719	0.197556	1
RPS6KA6	Xq21.1	-0.892857	0.00680719	0.197556	1
SATB2-AS1	2q33.1	-0.892857	0.00680719	0.197556	1
SLC16A11	17p13.1	-0.892857	0.00680719	0.197556	1
ST3GAL4	11q24.2	-0.892857	0.00680719	0.197556	1
TMEM211	22q11.23	-0.892857	0.00680719	0.197556	1
DUS1L	17q25.3	-0.892857	0.00680719	0.197556	1
FAM131B	7q34	-0.892857	0.00680719	0.197556	1
LINC01002	19p13.3	-0.892857	0.00680719	0.197556	1
FH	1q43	-0.892857	0.00680719	0.197556	1
KLHDC10	7q32.2	-0.892857	0.00680719	0.197556	1
TTLL2	6q27	-0.892857	0.00680719	0.197556	1
MAGEA5	Xq28	-0.906327	0.00490163	0.197556	1
AKR1B15	7q33	-0.926562	0.00269748	0.118714	1
C2ORF70	2p23.3	-0.928571	0.00251947	0.112464	1
MKRN1	7q34	-0.928571	0.00251947	0.112464	1
NDUFA10	2q37.3	-0.928571	0.00251947	0.112464	1
PDE9A	21q22.3	-0.928571	0.00251947	0.112464	1
ATP23	12q14.1	-0.928571	0.00251947	0.112464	1
SELENOI	2p23.3	-0.928571	0.00251947	0.112464	1
FAH	15q25.1	-0.928571	0.00251947	0.112464	1
FGFR4	5q35.2	-0.928571	0.00251947	0.112464	1
FLYWCH2	16p13.3	-0.928571	0.00251947	0.112464	1
FXN	9q21.11	-0.928571	0.00251947	0.112464	1
GALNT6	12q13.13	-0.928571	0.00251947	0.112464	1
GFM1	3q25.32	-0.928571	0.00251947	0.112464	1
HADHA	2p23.3	-0.928571	0.00251947	0.112464	1
HCN1	5p12	-0.928571	0.00251947	0.112464	1
IMMT	2p11.2|2	-0.928571	0.00251947	0.112464	1
KCNH8	3p24.3	-0.928571	0.00251947	0.112464	1
PART1	5q12.1	-0.928571	0.00251947	0.112464	1
RIPPLY1	Xq22.3	-0.928571	0.00251947	0.112464	1
RNF43	17q22	-0.928571	0.00251947	0.112464	1
SMARCD2	17q23.3	-0.928571	0.00251947	0.112464	1
SMIM10L2A	Xq26.3	-0.928571	0.00251947	0.112464	1
TFCP2L1	2q14.2	-0.928571	0.00251947	0.112464	1
URB2	1q42.13	-0.928571	0.00251947	0.112464	1
WNK1	12p13.33	-0.928571	0.00251947	0.112464	1
KCNN4	19q13.31	-0.928571	0.00251947	0.112464	1
TBC1D14	4p16.1	-0.928571	0.00251947	0.112464	1
CC2D1A	19p13.12	-0.964286	0.000454149	0.0328741	1
HSPA9	5q31.2	-0.964286	0.000454149	0.0328741	1
ADGRA3	4p15.2	-0.964286	0.000454149	0.0328741	1
UTP25	1q32.2	-0.964286	0.000454149	0.0328741	1
EPHA1	7q34-q35	-0.964286	0.000454149	0.0328741	1
ETF1	5q31.2	-0.964286	0.000454149	0.0328741	1
TRMT9B	8p22	-0.964286	0.000454149	0.0328741	1
LRRC2	3p21.31	-0.964286	0.000454149	0.0328741	1
PCLO	7q21.11	-0.964286	0.000454149	0.0328741	1
PURB	7p13	-0.964286	0.000454149	0.0328741	1
RABEP2	16p11.2	-0.964286	0.000454149	0.0328741	1
RXFP4	1q22	-0.964286	0.000454149	0.0328741	1
SH3TC2	5q32	-0.964286	0.000454149	0.0328741	1
YTHDF1	20q13.33	-0.964286	0.000454149	0.0328741	1
AKAP1	17q22	-1	0	0	1
GPD2	2q24.1	-1	0	0	1
CARMIL3	14q11.2	-1	0	0	1

[truncated: 7 more sheets: Melanoma, Lung, Renal, Bladder, Mesothelioma, Summary Table (Positive), Summary Table (Negative)]
