# Supplementary material for: Molecular Mechanisms of PD-1 and PD-L1 Activity on a Pan-Cancer Basis: A Bioinformatic Exploratory Study
Source: Int J Mol Sci. 2021 May 22;22(11):5478. doi: 10.3390/ijms22115478 (PMC8196980; doi:10.3390/ijms22115478)
Supplement: Supplementary file 1 [file ijms-22-05478-s001.zip › File S2.xlsx]

## Sheet: Cervical
Cervical Squamous Cell Carcinoma and Endocervical Adenocarcinoma (TCGA, Firehose Legacy)	190 Patients/Samples
Correlated Gene	Cytoband	Spearman's Correlation	p-Value	q-Value
CD8A	2p11.2	0.878662	2.86644e-62	5.73604e-58
CD2	1p13.1	0.869783	1.41702e-59	1.4178e-55
GZMH	14q12	0.861149	3.86884e-57	2.58065e-53
LAG3	12p13.31	0.860562	5.58435e-57	2.79371e-53
TBX21	17q21.32	0.856911	5.29498e-56	2.11916e-52
SIRPG	20p13	0.856214	8.07635e-56	2.6936e-52
CD3D	11q23.3	0.855555	1.20157e-55	3.43494e-52
CXCR6	3p21.31	0.850648	2.17797e-54	5.44793e-51
TIGIT	3q13.31	0.850012	3.14476e-54	6.99221e-51
NKG7	19q13.41	0.844256	8.14072e-53	1.62904e-49
CD3E	11q23.3	0.838708	1.65734e-51	3.01501e-48
SIT1	9p13.3	0.83634	5.79721e-51	9.66733e-48
RASAL3	19p13.12	0.829702	1.74526e-49	2.68649e-46
SH2D1A	Xq25	0.824218	2.6054e-48	3.59255e-45
PTPN7	1q32.1	0.82415	2.69293e-48	3.59255e-45
CCR5	3p21.31	0.823583	3.54175e-48	4.42962e-45
CXCR3	Xq13.1	0.819892	2.05993e-47	2.42478e-44
GZMM	19p13.3	0.818221	4.51023e-47	5.01412e-44
CCL5	17q12	0.81806	4.86184e-47	5.12054e-44
ITGAL	16p11.2	0.81763	5.94044e-47	5.9437e-44
HCST	19q13.12	0.814038	3.09867e-46	2.95274e-43
SLA2	20q11.23	0.804265	2.32697e-44	2.11659e-41
CST7	20p11.21	0.804046	2.55591e-44	2.22375e-41
SEPTIN1	16p11.2	0.803619	3.06867e-44	2.55863e-41
ARHGAP9	12q13.3	0.802928	4.12176e-44	3.29923e-41
CTLA4	2q33.2	0.802284	5.42001e-44	4.17153e-41
WAS	Xp11.23	0.80199	6.13964e-44	4.55038e-41
JAKMIP1	4p16.1	0.799205	1.98e-43	1.41506e-40
CD48	1q23.3	0.797403	4.18337e-43	2.88667e-40
PSTPIP1	15q24.3	0.797025	4.88903e-43	3.26115e-40
PTPRCAP	11q13.2	0.796127	7.07016e-43	4.5639e-40
HAVCR2	5q33.3	0.795786	8.13047e-43	5.08434e-40
CD27	12p13.31	0.795417	9.45479e-43	5.73333e-40
ZAP70	2q11.2	0.793645	1.94277e-42	1.14344e-39
ACAP1	17p13.1	0.792201	3.47449e-42	1.98651e-39
FERMT3	11q13.1	0.790866	5.92393e-42	3.29288e-39
IFNG	12q15	0.789692	9.44069e-42	5.10588e-39
KLRK1	12p13.2	0.78834	1.60898e-41	8.47297e-39
CD3G	11q23.3	0.787529	2.21101e-41	1.13448e-38
UBASH3A	21q22.3	0.78658	3.20166e-41	1.60171e-38
TBC1D10C	11q13.2	0.786417	3.41081e-41	1.66472e-38
SLAMF6	1q23.2-q23.3	0.784755	6.48962e-41	3.05901e-38
GIMAP5	7q36.1	0.784722	6.57327e-41	3.05901e-38
SASH3	Xq26.1	0.783534	1.03729e-40	4.71757e-38
CRTAM	11q24.1	0.782678	1.43838e-40	6.39632e-38
CCL4	17q12	0.782241	1.69869e-40	7.38966e-38
CORO1A	16p11.2	0.781839	1.97918e-40	8.42666e-38
SP140	2q37.1	0.777989	8.40021e-40	3.50201e-37
CD5	11q12.2	0.777235	1.11125e-39	4.5382e-37
SLA	8q24.22	0.774237	3.34508e-39	1.33877e-36
IL12RB1	19p13.11	0.774144	3.46009e-39	1.35764e-36
CD96	3q13.13-q13.2	0.772973	5.29429e-39	2.03739e-36
PYHIN1	1q23.1	0.771423	9.26477e-39	3.49806e-36
PRF1	10q22.1	0.769607	1.77398e-38	6.5739e-36
IL21R	16p12.1	0.76837	2.7522e-38	1.00135e-35
CXCR2P1	2q35	0.76798	3.15978e-38	1.12911e-35
ZNF831	20q13.32	0.767	4.4629e-38	1.56679e-35
DOK2	8p21.3	0.763102	1.73331e-37	5.9802e-35
CD7	17q25.3	0.762768	1.94477e-37	6.59608e-35
CXCL13	4q21.1	0.761869	2.6485e-37	8.83318e-35
CD37	19q13.33	0.761767	2.74219e-37	8.99573e-35
IL2RG	Xq13.1	0.761302	3.21547e-37	1.03782e-34
LAPTM5	1p35.2	0.760387	4.39276e-37	1.39529e-34
FAM78A	9q34.13	0.758391	8.63457e-37	2.69979e-34
CD72	9p13.3	0.757437	1.18968e-36	3.6582e-34
ICOS	2q33.2	0.757395	1.20654e-36	3.6582e-34
TRAF3IP3	1q32.2	0.757334	1.23157e-36	3.67834e-34
KLRD1	12p13.2	0.754854	2.81405e-36	8.28116e-34
TRAT1	3q13.13	0.753968	3.77041e-36	1.09347e-33
C1QA	1p36.12	0.752657	5.80197e-36	1.65862e-33
NCKAP1L	12q13.13-q13.2	0.752509	6.09163e-36	1.7169e-33
FASLG	1q24.3	0.75245	6.21078e-36	1.72616e-33
ABI3	17q21.32	0.748891	1.972e-35	5.40572e-33
GZMB	14q12	0.748579	2.17978e-35	5.89454e-33
TNFRSF1B	1p36.22	0.748269	2.40774e-35	6.42418e-33
SLAMF8	1q23.2	0.747731	2.86173e-35	7.53501e-33
ARHGAP15	2q22.2-q22.3	0.747482	3.09849e-35	8.05246e-33
FCER1G	1q23.3	0.746082	4.84052e-35	1.24184e-32
LY9	1q23.3	0.746004	4.96309e-35	1.25717e-32
CD52	1p36.11	0.745454	5.90774e-35	1.47775e-32
IL10RA	11q23.3	0.745258	6.28585e-35	1.55292e-32
SAMD3	6q23.1	0.743993	9.36917e-35	2.28642e-32
LCP2	5q35.1	0.743943	9.5199e-35	2.29521e-32
IL18BP	11q13.4	0.741906	1.80094e-34	4.29032e-32
SPN	16p11.2	0.741857	1.82864e-34	4.30505e-32
MYO1F	19p13.2	0.741754	1.88838e-34	4.39399e-32
C1QB	1p36.12	0.741282	2.18723e-34	5.03087e-32
LCK	1p35.2	0.741147	2.28068e-34	5.18622e-32
PARVG	22q13.31	0.74078	2.55602e-34	5.74702e-32
APBB1IP	10p12.1	0.74068	2.63624e-34	5.86153e-32
LTA	6p21.33	0.740473	2.81028e-34	6.17983e-32
HLA-DPB1	6p21.32	0.739578	3.70606e-34	8.06109e-32
SLAMF1	1q23.3	0.739164	4.20916e-34	9.05694e-32
CTSW	11q13.1	0.738465	5.21786e-34	1.11079e-31
FCGR1A	1q21.2	0.737384	7.26346e-34	1.52999e-31
PCED1B-AS1	12q13.11	0.736612	9.18707e-34	1.91502e-31
GRAP2	22q13.1	0.736189	1.04492e-33	2.15565e-31
CXCL9	4q21.1	0.735596	1.2507e-33	2.55386e-31
CD53	1p13.3	0.735429	1.31521e-33	2.65845e-31
TESPA1	12q13.2	0.735322	1.35854e-33	2.71857e-31

## Sheet: Liver
Liver Hepatocellular Carcinoma (TCGA, Firehose Legacy)	360 Patients/Samples
Correlated Gene	Cytoband	Spearman's Correlation	p-Value	q-Value
SIRPG	20p13	0.82885	2.57018e-92	5.16245e-88
CD27	12p13.31	0.82435	1.7317e-90	1.73915e-86
PTPN7	1q32.1	0.803919	8.46815e-83	5.3615e-79
CD8A	2p11.2	0.803634	1.06771e-82	5.3615e-79
CD2	1p13.1	0.799188	3.79662e-81	1.52518e-77
CORO1A	16p11.2	0.793173	4.13755e-79	1.38511e-75
CD3E	11q23.3	0.792016	1.0021e-78	2.87545e-75
CTLA4	2q33.2	0.791566	1.41131e-78	3.20515e-75
LCK	1p35.2	0.791543	1.43614e-78	3.20515e-75
ACAP1	17p13.1	0.790684	2.75386e-78	5.5314e-75
CD6	11q12.2	0.789484	6.80605e-78	1.24278e-74
TIGIT	3q13.31	0.788917	1.04127e-77	1.74291e-74
CD3D	11q23.3	0.787331	3.39932e-77	5.25222e-74
SIT1	9p13.3	0.783775	4.6547e-76	6.67817e-73
ICOS	2q33.2	0.78231	1.34815e-75	1.80526e-72
MAP4K1	19q13.2	0.780444	5.16301e-75	6.48151e-72
PTPRCAP	11q13.2	0.77707	5.65701e-74	6.68393e-71
TBC1D10C	11q13.2	0.776468	8.63962e-74	9.64085e-71
PSTPIP1	15q24.3	0.773438	7.11323e-73	7.51981e-70
CARMIL2	16q22.1	0.772606	1.26174e-72	1.26716e-69
RHOH	4p14	0.768441	2.145e-71	2.05164e-68
ARHGAP9	12q13.3	0.767011	5.59676e-71	5.10984e-68
CD8B	2p11.2	0.763173	7.09659e-70	6.19749e-67
DUSP2	2q11.2	0.76257	1.05343e-69	8.81637e-67
MYO1G	7p13	0.761875	1.65802e-69	1.33212e-66
JAK3	19p13.11	0.760593	3.81061e-69	2.94384e-66
ZAP70	2q11.2	0.760202	4.90905e-69	3.65197e-66
CXCR6	3p21.31	0.758838	1.18138e-68	8.47474e-66
CXCR3	Xq13.1	0.757971	2.05834e-68	1.42565e-65
CD5	11q12.2	0.754527	1.82552e-67	1.22225e-64
SLAMF6	1q23.2-q23.3	0.753831	2.82552e-67	1.83076e-64
CCL5	17q12	0.753393	3.7154e-67	2.33211e-64
IL21R	16p12.1	0.751395	1.28786e-66	7.83876e-64
RAC2	22q13.1	0.749651	3.77509e-66	2.23019e-63
IL2RG	Xq13.1	0.747989	1.04327e-65	5.98718e-63
SH2D2A	1q23.1	0.746718	2.25795e-65	1.25981e-62
SLAMF7	1q23.3	0.74627	2.961e-65	1.60742e-62
HAPLN3	15q26.1	0.745417	4.9525e-65	2.61779e-62
ZBP1	20q13.31	0.745204	5.63026e-65	2.89973e-62
PIK3CD	1p36.22	0.745093	6.01532e-65	3.02059e-62
GBP5	1p22.2	0.743774	1.32624e-64	6.49729e-62
CCR5	3p21.31	0.743128	1.94954e-64	9.32345e-62
SH2D1A	Xq25	0.741472	5.2063e-64	2.43195e-61
UBASH3A	21q22.3	0.738441	3.08285e-63	1.40732e-60
TMC8	17q25.3	0.737329	5.8826e-63	2.62573e-60
IRF4	6p25.3	0.73634	1.04249e-62	4.55204e-60
RASAL3	19p13.12	0.736211	1.12323e-62	4.80025e-60
CD96	3q13.13-q13.2	0.73377	4.55515e-62	1.90614e-59
CD48	1q23.3	0.732221	1.09892e-61	4.50468e-59
DEF6	6p21.31	0.731396	1.75219e-61	7.03891e-59
ZBED2	3q13.13	0.730961	2.23884e-61	8.8175e-59
GPSM3	6p21.32	0.730899	2.3187e-61	8.95641e-59
SEMA4A	1q22	0.73008	3.67546e-61	1.39293e-58
CST7	20p11.21	0.729923	4.01198e-61	1.49231e-58
RUNX3	1p36.11	0.728662	8.1219e-61	2.96612e-58
SASH3	Xq26.1	0.727897	1.24295e-60	4.45819e-58
IPCEF1	6q25.2	0.727511	1.54036e-60	5.428e-58
CD52	1p36.11	0.727358	1.67701e-60	5.80764e-58
MEI1	22q13.2	0.725333	5.12459e-60	1.74462e-57
TESPA1	12q13.2	0.724558	7.83712e-60	2.60348e-57
FERMT3	11q13.1	0.724542	7.90663e-60	2.60348e-57
ASB2	14q32.12	0.724373	8.67337e-60	2.80989e-57
PYHIN1	1q23.1	0.722235	2.77859e-59	8.85886e-57
ZNF831	20q13.32	0.720987	5.4528e-59	1.71133e-56
MIR155HG	-	0.720953	5.55325e-59	1.71604e-56
SLA2	20q11.23	0.720891	5.74216e-59	1.74753e-56
POU2AF1	11q23.1	0.720248	8.11526e-59	2.43288e-56
PLA2G2D	1p36.12	0.718803	1.75967e-58	5.19775e-56
CYTIP	2q24.1	0.718481	2.08912e-58	6.08144e-56
TNFRSF18	1p36.33	0.715541	9.91227e-58	2.84426e-55
PRKCQ	10p15.1	0.715001	1.31699e-57	3.72578e-55
IKZF1	7p12.2	0.713859	2.39553e-57	6.68287e-55
MZB1	5q31.2	0.713591	2.75483e-57	7.57993e-55
GZMA	5q11.2	0.713536	2.83549e-57	7.69645e-55
CARD11	7p22.2	0.712815	4.12807e-57	1.10555e-54
ITK	5q33.3	0.712659	4.47569e-57	1.18288e-54
SELPLG	12q24.11	0.712442	5.01108e-57	1.30718e-54
LY9	1q23.3	0.71175	7.17201e-57	1.84688e-54
GZMK	5q11.2	0.71165	7.55386e-57	1.92059e-54
AIM2	1q23.1-q23.2	0.711342	8.86156e-57	2.22492e-54
SLAMF1	1q23.3	0.710465	1.39267e-56	3.44425e-54
LOC606724	16p11.2	0.710447	1.40609e-56	3.44425e-54
GZMM	19p13.3	0.710062	1.71385e-56	4.14751e-54
MIAT	22q12.1	0.70975	2.01189e-56	4.8108e-54
LIMD2	17q23.3	0.709668	2.09774e-56	4.95708e-54
LTA	6p21.33	0.707833	5.36117e-56	1.25214e-53
CALHM6	6q22.1	0.707372	6.77752e-56	1.56475e-53
RASGRP1	15q14	0.707241	7.24682e-56	1.65409e-53
FGD3	9q22.31	0.707157	7.56081e-56	1.70637e-53
CD37	19q13.33	0.706465	1.07395e-55	2.39682e-53
GPR132	14q32.33	0.706129	1.27307e-55	2.80998e-53
SEMA4D	9q22.2	0.705594	1.66732e-55	3.6402e-53
BMS1P20	22q11.22	0.705211	2.02248e-55	4.36812e-53
PARVG	22q13.31	0.704392	3.05302e-55	6.52373e-53
SYTL1	1p36.11	0.703829	4.04883e-55	8.5605e-53
CD79A	19q13.2	0.703663	4.39952e-55	9.20509e-53
CD70	19p13.3	0.701199	1.50004e-54	3.10616e-52
MCOLN2	1p22.3	0.700166	2.49957e-54	5.1231e-52
CD7	17q25.3	0.700042	2.65689e-54	5.39054e-52
CD247	1q24.2	0.698721	5.08711e-54	1.0218e-51

## Sheet: Ovarian
Ovarian Serous Cystadenocarcinoma (TCGA, Firehose Legacy)	182 Patients/Samples
Correlated Gene	Cytoband	Spearman's Correlation	p-Value	q-Value
PTPRCAP	11q13.2	0.777333	4.46468e-38	8.95749e-34
PRF1	10q22.1	0.771816	3.07564e-37	3.08533e-33
CD7	17q25.3	0.763649	4.85786e-36	3.15319e-32
CXCR6	3p21.31	0.762868	6.28657e-36	3.15319e-32
SIRPG	20p13	0.758818	2.35909e-35	9.46607e-32
TIGIT	3q13.31	0.755585	6.65539e-35	2.06194e-31
CD3E	11q23.3	0.75534	7.19413e-35	2.06194e-31
CD3D	11q23.3	0.751376	2.50606e-34	5.70176e-31
CXCR3	Xq13.1	0.751311	2.55774e-34	5.70176e-31
SLAMF6	1q23.2-q23.3	0.745653	1.45857e-33	2.92633e-30
GIMAP5	7q36.1	0.745269	1.63885e-33	2.98911e-30
CD2	1p13.1	0.742151	4.18661e-33	6.99966e-30
CD5	11q12.2	0.741282	5.42442e-33	8.37155e-30
GZMM	19p13.3	0.74085	6.16847e-33	8.83986e-30
CD8A	2p11.2	0.736186	2.42732e-32	3.24663e-29
GZMH	14q12	0.734685	3.74987e-32	4.7021e-29
NKG7	19q13.41	0.733805	4.83219e-32	5.67709e-29
CCL5	17q12	0.733622	5.09334e-32	5.67709e-29
TBX21	17q21.32	0.732526	6.97155e-32	7.36159e-29
CD247	1q24.2	0.731878	8.38904e-32	8.18242e-29
SLA2	20q11.23	0.731805	8.56456e-32	8.18242e-29
CTLA4	2q33.2	0.731636	8.9862e-32	8.19501e-29
IL2RB	22q12.3	0.731448	9.48172e-32	8.27095e-29
GZMA	5q11.2	0.72977	1.52559e-31	1.27533e-28
ICOS	2q33.2	0.727853	2.61495e-31	2.09855e-28
FASLG	1q24.3	0.727357	3.00393e-31	2.31799e-28
IL2RG	Xq13.1	0.723135	9.66425e-31	7.18125e-28
LCK	1p35.2	0.721317	1.58798e-30	1.13784e-27
ITK	5q33.3	0.713251	1.37151e-29	9.48851e-27
CD27	12p13.31	0.710539	2.78547e-29	1.86283e-26
GFI1	1p22.1	0.707944	5.44364e-29	3.52309e-26
ACAP1	17p13.1	0.706883	7.14519e-29	4.47981e-26
S1PR4	19p13.3	0.704005	1.48502e-28	9.02849e-26
IFNG	12q15	0.703726	1.59312e-28	9.34891e-26
FOXP3	Xp11.23	0.703633	1.63092e-28	9.34891e-26
SH2D1A	Xq25	0.70138	2.87133e-28	1.60021e-25
SLAMF1	1q23.3	0.699569	4.507e-28	2.44389e-25
UBASH3A	21q22.3	0.69831	6.15501e-28	3.24968e-25
GZMB	14q12	0.697867	6.86527e-28	3.47895e-25
CXCL9	4q21.1	0.697825	6.93605e-28	3.47895e-25
ZAP70	2q11.2	0.697588	7.35244e-28	3.59785e-25
IL21R	16p12.1	0.697141	8.20657e-28	3.9202e-25
PTPN7	1q32.1	0.696609	9.35082e-28	4.36292e-25
RAC2	22q13.1	0.695696	1.16891e-27	5.32996e-25
RHOH	4p14	0.69352	1.98364e-27	8.84393e-25
SIT1	9p13.3	0.691973	2.88065e-27	1.2564e-24
KLRK1	12p13.2	0.690189	4.41659e-27	1.88532e-24
CXCL13	4q21.1	0.689358	5.38247e-27	2.24976e-24
IL12RB1	19p13.11	0.687271	8.82459e-27	3.61322e-24
EOMES	3p24.1	0.68341	2.17835e-26	8.74087e-24
GZMK	5q11.2	0.678939	6.09793e-26	2.39888e-23
STAT4	2q32.2-q32.3	0.678231	7.16533e-26	2.76458e-23
CD8B	2p11.2	0.677226	9.00054e-26	3.40713e-23
GIMAP7	7q36.1	0.676522	1.05566e-25	3.92217e-23
LY9	1q23.3	0.675471	1.33792e-25	4.88048e-23
P2RY10	Xq21.1	0.674894	1.52314e-25	5.45692e-23
ABI3	17q21.32	0.670291	4.24235e-25	1.49323e-22
CD3G	11q23.3	0.66735	8.0854e-25	2.73371e-22
SLAMF8	1q23.2	0.667344	8.09593e-25	2.73371e-22
CD96	3q13.13-q13.2	0.667299	8.17537e-25	2.73371e-22
GRAP2	22q13.1	0.667163	8.42136e-25	2.7698e-22
THEMIS	6q22.33	0.666438	9.86079e-25	3.19092e-22
ZNF831	20q13.32	0.665962	1.09336e-24	3.48191e-22
DOK2	8p21.3	0.665518	1.20392e-24	3.77411e-22
LTA	6p21.33	0.664997	1.34739e-24	4.15887e-22
ITGAL	16p11.2	0.664489	1.50373e-24	4.57113e-22
GPR171	3q25.1	0.664296	1.56744e-24	4.69365e-22
RASAL3	19p13.12	0.663839	1.72967e-24	5.10329e-22
CD48	1q23.3	0.663678	1.79031e-24	5.20565e-22
SAMD3	6q23.1	0.657418	6.76829e-24	1.93989e-21
SLAMF7	1q23.3	0.657168	7.13223e-24	2.01541e-21
LAG3	12p13.31	0.656226	8.68777e-24	2.42087e-21
TRAT1	3q13.13	0.654412	1.26737e-23	3.48317e-21
BATF	14q24.3	0.654135	1.3425e-23	3.63981e-21
IL18RAP	2q12.1	0.653985	1.38484e-23	3.70453e-21
CCR5	3p21.31	0.653683	1.47421e-23	3.89173e-21
TESPA1	12q13.2	0.653158	1.6433e-23	4.28175e-21
ANKRD22	10q23.31	0.652537	1.86766e-23	4.80395e-21
LINC00426	13q12.3	0.652001	2.08569e-23	5.29685e-21
PYHIN1	1q23.1	0.651773	2.18586e-23	5.48186e-21
SASH3	Xq26.1	0.649938	3.18212e-23	7.88184e-21
CD244	1q23.3	0.649426	3.53238e-23	8.64271e-21
GIMAP1	7q36.1	0.645852	7.2797e-23	1.75967e-20
LCP2	5q35.1	0.645182	8.32721e-23	1.98892e-20
SLFN12L	17q12	0.643521	1.1605e-22	2.73918e-20
C1QA	1p36.12	0.642592	1.39596e-22	3.25666e-20
TRAF3IP3	1q32.2	0.639305	2.67064e-22	6.15874e-20
TYMP	22q13.33	0.637758	3.61402e-22	8.23957e-20
CCR7	17q21.2	0.63687	4.296e-22	9.68435e-20
GIMAP4	7q36.1	0.632355	1.02601e-21	2.28721e-19
ARHGAP9	12q13.3	0.631975	1.10311e-21	2.43206e-19
AIM2	1q23.1-q23.2	0.630972	1.33549e-21	2.91239e-19
IRF4	6p25.3	0.630618	1.42863e-21	3.082e-19
PCED1B-AS1	12q13.11	0.628506	2.13072e-21	4.54773e-19
PLA2G2D	1p36.12	0.627311	2.66793e-21	5.63438e-19
GMFG	19q13.2	0.626413	3.15699e-21	6.59777e-19
WAS	Xp11.23	0.626265	3.24519e-21	6.67593e-19
SNX20	16q12.1	0.62624	3.26094e-21	6.67593e-19
C1QB	1p36.12	0.625641	3.64646e-21	7.38978e-19
CTSW	11q13.1	0.62494	4.15589e-21	8.33796e-19

## Sheet: Eosophageal
Esophageal Carcinoma (TCGA, Firehose Legacy)	183 Patients/Samples
Correlated Gene	Cytoband	Spearman's Correlation	p-Value	q-Value
CD3D	11q23.3	0.892728	1.43454e-64	2.89948e-60
SIRPG	20p13	0.888254	4.69819e-63	4.07904e-59
CD2	1p13.1	0.887921	6.05438e-63	4.07904e-59
SIT1	9p13.3	0.884016	1.11815e-61	5.64999e-58
CD3E	11q23.3	0.874893	6.88806e-59	2.78443e-55
SLA2	20q11.23	0.871843	5.27859e-58	1.77818e-54
TBX21	17q21.32	0.8709	9.7964e-58	2.82864e-54
CD3G	11q23.3	0.86123	4.27802e-55	1.08084e-51
ITGAL	16p11.2	0.857119	4.93971e-54	1.10935e-50
ZAP70	2q11.2	0.855467	1.29283e-53	2.61306e-50
TIGIT	3q13.31	0.851597	1.17431e-52	2.15774e-49
PRF1	10q22.1	0.851359	1.34292e-52	2.26192e-49
CD8A	2p11.2	0.850368	2.33684e-52	3.63324e-49
ITK	5q33.3	0.849254	4.33601e-52	6.25995e-49
CXCR6	3p21.31	0.847963	8.81691e-52	1.18805e-48
SH2D1A	Xq25	0.844787	4.91944e-51	6.21448e-48
JAKMIP1	4p16.1	0.843837	8.16746e-51	9.71063e-48
FASLG	1q24.3	0.840028	6.02398e-50	6.76426e-47
ARHGAP9	12q13.3	0.838983	1.0325e-49	1.09836e-46
CD7	17q25.3	0.837158	2.62277e-49	2.65058e-46
LAG3	12p13.31	0.836727	3.26289e-49	3.14045e-46
IL21R	16p12.1	0.833968	1.30179e-48	1.19599e-45
RASAL3	19p13.12	0.832143	3.2063e-48	2.81764e-45
TBC1D10C	11q13.2	0.83073	6.39792e-48	5.38811e-45
CD48	1q23.3	0.8283	2.06688e-47	1.67103e-44
CTLA4	2q33.2	0.827467	3.07531e-47	2.3907e-44
CD96	3q13.13-q13.2	0.825752	6.92938e-47	5.18729e-44
SASH3	Xq26.1	0.824336	1.34581e-46	9.7148e-44
NKG7	19q13.41	0.822842	2.69419e-46	1.87776e-43
CCR5	3p21.31	0.822116	3.76687e-46	2.53786e-43
CD247	1q24.2	0.821716	4.52619e-46	2.95107e-43
CST7	20p11.21	0.819328	1.34448e-45	8.38933e-43
P2RY10	Xq21.1	0.819286	1.36972e-45	8.38933e-43
WAS	Xp11.23	0.818207	2.22761e-45	1.32425e-42
IL2RB	22q12.3	0.817945	2.50606e-45	1.44721e-42
IL12RB1	19p13.11	0.815674	6.89261e-45	3.86982e-42
ICOS	2q33.2	0.814091	1.38316e-44	7.5558e-42
GZMB	14q12	0.813582	1.7282e-44	9.19222e-42
PTPRC	1q31.3-q32.1	0.808734	1.39339e-43	7.22133e-41
UBASH3A	21q22.3	0.807589	2.26187e-43	1.14292e-40
TESPA1	12q13.2	0.804007	1.00754e-42	4.96692e-40
PTPRCAP	11q13.2	0.803874	1.06445e-42	5.12253e-40
PYHIN1	1q23.1	0.803602	1.19082e-42	5.5974e-40
SLAMF1	1q23.3	0.799723	5.78105e-42	2.6556e-39
TRAT1	3q13.13	0.799033	7.62698e-42	3.4257e-39
GPR174	Xq21.1	0.797296	1.52613e-41	6.70566e-39
CD226	18q22.2	0.793735	6.19607e-41	2.66458e-38
GPR25	1q32.1	0.788718	4.25848e-40	1.79317e-37
IDO1	8p11.21	0.787475	6.81092e-40	2.80943e-37
CXCL9	4q21.1	0.787048	7.99677e-40	3.23262e-37
GPR171	3q25.1	0.785601	1.37415e-39	5.44595e-37
IFNG	12q15	0.783775	2.7044e-39	1.05118e-36
CORO1A	16p11.2	0.783241	3.29257e-39	1.25565e-36
IKZF1	7p12.2	0.783137	3.42072e-39	1.28036e-36
CD6	11q12.2	0.782109	4.98755e-39	1.83288e-36
SLAMF6	1q23.2-q23.3	0.781543	6.13281e-39	2.21351e-36
GZMH	14q12	0.781263	6.79279e-39	2.39567e-36
CD53	1p13.3	0.78123	6.87456e-39	2.39567e-36
CXCR3	Xq13.1	0.780611	8.60869e-39	2.91444e-36
SLA	8q24.22	0.780598	8.65162e-39	2.91444e-36
MAP4K1	19q13.2	0.778017	2.19346e-38	7.2679e-36
SPN	16p11.2	0.775616	5.15367e-38	1.65607e-35
CD8B	2p11.2	0.775612	5.16191e-38	1.65607e-35
CD27	12p13.31	0.775193	5.98415e-38	1.88987e-35
ZNF831	20q13.32	0.77402	9.04071e-38	2.81124e-35
SAMSN1	21q11.2	0.772947	1.31584e-37	4.02966e-35
PTPN7	1q32.1	0.771573	2.12182e-37	6.40094e-35
GIMAP5	7q36.1	0.770188	3.42162e-37	1.01703e-34
KLRK1	12p13.2	0.769585	4.20992e-37	1.2332e-34
GRAP2	22q13.1	0.769033	5.08514e-37	1.4683e-34
ACAP1	17p13.1	0.766525	1.19254e-36	3.39488e-34
DOCK2	5q35.1	0.76601	1.41873e-36	3.98268e-34
GZMA	5q11.2	0.765054	1.95586e-36	5.41533e-34
CXCR2P1	2q35	0.764007	2.77551e-36	7.58089e-34
CYTIP	2q24.1	0.761715	5.93428e-36	1.59925e-33
SNX20	16q12.1	0.759906	1.07474e-35	2.85824e-33
THEMIS	6q22.33	0.758205	1.86987e-35	4.90829e-33
ABI3	17q21.32	0.75607	3.72124e-35	9.64279e-33
ARHGAP15	2q22.2-q22.3	0.75542	4.58259e-35	1.17245e-32
CD5	11q12.2	0.754521	6.1046e-35	1.54233e-32
LCP2	5q35.1	0.753609	8.15745e-35	2.03554e-32
IL10RA	11q23.3	0.753527	8.37287e-35	2.06381e-32
NLRC3	16p13.3	0.752418	1.18847e-34	2.89415e-32
BIN2	12q13.13	0.750681	2.05005e-34	4.93281e-32
EVI2B	17q11.2	0.74999	2.54362e-34	6.04842e-32
GPR65	14q31.3	0.749465	2.99485e-34	7.0386e-32
FOXP3	Xp11.23	0.74879	3.69332e-34	8.58039e-32
IRF4	6p25.3	0.748369	4.20733e-34	9.66347e-32
GVINP1	11p15.4	0.74794	4.80323e-34	1.09082e-31
TARP	7p14.1	0.747045	6.32818e-34	1.42117e-31
NCKAP1L	12q13.13-q13.2	0.74627	8.02599e-34	1.78265e-31
C11ORF21	11p15.5	0.744265	1.47829e-33	3.24774e-31
PRKCB	16p12.2-p12.1	0.743981	1.61155e-33	3.50244e-31
CCL5	17q12	0.743393	1.92495e-33	4.13905e-31
LINC00426	13q12.3	0.743281	1.99106e-33	4.23613e-31
GZMK	5q11.2	0.74287	2.25424e-33	4.74612e-31
GBP5	1p22.2	0.742448	2.55993e-33	5.33416e-31
EBI3	19p13.3	0.741713	3.1914e-33	6.54941e-31
IL18RAP	2q12.1	0.741696	3.20795e-33	6.54941e-31
FCRL3	1q23.1	0.741296	3.61579e-33	7.30824e-31

## Sheet: Pancreatic
Pancreatic Adenocarcinoma (TCGA, Firehose Legacy)	149 Patients/Samples
Correlated Gene	Cytoband	Spearman's Correlation	p-Value	q-Value
ACAP1	17p13.1	0.858026	2.22e-44	4.41e-40
MAP4K1	19q13.2	0.840668	5.45e-41	5.43e-37
ZAP70	2q11.2	0.827978	9.3e-39	6.18e-35
CD7	17q25.3	0.826312	1.77e-38	8.81e-35
SEPTIN1	16p11.2	0.822793	6.74e-38	2.68e-34
CD3E	11q23.3	0.818277	3.59e-37	1.19e-33
RASAL3	19p13.12	0.817413	4.91e-37	1.4e-33
EBI3	19p13.3	0.817011	5.69e-37	1.42e-33
SIRPG	20p13	0.814903	1.21e-36	2.69e-33
ARHGAP9	12q13.3	0.812458	2.9e-36	5.77e-33
SIT1	9p13.3	0.811696	3.79e-36	6.86e-33
TBC1D10C	11q13.2	0.810825	5.13e-36	8.52e-33
PTPRCAP	11q13.2	0.807285	1.74e-35	2.67e-32
CD3D	11q23.3	0.804647	4.27e-35	6.08e-32
STAT4	2q32.2-q32.3	0.802775	7.99e-35	1.06e-31
CD2	1p13.1	0.800668	1.61e-34	2e-31
CD247	1q24.2	0.795672	8.13e-34	9.52e-31
NLRC3	16p13.3	0.791301	3.24e-33	3.58e-30
GIMAP1	7q36.1	0.790227	4.52e-33	4.74e-30
CD27	12p13.31	0.789516	5.64e-33	5.62e-30
CORO1A	16p11.2	0.789331	5.97e-33	5.66e-30
CD48	1q23.3	0.786682	1.35e-32	1.22e-29
TBX21	17q21.32	0.786514	1.42e-32	1.23e-29
KLRK1	12p13.2	0.785935	1.69e-32	1.4e-29
ZNF831	20q13.32	0.781266	6.84e-32	5.28e-29
RTP5	2q37.3	0.781242	6.89e-32	5.28e-29
TRAF3IP3	1q32.2	0.779561	1.13e-31	8.35e-29
PYHIN1	1q23.1	0.778244	1.66e-31	1.18e-28
SLA2	20q11.23	0.776477	2.78e-31	1.91e-28
PTPN7	1q32.1	0.771003	1.32e-30	8.76e-28
CTLA4	2q33.2	0.770495	1.52e-30	9.77e-28
FAM78A	9q34.13	0.770314	1.6e-30	9.96e-28
SLAMF1	1q23.3	0.769799	1.85e-30	1.12e-27
GIMAP5	7q36.1	0.769617	1.94e-30	1.14e-27
GZMK	5q11.2	0.766425	4.7e-30	2.67e-27
SASH3	Xq26.1	0.764985	6.96e-30	3.78e-27
CD6	11q12.2	0.764956	7.02e-30	3.78e-27
HCLS1	3q13.33	0.763976	9.16e-30	4.8e-27
BTLA	3q13.2	0.763359	1.08e-29	5.53e-27
SH2D1A	Xq25	0.762819	1.25e-29	6.24e-27
GPR171	3q25.1	0.761187	1.94e-29	9.43e-27
NKG7	19q13.41	0.757359	5.35e-29	2.54e-26
CD8A	2p11.2	0.75712	5.69e-29	2.64e-26
IKZF1	7p12.2	0.755864	7.91e-29	3.58e-26
CCR7	17q21.2	0.753923	1.31e-28	5.79e-26
CXCR6	3p21.31	0.7515	2.44e-28	1.05e-25
P2RX5	17p13.2	0.751395	2.5e-28	1.06e-25
ITK	5q33.3	0.75121	2.62e-28	1.09e-25
CD96	3q13.13-q13.2	0.748757	4.88e-28	1.98e-25
WAS	Xp11.23	0.747785	6.23e-28	2.48e-25
GZMM	19p13.3	0.74747	6.74e-28	2.63e-25
CCL5	17q12	0.747263	7.1e-28	2.72e-25
ARHGAP15	2q22.2-q22.3	0.74597	9.8e-28	3.68e-25
TIGIT	3q13.31	0.743755	1.69e-27	6.25e-25
RHOH	4p14	0.742597	2.25e-27	8.16e-25
ITGAL	16p11.2	0.740649	3.62e-27	1.29e-24
LY9	1q23.3	0.740265	3.97e-27	1.39e-24
RASGRP2	11q13.1	0.737675	7.41e-27	2.54e-24
TESPA1	12q13.2	0.737257	8.18e-27	2.72e-24
PRKCB	16p12.2-p12.1	0.737247	8.21e-27	2.72e-24
ICOS	2q33.2	0.735462	1.25e-26	4.1e-24
LTA	6p21.33	0.734457	1.59e-26	5.11e-24
SP140	2q37.1	0.732766	2.37e-26	7.48e-24
RCSD1	1q24.2	0.732672	2.42e-26	7.53e-24
FCMR	1q32.1	0.728714	6.05e-26	1.86e-23
P2RY8	Xp22.33 and Yp11.2	0.727901	7.29e-26	2.2e-23
CD37	19q13.33	0.727753	7.55e-26	2.24e-23
SUSD3	9q22.31	0.727618	7.78e-26	2.28e-23
LINC00426	13q12.3	0.725968	1.13e-25	3.27e-23
RBP5	12p13.31	0.725775	1.18e-25	3.37e-23
SMAP2	1p34.2	0.725648	1.22e-25	3.42e-23
JAK3	19p13.11	0.725431	1.28e-25	3.54e-23
CD79B	17q23.3	0.724546	1.56e-25	4.27e-23
SCML4	6q21	0.724484	1.59e-25	4.27e-23
CD3G	11q23.3	0.723882	1.82e-25	4.82e-23
PLA2G2D	1p36.12	0.723204	2.11e-25	5.54e-23
GAB3	Xq28	0.720758	3.65e-25	9.44e-23
PSTPIP1	15q24.3	0.720167	4.16e-25	1.05e-22
KLHL6	3q27.1	0.720156	4.17e-25	1.05e-22
HCST	19q13.12	0.719851	4.46e-25	1.11e-22
CD40LG	Xq26.3	0.719267	5.07e-25	1.25e-22
TRAT1	3q13.13	0.718825	5.59e-25	1.36e-22
FCRL3	1q23.1	0.717855	6.92e-25	1.66e-22
MCOLN2	1p22.3	0.715483	1.16e-24	2.75e-22
ASB2	14q32.12	0.71425	1.51e-24	3.55e-22
AKNA	9q32	0.713601	1.74e-24	4.04e-22
CD5	11q12.2	0.709664	4.03e-24	9.18e-22
PRF1	10q22.1	0.709639	4.06e-24	9.18e-22
IRF4	6p25.3	0.708689	4.96e-24	1.11e-21
GPR18	13q32.3	0.708594	5.06e-24	1.11e-21
ADORA2A	22q11.23	0.708587	5.06e-24	1.11e-21
IL2RB	22q12.3	0.707593	6.24e-24	1.35e-21
GIMAP4	7q36.1	0.707136	6.87e-24	1.47e-21
CD72	9p13.3	0.706871	7.26e-24	1.54e-21
CYTIP	2q24.1	0.706653	7.6e-24	1.59e-21
ABI3	17q21.32	0.706251	8.26e-24	1.71e-21
TLR10	4p14	0.703693	1.4e-23	2.88e-21
BTK	Xq22.1	0.702177	1.92e-23	3.9e-21
CALHM6	6q22.1	0.701038	2.42e-23	4.87e-21
GVINP1	11p15.4	0.700577	2.66e-23	5.3e-21

## Sheet: Gastric
Stomach Adenocarcinoma (TCGA, Firehose Legacy)	369 Patients/Samples					Stomach Adenocarcinoma (TCGA, Nature 2014)	258 Patients/Samples
Correlated Gene	Cytoband	Spearman's Correlation	p-Value	q-Value		Correlated Gene	Cytoband	Spearman's Correlation	p-Value	q-Value		Gene	Number of Times Gene Appears	Study 1 Value	Study 2 Value	Average	Number of studies	Gene
IL21R	16p12.1	0.842568	1.16172e-100	2.34888e-96		IL21R	16p12.1	0.866159	4.40803e-79	9.98595e-75		IL21R	2	0.842568	0.866159	0.854363	2	IL21R
TIGIT	3q13.31	0.820788	2.84955e-91	2.88075e-87		IL21R-AS1	16p12.1	0.850852	1.63561e-73	1.85265e-69		TIGIT	2	0.820788	0.804497	0.812643	2	TIGIT
IL2RB	22q12.3	0.816226	1.82268e-89	1.22843e-85		IL2RB	22q12.3	0.82744	4.19821e-66	3.17021e-62		IL2RB	2	0.816226	0.82744	0.821833	2	IL2RB
SIRPG	20p13	0.812471	5.12514e-88	2.59063e-84		TBC1D10C	11q13.2	0.821273	2.45755e-64	1.39183e-60		SIRPG	2	0.812471	0.813777	0.813124	2	SIRPG
TBC1D10C	11q13.2	0.806317	1.03589e-85	4.18894e-82		SIT1	9p13.3	0.819034	1.03576e-63	4.69284e-60		TBC1D10C	2	0.806317	0.821273	0.813795	2	TBC1D10C
MAP4K1	19q13.2	0.805077	2.95022e-85	9.94175e-82		SIRPG	20p13	0.813777	2.81146e-62	1.06151e-58		MAP4K1	2	0.805077	0.806188	0.805632	2	MAP4K1
SIT1	9p13.3	0.802712	2.12554e-84	6.13948e-81		TBX21	17q21.32	0.807307	1.42055e-60	4.59731e-57		SIT1	2	0.802712	0.819034	0.810873	2	SIT1
ACAP1	17p13.1	0.798612	6.13006e-83	1.54929e-79		MAP4K1	19q13.2	0.806188	2.75768e-60	7.80905e-57		ACAP1	2	0.798612	0.794952	0.796782	2	ACAP1
TBX21	17q21.32	0.797992	1.01267e-82	2.27502e-79		TIGIT	3q13.31	0.804497	7.45043e-60	1.87536e-56		TBX21	2	0.797992	0.807307	0.802649	2	TBX21
SLA2	20q11.23	0.793019	5.31493e-81	1.07462e-77		IL12RB1	19p13.11	0.797517	4.08031e-58	9.24354e-55		SLA2	2	0.793019	0.763027	0.778023	2	SLA2
CD3E	11q23.3	0.792728	6.67683e-81	1.22726e-77		ACAP1	17p13.1	0.794952	1.70726e-57	3.51602e-54		CD3E	2	0.792728	0.787018	0.789873	2	CD3E
ZAP70	2q11.2	0.787931	2.73452e-79	4.60744e-76		CD6	11q12.2	0.793197	4.49335e-57	8.4827e-54		ZAP70	2	0.787931	0.792692	0.790312	2	ZAP70
CD8A	2p11.2	0.784886	2.74833e-78	4.2745e-75		ZAP70	2q11.2	0.792692	5.92629e-57	1.03273e-53		CD8A	2	0.784886	0.782272	0.783579	2	CD8A
CXCR6	3p21.31	0.782685	1.42289e-77	2.05496e-74		CD3E	11q23.3	0.787018	1.26095e-55	2.04039e-52		CXCR6	2	0.782685	0.768354	0.77552	2	CXCR6
CD6	11q12.2	0.782564	1.55675e-77	2.09839e-74		PRF1	10q22.1	0.783483	8.08675e-55	1.22132e-51		CD6	2	0.782564	0.793197	0.787881	2	CD6
PTPRCAP	11q13.2	0.780193	8.94979e-77	1.13097e-73		RASAL3	19p13.12	0.783307	8.86025e-55	1.2545e-51		PTPRCAP	2	0.780193	0.782387	0.78129	2	PTPRCAP
IL12RB1	19p13.11	0.774624	4.99939e-75	5.94604e-72		PTPRCAP	11q13.2	0.782387	1.42836e-54	1.90342e-51		IL12RB1	2	0.774624	0.797517	0.78607	2	IL12RB1
PRF1	10q22.1	0.773302	1.27768e-74	1.43519e-71		CD8A	2p11.2	0.782272	1.5158e-54	1.90772e-51		PRF1	2	0.773302	0.783483	0.778392	2	PRF1
SH2D1A	Xq25	0.771543	4.40857e-74	4.69142e-71		CD247	1q24.2	0.779257	7.12334e-54	8.49327e-51		SH2D1A	2	0.771543	0.743349	0.757446	2	SH2D1A
CD3D	11q23.3	0.771379	4.94484e-74	4.99898e-71		ITGAL	16p11.2	0.778653	9.683e-54	1.09679e-50		CD3D	2	0.771379	0.772286	0.771832	2	CD3D
CTLA4	2q33.2	0.77113	5.8857e-74	5.66681e-71		NKG7	19q13.41	0.774421	8.10526e-53	8.74365e-50		CTLA4	2	0.77113	0.734326	0.752728	2	CTLA4
CORO1A	16p11.2	0.770964	6.61218e-74	6.07689e-71		CD3D	11q23.3	0.772286	2.32685e-52	2.39602e-49		CORO1A	2	0.770964	0.770371	0.770667	2	CORO1A
CD247	1q24.2	0.769736	1.55539e-73	1.36732e-70		UBASH3A	21q22.3	0.772032	2.63592e-52	2.59626e-49		CD247	2	0.769736	0.779257	0.774497	2	CD247
ITGAL	16p11.2	0.768024	5.08162e-73	4.28106e-70		SEPTIN1	16p11.2	0.770645	5.19018e-52	4.8991e-49		ITGAL	2	0.768024	0.778653	0.773339	2	ITGAL
SEPTIN1	16p11.2	0.767716	6.28251e-73	5.08104e-70		CORO1A	16p11.2	0.770371	5.93181e-52	5.37517e-49		SEPTIN1	2	0.767716	0.770645	0.769181	2	SEPTIN1
LAG3	12p13.31	0.76745	7.54253e-73	5.86548e-70		LTA	6p21.33	0.770289	6.17328e-52	5.37883e-49		LAG3	2	0.76745	0.73583	0.75164	2	LAG3
NKG7	19q13.41	0.765483	2.89164e-72	2.16541e-69		CXCR6	3p21.31	0.768354	1.57404e-51	1.32068e-48		NKG7	2	0.765483	0.774421	0.769952	2	NKG7
CCL5	17q12	0.763668	9.87258e-72	7.12906e-69		ARHGAP9	12q13.3	0.766027	4.79597e-51	3.88028e-48		CCL5	2	0.763668	0.763955	0.763812	2	CCL5
RASAL3	19p13.12	0.762953	1.59641e-71	1.11303e-68		SASH3	Xq26.1	0.765709	5.57927e-51	4.21632e-48		RASAL3	2	0.762953	0.783307	0.77313	2	RASAL3
APOBEC3G	22q13.1	0.762728	1.85713e-71	1.25164e-68		MYO1G	7p13	0.765707	5.58354e-51	4.21632e-48		APOBEC3G	1	0.762728		0.762728	1	APOBEC3G
CD2	1p13.1	0.756343	1.25747e-69	8.20156e-67		CCL5	17q12	0.763955	1.27897e-50	9.34642e-48		CD2	2	0.756343	0.748589	0.752466	2	CD2
JAKMIP1	4p16.1	0.755997	1.57397e-69	9.94502e-67		SLA2	20q11.23	0.763027	1.97847e-50	1.40063e-47		JAKMIP1	2	0.755997	0.725028	0.740513	2	JAKMIP1
MYO1G	7p13	0.75299	1.09211e-68	6.6913e-66		PTPN7	1q32.1	0.762009	3.18433e-50	2.18599e-47		MYO1G	2	0.75299	0.765707	0.759349	2	MYO1G
UBASH3A	21q22.3	0.751868	2.23388e-68	1.32844e-65		SPN	16p11.2	0.758396	1.69219e-49	1.1275e-46		UBASH3A	2	0.751868	0.772032	0.76195	2	UBASH3A
ARHGAP9	12q13.3	0.751328	3.14772e-68	1.81839e-65		PSTPIP1	15q24.3	0.757084	3.08263e-49	1.99525e-46		ARHGAP9	2	0.751328	0.766027	0.758678	2	ARHGAP9
CD96	3q13.13-q13.2	0.74957	9.55884e-68	5.36862e-65		DOK2	8p21.3	0.756601	3.83997e-49	2.41641e-46		CD96	2	0.74957	0.727738	0.738654	2	CD96
PTPN7	1q32.1	0.749217	1.19357e-67	6.52237e-65		SNX20	16q12.1	0.753782	1.36967e-48	8.38607e-46		PTPN7	2	0.749217	0.762009	0.755613	2	PTPN7
CD27	12p13.31	0.748222	2.22625e-67	1.18454e-64		FAM78A	9q34.13	0.749398	9.57558e-48	5.70856e-45		CD27	2	0.748222	0.717048	0.732635	2	CD27
FASLG	1q24.3	0.747953	2.63438e-67	1.36576e-64		CD2	1p13.1	0.748589	1.36502e-47	7.929e-45		FASLG	2	0.747953	0.736549	0.742251	2	FASLG
SASH3	Xq26.1	0.747173	4.28232e-67	2.16461e-64		CCR5	3p21.31	0.74796	1.79576e-47	1.01703e-44		SASH3	2	0.747173	0.765709	0.756441	2	SASH3
GZMM	19p13.3	0.744606	2.09442e-66	1.03286e-63		CD7	17q25.3	0.745694	4.79713e-47	2.65059e-44		GZMM	2	0.744606	0.734075	0.739341	2	GZMM
ITK	5q33.3	0.742947	5.78433e-66	2.7846e-63		CD3G	11q23.3	0.745473	5.27722e-47	2.84643e-44		ITK	2	0.742947	0.72198	0.732463	2	ITK
LTA	6p21.33	0.742533	7.44254e-66	3.49955e-63		TTC24	1q22	0.745249	5.81291e-47	3.06246e-44		LTA	2	0.742533	0.770289	0.756411	2	LTA
SPN	16p11.2	0.739833	3.81155e-65	1.7515e-62		SH2D1A	Xq25	0.743349	1.31229e-46	6.75653e-44		SPN	2	0.739833	0.758396	0.749115	2	SPN
CRTAM	11q24.1	0.73878	7.16748e-65	3.22043e-62		CST7	20p11.21	0.741493	2.88596e-46	1.45286e-43		CRTAM	2	0.73878	0.723791	0.731286	2	CRTAM
PLA2G2D	1p36.12	0.737173	1.86855e-64	8.21307e-62		PLA2G2D	1p36.12	0.741281	3.15679e-46	1.55465e-43		PLA2G2D	2	0.737173	0.741281	0.739227	2	PLA2G2D
CCR5	3p21.31	0.736335	3.07069e-64	1.32098e-61		FASLG	1q24.3	0.736549	2.28174e-45	1.0998e-42		CCR5	2	0.736335	0.74796	0.742147	2	CCR5
TRAF3IP3	1q32.2	0.733865	1.31254e-63	5.5288e-61		LAG3	12p13.31	0.73583	3.07063e-45	1.44921e-42		TRAF3IP3	2	0.733865	0.727307	0.730586	2	TRAF3IP3
SLAMF6	1q23.2-q23.3	0.73347	1.65361e-63	6.82332e-61		ARHGAP30	1q23.3	0.734497	5.31056e-45	2.45521e-42		SLAMF6	2	0.73347	0.730894	0.732182	2	SLAMF6
WAS	Xp11.23	0.733358	1.76512e-63	7.13777e-61		CTLA4	2q33.2	0.734326	5.69458e-45	2.5801e-42		WAS	2	0.733358	0.731901	0.73263	2	WAS
PSTPIP1	15q24.3	0.733211	1.92414e-63	7.62827e-61		GZMM	19p13.3	0.734075	6.31002e-45	2.80289e-42		PSTPIP1	2	0.733211	0.757084	0.745147	2	PSTPIP1
CD3G	11q23.3	0.731214	6.13257e-63	2.38451e-60		WAS	Xp11.23	0.731901	1.52809e-44	6.65719e-42		CD3G	2	0.731214	0.745473	0.738344	2	CD3G
DOK2	8p21.3	0.731141	6.39804e-63	2.44079e-60		APOBEC3F	22q13.1	0.731623	1.71025e-44	7.31017e-42		DOK2	2	0.731141	0.756601	0.743871	2	DOK2
SNX20	16q12.1	0.730684	8.32905e-63	3.11861e-60		SLAMF6	1q23.2-q23.3	0.730894	2.29562e-44	9.63056e-42		SNX20	2	0.730684	0.753782	0.742233	2	SNX20
CST7	20p11.21	0.730119	1.15315e-62	4.23917e-60		GRAP2	22q13.1	0.729727	3.66917e-44	1.5113e-41		CST7	2	0.730119	0.741493	0.735806	2	CST7
LPXN	11q12.1	0.727671	4.67868e-62	1.68925e-59		CD96	3q13.13-q13.2	0.727738	8.11713e-44	3.28367e-41		LPXN	2	0.727671	0.710869	0.71927	2	LPXN
FAM78A	9q34.13	0.723546	4.78903e-61	1.69876e-58		TRAF3IP3	1q32.2	0.727307	9.63473e-44	3.82921e-41		FAM78A	2	0.723546	0.749398	0.736472	2	FAM78A
CXCR3	Xq13.1	0.72201	1.12601e-60	3.9253e-58		CXCL13	4q21.1	0.725168	2.24123e-43	8.75393e-41		CXCR3	2	0.72201	0.714875	0.718443	2	CXCR3
NCF1	7q11.23	0.719413	4.7194e-60	1.61731e-57		JAKMIP1	4p16.1	0.725028	2.36746e-43	9.09023e-41		NCF1	1	0.719413		0.719413	1	NCF1
ARHGAP30	1q23.3	0.719268	5.11132e-60	1.72243e-57		CRTAM	11q24.1	0.723791	3.84294e-43	1.45097e-40		ARHGAP30	2	0.719268	0.734497	0.726882	2	ARHGAP30
PYHIN1	1q23.1	0.718599	7.37101e-60	2.44319e-57		GZMH	14q12	0.723452	4.38729e-43	1.62934e-40		PYHIN1	2	0.718599	0.694688	0.706644	2	PYHIN1
GBP5	1p22.2	0.715085	4.96143e-59	1.61799e-56		ITK	5q33.3	0.72198	7.77473e-43	2.84079e-40		GBP5	1	0.715085		0.715085	1	GBP5
NLRC3	16p13.3	0.714655	6.25158e-59	2.00636e-56		TRBV5-1	7q34	0.720486	1.38449e-42	4.97845e-40		NLRC3	2	0.714655	0.712926	0.71379	2	NLRC3
TRAT1	3q13.13	0.712957	1.55147e-58	4.90145e-56		TRBV19	7q34	0.71819	3.33559e-42	1.18069e-39		TRAT1	2	0.712957	0.699857	0.706407	2	TRAT1
CXCL13	4q21.1	0.712084	2.47063e-58	7.68519e-56		CD27	12p13.31	0.717048	5.14839e-42	1.79433e-39		CXCL13	2	0.712084	0.725168	0.718626	2	CXCL13
FOXP3	Xp11.23	0.711816	2.84826e-58	8.72561e-56		ZNF831	20q13.32	0.715851	8.0966e-42	2.7791e-39		FOXP3	2	0.711816	0.693442	0.702629	2	FOXP3
FMNL1	17q21.31	0.711787	2.89267e-58	8.72938e-56		NCF1C	7q11.23	0.715335	9.83277e-42	3.32465e-39		FMNL1	2	0.711787	0.694532	0.70316	2	FMNL1
GPR174	Xq21.1	0.710509	5.69174e-58	1.69237e-55		S1PR4	19p13.3	0.715028	1.10384e-41	3.67742e-39		GPR174	2	0.710509	0.711284	0.710896	2	GPR174
GZMH	14q12	0.70787	2.2739e-57	6.66318e-55		CXCR3	Xq13.1	0.714875	1.16892e-41	3.83778e-39		GZMH	2	0.70787	0.723452	0.715661	2	GZMH
GRAP2	22q13.1	0.707322	3.02745e-57	8.74456e-55		TRBV9	7q34	0.71374	1.7891e-41	5.79004e-39		GRAP2	2	0.707322	0.729727	0.718525	2	GRAP2
KLRK1	12p13.2	0.707214	3.20133e-57	9.11657e-55		TIFAB	5q31.1	0.713161	2.22051e-41	7.08498e-39		KLRK1	1	0.707214		0.707214	1	KLRK1
CD7	17q25.3	0.701374	6.45315e-56	1.81217e-53		NLRC3	16p13.3	0.712926	2.42385e-41	7.62636e-39		CD7	2	0.701374	0.745694	0.723534	2	CD7
ZNF831	20q13.32	0.700839	8.46845e-56	2.34553e-53		JAK3	19p13.11	0.71198	3.44563e-41	1.06928e-38		ZNF831	2	0.700839	0.715851	0.708345	2	ZNF831
SLAMF1	1q23.3	0.700426	1.04393e-55	2.85233e-53		GPR174	Xq21.1	0.711284	4.45857e-41	1.36493e-38		SLAMF1	2	0.700426	0.691242	0.695834	2	SLAMF1
ARHGAP25	2p13.3	0.697188	5.31501e-55	1.43286e-52		NCF1B	7q11.23	0.710968	5.01131e-41	1.51368e-38		ARHGAP25	2	0.697188	0.693161	0.695174	2	ARHGAP25
S1PR4	19p13.3	0.69629	8.31448e-55	2.21198e-52		LPXN	11q12.1	0.710869	5.19842e-41	1.54954e-38		S1PR4	2	0.69629	0.715028	0.705659	2	S1PR4
BIN2	12q13.13	0.695722	1.10262e-54	2.8953e-52		KLHDC7B	22q13.33	0.710263	6.49988e-41	1.91231e-38		BIN2	2	0.695722	0.692588	0.694155	2	BIN2
PVRIG	7q22.1	0.695421	1.27995e-54	3.31787e-52		TRAV14DV4	14q11.2	0.708469	1.25518e-40	3.64548e-38		PVRIG	2	0.695421	0.703238	0.69933	2	PVRIG
EBI3	19p13.3	0.695378	1.30767e-54	3.34682e-52		IGFLR1	19q13.12	0.707687	1.66979e-40	4.78829e-38		EBI3	2	0.695378	0.705865	0.700621	2	EBI3
GZMK	5q11.2	0.694745	1.78879e-54	4.52094e-52		EBI3	19p13.3	0.705865	3.23518e-40	9.16122e-38		GZMK	1	0.694745		0.694745	1	GZMK
GIMAP5	7q36.1	0.694586	1.93476e-54	4.82949e-52		FCRL6	1q23.2	0.704015	6.29799e-40	1.76141e-37		GIMAP5	1	0.694586		0.694586	1	GIMAP5
SP140	2q37.1	0.693224	3.78404e-54	9.23985e-52		PVRIG	7q22.1	0.703238	8.31817e-40	2.29805e-37		SP140	1	0.693224		0.693224	1	SP140
IGFLR1	19q13.12	0.693219	3.793e-54	9.23985e-52		RHOH	4p14	0.702626	1.03505e-39	2.82507e-37		IGFLR1	2	0.693219	0.707687	0.700453	2	IGFLR1
KLHDC7B	22q13.33	0.69214	6.43905e-54	1.5499e-51		TRAT1	3q13.13	0.699857	2.76365e-39	7.4533e-37		KLHDC7B	2	0.69214	0.710263	0.701201	2	KLHDC7B
RHOH	4p14	0.691591	8.41898e-54	2.00263e-51		ABI3	17q21.32	0.698526	4.41275e-39	1.17608e-36		RHOH	2	0.691591	0.702626	0.697109	2	RHOH
JAK3	19p13.11	0.690974	1.13731e-53	2.67386e-51		LINC01281	Xp11.4	0.696719	8.29396e-39	2.18478e-36		JAK3	2	0.690974	0.71198	0.701477	2	JAK3
P2RY10	Xq21.1	0.689649	2.16329e-53	5.02753e-51		PYHIN1	1q23.1	0.694688	1.67673e-38	4.36606e-36		P2RY10	2	0.689649	0.683023	0.686336	2	P2RY10
IKZF1	7p12.2	0.68738	6.4544e-53	1.48297e-50		FMNL1	17q21.31	0.694532	1.76943e-38	4.55507e-36		IKZF1	1	0.68738		0.68738	1	IKZF1
THEMIS	6q22.33	0.685696	1.44388e-52	3.2802e-50		FOXP3	Xp11.23	0.693442	2.57547e-38	6.55559e-36		THEMIS	1	0.685696		0.685696	1	THEMIS
ICOS	2q33.2	0.685292	1.75035e-52	3.93226e-50		ARHGAP25	2p13.3	0.693161	2.83611e-38	7.1388e-36		ICOS	1	0.685292		0.685292	1	ICOS
CD48	1q23.3	0.685229	1.80302e-52	4.00607e-50		BIN2	12q13.13	0.692588	3.45038e-38	8.58955e-36		CD48	1	0.685229		0.685229	1	CD48
TTC24	1q22	0.682857	5.54277e-52	1.21814e-49		SLAMF1	1q23.3	0.691242	5.46261e-38	1.34511e-35		TTC24	2	0.682857	0.745249	0.714053	2	TTC24
GNGT2	17q21.32	0.682663	6.0724e-52	1.32019e-49		TRBV5-4	7q34	0.688516	1.37433e-37	3.34775e-35		GNGT2	2	0.682663	0.680368	0.681515	2	GNGT2
LCK	1p35.2	0.681282	1.16104e-51	2.49736e-49		P2RY10	Xq21.1	0.683023	8.55291e-37	2.06125e-34		LCK	1	0.681282		0.681282	1	LCK
TMC8	17q25.3	0.68066	1.55245e-51	3.3041e-49		TRBV3-1	7q34	0.682115	1.15263e-36	2.74859e-34		TMC8	1	0.68066		0.68066	1	TMC8
HCST	19q13.12	0.679885	2.22831e-51	4.69314e-49		CD8B	2p11.2	0.681139	1.58686e-36	3.74466e-34		HCST	1	0.679885		0.679885	1	HCST
IL10RA	11q23.3	0.67795	5.46618e-51	1.13939e-48		CD5	11q12.2	0.680937	1.69505e-36	3.94225e-34		IL10RA	1	0.67795		0.67795	1	IL10RA
GPR171	3q25.1	0.677593	6.4441e-51	1.32952e-48		RTP5	2q37.3	0.680918	1.7054e-36	3.94225e-34		GPR171	1	0.677593		0.677593	1	GPR171
ABI3	17q21.32	0.6772	7.72242e-51	1.57717e-48		GNGT2	17q21.32	0.680368	2.04042e-36	4.66906e-34		ABI3	2	0.6772	0.698526	0.687863	2	ABI3
APOBEC3H	22q13.1	0.676516	1.05814e-50	2.13945e-48		LINC00426	13q12.3	0.67933	2.85972e-36	6.4784e-34		APOBEC3H	1	0.676516		0.676516	1	APOBEC3H
												IL21R-AS1	1		0.850852	0.850852	1	IL21R-AS1
												APOBEC3F	1		0.731623	0.731623	1	APOBEC3F
												TRBV5-1	1		0.720486	0.720486	1	TRBV5-1
												TRBV19	1		0.71819	0.71819	1	TRBV19
												NCF1C	1		0.715335	0.715335	1	NCF1C
												TRBV9	1		0.71374	0.71374	1	TRBV9
												TIFAB	1		0.713161	0.713161	1	TIFAB
												NCF1B	1		0.710968	0.710968	1	NCF1B
												TRAV14DV4	1		0.708469	0.708469	1	TRAV14DV4
												FCRL6	1		0.704015	0.704015	1	FCRL6
												LINC01281	1		0.696719	0.696719	1	LINC01281
												TRBV5-4	1		0.688516	0.688516	1	TRBV5-4
												TRBV3-1	1		0.682115	0.682115	1	TRBV3-1
												CD8B	1		0.681139	0.681139	1	CD8B
												CD5	1		0.680937	0.680937	1	CD5
												RTP5	1		0.680918	0.680918	1	RTP5
												LINC00426	1		0.67933	0.67933	1	LINC00426

## Sheet: Head and Neck
Head and Neck Squamous Cell Carcinoma (TCGA, Firehose Legacy)	496 Patients/Samples					Head and Neck Squamous Cell Carcinoma (TCGA, Nature 2015)	279 Patients/Samples
Correlated Gene	Cytoband	Spearman's Correlation	p-Value	q-Value		Correlated Gene	Cytoband	Spearman's Correlation	p-Value	q-Value		Gene	Number of Times Gene Appears	Study 1 Value	Study 2 Value	Average	Number of studies	Gene
CD8A	2p11.2	0.934843	2.71737e-224	5.48801e-220		CD8A	2p11.2	0.940366	9.64668e-132	1.94033e-127		CD8A	2	0.934843	0.940366	0.937605	2	CD8A
SIRPG	20p13	0.934059	4.72602e-223	4.77234e-219		SIRPG	20p13	0.929228	8.77989e-122	8.82994e-118		SIRPG	2	0.934059	0.929228	0.931643	2	SIRPG
CD2	1p13.1	0.928662	6.52703e-215	4.394e-211		CD3D	11q23.3	0.92824	5.58482e-121	3.74443e-117		CD2	2	0.928662	0.916711	0.922687	2	CD2
CD3E	11q23.3	0.928183	3.21555e-214	1.62353e-210		CD3E	11q23.3	0.926715	9.21722e-120	4.63488e-116		CD3E	2	0.928183	0.926715	0.927449	2	CD3E
NKG7	19q13.41	0.919869	6.27047e-203	2.53277e-199		NKG7	19q13.41	0.924858	2.58922e-118	1.04159e-114		NKG7	2	0.919869	0.924858	0.922364	2	NKG7
CXCR6	3p21.31	0.916348	1.64362e-198	5.53241e-195		SLA2	20q11.23	0.92224	2.46652e-116	8.26858e-113		CXCR6	2	0.916348	0.903546	0.909947	2	CXCR6
CD3D	11q23.3	0.914496	2.89124e-196	8.34165e-193		CD2	1p13.1	0.916711	2.25607e-112	6.48266e-109		CD3D	2	0.914496	0.92824	0.921368	2	CD3D
SLA2	20q11.23	0.912196	1.51801e-193	3.8322e-190		JAKMIP1	4p16.1	0.915229	2.33476e-111	5.87016e-108		SLA2	2	0.912196	0.92224	0.917218	2	SLA2
TIGIT	3q13.31	0.911755	4.94515e-193	1.10969e-189		TIGIT	3q13.31	0.911408	7.97724e-109	1.78283e-105		TIGIT	2	0.911755	0.911408	0.911581	2	TIGIT
JAKMIP1	4p16.1	0.911478	1.03585e-192	2.092e-189		CD3G	11q23.3	0.910327	3.96015e-108	7.96544e-105		JAKMIP1	2	0.911478	0.915229	0.913353	2	JAKMIP1
UBASH3A	21q22.3	0.903808	3.16788e-184	5.81623e-181		CXCR6	3p21.31	0.903546	5.9118e-104	1.081e-100		UBASH3A	2	0.903808	0.897689	0.900749	2	UBASH3A
CXCR3	Xq13.1	0.900967	2.91573e-181	4.90717e-178		CXCR3	Xq13.1	0.9025	2.44488e-103	4.09803e-100		CXCR3	2	0.900967	0.9025	0.901733	2	CXCR3
TBX21	17q21.32	0.895792	4.352e-176	6.761e-173		PTPRCAP	11q13.2	0.89964	1.09103e-101	1.68807e-98		TBX21	2	0.895792	0.886887	0.891339	2	TBX21
KLRK1	12p13.2	0.893548	6.2729e-174	9.0491e-171		KLRK1	12p13.2	0.898977	2.59156e-101	3.72333e-98		KLRK1	2	0.893548	0.898977	0.896262	2	KLRK1
PTPRCAP	11q13.2	0.890193	8.66272e-171	1.16635e-167		UBASH3A	21q22.3	0.897689	1.36515e-100	1.83057e-97		PTPRCAP	2	0.890193	0.89964	0.894917	2	PTPRCAP
GZMH	14q12	0.89002	1.25035e-170	1.57825e-167		FASLG	1q24.3	0.897637	1.45991e-100	1.83529e-97		GZMH	2	0.89002	0.896647	0.893333	2	GZMH
LAG3	12p13.31	0.88672	1.20809e-167	1.43521e-164		GZMH	14q12	0.896647	5.15418e-100	6.09831e-97		LAG3	2	0.88672	0.894103	0.890412	2	LAG3
TBC1D10C	11q13.2	0.886404	2.30774e-167	2.46116e-164		ITGAL	16p11.2	0.895664	1.7828e-99	1.99218e-96		TBC1D10C	2	0.886404	0.893926	0.890165	2	TBC1D10C
CD96	3q13.13-q13.2	0.886403	2.31541e-167	2.46116e-164		LAG3	12p13.31	0.894103	1.245e-98	1.31799e-95		CD96	2	0.886403	0.888783	0.887593	2	CD96
CCR5	3p21.31	0.886336	2.654e-167	2.68001e-164		TBC1D10C	11q13.2	0.893926	1.55006e-98	1.5589e-95		CCR5	2	0.886336	0.879601	0.882969	2	CCR5
SH2D1A	Xq25	0.883272	1.27147e-164	1.2228e-161		SH2D1A	Xq25	0.893248	3.56579e-98	3.41535e-95		SH2D1A	2	0.883272	0.893248	0.88826	2	SH2D1A
FASLG	1q24.3	0.881153	8.2076e-163	7.53458e-160		CD96	3q13.13-q13.2	0.888783	7.53249e-96	6.88675e-93		FASLG	2	0.881153	0.897637	0.889395	2	FASLG
CD8B	2p11.2	0.880893	1.36313e-162	1.19694e-159		TBX21	17q21.32	0.886887	6.82665e-95	5.97005e-92		CD8B	2	0.880893	0.869391	0.875142	2	CD8B
CD7	17q25.3	0.880862	1.44562e-162	1.21649e-159		CD7	17q25.3	0.885789	2.40411e-94	2.01484e-91		CD7	2	0.880862	0.885789	0.883326	2	CD7
ITGAL	16p11.2	0.878262	2.13243e-160	1.72266e-157		ARHGAP9	12q13.3	0.885481	3.41317e-94	2.7461e-91		ITGAL	2	0.878262	0.895664	0.886963	2	ITGAL
CD3G	11q23.3	0.875892	1.83116e-158	1.42239e-155		CCR5	3p21.31	0.879601	2.28955e-91	1.77123e-88		CD3G	2	0.875892	0.910327	0.89311	2	CD3G
SASH3	Xq26.1	0.8714	6.64389e-155	4.96963e-152		PRF1	10q22.1	0.879266	3.2848e-91	2.44706e-88		SASH3	2	0.8714	0.860006	0.865703	2	SASH3
SEPTIN1	16p11.2	0.871243	8.79213e-155	6.34163e-152		GZMM	19p13.3	0.878488	7.55583e-91	5.42778e-88		SEPTIN1	2	0.871243	0.878059	0.874651	2	SEPTIN1
CD48	1q23.3	0.869843	1.05712e-153	7.36191e-151		SEPTIN1	16p11.2	0.878059	1.19315e-90	8.27552e-88		CD48	2	0.869843	0.853149	0.861496	2	CD48
ARHGAP9	12q13.3	0.869785	1.17151e-153	7.8866e-151		MAP4K1	19q13.2	0.875177	2.46095e-89	1.64999e-86		ARHGAP9	2	0.869785	0.885481	0.877633	2	ARHGAP9
SLAMF6	1q23.2-q23.3	0.866486	3.67478e-151	2.39406e-148		GPR171	3q25.1	0.873493	1.3919e-88	9.0312e-86		SLAMF6	2	0.866486	0.87317	0.869828	2	SLAMF6
GZMM	19p13.3	0.866233	5.67016e-151	3.57858e-148		PYHIN1	1q23.1	0.87344	1.47028e-88	9.24165e-86		GZMM	2	0.866233	0.878488	0.872361	2	GZMM
CD247	1q24.2	0.861697	1.1804e-147	7.22407e-145		SLAMF6	1q23.2-q23.3	0.87317	1.9356e-88	1.17978e-85		CD247	2	0.861697	0.846452	0.854074	2	CD247
SCML4	6q21	0.859174	7.36675e-146	4.37585e-143		SIT1	9p13.3	0.872751	2.96401e-88	1.75347e-85		SCML4	2	0.859174	0.864273	0.861723	2	SCML4
SIT1	9p13.3	0.858479	2.26889e-145	1.30921e-142		CD8B	2p11.2	0.869391	8.57972e-87	4.93064e-84		SIT1	2	0.858479	0.872751	0.865615	2	SIT1
GZMB	14q12	0.856847	3.10289e-144	1.74072e-141		ITK	5q33.3	0.865452	3.94279e-85	2.20293e-82		GZMB	2	0.856847	0.861279	0.859063	2	GZMB
CD6	11q12.2	0.855176	4.38084e-143	2.39123e-140		SCML4	6q21	0.864273	1.21106e-84	6.58358e-82		CD6	2	0.855176	0.838385	0.84678	2	CD6
CD74	5q33.1	0.853695	4.44209e-142	2.36086e-139		GZMB	14q12	0.861279	1.99675e-83	1.05691e-80		CD74	2	0.853695	0.845725	0.84971	2	CD74
PYHIN1	1q23.1	0.853539	5.66551e-142	2.93386e-139		SASH3	Xq26.1	0.860006	6.44377e-83	3.32333e-80		PYHIN1	2	0.853539	0.87344	0.863489	2	PYHIN1
PRF1	10q22.1	0.850249	8.85795e-140	4.47238e-137		TRAT1	3q13.13	0.858505	2.52838e-82	1.27139e-79		PRF1	2	0.850249	0.879266	0.864757	2	PRF1
RASAL3	19p13.12	0.84992	1.45871e-139	7.18537e-137		RASAL3	19p13.12	0.856589	1.41552e-81	6.94433e-79		RASAL3	2	0.84992	0.856589	0.853254	2	RASAL3
CIITA	16p13.13	0.849515	2.68801e-139	1.29255e-136		IL12RB1	19p13.11	0.856235	1.93988e-81	9.29016e-79		CIITA	2	0.849515	0.852245	0.85088	2	CIITA
TRAT1	3q13.13	0.848337	1.57831e-138	7.41292e-136		GRAP2	22q13.1	0.8555	3.72587e-81	1.74284e-78		TRAT1	2	0.848337	0.858505	0.853421	2	TRAT1
WAS	Xp11.23	0.848236	1.83511e-138	8.42316e-136		WAS	Xp11.23	0.8536	1.97682e-80	9.03678e-78		WAS	2	0.848236	0.8536	0.850918	2	WAS
IL12RB1	19p13.11	0.84752	5.34111e-138	2.39709e-135		CD48	1q23.3	0.853149	2.92912e-80	1.30925e-77		IL12RB1	2	0.84752	0.856235	0.851877	2	IL12RB1
IFNG	12q15	0.8473	7.40877e-138	3.25277e-135		GPR174	Xq21.1	0.852442	5.40939e-80	2.36531e-77		IFNG	2	0.8473	0.846576	0.846938	2	IFNG
ABI3	17q21.32	0.847247	8.01079e-138	3.44225e-135		C5ORF56	5q31.1	0.852332	5.94587e-80	2.54458e-77		ABI3	2	0.847247	0.842255	0.844751	2	ABI3
SLAMF1	1q23.3	0.847181	8.8373e-138	3.7183e-135		CIITA	16p13.13	0.852245	6.41174e-80	2.68678e-77		SLAMF1	2	0.847181	0.84861	0.847896	2	SLAMF1
GPR171	3q25.1	0.84694	1.26211e-137	5.20197e-135		SLAMF1	1q23.3	0.84861	1.4204e-78	5.83061e-76		GPR171	2	0.84694	0.873493	0.860217	2	GPR171
MAP4K1	19q13.2	0.845096	1.90367e-136	7.68932e-134		SAMD3	6q23.1	0.847548	3.46053e-78	1.3921e-75		MAP4K1	2	0.845096	0.875177	0.860136	2	MAP4K1
CXCR2P1	2q35	0.843139	3.26321e-135	1.29223e-132		IL2RB	22q12.3	0.846875	6.0596e-78	2.38986e-75		CXCR2P1	2	0.843139	0.820611	0.831875	2	CXCR2P1
CD27	12p13.31	0.842713	6.02949e-135	2.34176e-132		IFNG	12q15	0.846576	7.76445e-78	3.00335e-75		CD27	2	0.842713	0.841435	0.842074	2	CD27
IL2RG	Xq13.1	0.839372	6.94242e-133	2.64546e-130		CD247	1q24.2	0.846452	8.60803e-78	3.26683e-75		IL2RG	2	0.839372	0.815884	0.827628	2	IL2RG
ITK	5q33.3	0.83813	3.94838e-132	1.4767e-129		CD74	5q33.1	0.845725	1.56807e-77	5.84076e-75		ITK	2	0.83813	0.865452	0.851791	2	ITK
GIMAP5	7q36.1	0.838096	4.13658e-132	1.51895e-129		BATF	14q24.3	0.844537	4.15576e-77	1.5198e-74		GIMAP5	2	0.838096	0.83434	0.836218	2	GIMAP5
SLA	8q24.22	0.836258	5.2654e-131	1.89893e-128		GVINP1	11p15.4	0.843026	1.41907e-76	5.097e-74		SLA	2	0.836258	0.835838	0.836048	2	SLA
IL21R	16p12.1	0.835823	9.5712e-131	3.39123e-128		ABI3	17q21.32	0.842255	2.64283e-76	9.32593e-74		IL21R	2	0.835823	0.832294	0.834058	2	IL21R
CTLA4	2q33.2	0.833419	2.51717e-129	8.76497e-127		CD27	12p13.31	0.841435	5.09773e-76	1.76786e-73		CTLA4	2	0.833419	0.831578	0.832498	2	CTLA4
TARP	7p14.1	0.829603	4.06372e-127	1.39103e-124		IKZF1	7p12.2	0.840656	9.49143e-76	3.23577e-73		TARP	2	0.829603	0.837798	0.833701	2	TARP
GZMK	5q11.2	0.828837	1.10977e-126	3.73547e-124		CD6	11q12.2	0.838385	5.69192e-75	1.90812e-72		GZMK	2	0.828837	0.817331	0.823084	2	GZMK
CST7	20p11.21	0.828619	1.47661e-126	4.8888e-124		TARP	7p14.1	0.837798	9.00425e-75	2.96904e-72		CST7	2	0.828619	0.816395	0.822507	2	CST7
ARHGAP15	2q22.2-q22.3	0.828346	2.10953e-126	6.87161e-124		CORO1A	16p11.2	0.836911	1.79528e-74	5.82425e-72		ARHGAP15	2	0.828346	0.825203	0.826774	2	ARHGAP15
GPR18	13q32.3	0.827889	3.8249e-126	1.22615e-123		PVRIG	7q22.1	0.836606	2.27347e-74	7.25849e-72		GPR18	2	0.827889	0.832554	0.830222	2	GPR18
HCST	19q13.12	0.826562	2.13635e-125	6.74153e-123		ZNF831	20q13.32	0.836154	3.22116e-74	1.01235e-71		HCST	2	0.826562	0.823189	0.824875	2	HCST
HLA-DMB	6p21.32	0.825879	5.14232e-125	1.59776e-122		NLRC3	16p13.3	0.83596	3.74105e-74	1.15765e-71		HLA-DMB	1	0.825879		0.825879	1	HLA-DMB
GRAP2	22q13.1	0.825584	7.50884e-125	2.29771e-122		SLA	8q24.22	0.835838	4.1115e-74	1.25301e-71		GRAP2	2	0.825584	0.8555	0.840542	2	GRAP2
CORO1A	16p11.2	0.824024	5.49756e-124	1.65715e-121		CD226	18q22.2	0.83548	5.40947e-74	1.62397e-71		CORO1A	2	0.824024	0.836911	0.830467	2	CORO1A
IRF8	16q24.1	0.823435	1.15889e-123	3.44189e-121		AKNA	9q32	0.835455	5.51811e-74	1.63222e-71		IRF8	2	0.823435	0.82571	0.824573	2	IRF8
LINC00426	13q12.3	0.823228	1.50581e-123	4.40743e-121		SPOCK2	10q22.1	0.835215	6.63212e-74	1.93331e-71		LINC00426	2	0.823228	0.807834	0.815531	2	LINC00426
SAMD3	6q23.1	0.821728	9.92786e-123	2.86433e-120		ZAP70	2q11.2	0.835155	6.94234e-74	1.99483e-71		SAMD3	2	0.821728	0.847548	0.834638	2	SAMD3
GZMA	5q11.2	0.819174	2.36357e-121	6.72319e-119		GIMAP5	7q36.1	0.83434	1.29433e-73	3.66679e-71		GZMA	2	0.819174	0.830099	0.824636	2	GZMA
HLA-DMA	6p21.32	0.819125	2.50917e-121	7.03821e-119		LAT	16p11.2	0.832992	3.59502e-73	1.00431e-70		HLA-DMA	1	0.819125		0.819125	1	HLA-DMA
HLA-DPB1	6p21.32	0.816259	8.28947e-120	2.29335e-117		GPR18	13q32.3	0.832554	5.0042e-73	1.37883e-70		HLA-DPB1	1	0.816259		0.816259	1	HLA-DPB1
CD5	11q12.2	0.815423	2.27272e-119	6.20268e-117		IL21R	16p12.1	0.832294	6.0836e-73	1.65359e-70		CD5	2	0.815423	0.82484	0.820131	2	CD5
GIMAP1	7q36.1	0.814504	6.84141e-119	1.84226e-116		CTLA4	2q33.2	0.831578	1.04067e-72	2.79093e-70		GIMAP1	2	0.814504	0.819874	0.817189	2	GIMAP1
KLRD1	12p13.2	0.814277	8.97808e-119	2.38581e-116		GZMA	5q11.2	0.830099	3.1293e-72	8.28193e-70		KLRD1	2	0.814277	0.824445	0.819361	2	KLRD1
ZNF831	20q13.32	0.813175	3.33637e-118	8.64768e-116		IRF8	16q24.1	0.82571	7.71262e-71	2.0147e-68		ZNF831	2	0.813175	0.836154	0.824665	2	ZNF831
IKZF1	7p12.2	0.813174	3.33987e-118	8.64768e-116		ARHGAP15	2q22.2-q22.3	0.825203	1.11072e-70	2.86424e-68		IKZF1	2	0.813174	0.840656	0.826915	2	IKZF1
HLA-DRA	6p21.32	0.811972	1.38403e-117	3.53821e-115		CD5	11q12.2	0.82484	1.44069e-70	3.66811e-68		HLA-DRA	1	0.811972		0.811972	1	HLA-DRA
IL2RB	22q12.3	0.810678	6.32367e-117	1.59641e-114		KLRD1	12p13.2	0.824445	1.91104e-70	4.80483e-68		IL2RB	2	0.810678	0.846875	0.828776	2	IL2RB
C5ORF56	5q31.1	0.810428	8.47014e-117	2.11189e-114		HCST	19q13.12	0.823189	4.66975e-70	1.1596e-67		C5ORF56	2	0.810428	0.852332	0.83138	2	C5ORF56
CRTAM	11q24.1	0.810408	8.6664e-117	2.13447e-114		PTPRC	1q31.3-q32.1	0.821228	1.85796e-69	4.55744e-67		CRTAM	1	0.810408		0.810408	1	CRTAM
TRAF3IP3	1q32.2	0.810226	1.07175e-116	2.60784e-114		CXCR2P1	2q35	0.820611	2.85904e-69	6.92852e-67		TRAF3IP3	1	0.810226		0.810226	1	TRAF3IP3
HLA-DPA1	6p21.32	0.809889	1.58757e-116	3.81696e-114		GIMAP1	7q36.1	0.819874	4.7748e-69	1.14334e-66		HLA-DPA1	1	0.809889		0.809889	1	HLA-DPA1
TNFRSF1B	1p36.22	0.809655	2.08398e-116	4.95153e-114		THEMIS	6q22.33	0.818564	1.18073e-68	2.79402e-66		TNFRSF1B	2	0.809655	0.816778	0.813217	2	TNFRSF1B
IL10RA	11q23.3	0.808959	4.67335e-116	1.09748e-113		GZMK	5q11.2	0.817331	2.75012e-68	6.43207e-66		IL10RA	1	0.808959		0.808959	1	IL10RA
AKNA	9q32	0.808426	8.65166e-116	2.00838e-113		BIN2	12q13.13	0.817132	3.14924e-68	7.28091e-66		AKNA	2	0.808426	0.835455	0.82194	2	AKNA
ZNF683	1p36.11	0.807359	2.95432e-115	6.78016e-113		TNFRSF1B	1p36.22	0.816778	4.00918e-68	9.16371e-66		ZNF683	1	0.807359		0.807359	1	ZNF683
NLRC3	16p13.3	0.807198	3.55322e-115	8.06301e-113		CST7	20p11.21	0.816395	5.20182e-68	1.17561e-65		NLRC3	2	0.807198	0.83596	0.821579	2	NLRC3
ICOS	2q33.2	0.806952	4.70772e-115	1.05641e-112		IL2RG	Xq13.1	0.815884	7.3571e-68	1.64423e-65		ICOS	1	0.806952		0.806952	1	ICOS
SPOCK2	10q22.1	0.806797	5.61739e-115	1.24669e-112		BTLA	3q13.2	0.815749	8.06068e-68	1.78168e-65		SPOCK2	2	0.806797	0.835215	0.821006	2	SPOCK2
LAT	16p11.2	0.805688	1.98823e-114	4.3646e-112		ABCD2	12q12	0.813987	2.63854e-67	5.76865e-65		LAT	2	0.805688	0.832992	0.81934	2	LAT
SELPLG	12q24.11	0.80487	5.02189e-114	1.09056e-111		SELPLG	12q24.11	0.813869	2.85625e-67	6.17749e-65		SELPLG	2	0.80487	0.813869	0.809369	2	SELPLG
GIMAP4	7q36.1	0.804788	5.51008e-114	1.18385e-111		GIMAP7	7q36.1	0.812443	7.38422e-67	1.58007e-64		GIMAP4	2	0.804788	0.808951	0.80687	2	GIMAP4
GBP4	1p22.2	0.802804	5.11405e-113	1.08719e-110		ARHGAP30	1q23.3	0.811601	1.289e-66	2.72915e-64		GBP4	1	0.802804		0.802804	1	GBP4
ACAP1	17p13.1	0.802715	5.64678e-113	1.18794e-110		SPN	16p11.2	0.810579	2.52537e-66	5.29117e-64		ACAP1	1	0.802715		0.802715	1	ACAP1
SPN	16p11.2	0.80262	6.28173e-113	1.30789e-110		GIMAP4	7q36.1	0.808951	7.30513e-66	1.5148e-63		SPN	2	0.80262	0.810579	0.806599	2	SPN
ZAP70	2q11.2	0.801497	2.19018e-112	4.51355e-110		IL18BP	11q13.4	0.808068	1.29445e-65	2.6568e-63		ZAP70	2	0.801497	0.835155	0.818326	2	ZAP70
MYO1F	19p13.2	0.799675	1.63224e-111	3.32977e-109		LINC00426	13q12.3	0.807834	1.50588e-65	3.05953e-63		MYO1F	1	0.799675		0.799675	1	MYO1F
FERMT3	11q13.1	0.799271	2.5417e-111	5.13323e-109		P2RY10	Xq21.1	0.806367	3.86677e-65	7.77763e-63		FERMT3	1	0.799271		0.799271	1	FERMT3
												GPR174	1		0.852442	0.852442	1	GPR174
												BATF	1		0.844537	0.844537	1	BATF
												GVINP1	1		0.843026	0.843026	1	GVINP1
												PVRIG	1		0.836606	0.836606	1	PVRIG
												CD226	1		0.83548	0.83548	1	CD226
												PTPRC	1		0.821228	0.821228	1	PTPRC
												THEMIS	1		0.818564	0.818564	1	THEMIS
												BIN2	1		0.817132	0.817132	1	BIN2
												BTLA	1		0.815749	0.815749	1	BTLA
												ABCD2	1		0.813987	0.813987	1	ABCD2
												GIMAP7	1		0.812443	0.812443	1	GIMAP7
												ARHGAP30	1		0.811601	0.811601	1	ARHGAP30
												IL18BP	1		0.808068	0.808068	1	IL18BP
												P2RY10	1		0.806367	0.806367	1	P2RY10

## Sheet: Lymphoma
Lymphoid Neoplasm Diffuse Large B-cell Lymphoma (TCGA, Firehose Legacy)	48 Patients/Samples
Correlated Gene	Cytoband	Spearman's Correlation	p-Value	q-Value
RTP5	2q37.3	0.711863	1.40594e-08	0.000281736
ITM2A	Xq21.1	0.678571	1.15643e-07	0.00115869
SYTL2	11q14.1	0.621472	2.42977e-06	0.0135416
GNG4	1q42.3	0.61637	3.09787e-06	0.0135416
LOC100128288	17p13.1	0.614525	3.37882e-06	0.0135416
ACSL6	5q31.1	0.606057	4.99712e-06	0.0150291
RIN3	14q32.12	0.604972	5.24996e-06	0.0150291

## Sheet: Breast
Breast Invasive Carcinoma (TCGA, Firehose Legacy)	960 Patients/Samples					Breast Invasive Carcinoma (TCGA, Cell 2015)	816 Patients/Samples
Correlated Gene	Cytoband	Spearman's Correlation	p-Value	q-Value		Correlated Gene	Cytoband	Spearman's Correlation	p-Value	q-Value		Gene	Number of Times Gene Appears	Study 1 Value	Study 2 Value	Average	Number of studies	Gene
ACAP1	17p13.1	0.899323	0	0		ACAP1	17p13.1	0.90251	4.82559e-300	9.71921e-296		ACAP1	2	0.899323	0.90251	0.900916	2	ACAP1
CD3D	11q23.3	0.897822	0	0		CD3D	11q23.3	0.897632	7.27094e-292	7.3222e-288		CD3D	2	0.897822	0.897632	0.897727	2	CD3D
TBC1D10C	11q13.2	0.890925	0	0		CXCR3	Xq13.1	0.893879	7.56983e-286	5.08213e-282		TBC1D10C	2	0.890925	0.893517	0.892221	2	TBC1D10C
CD247	1q24.2	0.889691	0	0		TBC1D10C	11q13.2	0.893517	2.80281e-285	1.41129e-281		CD247	2	0.889691	0.893125	0.891408	2	CD247
CXCR3	Xq13.1	0.887833	0	0		CD247	1q24.2	0.893125	1.14616e-284	4.61698e-281		CXCR3	2	0.887833	0.893879	0.890856	2	CXCR3
TBX21	17q21.32	0.887663	0	0		ZAP70	2q11.2	0.891358	6.22873e-282	2.09088e-278		TBX21	2	0.887663	0.889816	0.888739	2	TBX21
ZAP70	2q11.2	0.887445	0	0		TBX21	17q21.32	0.889816	1.38883e-279	3.99605e-276		ZAP70	2	0.887445	0.891358	0.889402	2	ZAP70
CD3E	11q23.3	0.883902	1.859614e-318	4.688551004e-315		LCK	1p35.2	0.888134	4.60451e-277	1.15924e-273		CD3E	2	0.883902	0.885593	0.884747	2	CD3E
SIRPG	20p13	0.883517	8.23708e-318	1.8460216465e-314		CD7	17q25.3	0.885648	2.07402e-273	4.64143e-270		SIRPG	2	0.883517	0.882739	0.883128	2	SIRPG
SIT1	9p13.3	0.882453	4.8993496e-316	9.88198815535e-313		CD3E	11q23.3	0.885593	2.49417e-273	5.02351e-270		SIT1	2	0.882453	0.88395	0.883201	2	SIT1
LCK	1p35.2	0.882373	6.644144e-316	1.218294407175e-312		PRF1	10q22.1	0.884282	1.93927e-271	3.55081e-268		LCK	2	0.882373	0.888134	0.885254	2	LCK
CD2	1p13.1	0.881102	8.2816346676e-314	1.39200476038724e-310		SIT1	9p13.3	0.88395	5.80486e-271	9.74298e-268		CD2	2	0.881102	0.882597	0.88185	2	CD2
PRF1	10q22.1	0.88012	3.319780729594e-312	0		PTPRCAP	11q13.2	0.883532	2.28879e-270	3.54604e-267		PRF1	2	0.88012	0.884282	0.882201	2	PRF1
PTPRCAP	11q13.2	0.879568	2.608527662318e-311	3.75814e-308		SIRPG	20p13	0.882739	3.06045e-269	4.40289e-266		PTPRCAP	2	0.879568	0.883532	0.88155	2	PTPRCAP
CD7	17q25.3	0.878237	0	4.84244e-306		CD2	1p13.1	0.882597	4.85462e-269	6.51846e-266		CD7	2	0.878237	0.885648	0.881942	2	CD7
NKG7	19q13.41	0.878077	0	8.17667e-306		NKG7	19q13.41	0.881003	8.33545e-267	1.04928e-263		NKG7	2	0.878077	0.881003	0.87954	2	NKG7
SLA2	20q11.23	0.875374	1.18612e-304	1.4073e-301		SLA2	20q11.23	0.878363	3.56535e-263	4.2241e-260		SLA2	2	0.875374	0.878363	0.876869	2	SLA2
CCL5	17q12	0.873769	3.61814e-302	4.05432e-299		PTPN7	1q32.1	0.874982	1.20638e-258	1.34987e-255		CCL5	2	0.873769	0.871929	0.872849	2	CCL5
PTPN7	1q32.1	0.87008	1.39064e-296	1.47627e-293		CCL5	17q12	0.871929	1.14924e-254	1.21825e-251		PTPN7	2	0.87008	0.874982	0.872531	2	PTPN7
CD27	12p13.31	0.868777	1.18897e-294	1.19908e-291		UBASH3A	21q22.3	0.871002	1.77131e-253	1.7838e-250		CD27	2	0.868777	0.869303	0.86904	2	CD27
IL2RG	Xq13.1	0.868242	7.27819e-294	6.99053e-291		CD27	12p13.31	0.869303	2.51703e-251	2.41407e-248		IL2RG	2	0.868242	0.86844	0.868341	2	IL2RG
UBASH3A	21q22.3	0.86359	3.66751e-287	3.36244e-284		IL2RG	Xq13.1	0.86844	3.03993e-250	2.78305e-247		UBASH3A	2	0.86359	0.871002	0.867296	2	UBASH3A
S1PR4	19p13.3	0.862549	1.06925e-285	9.37682e-283		GZMA	5q11.2	0.866603	5.77144e-248	5.05403e-245		S1PR4	2	0.862549	0.861697	0.862123	2	S1PR4
GZMA	5q11.2	0.861994	6.39801e-285	5.37699e-282		CD5	11q12.2	0.862785	2.44805e-243	2.05442e-240		GZMA	2	0.861994	0.866603	0.864298	2	GZMA
CD5	11q12.2	0.861103	1.11156e-283	8.96805e-281		CXCR6	3p21.31	0.861712	4.62173e-242	3.72345e-239		CD5	2	0.861103	0.862785	0.861944	2	CD5
CXCR6	3p21.31	0.859363	2.76966e-281	2.14862e-278		S1PR4	19p13.3	0.861697	4.81709e-242	3.73158e-239		CXCR6	2	0.859363	0.861712	0.860537	2	CXCR6
SLAMF6	1q23.2-q23.3	0.853738	9.39026e-274	7.01487e-271		CD6	11q12.2	0.858073	8.1697e-238	6.09429e-235		SLAMF6	2	0.853738	0.857824	0.855781	2	SLAMF6
SH2D1A	Xq25	0.85163	5.18233e-271	3.73313e-268		SLAMF6	1q23.2-q23.3	0.857824	1.57891e-237	1.13575e-234		SH2D1A	2	0.85163	0.856952	0.854291	2	SH2D1A
TIGIT	3q13.31	0.850791	6.216e-270	4.32333e-267		MAP4K1	19q13.2	0.857388	4.98768e-237	3.46403e-234		TIGIT	2	0.850791	0.851425	0.851108	2	TIGIT
CD6	11q12.2	0.848935	1.43469e-267	9.64588e-265		SH2D1A	Xq25	0.856952	1.57083e-236	1.0546e-233		CD6	2	0.848935	0.858073	0.853504	2	CD6
MAP4K1	19q13.2	0.848561	4.25695e-267	2.76976e-264		SLAMF1	1q23.3	0.855549	6.14893e-235	3.99502e-232		MAP4K1	2	0.848561	0.857388	0.852975	2	MAP4K1
SLAMF1	1q23.3	0.847868	3.17188e-266	1.99928e-263		GZMM	19p13.3	0.851962	6.07923e-231	3.82631e-228		SLAMF1	2	0.847868	0.855549	0.851709	2	SLAMF1
GZMM	19p13.3	0.846899	5.17624e-265	3.16378e-262		TIGIT	3q13.31	0.851425	2.358e-230	1.43917e-227		GZMM	2	0.846899	0.851962	0.849431	2	GZMM
CD8A	2p11.2	0.845474	3.03124e-263	1.79824e-260		CD8A	2p11.2	0.849806	1.36372e-228	8.07843e-226		CD8A	2	0.845474	0.849806	0.84764	2	CD8A
PSTPIP1	15q24.3	0.841324	3.3741e-258	1.94444e-255		PSTPIP1	15q24.3	0.848415	4.28784e-227	2.46747e-224		PSTPIP1	2	0.841324	0.848415	0.84487	2	PSTPIP1
ITK	5q33.3	0.839206	1.11641e-255	6.25498e-253		LY9	1q23.3	0.846819	2.14769e-225	1.20158e-222		ITK	2	0.839206	0.845363	0.842285	2	ITK
LY9	1q23.3	0.838359	1.11277e-254	6.06612e-252		ITK	5q33.3	0.845363	7.33053e-224	3.99038e-221		LY9	2	0.838359	0.846819	0.842589	2	LY9
PYHIN1	1q23.1	0.835742	1.23669e-251	6.5642e-249		LAT	16p11.2	0.84474	3.28177e-223	1.73942e-220		PYHIN1	2	0.835742	0.835768	0.835755	2	PYHIN1
SPOCK2	10q22.1	0.833581	3.68951e-249	1.90814e-246		SPOCK2	10q22.1	0.838324	1.15276e-216	5.95327e-214		SPOCK2	2	0.833581	0.838324	0.835952	2	SPOCK2
CD96	3q13.13-q13.2	0.83332	7.30244e-249	3.68226e-246		CD96	3q13.13-q13.2	0.838036	2.23192e-216	1.12383e-213		CD96	2	0.83332	0.838036	0.835678	2	CD96
IL12RB1	19p13.11	0.833297	7.76298e-249	3.81901e-246		IL12RB1	19p13.11	0.836334	1.07907e-214	5.29234e-212		IL12RB1	2	0.833297	0.836334	0.834815	2	IL12RB1
LAT	16p11.2	0.832677	3.90471e-248	1.87519e-245		GPR171	3q25.1	0.836324	1.10361e-214	5.29234e-212		LAT	2	0.832677	0.84474	0.838709	2	LAT
GPR171	3q25.1	0.829193	3.05495e-244	1.43298e-241		PYHIN1	1q23.1	0.835768	3.88621e-214	1.82028e-211		GPR171	2	0.829193	0.836324	0.832759	2	GPR171
TMC8	17q25.3	0.828578	1.4554e-243	6.67169e-241		TMC8	17q25.3	0.835563	6.17478e-214	2.82651e-211		TMC8	2	0.828578	0.835563	0.83207	2	TMC8
JAK3	19p13.11	0.826444	3.121e-241	1.3989e-238		CORO1A	16p11.2	0.831679	3.50425e-210	1.56842e-207		JAK3	2	0.826444	0.827413	0.826929	2	JAK3
SCML4	6q21	0.826318	4.2795e-241	1.87647e-238		SCML4	6q21	0.830148	9.95633e-209	4.35936e-206		SCML4	2	0.826318	0.830148	0.828233	2	SCML4
GZMK	5q11.2	0.825281	5.65391e-240	2.42637e-237		GZMK	5q11.2	0.829233	7.22856e-208	3.09767e-205		GZMK	2	0.825281	0.829233	0.827257	2	GZMK
SEPTIN1	16p11.2	0.824126	9.81333e-239	4.12364e-236		CD48	1q23.3	0.828395	4.41048e-207	1.85066e-204		SEPTIN1	2	0.824126	0.827343	0.825734	2	SEPTIN1
ARHGAP9	12q13.3	0.823359	6.4637e-238	2.66067e-235		JAK3	19p13.11	0.827413	3.61336e-206	1.48524e-203		ARHGAP9	2	0.823359	0.826471	0.824915	2	ARHGAP9
CORO1A	16p11.2	0.823068	1.31698e-237	5.31269e-235		SEPTIN1	16p11.2	0.827343	4.20061e-206	1.69209e-203		CORO1A	2	0.823068	0.831679	0.827373	2	CORO1A
SAMD3	6q23.1	0.822911	1.93333e-237	7.64612e-235		KLRK1	12p13.2	0.826871	1.14909e-205	4.53801e-203		SAMD3	2	0.822911	0.824561	0.823736	2	SAMD3
KLRK1	12p13.2	0.821896	2.28737e-236	8.87237e-234		ZNF831	20q13.32	0.826511	2.47388e-205	9.582e-203		KLRK1	2	0.821896	0.826871	0.824384	2	KLRK1
CD48	1q23.3	0.821326	9.11778e-236	3.46992e-233		ARHGAP9	12q13.3	0.826471	2.69341e-205	1.02355e-202		CD48	2	0.821326	0.828395	0.82486	2	CD48
TRAT1	3q13.13	0.82042	8.10033e-235	3.02562e-232		TRAT1	3q13.13	0.825756	1.22517e-204	4.56964e-202		TRAT1	2	0.82042	0.825756	0.823088	2	TRAT1
ZNF831	20q13.32	0.819027	2.27944e-233	8.35932e-231		SAMD3	6q23.1	0.824561	1.51763e-203	5.55756e-201		ZNF831	2	0.819027	0.826511	0.822769	2	ZNF831
CTSW	11q13.1	0.818298	1.29106e-232	4.65012e-230		BTLA	3q13.2	0.82344	1.58118e-202	5.68687e-200		CTSW	2	0.818298	0.819207	0.818752	2	CTSW
RASAL3	19p13.12	0.815846	4.16896e-230	1.47523e-227		CD8B	2p11.2	0.819608	4.20837e-199	1.48703e-196		RASAL3	2	0.815846	0.818458	0.817152	2	RASAL3
CTLA4	2q33.2	0.812735	5.62538e-227	1.95627e-224		CTSW	11q13.1	0.819207	9.50833e-199	3.30185e-196		CTLA4	2	0.812735	0.809772	0.811253	2	CTLA4
WAS	Xp11.23	0.811002	2.93859e-225	1.0046e-222		RASAL3	19p13.12	0.818458	4.32459e-198	1.4763e-195		WAS	2	0.811002	0.814839	0.812921	2	WAS
BTLA	3q13.2	0.810834	4.30002e-225	1.44552e-222		IL18RAP	2q12.1	0.81692	9.52222e-197	3.19645e-194		BTLA	2	0.810834	0.82344	0.817137	2	BTLA
ICOS	2q33.2	0.810781	4.85418e-225	1.60506e-222		WAS	Xp11.23	0.814839	5.95107e-195	1.96493e-192		ICOS	2	0.810781	0.808776	0.809779	2	ICOS
GZMB	14q12	0.810557	8.05769e-225	2.62135e-222		C16ORF54	16p11.2	0.814541	1.07241e-194	3.48377e-192		GZMB	2	0.810557	0.81446	0.812509	2	GZMB
LINC00426	13q12.3	0.810488	9.4246e-225	3.01737e-222		GZMB	14q12	0.81446	1.25685e-194	4.01814e-192		LINC00426	2	0.810488	0.810288	0.810388	2	LINC00426
HCST	19q13.12	0.809918	3.41793e-224	1.07718e-221		LTA	6p21.33	0.811835	2.12858e-192	6.6987e-190		HCST	2	0.809918	0.811739	0.810829	2	HCST
SP140	2q37.1	0.809251	1.53482e-223	4.76267e-221		HCST	19q13.12	0.811739	2.56386e-192	7.94442e-190		SP140	2	0.809251	0.810293	0.809772	2	SP140
CST7	20p11.21	0.808967	2.90737e-223	8.8851e-221		GFI1	1p22.1	0.810302	4.10589e-191	1.24944e-188		CST7	2	0.808967	0.802426	0.805697	2	CST7
LTA	6p21.33	0.807954	2.80125e-222	8.43302e-220		SP140	2q37.1	0.810293	4.18008e-191	1.24944e-188		LTA	2	0.807954	0.811835	0.809895	2	LTA
PRKCQ	10p15.1	0.80455	5.15691e-219	1.52963e-216		LINC00426	13q12.3	0.810288	4.21836e-191	1.24944e-188		PRKCQ	2	0.80455	0.809962	0.807256	2	PRKCQ
C16ORF54	16p11.2	0.804455	6.34786e-219	1.8556e-216		PRKCQ	10p15.1	0.809962	7.89965e-191	2.3059e-188		C16ORF54	2	0.804455	0.814541	0.809498	2	C16ORF54
IL18RAP	2q12.1	0.804061	1.49842e-218	4.3176e-216		CTLA4	2q33.2	0.809772	1.13587e-190	3.26823e-188		IL18RAP	2	0.804061	0.81692	0.810491	2	IL18RAP
CD8B	2p11.2	0.803688	3.38095e-218	9.60476e-216		ICOS	2q33.2	0.808776	7.61057e-190	2.15894e-187		CD8B	2	0.803688	0.819608	0.811648	2	CD8B
GFI1	1p22.1	0.801091	9.20553e-216	2.57883e-213		SASH3	Xq26.1	0.806631	4.41754e-188	1.23574e-185		GFI1	2	0.801091	0.810302	0.805697	2	GFI1
PLA2G2D	1p36.12	0.800079	8.01563e-215	2.21473e-212		FASLG	1q24.3	0.80552	3.5428e-187	9.77472e-185		PLA2G2D	2	0.800079	0.803741	0.80191	2	PLA2G2D
SASH3	Xq26.1	0.800056	8.42032e-215	2.29511e-212		XCL2	1q24.2	0.805163	6.90431e-187	1.87918e-184		SASH3	2	0.800056	0.806631	0.803343	2	SASH3
CD52	1p36.11	0.799877	1.23037e-214	3.30886e-212		TNFRSF1B	1p36.22	0.805108	7.64894e-187	2.0541e-184		CD52	2	0.799877	0.804165	0.802021	2	CD52
TNFRSF1B	1p36.22	0.799328	3.95779e-214	1.05038e-211		CD3G	11q23.3	0.805019	9.02424e-187	2.39154e-184		TNFRSF1B	2	0.799328	0.805108	0.802218	2	TNFRSF1B
GZMH	14q12	0.798519	2.19185e-213	5.7415e-211		CD52	1p36.11	0.804165	4.41538e-186	1.15494e-183		GZMH	2	0.798519	0.799529	0.799024	2	GZMH
NCR3	6p21.33	0.794431	1.11877e-209	2.89301e-207		PLA2G2D	1p36.12	0.803741	9.67962e-186	2.49945e-183		NCR3	2	0.794431	0.802972	0.798701	2	NCR3
XCL2	1q24.2	0.794018	2.61742e-209	6.6827e-207		NCR3	6p21.33	0.802972	4.00129e-185	1.02013e-182		XCL2	2	0.794018	0.805163	0.799591	2	XCL2
CD3G	11q23.3	0.792273	9.37902e-208	2.36469e-205		CST7	20p11.21	0.802426	1.09014e-184	2.74457e-182		CD3G	2	0.792273	0.805019	0.798646	2	CD3G
DOK2	8p21.3	0.792148	1.20974e-207	3.0124e-205		SLAMF7	1q23.3	0.801702	4.10742e-184	1.02133e-181		DOK2	2	0.792148	0.798151	0.795149	2	DOK2
CCR7	17q21.2	0.791605	3.65217e-207	8.98344e-205		CCR5	3p21.31	0.801596	4.98602e-184	1.22468e-181		CCR7	2	0.791605	0.791647	0.791626	2	CCR7
CXCL9	4q21.1	0.79148	4.70941e-207	1.14444e-204		GZMH	14q12	0.799529	2.12697e-182	5.16135e-180		CXCL9	2	0.79148	0.795657	0.793568	2	CXCL9
FUT7	9q34.3	0.789659	1.86705e-205	4.48313e-203		DOK2	8p21.3	0.798151	2.53544e-181	6.07933e-179		FUT7	2	0.789659	0.797306	0.793482	2	FUT7
LTB	6p21.33	0.789549	2.33007e-205	5.52912e-203		FUT7	9q34.3	0.797306	1.14845e-180	2.72128e-178		LTB	2	0.789549	0.794967	0.792258	2	LTB
FASLG	1q24.3	0.789313	3.73679e-205	8.76408e-203		CXCL9	4q21.1	0.795657	2.14254e-179	5.01777e-177		FASLG	2	0.789313	0.80552	0.797417	2	FASLG
CCR5	3p21.31	0.788404	2.30663e-204	5.34767e-202		LTB	6p21.33	0.794967	7.22414e-179	1.67243e-176		CCR5	2	0.788404	0.801596	0.795	2	CCR5
SLAMF7	1q23.3	0.787708	9.24861e-204	2.11982e-201		PRKCB	16p12.2-p12.1	0.792644	4.19926e-177	9.61105e-175		SLAMF7	2	0.787708	0.801702	0.794705	2	SLAMF7
CD37	19q13.33	0.786203	1.82362e-202	4.13286e-200		TRAF3IP3	1q32.2	0.792045	1.18554e-176	2.68292e-174		CD37	2	0.786203	0.791452	0.788827	2	CD37
FCRL3	1q23.1	0.785607	5.90022e-202	1.32231e-199		FCRL3	1q23.1	0.791993	1.29752e-176	2.9037e-174		FCRL3	2	0.785607	0.791993	0.7888	2	FCRL3
TRAF3IP3	1q32.2	0.782741	1.58931e-199	3.52268e-197		CCR7	17q21.2	0.791647	2.35906e-176	5.2213e-174		TRAF3IP3	2	0.782741	0.792045	0.787393	2	TRAF3IP3
EOMES	3p24.1	0.781715	1.15304e-198	2.52792e-196		CD37	19q13.33	0.791452	3.30499e-176	7.23542e-174		EOMES	2	0.781715	0.789643	0.785679	2	EOMES
ZBED2	3q13.13	0.780654	8.86114e-198	1.92182e-195		SNX20	16q12.1	0.790057	3.63829e-175	7.87944e-173		ZBED2	1	0.780654		0.780654	1	ZBED2
TIFAB	5q31.1	0.779852	4.10649e-197	8.81148e-195		JAML	11q23.3	0.789915	4.63625e-175	9.9339e-173		TIFAB	2	0.779852	0.784295	0.782073	2	TIFAB
SNX20	16q12.1	0.779667	5.83714e-197	1.23932e-194		EOMES	3p24.1	0.789643	7.38685e-175	1.56609e-172		SNX20	2	0.779667	0.790057	0.784862	2	SNX20
IL18BP	11q13.4	0.779073	1.80756e-196	3.79775e-194		IL18BP	11q13.4	0.787533	2.66214e-173	5.58523e-171		IL18BP	2	0.779073	0.787533	0.783303	2	IL18BP
JAML	11q23.3	0.778903	2.49805e-196	5.19441e-194		CD40LG	Xq26.3	0.786533	1.43461e-172	2.9788e-170		JAML	2	0.778903	0.789915	0.784409	2	JAML
CRTAM	11q24.1	0.778441	6.0023e-196	1.23537e-193		IL2RB	22q12.3	0.785996	3.52775e-172	7.25024e-170		CRTAM	2	0.778441	0.783149	0.780795	2	CRTAM
IL2RB	22q12.3	0.778118	1.10592e-195	2.25317e-193		TIFAB	5q31.1	0.784295	6.0216e-171	1.22506e-168		IL2RB	2	0.778118	0.785996	0.782057	2	IL2RB
PRKCB	16p12.2-p12.1	0.776379	2.91764e-194	5.88488e-192		CRTAM	11q24.1	0.783149	4.0149e-170	8.0864e-168		PRKCB	2	0.776379	0.792644	0.784511	2	PRKCB
												CD40LG	1		0.786533	0.786533	1	CD40LG

## Sheet: Colorectal
Colorectal Adenocarcinoma (TCGA, Firehose Legacy)	7 Patients/Samples
Correlated Gene	Cytoband	Spearman's Correlation	p-Value	q-Value
DAPK1	9q21.33	1	0	0
GRIN1	9q34.3	1	0	0
GTPBP1	22q13.1	1	0	0
HOXB4	17q21.32	1	0	0
KCNK6	19q13.2	1	0	0
LARGE1	22q12.3	1	0	0
OTX1	2p15	1	0	0
CREG2	2q11.2	0.991031	1.45613e-05	0.0248177
ADGRB2	1p35.2	0.964286	0.000454149	0.13958
ANXA2R	5p12	0.964286	0.000454149	0.13958
ARSA	22q13.33	0.964286	0.000454149	0.13958
ATP10B	5q34	0.964286	0.000454149	0.13958
BRD1	22q13.33	0.964286	0.000454149	0.13958
CHST6	16q23.1	0.964286	0.000454149	0.13958
CUL9	6p21.1	0.964286	0.000454149	0.13958
GGA1	22q13.1	0.964286	0.000454149	0.13958
HIVEP3	1p34.2	0.964286	0.000454149	0.13958
LAMP3	3q27.1	0.964286	0.000454149	0.13958
LMF2	22q13.33	0.964286	0.000454149	0.13958
MBD1	18q21.1	0.964286	0.000454149	0.13958
MRTFA	22q13.1-q13.2	0.964286	0.000454149	0.13958
MTMR3	22q12.2	0.964286	0.000454149	0.13958
PACSIN2	22q13.2	0.964286	0.000454149	0.13958
RTN4R	22q11.21	0.964286	0.000454149	0.13958
SH2B3	12q24.12	0.964286	0.000454149	0.13958
SYTL1	1p36.11	0.964286	0.000454149	0.13958
TLE6	19p13.3	0.964286	0.000454149	0.13958
TNIP1	5q33.1	0.964286	0.000454149	0.13958
CYB5R3	22q13.2	0.964286	0.000454149	0.13958
DBH	9q34.2	0.964286	0.000454149	0.13958
EFNA5	5q21.3	0.964286	0.000454149	0.13958
SMAD3	15q22.33	0.964286	0.000454149	0.13958
TNFAIP2	14q32.32	0.964286	0.000454149	0.13958
TUBB2A	6p25.2	0.964286	0.000454149	0.13958
ZFYVE1	14q24.2	0.964286	0.000454149	0.13958
C2CD4C	19p13.3	0.928571	0.00251947	0.330315
CYP1B1-AS1	2p22.2	0.928571	0.00251947	0.330315
ESS2	22q11.21|22q11.2	0.928571	0.00251947	0.330315
FAM169B	15q26.3	0.928571	0.00251947	0.330315
GIT2	12q24.11	0.928571	0.00251947	0.330315
GM2A	5q33.1	0.928571	0.00251947	0.330315
GRB14	2q24.3	0.928571	0.00251947	0.330315
GRIN3B	19p13.3	0.928571	0.00251947	0.330315
HSD3B7	16p11.2	0.928571	0.00251947	0.330315
IL17RA	22q11.1	0.928571	0.00251947	0.330315
ISL1	5q11.1	0.928571	0.00251947	0.330315
JAKMIP3	10q26.3	0.928571	0.00251947	0.330315
LINC02035	3q21.1	0.928571	0.00251947	0.330315
LRCH1	13q14.13-q14.2	0.928571	0.00251947	0.330315
LRRK1	15q26.3	0.928571	0.00251947	0.330315
MOV10	1p13.2	0.928571	0.00251947	0.330315
NCR3	6p21.33	0.928571	0.00251947	0.330315
PPIL2	22q11.21	0.928571	0.00251947	0.330315
RIPK1	6p25.2	0.928571	0.00251947	0.330315
SFI1	22q12.2	0.928571	0.00251947	0.330315
SLC26A9	1q32.1	0.928571	0.00251947	0.330315
SP2	17q21.32	0.928571	0.00251947	0.330315
SYNE3	14q32.13	0.928571	0.00251947	0.330315
TCIRG1	11q13.2	0.928571	0.00251947	0.330315
TRAF3IP2	6q21	0.928571	0.00251947	0.330315
TRAFD1	12q24.13	0.928571	0.00251947	0.330315
ZC3H7B	22q13.2	0.928571	0.00251947	0.330315
ZFAND5	9q21.13	0.928571	0.00251947	0.330315
B4GALT1	9p21.1	0.928571	0.00251947	0.330315
VSIR	10q22.1	0.928571	0.00251947	0.330315
CABLES1	18q11.2	0.928571	0.00251947	0.330315
CTIF	18q21.1	0.928571	0.00251947	0.330315
CTSO	4q32.1	0.928571	0.00251947	0.330315
DENND6B	22q13.33	0.928571	0.00251947	0.330315
DGCR2	22q11.21	0.928571	0.00251947	0.330315
ENC1	5q13.3	0.928571	0.00251947	0.330315
FGD6	12q22	0.928571	0.00251947	0.330315
HNRNPDL	4q21.22	0.928571	0.00251947	0.330315
MARF1	16p13.11	0.928571	0.00251947	0.330315
MAP7D1	1p34.3	0.928571	0.00251947	0.330315
MED15	22q11.21	0.928571	0.00251947	0.330315
MIA2	14q13.2	0.928571	0.00251947	0.330315
N4BP1	16q12.1	0.928571	0.00251947	0.330315
PI4KA	22q11.21	0.928571	0.00251947	0.330315
RTTN	18q22.2	0.928571	0.00251947	0.330315
SLC15A4	12q24.33	0.928571	0.00251947	0.330315
SLC7A2	8p22	0.928571	0.00251947	0.330315
TCF20	22q13.2|22q13.3	0.928571	0.00251947	0.330315
TMEM106A	17q21.31	0.928571	0.00251947	0.330315
VPS13C	15q22.2	0.928571	0.00251947	0.330315
PEBP4	8p21.3	0.926562	0.00269748	0.351196
ABCB5	7p21.1	0.906327	0.00490163	0.464077
GOLGA6B	15q24.1	0.906327	0.00490163	0.464077
GRIK1	21q21.3	0.906327	0.00490163	0.464077
POM121L1P	22q11.22	0.906327	0.00490163	0.464077
ZNF295-AS1	21q22.3	0.906327	0.00490163	0.464077
SLC7A9	19q13.11	0.900937	0.00562059	0.464077
ABCA7	19p13.3	0.892857	0.00680719	0.464077
ANXA2P3	10q21.3	0.892857	0.00680719	0.464077
ARFGAP3	22q13.2	0.892857	0.00680719	0.464077
ASPHD2	22q12.1	0.892857	0.00680719	0.464077
BATF	14q24.3	0.892857	0.00680719	0.464077
BCAS1	20q13.2	0.892857	0.00680719	0.464077
BCO1	16q23.2	0.892857	0.00680719	0.464077
BCR	22q11.23	0.892857	0.00680719	0.464077
COX7B	Xq21.1	-0.892857	0.00680719	0.464077
CTU2	16q24.3	-0.892857	0.00680719	0.464077
DDT	22q11.23	-0.892857	0.00680719	0.464077
DDTL	22q11.23	-0.892857	0.00680719	0.464077
VPS26C	21q22.13	-0.892857	0.00680719	0.464077
ATPSCKMT	5p15.2	-0.892857	0.00680719	0.464077
MCRIP2	16p13.3	-0.892857	0.00680719	0.464077
HOXA11	7p15.2	-0.892857	0.00680719	0.464077
IL24	1q32.1	-0.892857	0.00680719	0.464077
LARS2	3p21.31	-0.892857	0.00680719	0.464077
MAPKAPK3	3p21.2	-0.892857	0.00680719	0.464077
COPS9	2q37.3	-0.892857	0.00680719	0.464077
NARS2	11q14.1	-0.892857	0.00680719	0.464077
NCBP2AS2	3q29	-0.892857	0.00680719	0.464077
NDUFA2	5q31.3	-0.892857	0.00680719	0.464077
NDUFAF4	6q16.1	-0.892857	0.00680719	0.464077
NDUFB2	7q34	-0.892857	0.00680719	0.464077
NDUFS8	11q13.2	-0.892857	0.00680719	0.464077
NFS1	20q11.22	-0.892857	0.00680719	0.464077
NSA2	5q13.3	-0.892857	0.00680719	0.464077
OXNAD1	3p25.1-p24.3	-0.892857	0.00680719	0.464077
PGRMC1	Xq24	-0.892857	0.00680719	0.464077
PLEKHA8	7p14.3	-0.892857	0.00680719	0.464077
PTDSS1	8q22.1	-0.892857	0.00680719	0.464077
RPIA	2p11.2	-0.892857	0.00680719	0.464077
SAYSD1	6p21.2	-0.892857	0.00680719	0.464077
SNHG10	14q32.13	-0.892857	0.00680719	0.464077
SPATC1L	21q22.3	-0.892857	0.00680719	0.464077
SPG21	15q22.31	-0.892857	0.00680719	0.464077
ST7	7q31.2	-0.892857	0.00680719	0.464077
THOC7	3p14.1	-0.892857	0.00680719	0.464077
ULK3	15q24.1	-0.892857	0.00680719	0.464077
UQCRC1	3p21.31	-0.892857	0.00680719	0.464077
USP4	3p21.31	-0.892857	0.00680719	0.464077
ZNF630	Xp11.23	-0.892857	0.00680719	0.464077
C3ORF67	3p14.2	-0.892857	0.00680719	0.464077
MTMR12	5p13.3	-0.892857	0.00680719	0.464077
SATB2	2q33.1	-0.892857	0.00680719	0.464077
SHD	19p13.3	-0.892857	0.00680719	0.464077
ZNF800	7q31.33	-0.892857	0.00680719	0.464077
LINC00643	14q23.2	-0.900937	0.00562059	0.464077
WDR38	9q33.3	-0.906327	0.00490163	0.464077
E2F4	16q22.1	-0.928571	0.00251947	0.330315
ERLIN2	8p11.23	-0.928571	0.00251947	0.330315
FUZ	19q13.33	-0.928571	0.00251947	0.330315
NIPSNAP2	7p11.2	-0.928571	0.00251947	0.330315
PPP1R14B	11q13.1	-0.928571	0.00251947	0.330315
SYCE1L	16q23.1	-0.928571	0.00251947	0.330315
APRT	16q24.3	-0.928571	0.00251947	0.330315
ATP6V0A2	12q24.31	-0.928571	0.00251947	0.330315
CUTA	6p21.32	-0.928571	0.00251947	0.330315
DLAT	11q23.1	-0.928571	0.00251947	0.330315
DNAJC19	3q26.33	-0.928571	0.00251947	0.330315
DUSP2	2q11.2	-0.928571	0.00251947	0.330315
FOXRED1	11q24.2	-0.928571	0.00251947	0.330315
HAR1A	20q13.33	-0.928571	0.00251947	0.330315
LGALSL	2p14	-0.928571	0.00251947	0.330315
METTL2B	7q32.1	-0.928571	0.00251947	0.330315
MRPL12	17q25.3	-0.928571	0.00251947	0.330315
NME2	17q21.33	-0.928571	0.00251947	0.330315
NOP14	4p16.3	-0.928571	0.00251947	0.330315
OGDHL	10q11.23	-0.928571	0.00251947	0.330315
PDHB	3p14.3	-0.928571	0.00251947	0.330315
PHYH	10p13	-0.928571	0.00251947	0.330315
PRELID2	5q32	-0.928571	0.00251947	0.330315
RTN4IP1	6q21	-0.928571	0.00251947	0.330315
SFXN4	10q26.11	-0.928571	0.00251947	0.330315
SSBP1	7q34	-0.928571	0.00251947	0.330315
STAU1	20q13.13	-0.928571	0.00251947	0.330315
THAP10	15q23	-0.928571	0.00251947	0.330315
TPRXL	3p25.1	-0.928571	0.00251947	0.330315
ZBTB10	8q21.13	-0.928571	0.00251947	0.330315
ZNRF2	7p14.3	-0.928571	0.00251947	0.330315
CYP4F8	19p13.12	-0.954994	0.000805535	0.243583
AMZ2	17q24.2	-0.964286	0.000454149	0.13958
HSPD1	2q33.1	-0.964286	0.000454149	0.13958
MARS2	2q33.1	-0.964286	0.000454149	0.13958
PRADC1	2p13.2	-0.964286	0.000454149	0.13958
SLC26A6	3p21.31	-0.964286	0.000454149	0.13958
USP27X-AS1	Xp11.23	-0.964286	0.000454149	0.13958
ADGB	6q24.3	-0.964286	0.000454149	0.13958
AVL9	7p14.3	-0.964286	0.000454149	0.13958
FMC1	7q34	-0.964286	0.000454149	0.13958
CHCHD7	8q12.1	-0.964286	0.000454149	0.13958
FARSB	2q36.1	-0.964286	0.000454149	0.13958
HCG18	6p22.1	-0.964286	0.000454149	0.13958
HSD17B12	11p11.2	-0.964286	0.000454149	0.13958
MAGT1	Xq21.1	-0.964286	0.000454149	0.13958
MPLKIP	7p14.1	-0.964286	0.000454149	0.13958
MRPS33	7q34	-0.964286	0.000454149	0.13958
NDUFB10	16p13.3	-0.964286	0.000454149	0.13958
OAZ3	1q21.3	-0.964286	0.000454149	0.13958
OXLD1	17q25.3	-0.964286	0.000454149	0.13958
QRSL1	6q21	-0.964286	0.000454149	0.13958
SDHD	11q23.1	-0.964286	0.000454149	0.13958
TCTA	3p21.31	-0.964286	0.000454149	0.13958
TYSND1	10q22.1	-0.964286	0.000454149	0.13958
ARL16	17q25.3	-1	0	0
KLF1	19p13.13	-1	0	0
MEST	7q32.2	-1	0	0

[truncated: 7 more sheets: Melanoma, Lung, Renal, Bladder, Mesothelioma, Summary Table (positive), Summary Table (negative)]
