# Supplementary material for: Molecular Mechanisms of PD-1 and PD-L1 Activity on a Pan-Cancer Basis: A Bioinformatic Exploratory Study
Source: Int J Mol Sci. 2021 May 22;22(11):5478. doi: 10.3390/ijms22115478 (PMC8196980; doi:10.3390/ijms22115478)
Supplement: Supplementary file 1 [file ijms-22-05478-s001.zip › File S3.xlsx]

## Sheet: Positive Gene List
Gene	no of cancers gene correlates with PDCD1	Average Corrlation
CD3E	13	0.830024
CD2	13	0.829192
CD3D	13	0.826461
CD8A	13	0.82624
TIGIT	13	0.82253
SIT1	13	0.8169
CD27	13	0.801888
SH2D1A	13	0.795853
CD5	13	0.77046
ICOS	13	0.770154
SLA2	12	0.833252
CXCR6	12	0.823023
ACAP1	12	0.822344
CD7	12	0.817081
CXCR3	12	0.811367
PTPRCAP	12	0.807734
ARHGAP9	12	0.806992
SASH3	12	0.797461
RASAL3	12	0.795083
CTLA4	12	0.784672
TRAT1	12	0.768518
SIRPG	11	0.861066
TBC1D10C	11	0.838791
NKG7	11	0.830153
TBX21	11	0.82479
UBASH3A	11	0.816863
CD247	11	0.811092
PTPN7	11	0.810393
SLAMF6	11	0.810091
CCR5	11	0.799839
PRF1	11	0.798721
ZAP70	11	0.79726
CD6	11	0.796364
WAS	11	0.792797
CD3G	11	0.792468
PYHIN1	11	0.780374
ZNF831	11	0.772888
SLAMF1	11	0.762536
GZMK	11	0.758749
IL12RB1	10	0.812629
ITGAL	10	0.807983
FASLG	10	0.806928
CORO1A	10	0.806191
IL2RB	10	0.803737
CCL5	10	0.798061
GPR171	10	0.79786
GZMH	10	0.794488
CD48	10	0.788039
KLRK1	10	0.782323
CST7	10	0.781016
ITK	10	0.778543
TRAF3IP3	10	0.774674
CD96	10	0.771946
GZMM	10	0.770537
CD8B	10	0.767877
LAG3	9	0.826161
IL21R	9	0.816183
IL2RG	9	0.804851
GZMA	9	0.80095
HCST	9	0.799102
PSTPIP1	9	0.795403
LCK	9	0.777917
JAKMIP1	8	0.841761
SEPTIN1	8	0.820068
MAP4K1	8	0.818562
GZMB	8	0.805396
IFNG	8	0.793991
P2RY10	8	0.782543
GIMAP5	8	0.777794
IKZF1	8	0.777064
LINC00426	8	0.757466
LTA	8	0.738883
CRTAM	7	0.788392
GBP5	7	0.784801
IL10RA	7	0.778886
RHOH	7	0.776987
SP140	7	0.769334
SNX20	7	0.768366
TESPA1	7	0.74955
ABI3	7	0.745515
SPN	6	0.807229
BIN2	6	0.795237
GPR174	6	0.789335
NLRC3	6	0.787864
CXCL9	6	0.776803
GRAP2	6	0.762969
PVRIG	6	0.762499
FAM78A	6	0.762322
CD37	6	0.759892
CXCL13	6	0.752496
THEMIS	6	0.74496
LY9	6	0.736342
PLA2G2D	6	0.728779
SLA	5	0.813596
FERMT3	5	0.795247
IL18BP	5	0.795024
MYO1G	5	0.794294
SELPLG	5	0.79132
CD52	5	0.785297
CXCR2P1	5	0.784728
EBI3	5	0.778644
SCML4	5	0.777841
CTSW	5	0.775957
RTP5	5	0.770879
C1QB	5	0.769192
DOK2	5	0.76217
S1PR4	5	0.761196
SAMD3	5	0.750835
CYTIP	5	0.745098
IRF4	5	0.71956
PTPRC	4	0.823546
CD74	4	0.818471
CCL4	4	0.814353
CD226	4	0.813925
ZBED2	4	0.805584
HLA-DPB1	4	0.801042
BATF	4	0.80038
MYO1F	4	0.798424
NCF1	4	0.792545
ZBP1	4	0.791913
TNFRSF1B	4	0.790802
CD53	4	0.788084
CD72	4	0.787598
BTLA	4	0.784078
PARVG	4	0.781748
FCRL3	4	0.779886
GPR18	4	0.779532
C1QA	4	0.775045
GVINP1	4	0.771149
ARHGAP15	4	0.768912
SLAMF8	4	0.761063
GFI1	4	0.759834
GIMAP1	4	0.75711
LCP2	4	0.754153
JAK3	4	0.753607
TMC8	4	0.753575
CALHM6	4	0.751928
SLAMF7	4	0.747345
ASB2	4	0.74494
CCR7	4	0.739773
FOXP3	4	0.733173
GIMAP4	4	0.730985
SPOCK2	3	0.844608
CIITA	3	0.834896
IRF1	3	0.826567
C16ORF54	3	0.826422
PTPN22	3	0.825085
SAMSN1	3	0.806009
KLRD1	3	0.803781
GPR65	3	0.799442
LAT	3	0.792087
ARHGAP30	3	0.788685
NCKAP1L	3	0.778809
STAT4	3	0.778507
TTC24	3	0.767029
EOMES	3	0.766137
AKNA	3	0.75918
RAC2	3	0.757975
SH2D2A	3	0.757228
PRKCB	3	0.755246
GIMAP7	3	0.754031
CARMIL2	3	0.7491
IL18RAP	3	0.73539
TIFAB	3	0.733421
HAPLN3	3	0.695588
NCR3	2	0.863636
XCL2	2	0.837504
NFAM1	2	0.835309
SYTL1	2	0.834057
APOL3	2	0.830536
HAVCR2	2	0.823574
ZNF683	2	0.819893
LILRB2	2	0.818691
AIF1	2	0.8176
CYTH4	2	0.815196
DOCK2	2	0.812921
NLRC5	2	0.809834
PCED1B	2	0.809102
LST1	2	0.807377
EVI2B	2	0.803196
LTB	2	0.795602
DUSP2	2	0.793169
TARP	2	0.790373
KLHDC7B	2	0.790262
CARD11	2	0.789808
SIGLEC10	2	0.787054
LAPTM5	2	0.784106
RUNX3	2	0.783329
GPSM3	2	0.781027
GNGT2	2	0.776271
HCLS1	2	0.775176
GBP4	2	0.771036
FCER1G	2	0.770785
APOBEC3G	2	0.767806
DEF6	2	0.767189
KLHL6	2	0.764051
SUSD3	2	0.762848
PRKCQ	2	0.761128
RCSD1	2	0.759028
CD40LG	2	0.7529
FGD3	2	0.749879
ABCD2	2	0.74847
LOC606724	2	0.747876
TYMP	2	0.737467
FMNL1	2	0.730541
MEI1	2	0.711378
LIMD2	2	0.71128
NCF1C	2	0.708031
MCOLN2	2	0.707825
BCL11B	2	0.690016
SEMA4A	2	0.685303
PCED1B-AS1	2	0.682559
AGAP2	2	0.677816
AIM2	2	0.671157
DAPK1	1	1
GRIN1	1	1
GTPBP1	1	1
HOXB4	1	1
KCNK6	1	1
LARGE1	1	1
OTX1	1	1
CREG2	1	0.991031
ADGRB2	1	0.964286
ANXA2R	1	0.964286
ARSA	1	0.964286
ATP10B	1	0.964286
BRD1	1	0.964286
CHST6	1	0.964286
CUL9	1	0.964286
GGA1	1	0.964286
HIVEP3	1	0.964286
LAMP3	1	0.964286
LMF2	1	0.964286
MBD1	1	0.964286
MRTFA	1	0.964286
MTMR3	1	0.964286
PACSIN2	1	0.964286
RTN4R	1	0.964286
SH2B3	1	0.964286
TLE6	1	0.964286
TNIP1	1	0.964286
CYB5R3	1	0.964286
DBH	1	0.964286
EFNA5	1	0.964286
SMAD3	1	0.964286
TNFAIP2	1	0.964286
TUBB2A	1	0.964286
ZFYVE1	1	0.964286
C2CD4C	1	0.928571
CYP1B1-AS1	1	0.928571
ESS2	1	0.928571
FAM169B	1	0.928571
GIT2	1	0.928571
GM2A	1	0.928571
GRB14	1	0.928571
GRIN3B	1	0.928571
HSD3B7	1	0.928571
IL17RA	1	0.928571
ISL1	1	0.928571
JAKMIP3	1	0.928571
LINC02035	1	0.928571
LRCH1	1	0.928571
LRRK1	1	0.928571
MOV10	1	0.928571
PPIL2	1	0.928571
RIPK1	1	0.928571
SFI1	1	0.928571
SLC26A9	1	0.928571
SP2	1	0.928571
SYNE3	1	0.928571
TCIRG1	1	0.928571
TRAF3IP2	1	0.928571
TRAFD1	1	0.928571
ZC3H7B	1	0.928571
ZFAND5	1	0.928571
B4GALT1	1	0.928571
VSIR	1	0.928571
CABLES1	1	0.928571
CTIF	1	0.928571
CTSO	1	0.928571
DENND6B	1	0.928571
DGCR2	1	0.928571
ENC1	1	0.928571
FGD6	1	0.928571
HNRNPDL	1	0.928571
MARF1	1	0.928571
MAP7D1	1	0.928571
MED15	1	0.928571
MIA2	1	0.928571
N4BP1	1	0.928571
PI4KA	1	0.928571
RTTN	1	0.928571
SLC15A4	1	0.928571
SLC7A2	1	0.928571
TCF20	1	0.928571
TMEM106A	1	0.928571
VPS13C	1	0.928571
PEBP4	1	0.926562
IL32	1	0.907173
ABCB5	1	0.906327
GOLGA6B	1	0.906327
GRIK1	1	0.906327
POM121L1P	1	0.906327
ZNF295-AS1	1	0.906327
SLC7A9	1	0.900937
ABCA7	1	0.892857
ANXA2P3	1	0.892857
ARFGAP3	1	0.892857
ASPHD2	1	0.892857
BCAS1	1	0.892857
BCO1	1	0.892857
BCR	1	0.892857
VAV1	1	0.878973
FGD2	1	0.878636
ASCL2	1	0.875991
PTPN6	1	0.875387
PLEK	1	0.854191
TNFSF13B	1	0.852877
TNFAIP8L2	1	0.851485
IL21R-AS1	1	0.850852
SPI1	1	0.84737
LSP1	1	0.843187
AOAH	1	0.840973
ITGB2	1	0.840935
IL2RA	1	0.840337
TNFRSF9	1	0.838904
HCK	1	0.835452
LILRB4	1	0.834956
RASSF5	1	0.834495
C5ORF56	1	0.83138
C1QC	1	0.829891
HLA-DMB	1	0.825879
LAT2	1	0.824847
IRF8	1	0.824573
PIK3R5	1	0.823413
HLA-DMA	1	0.819125
HLA-DOB	1	0.818199
GNA15	1	0.814985
HLA-DRA	1	0.811972
UNC13D	1	0.811207
HLA-DPA1	1	0.809889
OSCAR	1	0.808171
SECTM1	1	0.805231
CD300A	1	0.804145
CD86	1	0.803395
SDS	1	0.801513
CARD9	1	0.801356
NELL2	1	0.797875
PLCB2	1	0.797153
ITGAX	1	0.795952
CD300LF	1	0.794837
FUT7	1	0.793482
LY86	1	0.790273
GPR25	1	0.788718
LCP1	1	0.788534
IDO1	1	0.787475
RGS10	1	0.786594
C1ORF162	1	0.786485
LAIR1	1	0.785199
JAML	1	0.784409
TOX	1	0.783656
BCL2A1	1	0.78234
ODF3B	1	0.779623
APOC1	1	0.777676
FCGR1B	1	0.776298
DOK3	1	0.776214
TYROBP	1	0.774377
CD68	1	0.773334
TAP1	1	0.768839
ATP1A3	1	0.768806
ST8SIA1	1	0.765502
ZBTB32	1	0.760927
DTHD1	1	0.757758
APOBEC3D	1	0.757247
P2RX5	1	0.751395
PIK3CD	1	0.745093
C11ORF21	1	0.744265
APBB1IP	1	0.74068
RASGRP2	1	0.737675
FCGR1A	1	0.737384
APOBEC3F	1	0.731623
FCMR	1	0.728714
P2RY8	1	0.727901
IPCEF1	1	0.727511
RBP5	1	0.725775
SMAP2	1	0.725648
CD79B	1	0.724546
IL4I1	1	0.724437
ITGB7	1	0.723175
MIR155HG	1	0.720953
GAB3	1	0.720758
TRBV5-1	1	0.720486
POU2AF1	1	0.720248
LPXN	1	0.71927
TRBV19	1	0.71819
TNFRSF18	1	0.715541
CXCL10	1	0.714702
TRBV9	1	0.71374
MZB1	1	0.713591
NCF1B	1	0.710968
MIAT	1	0.70975
GBP1	1	0.708843
ADORA2A	1	0.708587
TRAV14DV4	1	0.708469
RASGRP1	1	0.707241
GPR132	1	0.706129
SEMA4D	1	0.705594
BMS1P20	1	0.705211
FCRL6	1	0.704015
TLR10	1	0.703693
CD79A	1	0.703663
BTK	1	0.702177
CD70	1	0.701199
IGFLR1	1	0.700453
LINC01281	1	0.696719
ARHGAP25	1	0.695174
RGL4	1	0.69471
TRBV5-4	1	0.688516
CXCL11	1	0.686543
LILRB1	1	0.684267
TRBV3-1	1	0.682115
ITM2A	1	0.678571
APOBEC3H	1	0.676516
UBD	1	0.655556
ANKRD22	1	0.652537
CD244	1	0.649426
SLFN12L	1	0.643521
GMFG	1	0.626413
SYTL2	1	0.621472
RAB39B	1	0.620674
GNG4	1	0.61637
LOC100128288	1	0.614525
ACSL6	1	0.606057
EXOC3L4	1	0.605306
RIN3	1	0.604972
LINC00158	1	0.604005

## Sheet: DAVID Functional Annotati
ID	Gene Name	Species	BBID	BIOCARTA	COG_ONTOLOGY	GOTERM_BP_DIRECT	GOTERM_CC_DIRECT	GOTERM_MF_DIRECT	INTERPRO	KEGG_PATHWAY	OMIM_DISEASE	PIR_SUPERFAMILY	SMART	UP_KEYWORDS	UP_SEQ_FEATURE
ACAP1	ArfGAP with coiled-coil, ankyrin repeat and PH domains 1(ACAP1)	Homo sapiens				GO:0015031~protein transport,GO:0043547~positive regulation of GTPase activity,	GO:0016020~membrane,GO:0055038~recycling endosome membrane,	GO:0005096~GTPase activator activity,GO:0005515~protein binding,GO:0046872~metal ion binding,	IPR000909:Phospholipase C, phosphatidylinositol-specific , X domain,IPR001164:Arf GTPase activating protein,IPR001849:Pleckstrin homology domain,IPR002110:Ankyrin repeat,IPR011993:Pleckstrin homology-like domain,IPR020683:Ankyrin repeat-containing domain,IPR027267:Arfaptin homology (AH) domain/BAR domain,	hsa04144:Endocytosis,			SM00105:ArfGap,SM00233:PH,SM00248:ANK,	3D-structure,ANK repeat,Complete proteome,Endosome,GTPase activation,Membrane,Metal-binding,Nitration,Phosphoprotein,Polymorphism,Protein transport,Proteomics identification,Reference proteome,Repeat,Transport,Zinc,Zinc-finger,	chain:Arf-GAP with coiled-coil, ANK repeat and PH domain-containing protein 1,domain:Arf-GAP,domain:BAR,domain:PH,modified residue,mutagenesis site,region of interest:Required for formation of endosomal tubules when overexpressed with PIP5K1C,region of interest:Required for interaction with GULP1,repeat:ANK 1,repeat:ANK 2,repeat:ANK 3,sequence variant,zinc finger region:C4-type,
CCL5	C-C motif chemokine ligand 5(CCL5)	Homo sapiens	109.Chemokine_families,18.Cytokine_astocytes,22.Cytokine-chemokine_CNS,33.GProt-coupled_Rec_T_Cell_med_Inflamm,34.Chemokines_in_EAE,	h_eosinophilsPathway:The Role of Eosinophils in the Chemokine Network of Allergy,		GO:0000165~MAPK cascade,GO:0002407~dendritic cell chemotaxis,GO:0002548~monocyte chemotaxis,GO:0002676~regulation of chronic inflammatory response,GO:0006816~calcium ion transport,GO:0006874~cellular calcium ion homeostasis,GO:0006887~exocytosis,GO:0006935~chemotaxis,GO:0006954~inflammatory response,GO:0006955~immune response,GO:0007159~leukocyte cell-cell adhesion,GO:0007186~G-protein coupled re…	GO:0005576~extracellular region,GO:0005615~extracellular space,GO:0005737~cytoplasm,	GO:0004435~phosphatidylinositol phospholipase C activity,GO:0004672~protein kinase activity,GO:0005515~protein binding,GO:0008009~chemokine activity,GO:0016004~phospholipase activator activity,GO:0030298~receptor signaling protein tyrosine kinase activator activity,GO:0031726~CCR1 chemokine receptor binding,GO:0031729~CCR4 chemokine receptor binding,GO:0031730~CCR5 chemokine receptor binding,GO:0…	IPR000827:CC chemokine, conserved site,IPR001811:Chemokine interleukin-8-like domain,	hsa04060:Cytokine-cytokine receptor interaction,hsa04062:Chemokine signaling pathway,hsa04620:Toll-like receptor signaling pathway,hsa04621:NOD-like receptor signaling pathway,hsa04623:Cytosolic DNA-sensing pathway,hsa04668:TNF signaling pathway,hsa05020:Prion diseases,hsa05120:Epithelial cell signaling in Helicobacter pylori infection,hsa05142:Chagas disease (American trypanosomiasis),hsa05164:I…	HIV-1 disease, delayed progression of~HIV-1 disease, delayed progression of,HIV-1 disease, rapid progression of~HIV-1 disease, rapid progression of,		SM00199:SCY,	3D-structure,Chemotaxis,Complete proteome,Cytokine,Direct protein sequencing,Disulfide bond,Glycoprotein,Inflammatory response,Oxidation,Polymorphism,Proteomics identification,Reference proteome,Secreted,Signal,	chain:C-C motif chemokine 5,chain:RANTES(3-68),chain:RANTES(4-68),disulfide bond,glycosylation site:O-linked (GalNAc...); partial,helix,sequence conflict,sequence variant,signal peptide,site:Cleavage; by DPP4,site:Susceptible to oxidation,strand,
CCR5	C-C motif chemokine receptor 5 (gene/pseudogene)(CCR5)	Homo sapiens	14.chemokine_receptor-ligand,15.T-cell_polarization-chemokine_receptors,16.Chemokines-rec-T-cells,	h_ccr5Pathway:Pertussis toxin-insensitive CCR5 Signaling in Macrophage,h_il12Pathway:IL12 and Stat4 Dependent Signaling Pathway in Th1 Development,h_nktPathway:Selective expression of chemokine receptors during T-cell polarization,h_no2il12Pathway:NO2-dependent IL 12 Pathway in NK cells,h_tcapoptosisPathway:HIV Induced T Cell Apoptosis,		GO:0000165~MAPK cascade,GO:0002407~dendritic cell chemotaxis,GO:0006816~calcium ion transport,GO:0006935~chemotaxis,GO:0006954~inflammatory response,GO:0006955~immune response,GO:0006968~cellular defense response,GO:0007166~cell surface receptor signaling pathway,GO:0007186~G-protein coupled receptor signaling pathway,GO:0007204~positive regulation of cytosolic calcium ion concentration,GO:000726…	GO:0005737~cytoplasm,GO:0005768~endosome,GO:0005886~plasma membrane,GO:0005887~integral component of plasma membrane,GO:0009897~external side of plasma membrane,GO:0009986~cell surface,GO:0016021~integral component of membrane,	GO:0001618~virus receptor activity,GO:0003779~actin binding,GO:0004435~phosphatidylinositol phospholipase C activity,GO:0004930~G-protein coupled receptor activity,GO:0004950~chemokine receptor activity,GO:0005515~protein binding,GO:0015026~coreceptor activity,GO:0016493~C-C chemokine receptor activity,GO:0019957~C-C chemokine binding,GO:0071791~chemokine (C-C motif) ligand 5 binding,	IPR000276:G protein-coupled receptor, rhodopsin-like,IPR000355:Chemokine receptor family,IPR002240:CC chemokine receptor 5,IPR017452:GPCR, rhodopsin-like, 7TM,	hsa04060:Cytokine-cytokine receptor interaction,hsa04062:Chemokine signaling pathway,hsa04144:Endocytosis,hsa05145:Toxoplasmosis,hsa05203:Viral carcinogenesis,	609532~Hepatitis C virus, resistance to,610379~West nile virus, susceptibility to,612522~Diabetes mellitus, insulin-dependent, 22,HIV infection, susceptibility/resistance to~HIV infection, susceptibility/resistance to,		SM01381:SM01381,	3D-structure,Cell membrane,Complete proteome,Diabetes mellitus,Disulfide bond,G-protein coupled receptor,Glycoprotein,Host cell receptor for virus entry,Host-virus interaction,Lipoprotein,Membrane,Palmitate,Phosphoprotein,Polymorphism,Receptor,Reference proteome,Signal,Sulfation,Transducer,Transmembrane,Transmembrane helix,	chain:C-C chemokine receptor type 5,disulfide bond,glycosylation site:O-linked (GalNAc...),helix,lipid moiety-binding region:S-palmitoyl cysteine,modified residue,mutagenesis site,sequence variant,strand,topological domain:Cytoplasmic,topological domain:Extracellular,transmembrane region,turn,
CXCR3	C-X-C motif chemokine receptor 3(CXCR3)	Homo sapiens	14.chemokine_receptor-ligand,15.T-cell_polarization-chemokine_receptors,16.Chemokines-rec-T-cells,	h_il12Pathway:IL12 and Stat4 Dependent Signaling Pathway in Th1 Development,h_mCalpainPathway:mCalpain and friends in Cell motility,h_nktPathway:Selective expression of chemokine receptors during T-cell polarization,h_no2il12Pathway:NO2-dependent IL 12 Pathway in NK cells,		GO:0001525~angiogenesis,GO:0001937~negative regulation of endothelial cell proliferation,GO:0002685~regulation of leukocyte migration,GO:0006915~apoptotic process,GO:0006928~movement of cell or subcellular component,GO:0006935~chemotaxis,GO:0006954~inflammatory response,GO:0007155~cell adhesion,GO:0007166~cell surface receptor signaling pathway,GO:0007186~G-protein coupled receptor signaling path…	GO:0005737~cytoplasm,GO:0005886~plasma membrane,GO:0005887~integral component of plasma membrane,GO:0009897~external side of plasma membrane,GO:0016021~integral component of membrane,	GO:0004872~receptor activity,GO:0004950~chemokine receptor activity,GO:0016494~C-X-C chemokine receptor activity,GO:0019956~chemokine binding,GO:0019958~C-X-C chemokine binding,	IPR000276:G protein-coupled receptor, rhodopsin-like,IPR000355:Chemokine receptor family,IPR004070:CXC chemokine receptor 3,IPR017452:GPCR, rhodopsin-like, 7TM,	hsa04060:Cytokine-cytokine receptor interaction,hsa04062:Chemokine signaling pathway,				Alternative splicing,Angiogenesis,Apoptosis,Cell membrane,Chemotaxis,Complete proteome,Disulfide bond,G-protein coupled receptor,Glycoprotein,Membrane,Polymorphism,Receptor,Reference proteome,Sulfation,Transducer,Transmembrane,Transmembrane helix,	chain:C-X-C chemokine receptor type 3,disulfide bond,glycosylation site:N-linked (GlcNAc...),sequence conflict,sequence variant,splice variant,topological domain:Cytoplasmic,topological domain:Extracellular,transmembrane region,
CXCR6	C-X-C motif chemokine receptor 6(CXCR6)	Homo sapiens				GO:0006935~chemotaxis,GO:0006954~inflammatory response,GO:0007186~G-protein coupled receptor signaling pathway,GO:0019079~viral genome replication,GO:0070098~chemokine-mediated signaling pathway,	GO:0005886~plasma membrane,GO:0005887~integral component of plasma membrane,GO:0016021~integral component of membrane,	GO:0004930~G-protein coupled receptor activity,GO:0015026~coreceptor activity,GO:0016494~C-X-C chemokine receptor activity,GO:0019958~C-X-C chemokine binding,	IPR000276:G protein-coupled receptor, rhodopsin-like,IPR000355:Chemokine receptor family,IPR002235:CXC chemokine receptor 6,IPR017452:GPCR, rhodopsin-like, 7TM,	hsa04060:Cytokine-cytokine receptor interaction,hsa04062:Chemokine signaling pathway,				Cell membrane,Complete proteome,Disulfide bond,G-protein coupled receptor,Glycoprotein,Membrane,Polymorphism,Receptor,Reference proteome,Transducer,Transmembrane,Transmembrane helix,	chain:C-X-C chemokine receptor type 6,disulfide bond,glycosylation site:N-linked (GlcNAc...),sequence variant,topological domain:Cytoplasmic,topological domain:Extracellular,transmembrane region,
CD2	CD2 molecule(CD2)	Homo sapiens	150.caspase_and_NFKB_activation,7.IL17_hematopoesis,81.Structure_of_Caps_and_SMACs,90.IB_and-cat-Arm_processing_of_Ci,99.NF-kB_activation,	h_dcPathway:Dendritic cells in regulating TH1 and TH2 Development,h_il17Pathway:IL 17 Signaling Pathway,h_no2il12Pathway:NO2-dependent IL 12 Pathway in NK cells,h_stathminPathway:Stathmin and breast cancer resistance to antimicrotubule agents,h_tcytotoxicPathway:T Cytotoxic Cell Surface Molecules,h_thelperPathway:T Helper Cell Surface Molecules,		GO:0001766~membrane raft polarization,GO:0006915~apoptotic process,GO:0007155~cell adhesion,GO:0007166~cell surface receptor signaling pathway,GO:0016337~single organismal cell-cell adhesion,GO:0030101~natural killer cell activation,GO:0030887~positive regulation of myeloid dendritic cell activation,GO:0032760~positive regulation of tumor necrosis factor production,GO:0034113~heterotypic cell-cel…	GO:0005576~extracellular region,GO:0005886~plasma membrane,GO:0005887~integral component of plasma membrane,GO:0005911~cell-cell junction,GO:0009897~external side of plasma membrane,GO:0009898~cytoplasmic side of plasma membrane,GO:0009986~cell surface,GO:0016021~integral component of membrane,GO:0046658~anchored component of plasma membrane,	GO:0004872~receptor activity,GO:0005102~receptor binding,GO:0005515~protein binding,GO:0042803~protein homodimerization activity,	IPR007110:Immunoglobulin-like domain,IPR008424:Immunoglobulin C2-set,IPR013106:Immunoglobulin V-set,IPR013783:Immunoglobulin-like fold,IPR015632:T-cell adhesion molecule CD2,	hsa04514:Cell adhesion molecules (CAMs),hsa04640:Hematopoietic cell lineage,				3D-structure,Cell adhesion,Complete proteome,Disulfide bond,Glycoprotein,Immunoglobulin domain,Membrane,Polymorphism,Proteomics identification,Receptor,Reference proteome,Repeat,Signal,Transmembrane,Transmembrane helix,	chain:T-cell surface antigen CD2,compositionally biased region:Pro-rich,disulfide bond,domain:Ig-like C2-type,domain:Ig-like V-type,glycosylation site:N-linked (GlcNAc...),helix,mutagenesis site,region of interest:LFA-3 (CD58) binding region 1,region of interest:LFA-3 (CD58) binding region 2,sequence conflict,sequence variant,signal peptide,strand,topological domain:Cytoplasmic,topological domain…
CD247	CD247 molecule(CD247)	Homo sapiens		h_cskPathway:Activation of Csk by cAMP-dependent Protein Kinase Inhibits Signaling through the T Cell Receptor,h_ctla4Pathway:The Co-Stimulatory Signal During T-cell Activation,h_ctlPathway:CTL mediated immune response against target cells ,h_il12Pathway:IL12 and Stat4 Dependent Signaling Pathway in Th1 Development,h_il17Pathway:IL 17 Signaling Pathway,h_no2il12Pathway:NO2-dependent IL 12 Pathway…		GO:0007166~cell surface receptor signaling pathway,GO:0016032~viral process,GO:0031295~T cell costimulation,GO:0038096~Fc-gamma receptor signaling pathway involved in phagocytosis,GO:0050690~regulation of defense response to virus by virus,GO:0050776~regulation of immune response,GO:0050852~T cell receptor signaling pathway,	GO:0005737~cytoplasm,GO:0005886~plasma membrane,GO:0016020~membrane,GO:0016021~integral component of membrane,GO:0042101~T cell receptor complex,GO:0042105~alpha-beta T cell receptor complex,	GO:0004888~transmembrane signaling receptor activity,GO:0005515~protein binding,GO:0042802~identical protein binding,GO:0042803~protein homodimerization activity,	IPR003110:Phosphorylated immunoreceptor signaling ITAM,IPR021663:T-cell surface glycoprotein CD3 zeta/eta subunit/High affinity IgE receptor gamma subunit,IPR024128:T-cell surface glycoprotein CD3 zeta/eta subunit,	hsa04650:Natural killer cell mediated cytotoxicity,hsa04660:T cell receptor signaling pathway,hsa05142:Chagas disease (American trypanosomiasis),	610163~Immunodeficiency 25,		SM00077:ITAM,	3D-structure,Alternative splicing,Complete proteome,Disulfide bond,Host-virus interaction,Membrane,Phosphoprotein,Receptor,Reference proteome,Repeat,Signal,Transmembrane,Transmembrane helix,	chain:T-cell surface glycoprotein CD3 zeta chain,disulfide bond,domain:ITAM 1,domain:ITAM 2,domain:ITAM 3,helix,modified residue,sequence conflict,signal peptide,splice variant,topological domain:Cytoplasmic,topological domain:Extracellular,transmembrane region,
CD27	CD27 molecule(CD27)	Homo sapiens				GO:0006954~inflammatory response,GO:0006955~immune response,GO:0007166~cell surface receptor signaling pathway,GO:0007420~brain development,GO:0008588~release of cytoplasmic sequestered NF-kappaB,GO:0008625~extrinsic apoptotic signaling pathway via death domain receptors,GO:0016064~immunoglobulin mediated immune response,GO:0032496~response to lipopolysaccharide,GO:0033209~tumor necrosis factor-m…	GO:0005576~extracellular region,GO:0005634~nucleus,GO:0005886~plasma membrane,GO:0005887~integral component of plasma membrane,GO:0009897~external side of plasma membrane,GO:0043005~neuron projection,GO:0070062~extracellular exosome,	GO:0004888~transmembrane signaling receptor activity,GO:0005031~tumor necrosis factor-activated receptor activity,GO:0005515~protein binding,GO:0043027~cysteine-type endopeptidase inhibitor activity involved in apoptotic process,	IPR001368:TNFR/NGFR cysteine-rich region,IPR022328:Tumour necrosis factor receptor 7,	hsa04060:Cytokine-cytokine receptor interaction,	615122~Lymphoproliferative syndrome 2,		SM00208:TNFR,	Apoptosis,Complete proteome,Direct protein sequencing,Disease mutation,Disulfide bond,Glycoprotein,Membrane,Phosphoprotein,Polymorphism,Receptor,Reference proteome,Repeat,Signal,Transmembrane,Transmembrane helix,	chain:CD27 antigen,disulfide bond,glycosylation site:N-linked (GlcNAc...),modified residue,repeat:TNFR-Cys 1,repeat:TNFR-Cys 2,repeat:TNFR-Cys 3,sequence variant,signal peptide,topological domain:Cytoplasmic,topological domain:Extracellular,transmembrane region,
CD3D	CD3d molecule(CD3D)	Homo sapiens		h_cskPathway:Activation of Csk by cAMP-dependent Protein Kinase Inhibits Signaling through the T Cell Receptor,h_ctla4Pathway:The Co-Stimulatory Signal During T-cell Activation,h_ctlPathway:CTL mediated immune response against target cells ,h_il12Pathway:IL12 and Stat4 Dependent Signaling Pathway in Th1 Development,h_il17Pathway:IL 17 Signaling Pathway,h_no2il12Pathway:NO2-dependent IL 12 Pathway…	General function prediction only,	GO:0007166~cell surface receptor signaling pathway,GO:0030217~T cell differentiation,GO:0031295~T cell costimulation,GO:0045059~positive thymic T cell selection,GO:0045944~positive regulation of transcription from RNA polymerase II promoter,GO:0050776~regulation of immune response,GO:0050852~T cell receptor signaling pathway,	GO:0005737~cytoplasm,GO:0005886~plasma membrane,GO:0016021~integral component of membrane,GO:0042101~T cell receptor complex,GO:0042105~alpha-beta T cell receptor complex,	GO:0003713~transcription coactivator activity,GO:0004888~transmembrane signaling receptor activity,GO:0046982~protein heterodimerization activity,	IPR003110:Phosphorylated immunoreceptor signaling ITAM,IPR007110:Immunoglobulin-like domain,IPR013783:Immunoglobulin-like fold,IPR015484:CD3 protein, gamma/delta subunit,IPR015485:CD3 signaling complex delta subunit,	hsa04640:Hematopoietic cell lineage,hsa04660:T cell receptor signaling pathway,hsa05142:Chagas disease (American trypanosomiasis),hsa05162:Measles,hsa05166:HTLV-I infection,hsa05340:Primary immunodeficiency,	615617~Immunodeficiency 19,		SM00077:ITAM,	3D-structure,Alternative splicing,Complete proteome,Direct protein sequencing,Disulfide bond,Glycoprotein,Membrane,Phosphoprotein,Polymorphism,Proteomics identification,Receptor,Reference proteome,SCID,Signal,Transmembrane,Transmembrane helix,	chain:T-cell surface glycoprotein CD3 delta chain,disulfide bond,domain:ITAM,glycosylation site:N-linked (GlcNAc...),helix,modified residue,sequence variant,signal peptide,strand,topological domain:Cytoplasmic,topological domain:Extracellular,transmembrane region,
CD3E	CD3e molecule(CD3E)	Homo sapiens		h_cskPathway:Activation of Csk by cAMP-dependent Protein Kinase Inhibits Signaling through the T Cell Receptor,h_ctla4Pathway:The Co-Stimulatory Signal During T-cell Activation,h_ctlPathway:CTL mediated immune response against target cells ,h_il12Pathway:IL12 and Stat4 Dependent Signaling Pathway in Th1 Development,h_il17Pathway:IL 17 Signaling Pathway,h_no2il12Pathway:NO2-dependent IL 12 Pathway…		GO:0002669~positive regulation of T cell anergy,GO:0006461~protein complex assembly,GO:0007166~cell surface receptor signaling pathway,GO:0007169~transmembrane receptor protein tyrosine kinase signaling pathway,GO:0007172~signal complex assembly,GO:0007186~G-protein coupled receptor signaling pathway,GO:0007584~response to nutrient,GO:0010628~positive regulation of gene expression,GO:0010629~nega…	GO:0001772~immunological synapse,GO:0005886~plasma membrane,GO:0005887~integral component of plasma membrane,GO:0005911~cell-cell junction,GO:0009897~external side of plasma membrane,GO:0016021~integral component of membrane,GO:0042101~T cell receptor complex,GO:0042105~alpha-beta T cell receptor complex,	GO:0004888~transmembrane signaling receptor activity,GO:0005057~receptor signaling protein activity,GO:0005515~protein binding,GO:0017124~SH3 domain binding,GO:0019901~protein kinase binding,GO:0030159~receptor signaling complex scaffold activity,GO:0042608~T cell receptor binding,GO:0046982~protein heterodimerization activity,	IPR003110:Phosphorylated immunoreceptor signaling ITAM,IPR003598:Immunoglobulin subtype 2,IPR007110:Immunoglobulin-like domain,IPR013783:Immunoglobulin-like fold,IPR015484:CD3 protein, gamma/delta subunit,	hsa04640:Hematopoietic cell lineage,hsa04660:T cell receptor signaling pathway,hsa05142:Chagas disease (American trypanosomiasis),hsa05162:Measles,hsa05166:HTLV-I infection,hsa05340:Primary immunodeficiency,	615615~Immunodeficiency 18,615615~Immunodeficiency 18, SCID variant,		SM00077:ITAM,SM00408:IGc2,	3D-structure,Cell membrane,Complete proteome,Disulfide bond,Immunity,Immunoglobulin domain,Membrane,Phosphoprotein,Proteomics identification,Receptor,Reference proteome,Signal,Transmembrane,Transmembrane helix,	chain:T-cell surface glycoprotein CD3 epsilon chain,disulfide bond,domain:Ig-like,domain:ITAM,helix,modified residue,signal peptide,strand,topological domain:Cytoplasmic,topological domain:Extracellular,transmembrane region,
CD3G	CD3g molecule(CD3G)	Homo sapiens		h_cskPathway:Activation of Csk by cAMP-dependent Protein Kinase Inhibits Signaling through the T Cell Receptor,h_ctla4Pathway:The Co-Stimulatory Signal During T-cell Activation,h_ctlPathway:CTL mediated immune response against target cells ,h_il12Pathway:IL12 and Stat4 Dependent Signaling Pathway in Th1 Development,h_il17Pathway:IL 17 Signaling Pathway,h_no2il12Pathway:NO2-dependent IL 12 Pathway…		GO:0006461~protein complex assembly,GO:0007163~establishment or maintenance of cell polarity,GO:0007166~cell surface receptor signaling pathway,GO:0015031~protein transport,GO:0031295~T cell costimulation,GO:0038096~Fc-gamma receptor signaling pathway involved in phagocytosis,GO:0042110~T cell activation,GO:0050776~regulation of immune response,GO:0050852~T cell receptor signaling pathway,GO:0070…	GO:0005886~plasma membrane,GO:0005887~integral component of plasma membrane,GO:0016020~membrane,GO:0016021~integral component of membrane,GO:0042101~T cell receptor complex,GO:0042105~alpha-beta T cell receptor complex,	GO:0004888~transmembrane signaling receptor activity,GO:0030159~receptor signaling complex scaffold activity,GO:0042608~T cell receptor binding,GO:0046982~protein heterodimerization activity,	IPR003110:Phosphorylated immunoreceptor signaling ITAM,IPR003598:Immunoglobulin subtype 2,IPR007110:Immunoglobulin-like domain,IPR013783:Immunoglobulin-like fold,IPR015484:CD3 protein, gamma/delta subunit,	hsa04640:Hematopoietic cell lineage,hsa04660:T cell receptor signaling pathway,hsa05142:Chagas disease (American trypanosomiasis),hsa05162:Measles,hsa05166:HTLV-I infection,	615607~Immunodeficiency 17, CD3 gamma deficient,		SM00077:ITAM,SM00408:IGc2,	3D-structure,Complete proteome,Direct protein sequencing,Disulfide bond,Glycoprotein,Immunoglobulin domain,Membrane,Phosphoprotein,Polymorphism,Proteomics identification,Receptor,Reference proteome,Signal,Transmembrane,Transmembrane helix,	chain:T-cell surface glycoprotein CD3 gamma chain,disulfide bond,domain:Ig-like,domain:ITAM,glycosylation site:N-linked (GlcNAc...),helix,modified residue,mutagenesis site,sequence variant,short sequence motif:Di-leucine motif,signal peptide,strand,topological domain:Cytoplasmic,topological domain:Extracellular,transmembrane region,
CD48	CD48 molecule(CD48)	Homo sapiens				GO:0002819~regulation of adaptive immune response,GO:0006952~defense response,GO:0007165~signal transduction,GO:0042110~T cell activation,GO:0045576~mast cell activation,GO:0050900~leukocyte migration,	GO:0005886~plasma membrane,GO:0005887~integral component of plasma membrane,GO:0009897~external side of plasma membrane,GO:0016020~membrane,GO:0016021~integral component of membrane,GO:0031225~anchored component of membrane,GO:0043234~protein complex,GO:0045121~membrane raft,GO:0046658~anchored component of plasma membrane,GO:0070062~extracellular exosome,	GO:0003823~antigen binding,GO:0004872~receptor activity,GO:0005515~protein binding,	IPR003599:Immunoglobulin subtype,IPR007110:Immunoglobulin-like domain,IPR013106:Immunoglobulin V-set,IPR013783:Immunoglobulin-like fold,	hsa04650:Natural killer cell mediated cytotoxicity,			SM00409:IG,	3D-structure,Alternative splicing,Cell membrane,Complete proteome,Direct protein sequencing,Disulfide bond,Glycoprotein,GPI-anchor,Immunoglobulin domain,Lipoprotein,Membrane,Polymorphism,Proteomics identification,Reference proteome,Repeat,Signal,Transmembrane,Transmembrane helix,	chain:CD48 antigen,disulfide bond,domain:Ig-like C2-type 1,domain:Ig-like C2-type 2,glycosylation site:N-linked (GlcNAc...),helix,lipid moiety-binding region:GPI-anchor amidated serine,propeptide:Removed in mature form,sequence conflict,sequence variant,signal peptide,strand,turn,
CD5	CD5 molecule(CD5)	Homo sapiens		h_dcPathway:Dendritic cells in regulating TH1 and TH2 Development,		GO:0006898~receptor-mediated endocytosis,GO:0008037~cell recognition,GO:0008283~cell proliferation,GO:0031295~T cell costimulation,GO:0097190~apoptotic signaling pathway,	GO:0005886~plasma membrane,GO:0005887~integral component of plasma membrane,GO:0009897~external side of plasma membrane,GO:0016020~membrane,GO:0016021~integral component of membrane,	GO:0004872~receptor activity,GO:0004888~transmembrane signaling receptor activity,GO:0005044~scavenger receptor activity,GO:0005515~protein binding,	IPR001190:Speract/scavenger receptor,IPR003566:T-cell surface glycoprotein CD5,IPR017448:Speract/scavenger receptor-related,	hsa04640:Hematopoietic cell lineage,			SM00202:SR,	3D-structure,Cell membrane,Complete proteome,Disulfide bond,Glycoprotein,Membrane,Phosphoprotein,Polymorphism,Proteomics identification,Reference proteome,Repeat,Signal,Transmembrane,Transmembrane helix,	chain:T-cell surface glycoprotein CD5,disulfide bond,domain:SRCR 1,domain:SRCR 2,domain:SRCR 3,glycosylation site:N-linked (GlcNAc...),helix,modified residue,sequence conflict,sequence variant,signal peptide,strand,topological domain:Cytoplasmic,topological domain:Extracellular,transmembrane region,turn,
CD6	CD6 molecule(CD6)	Homo sapiens				GO:0001771~immunological synapse formation,GO:0002250~adaptive immune response,GO:0002438~acute inflammatory response to antigenic stimulus,GO:0006898~receptor-mediated endocytosis,GO:0007157~heterophilic cell-cell adhesion via plasma membrane cell adhesion molecules,GO:0031663~lipopolysaccharide-mediated signaling pathway,GO:0032496~response to lipopolysaccharide,GO:0042102~positive regulation o…	GO:0001772~immunological synapse,GO:0005576~extracellular region,GO:0005887~integral component of plasma membrane,GO:0016020~membrane,GO:0016021~integral component of membrane,GO:0031226~intrinsic component of plasma membrane,GO:0042101~T cell receptor complex,	GO:0001530~lipopolysaccharide binding,GO:0005044~scavenger receptor activity,GO:0005515~protein binding,GO:0070891~lipoteichoic acid binding,	IPR001190:Speract/scavenger receptor,IPR017448:Speract/scavenger receptor-related,	hsa04514:Cell adhesion molecules (CAMs),			SM00202:SR,	3D-structure,Adaptive immunity,Alternative splicing,Cell adhesion,Cell membrane,Complete proteome,Disulfide bond,Glycoprotein,Immunity,Innate immunity,Membrane,Phosphoprotein,Polymorphism,Proteomics identification,Reference proteome,Repeat,Secreted,Signal,Transmembrane,Transmembrane helix,	chain:T-cell differentiation antigen CD6,disulfide bond,domain:SRCR 1,domain:SRCR 2,domain:SRCR 3,glycosylation site:N-linked (GlcNAc...),sequence conflict,sequence variant,signal peptide,splice variant,topological domain:Cytoplasmic,topological domain:Extracellular,transmembrane region,
CD7	CD7 molecule(CD7)	Homo sapiens		h_dcPathway:Dendritic cells in regulating TH1 and TH2 Development,		GO:0002250~adaptive immune response,GO:0006955~immune response,GO:0007169~transmembrane receptor protein tyrosine kinase signaling pathway,GO:0042110~T cell activation,GO:0048873~homeostasis of number of cells within a tissue,	GO:0005886~plasma membrane,GO:0016020~membrane,GO:0016021~integral component of membrane,GO:0070062~extracellular exosome,	GO:0004872~receptor activity,	IPR003599:Immunoglobulin subtype,IPR007110:Immunoglobulin-like domain,IPR013106:Immunoglobulin V-set,IPR013783:Immunoglobulin-like fold,	hsa04640:Hematopoietic cell lineage,			SM00406:IGv,SM00409:IG,	Adaptive immunity,Complete proteome,Disulfide bond,Glycoprotein,Immunity,Immunoglobulin domain,Lipoprotein,Membrane,Palmitate,Polymorphism,Proteomics identification,Receptor,Reference proteome,Repeat,Signal,Transmembrane,Transmembrane helix,	chain:T-cell antigen CD7,disulfide bond,domain:Ig-like,glycosylation site:N-linked (GlcNAc...),lipid moiety-binding region:S-palmitoyl cysteine,region of interest:4 X 9 AA tandem repeats, potential spacer function,repeat:1,repeat:2,repeat:3,repeat:4,sequence variant,signal peptide,topological domain:Cytoplasmic,topological domain:Extracellular,transmembrane region,
CD8A	CD8a molecule(CD8A)	Homo sapiens	124.GH-IGF1_thymopoiesis,58.(CD40L)_immnosurveillance,59.L-type_Ca2+_Tat_immune_cells,67.Ikaros_and_signaling_inhibitors,7.IL17_hematopoesis,78.B_Cell_Development,81.Structure_of_Caps_and_SMACs,97.Immune_injury_MS-lesions_MS_antigen,	h_il17Pathway:IL 17 Signaling Pathway,h_stemPathway:Regulation of hematopoiesis by cytokines,h_tcytotoxicPathway:T Cytotoxic Cell Surface Molecules,		GO:0002456~T cell mediated immunity,GO:0006955~immune response,GO:0007166~cell surface receptor signaling pathway,GO:0007169~transmembrane receptor protein tyrosine kinase signaling pathway,GO:0019882~antigen processing and presentation,GO:0042110~T cell activation,GO:0045065~cytotoxic T cell differentiation,GO:0050776~regulation of immune response,GO:0050850~positive regulation of calcium-mediat…	GO:0005576~extracellular region,GO:0005886~plasma membrane,GO:0005887~integral component of plasma membrane,GO:0009897~external side of plasma membrane,GO:0016021~integral component of membrane,GO:0042101~T cell receptor complex,	GO:0005515~protein binding,GO:0015026~coreceptor activity,GO:0019901~protein kinase binding,GO:0042288~MHC class I protein binding,GO:0042803~protein homodimerization activity,	IPR003599:Immunoglobulin subtype,IPR007110:Immunoglobulin-like domain,IPR013106:Immunoglobulin V-set,IPR013783:Immunoglobulin-like fold,IPR015468:CD8 alpha subunit,	hsa04514:Cell adhesion molecules (CAMs),hsa04612:Antigen processing and presentation,hsa04640:Hematopoietic cell lineage,hsa04660:T cell receptor signaling pathway,hsa05340:Primary immunodeficiency,	608957~CD8 deficiency, familial,		SM00406:IGv,SM00409:IG,	3D-structure,Adaptive immunity,Alternative splicing,Cell membrane,Complete proteome,Disease mutation,Disulfide bond,Immunity,Immunoglobulin domain,Membrane,Proteomics identification,Reference proteome,Secreted,Signal,Transmembrane,Transmembrane helix,	chain:T-cell surface glycoprotein CD8 alpha chain,disulfide bond,domain:Ig-like V-type,helix,mutagenesis site,sequence variant,signal peptide,splice variant,strand,topological domain:Cytoplasmic,topological domain:Extracellular,transmembrane region,turn,
CD8B	CD8b molecule(CD8B)	Homo sapiens				GO:0002250~adaptive immune response,GO:0006955~immune response,GO:0007169~transmembrane receptor protein tyrosine kinase signaling pathway,GO:0042110~T cell activation,GO:0050690~regulation of defense response to virus by virus,GO:0050776~regulation of immune response,	GO:0005576~extracellular region,GO:0005886~plasma membrane,GO:0005887~integral component of plasma membrane,GO:0009897~external side of plasma membrane,GO:0016021~integral component of membrane,GO:0031901~early endosome membrane,GO:0042101~T cell receptor complex,	GO:0005515~protein binding,GO:0015026~coreceptor activity,GO:0042288~MHC class I protein binding,	IPR003599:Immunoglobulin subtype,IPR007110:Immunoglobulin-like domain,IPR013106:Immunoglobulin V-set,IPR013783:Immunoglobulin-like fold,	hsa04514:Cell adhesion molecules (CAMs),hsa04612:Antigen processing and presentation,hsa04640:Hematopoietic cell lineage,hsa04660:T cell receptor signaling pathway,hsa05340:Primary immunodeficiency,			SM00406:IGv,SM00409:IG,	Adaptive immunity,Alternative splicing,Cell membrane,Complete proteome,Disulfide bond,Glycoprotein,Immunity,Immunoglobulin domain,Membrane,Phosphoprotein,Proteomics identification,Reference proteome,Secreted,Signal,Transmembrane,Transmembrane helix,	chain:T-cell surface glycoprotein CD8 beta chain,disulfide bond,domain:Ig-like V-type,glycosylation site:N-linked (GlcNAc...),modified residue,sequence conflict,signal peptide,splice variant,topological domain:Cytoplasmic,topological domain:Extracellular,transmembrane region,
CD96	CD96 molecule(CD96)	Homo sapiens			Translation, ribosomal structure and biogenesis,	GO:0002534~cytokine production involved in inflammatory response,GO:0002728~negative regulation of natural killer cell cytokine production,GO:0006955~immune response,GO:0007155~cell adhesion,GO:0007160~cell-matrix adhesion,GO:0032496~response to lipopolysaccharide,GO:0032689~negative regulation of interferon-gamma production,GO:0050776~regulation of immune response,	GO:0005737~cytoplasm,GO:0005886~plasma membrane,GO:0005887~integral component of plasma membrane,GO:0005912~adherens junction,GO:0016021~integral component of membrane,		IPR003599:Immunoglobulin subtype,IPR007110:Immunoglobulin-like domain,IPR013783:Immunoglobulin-like fold,		211750~C syndrome,		SM00409:IG,	Alternative splicing,Cell adhesion,Chromosomal rearrangement,Complete proteome,Craniosynostosis,Disease mutation,Disulfide bond,Glycoprotein,Immunoglobulin domain,Membrane,Polymorphism,Proteomics identification,Reference proteome,Repeat,Signal,Transmembrane,Transmembrane helix,	chain:T-cell surface protein tactile,compositionally biased region:Pro-rich,compositionally biased region:Pro/Ser/Thr-rich,disulfide bond,domain:Ig-like C2-type,domain:Ig-like V-type 1,domain:Ig-like V-type 2,glycosylation site:N-linked (GlcNAc...),sequence variant,signal peptide,splice variant,topological domain:Cytoplasmic,topological domain:Extracellular,transmembrane region,
FASLG	Fas ligand(FASLG)	Homo sapiens	76.Sig_trans_Ca2_Calcineurin_NF-AT,	h_achPathway:Role of nicotinic acetylcholine receptors in the regulation of apoptosis,h_aktPathway:AKT Signaling Pathway,h_asbcellPathway:Antigen Dependent B Cell Activation,h_bbcellPathway:Bystander B Cell Activation,h_ctlPathway:CTL mediated immune response against target cells ,h_fasPathway:FAS signaling pathway ( CD95 ),h_hivnefPathway:HIV-I Nef: negative effector of Fas and TNF,h_hsp27Pathwa…		GO:0000122~negative regulation of transcription from RNA polymerase II promoter,GO:0006351~transcription, DNA-templated,GO:0006915~apoptotic process,GO:0006919~activation of cysteine-type endopeptidase activity involved in apoptotic process,GO:0006925~inflammatory cell apoptotic process,GO:0006955~immune response,GO:0007165~signal transduction,GO:0007267~cell-cell signaling,GO:0008284~positive re…	GO:0005576~extracellular region,GO:0005615~extracellular space,GO:0005634~nucleus,GO:0005886~plasma membrane,GO:0005887~integral component of plasma membrane,GO:0005901~caveola,GO:0009897~external side of plasma membrane,GO:0016021~integral component of membrane,GO:0016023~cytoplasmic, membrane-bounded vesicle,GO:0043202~lysosomal lumen,GO:0048471~perinuclear region of cytoplasm,GO:0060205~cytopl…	GO:0005102~receptor binding,GO:0005123~death receptor binding,GO:0005125~cytokine activity,GO:0005164~tumor necrosis factor receptor binding,GO:0005515~protein binding,	IPR006052:Tumour necrosis factor,IPR006053:Tumour necrosis factor alpha/beta/c,IPR008983:Tumour necrosis factor-like domain,IPR021184:Tumour necrosis factor, conserved site,	hsa04010:MAPK signaling pathway,hsa04014:Ras signaling pathway,hsa04060:Cytokine-cytokine receptor interaction,hsa04068:FoxO signaling pathway,hsa04151:PI3K-Akt signaling pathway,hsa04210:Apoptosis,hsa04650:Natural killer cell mediated cytotoxicity,hsa04722:Neurotrophin signaling pathway,hsa04932:Non-alcoholic fatty liver disease (NAFLD),hsa04940:Type I diabetes mellitus,hsa05142:Chagas disease (…	211980~Lung cancer, susceptibility to,601859~Autoimmune lymphoproliferative syndrome, type IB,		SM00207:TNF,	3D-structure,Alternative splicing,Apoptosis,Cell membrane,Complete proteome,Cytokine,Cytoplasmic vesicle,Disulfide bond,Glycoprotein,Lysosome,Membrane,Nucleus,Polymorphism,Reference proteome,Repressor,Secreted,Signal-anchor,Transcription,Transcription regulation,Transmembrane,Transmembrane helix,Ubl conjugation,	chain:Tumor necrosis factor ligand superfamily member 6, membrane form,chain:Tumor necrosis factor ligand superfamily member 6, soluble form,compositionally biased region:Poly-Pro,compositionally biased region:Pro-rich,disulfide bond,glycosylation site:N-linked (GlcNAc...),helix,mutagenesis site,sequence variant,site:Cleavage,splice variant,strand,topological domain:Cytoplasmic,topological domain…
GPR171	G protein-coupled receptor 171(GPR171)	Homo sapiens				GO:0007186~G-protein coupled receptor signaling pathway,GO:0035589~G-protein coupled purinergic nucleotide receptor signaling pathway,GO:0045638~negative regulation of myeloid cell differentiation,	GO:0005887~integral component of plasma membrane,GO:0016021~integral component of membrane,	GO:0004930~G-protein coupled receptor activity,GO:0045028~G-protein coupled purinergic nucleotide receptor activity,	IPR000276:G protein-coupled receptor, rhodopsin-like,IPR017452:GPCR, rhodopsin-like, 7TM,					Cell membrane,Complete proteome,G-protein coupled receptor,Glycoprotein,Membrane,Polymorphism,Receptor,Reference proteome,Transducer,Transmembrane,Transmembrane helix,	chain:Probable G-protein coupled receptor 171,glycosylation site:N-linked (GlcNAc...),sequence variant,topological domain:Cytoplasmic,topological domain:Extracellular,transmembrane region,
GIMAP5	GTPase, IMAP family member 5(GIMAP5)	Homo sapiens					GO:0005741~mitochondrial outer membrane,GO:0005764~lysosome,GO:0016021~integral component of membrane,	GO:0005515~protein binding,GO:0005525~GTP binding,	IPR006703:AIG1,IPR027417:P-loop containing nucleoside triphosphate hydrolase,					Alternative splicing,Complete proteome,GTP-binding,Lysosome,Membrane,Mitochondrion,Mitochondrion outer membrane,Nucleotide-binding,Reference proteome,Transmembrane,Transmembrane helix,	chain:GTPase IMAP family member 5,nucleotide phosphate-binding region:GTP,sequence conflict,splice variant,topological domain:Cytoplasmic,topological domain:Extracellular,transmembrane region,
IKZF1	IKAROS family zinc finger 1(IKZF1)	Homo sapiens			General function prediction only,	GO:0000122~negative regulation of transcription from RNA polymerase II promoter,GO:0006351~transcription, DNA-templated,GO:0007049~cell cycle,GO:0007498~mesoderm development,GO:0016569~covalent chromatin modification,GO:0030098~lymphocyte differentiation,GO:0030218~erythrocyte differentiation,GO:0045892~negative regulation of transcription, DNA-templated,GO:0045944~positive regulation of transcri…	GO:0005634~nucleus,GO:0005737~cytoplasm,GO:0031618~nuclear pericentric heterochromatin,GO:0043234~protein complex,	GO:0003676~nucleic acid binding,GO:0003677~DNA binding,GO:0003700~transcription factor activity, sequence-specific DNA binding,GO:0005515~protein binding,GO:0044212~transcription regulatory region DNA binding,GO:0046872~metal ion binding,	IPR007087:Zinc finger, C2H2,IPR013087:Zinc finger C2H2-type/integrase DNA-binding domain,IPR015880:Zinc finger, C2H2-like,		Leukemia, acute lymphoblastic~Leukemia, acute lymphoblastic,		SM00355:ZnF_C2H2,	Activator,Alternative splicing,Cell cycle,Chromatin regulator,Chromosomal rearrangement,Complete proteome,Cytoplasm,Developmental protein,Disease mutation,DNA-binding,Isopeptide bond,Metal-binding,Nucleus,Phosphoprotein,Proteomics identification,Reference proteome,Repeat,Repressor,Transcription,Transcription regulation,Ubl conjugation,Zinc,Zinc-finger,	chain:DNA-binding protein Ikaros,compositionally biased region:Poly-Leu,cross-link:Glycyl lysine isopeptide (Lys-Gly) (interchain with G-Cter in SUMO),modified residue,region of interest:Required for binding PP1CC,region of interest:Required for both high-affinity DNA binding and pericentromeric heterochromatin localization,sequence conflict,site:Required for both pericentromeric heterochromatin …
ITK	IL2 inducible T-cell kinase(ITK)	Homo sapiens		h_ctla4Pathway:The Co-Stimulatory Signal During T-cell Activation,		GO:0001816~cytokine production,GO:0001865~NK T cell differentiation,GO:0002250~adaptive immune response,GO:0006968~cellular defense response,GO:0007165~signal transduction,GO:0007169~transmembrane receptor protein tyrosine kinase signaling pathway,GO:0007202~activation of phospholipase C activity,GO:0032609~interferon-gamma production,GO:0032633~interleukin-4 production,GO:0035556~intracellular s…	GO:0005622~intracellular,GO:0005829~cytosol,GO:0005911~cell-cell junction,GO:0031234~extrinsic component of cytoplasmic side of plasma membrane,	GO:0004715~non-membrane spanning protein tyrosine kinase activity,GO:0005102~receptor binding,GO:0005515~protein binding,GO:0005524~ATP binding,GO:0046872~metal ion binding,	IPR000719:Protein kinase, catalytic domain,IPR000980:SH2 domain,IPR001245:Serine-threonine/tyrosine-protein kinase catalytic domain,IPR001452:Src homology-3 domain,IPR001562:Zinc finger, Btk motif,IPR001849:Pleckstrin homology domain,IPR008266:Tyrosine-protein kinase, active site,IPR011009:Protein kinase-like domain,IPR011993:Pleckstrin homology-like domain,IPR017441:Protein kinase, ATP binding s…	hsa04062:Chemokine signaling pathway,hsa04660:T cell receptor signaling pathway,hsa04670:Leukocyte transendothelial migration,	613011~Lymphoproliferative syndrome 1,		SM00107:BTK,SM00219:TyrKc,SM00233:PH,SM00252:SH2,SM00326:SH3,	3D-structure,Adaptive immunity,ATP-binding,Complete proteome,Cytoplasm,Direct protein sequencing,Disease mutation,Immunity,Kinase,Metal-binding,Nucleotide-binding,Phosphoprotein,Polymorphism,Proteomics identification,Reference proteome,SH2 domain,SH3 domain,Transferase,Tyrosine-protein kinase,Ubl conjugation,Zinc,Zinc-finger,	active site:Proton acceptor,binding site:ATP,chain:Tyrosine-protein kinase ITK/TSK,domain:PH,domain:Protein kinase,domain:SH2,domain:SH3,helix,metal ion-binding site:Zinc,modified residue,nucleotide phosphate-binding region:ATP,sequence conflict,sequence variant,strand,turn,zinc finger region:Btk-type,
LCK	LCK proto-oncogene, Src family tyrosine kinase(LCK)	Homo sapiens	3.T_cell_receptor,54.T-cell_anergy,63.LAT_couples_T-cell_receptor,67.Ikaros_and_signaling_inhibitors,81.Structure_of_Caps_and_SMACs,	h_cskPathway:Activation of Csk by cAMP-dependent Protein Kinase Inhibits Signaling through the T Cell Receptor,h_ctla4Pathway:The Co-Stimulatory Signal During T-cell Activation,h_il2Pathway:IL 2 signaling pathway,h_il7Pathway:IL-7 Signal Transduction,h_tcraPathway:Lck and Fyn tyrosine kinases in initiation of TCR Activation,h_tcrPathway:T Cell Receptor Signaling Pathway,		GO:0006468~protein phosphorylation,GO:0006470~protein dephosphorylation,GO:0006882~cellular zinc ion homeostasis,GO:0006919~activation of cysteine-type endopeptidase activity involved in apoptotic process,GO:0007169~transmembrane receptor protein tyrosine kinase signaling pathway,GO:0014066~regulation of phosphatidylinositol 3-kinase signaling,GO:0016032~viral process,GO:0030097~hemopoiesis,GO:00…	GO:0000242~pericentriolar material,GO:0001772~immunological synapse,GO:0005829~cytosol,GO:0005886~plasma membrane,GO:0031234~extrinsic component of cytoplasmic side of plasma membrane,GO:0045121~membrane raft,GO:0070062~extracellular exosome,	GO:0001948~glycoprotein binding,GO:0004713~protein tyrosine kinase activity,GO:0004715~non-membrane spanning protein tyrosine kinase activity,GO:0004722~protein serine/threonine phosphatase activity,GO:0005515~protein binding,GO:0005524~ATP binding,GO:0008022~protein C-terminus binding,GO:0016301~kinase activity,GO:0019901~protein kinase binding,GO:0019903~protein phosphatase binding,GO:0042169~S…	IPR000719:Protein kinase, catalytic domain,IPR000980:SH2 domain,IPR001245:Serine-threonine/tyrosine-protein kinase catalytic domain,IPR001452:Src homology-3 domain,IPR008266:Tyrosine-protein kinase, active site,IPR011009:Protein kinase-like domain,IPR017441:Protein kinase, ATP binding site,IPR020635:Tyrosine-protein kinase, catalytic domain,	hsa04064:NF-kappa B signaling pathway,hsa04380:Osteoclast differentiation,hsa04650:Natural killer cell mediated cytotoxicity,hsa04660:T cell receptor signaling pathway,hsa05166:HTLV-I infection,hsa05340:Primary immunodeficiency,	615758~Immunodeficiency 22,		SM00219:TyrKc,SM00252:SH2,SM00326:SH3,	3D-structure,Alternative splicing,ATP-binding,Cell membrane,Chromosomal rearrangement,Complete proteome,Cytoplasm,Disease mutation,Host-virus interaction,Kinase,Lipoprotein,Membrane,Myristate,Nucleotide-binding,Palmitate,Phosphoprotein,Polymorphism,Proteomics identification,Proto-oncogene,Reference proteome,SH2 domain,SH3 domain,Transferase,Tyrosine-protein kinase,	active site:Proton acceptor,binding site:ATP,chain:Proto-oncogene tyrosine-protein kinase LCK,domain:Protein kinase,domain:SH2,domain:SH3,helix,lipid moiety-binding region:N-myristoyl glycine,lipid moiety-binding region:S-palmitoyl cysteine,modified residue,mutagenesis site,nucleotide phosphate-binding region:ATP,region of interest:Interaction with PTPRH,region of interest:Interactions with CD4 a…
RASAL3	RAS protein activator like 3(RASAL3)	Homo sapiens			Cell division and chromosome partitioning,	GO:0000165~MAPK cascade,GO:0007165~signal transduction,GO:0043087~regulation of GTPase activity,GO:0043547~positive regulation of GTPase activity,GO:0046580~negative regulation of Ras protein signal transduction,GO:0051142~positive regulation of NK T cell proliferation,	GO:0005737~cytoplasm,GO:0005829~cytosol,GO:0005938~cell cortex,GO:0016020~membrane,GO:0031235~intrinsic component of the cytoplasmic side of the plasma membrane,GO:0070062~extracellular exosome,GO:0098562~cytoplasmic side of membrane,	GO:0005096~GTPase activator activity,	IPR000008:C2 calcium-dependent membrane targeting,IPR001936:Ras GTPase-activating protein,IPR008936:Rho GTPase activation protein,IPR011993:Pleckstrin homology-like domain,IPR023152:Ras GTPase-activating protein, conserved site,	hsa04014:Ras signaling pathway,			SM00323:RasGAP,	Alternative splicing,Coiled coil,Complete proteome,Cytoplasm,GTPase activation,Phosphoprotein,Polymorphism,Proteomics identification,Reference proteome,	chain:RAS protein activator like-3,compositionally biased region:Arg-rich,compositionally biased region:Poly-Gly,compositionally biased region:Pro-rich,domain:C2,domain:PH,domain:Ras-GAP,modified residue,sequence variant,splice variant,
ARHGAP9	Rho GTPase activating protein 9(ARHGAP9)	Homo sapiens				GO:0007165~signal transduction,GO:0043547~positive regulation of GTPase activity,GO:0051056~regulation of small GTPase mediated signal transduction,	GO:0005829~cytosol,	GO:0005096~GTPase activator activity,GO:0005515~protein binding,GO:0005547~phosphatidylinositol-3,4,5-trisphosphate binding,	IPR000198:Rho GTPase-activating protein domain,IPR001202:WW domain,IPR001452:Src homology-3 domain,IPR001849:Pleckstrin homology domain,IPR008936:Rho GTPase activation protein,IPR011993:Pleckstrin homology-like domain,IPR015767:Rho GTPase activating,				SM00233:PH,SM00324:RhoGAP,	3D-structure,Alternative splicing,Complete proteome,GTPase activation,Lipid-binding,Phosphoprotein,Polymorphism,Proteomics identification,Reference proteome,SH3 domain,	chain:Rho GTPase-activating protein 9,domain:PH,domain:Rho-GAP,domain:SH3,domain:WW,helix,modified residue,sequence conflict,sequence variant,splice variant,strand,
SASH3	SAM and SH3 domain containing 3(SASH3)	Homo sapiens				GO:0002639~positive regulation of immunoglobulin production,GO:0002726~positive regulation of T cell cytokine production,GO:0030890~positive regulation of B cell proliferation,GO:0032729~positive regulation of interferon-gamma production,GO:0032733~positive regulation of interleukin-10 production,GO:0032743~positive regulation of interleukin-2 production,GO:0032753~positive regulation of interleu…	GO:0005634~nucleus,GO:0005737~cytoplasm,		IPR001452:Src homology-3 domain,IPR001660:Sterile alpha motif domain,IPR011511:Variant SH3,IPR013761:Sterile alpha motif/pointed domain,IPR021090:SAM/SH3 domain-containing,				SM00326:SH3,SM00454:SAM,	Complete proteome,Phosphoprotein,Reference proteome,SH3 domain,	chain:SAM and SH3 domain-containing protein 3,domain:SAM,domain:SH3,modified residue,sequence conflict,
SH2D1A	SH2 domain containing 1A(SH2D1A)	Homo sapiens	61.Myc_network,84.Ubiquitination_Pathways_Cell_Cycle,			GO:0002250~adaptive immune response,GO:0006959~humoral immune response,GO:0006968~cellular defense response,GO:0007267~cell-cell signaling,GO:0009967~positive regulation of signal transduction,GO:0045087~innate immune response,GO:0045954~positive regulation of natural killer cell mediated cytotoxicity,GO:0050776~regulation of immune response,	GO:0005737~cytoplasm,GO:0005829~cytosol,	GO:0005070~SH3/SH2 adaptor activity,GO:0005515~protein binding,	IPR000980:SH2 domain,IPR017289:SH2 protein 1A,	hsa04650:Natural killer cell mediated cytotoxicity,hsa05162:Measles,	308240~Lymphoproliferative syndrome, X-linked, 1,	PIRSF037828:SH2 domain protein 1A ,	SM00252:SH2,	3D-structure,Acetylation,Adaptive immunity,Alternative splicing,Complete proteome,Cytoplasm,Disease mutation,Immunity,Innate immunity,Polymorphism,Reference proteome,SH2 domain,	chain:SH2 domain-containing protein 1A,domain:SH2,helix,modified residue,mutagenesis site,sequence variant,splice variant,strand,
SLAMF6	SLAM family member 6(SLAMF6)	Homo sapiens				GO:0001779~natural killer cell differentiation,GO:0001787~natural killer cell proliferation,GO:0032729~positive regulation of interferon-gamma production,GO:0032740~positive regulation of interleukin-17 production,GO:0045087~innate immune response,GO:0045954~positive regulation of natural killer cell mediated cytotoxicity,GO:0050776~regulation of immune response,GO:0072540~T-helper 17 cell lineag…	GO:0005886~plasma membrane,GO:0016021~integral component of membrane,GO:0070062~extracellular exosome,	GO:0005515~protein binding,	IPR003599:Immunoglobulin subtype,IPR007110:Immunoglobulin-like domain,IPR013106:Immunoglobulin V-set,IPR013783:Immunoglobulin-like fold,				SM00409:IG,	3D-structure,Adaptive immunity,Alternative splicing,Cell membrane,Complete proteome,Direct protein sequencing,Disulfide bond,Glycoprotein,Immunity,Immunoglobulin domain,Innate immunity,Membrane,Phosphoprotein,Receptor,Reference proteome,Signal,Transmembrane,Transmembrane helix,	chain:SLAM family member 6,disulfide bond,domain:Ig-like,glycosylation site:N-linked (GlcNAc...),helix,modified residue,mutagenesis site,signal peptide,splice variant,strand,topological domain:Cytoplasmic,topological domain:Extracellular,transmembrane region,turn,
SLA2	Src like adaptor 2(SLA2)	Homo sapiens				GO:0000122~negative regulation of transcription from RNA polymerase II promoter,GO:0009967~positive regulation of signal transduction,GO:0019724~B cell mediated immunity,GO:0030522~intracellular receptor signaling pathway,GO:0042110~T cell activation,GO:0050776~regulation of immune response,GO:0050849~negative regulation of calcium-mediated signaling,GO:0050851~antigen receptor-mediated signaling…	GO:0005737~cytoplasm,GO:0005770~late endosome,GO:0005886~plasma membrane,GO:0010008~endosome membrane,GO:0016023~cytoplasmic, membrane-bounded vesicle,	GO:0005070~SH3/SH2 adaptor activity,GO:0005515~protein binding,GO:0047485~protein N-terminus binding,	IPR000980:SH2 domain,IPR001452:Src homology-3 domain,				SM00252:SH2,SM00326:SH3,	3D-structure,Alternative initiation,Alternative splicing,Cell membrane,Complete proteome,Cytoplasm,Cytoplasmic vesicle,Lipoprotein,Membrane,Myristate,Phosphoprotein,Polymorphism,Reference proteome,SH2 domain,SH3 domain,	chain:Src-like-adapter 2,domain:SH2,domain:SH3,lipid moiety-binding region:N-myristoyl glycine,mutagenesis site,region of interest:SLA C-terminal,sequence variant,splice variant,
TRAT1	T cell receptor associated transmembrane adaptor 1(TRAT1)	Homo sapiens				GO:0001920~negative regulation of receptor recycling,GO:0002250~adaptive immune response,GO:0006968~cellular defense response,GO:0007165~signal transduction,GO:0007169~transmembrane receptor protein tyrosine kinase signaling pathway,GO:0014066~regulation of phosphatidylinositol 3-kinase signaling,GO:0046854~phosphatidylinositol phosphorylation,GO:0048015~phosphatidylinositol-mediated signaling,GO…	GO:0005622~intracellular,GO:0005886~plasma membrane,GO:0005887~integral component of plasma membrane,GO:0042101~T cell receptor complex,	GO:0005068~transmembrane receptor protein tyrosine kinase adaptor activity,GO:0046934~phosphatidylinositol-4,5-bisphosphate 3-kinase activity,	IPR020399:T-cell receptor-associated transmembrane adapter 1,					Adaptive immunity,Cell membrane,Complete proteome,Direct protein sequencing,Disulfide bond,Immunity,Membrane,Phosphoprotein,Polymorphism,Proteomics identification,Reference proteome,Signal-anchor,Transmembrane,Transmembrane helix,	chain:T-cell receptor-associated transmembrane adapter 1,disulfide bond,modified residue,mutagenesis site,region of interest:Interaction with PIK3R1,sequence variant,topological domain:Cytoplasmic,topological domain:Extracellular,transmembrane region,
TBX21	T-box 21(TBX21)	Homo sapiens				GO:0006351~transcription, DNA-templated,GO:0006355~regulation of transcription, DNA-templated,GO:0007275~multicellular organism development,GO:0009615~response to virus,GO:0030217~T cell differentiation,GO:0045893~positive regulation of transcription, DNA-templated,GO:0048304~positive regulation of isotype switching to IgG isotypes,GO:0071310~cellular response to organic substance,GO:0072676~lymp…	GO:0005634~nucleus,GO:0043025~neuronal cell body,	GO:0003700~transcription factor activity, sequence-specific DNA binding,GO:0044212~transcription regulatory region DNA binding,	IPR001699:Transcription factor, T-box,IPR008967:p53-like transcription factor, DNA-binding,IPR018186:Transcription factor, T-box, conserved site,	hsa05321:Inflammatory bowel disease (IBD),	208550~Asthma and nasal polyps,208550~Asthma, aspirin-induced, susceptibility to,		SM00425:TBOX,	Activator,Asthma,Complete proteome,DNA-binding,Nucleus,Polymorphism,Reference proteome,Transcription,Transcription regulation,	chain:T-box transcription factor TBX21,DNA-binding region:T-box,sequence variant,
TIGIT	T-cell immunoreceptor with Ig and ITIM domains(TIGIT)	Homo sapiens				GO:0007156~homophilic cell adhesion via plasma membrane adhesion molecules,GO:0007157~heterophilic cell-cell adhesion via plasma membrane cell adhesion molecules,GO:0008037~cell recognition,GO:0032695~negative regulation of interleukin-12 production,GO:0032733~positive regulation of interleukin-10 production,GO:0050868~negative regulation of T cell activation,	GO:0005887~integral component of plasma membrane,GO:0005913~cell-cell adherens junction,GO:0009986~cell surface,GO:0016021~integral component of membrane,	GO:0004872~receptor activity,GO:0005102~receptor binding,GO:0005515~protein binding,GO:0042803~protein homodimerization activity,GO:0050839~cell adhesion molecule binding,	IPR003599:Immunoglobulin subtype,IPR007110:Immunoglobulin-like domain,IPR013106:Immunoglobulin V-set,IPR013783:Immunoglobulin-like fold,	hsa04514:Cell adhesion molecules (CAMs),			SM00409:IG,	3D-structure,Alternative splicing,Cell membrane,Complete proteome,Disulfide bond,Glycoprotein,Immunoglobulin domain,Membrane,Polymorphism,Proteomics identification,Reference proteome,Signal,Transmembrane,Transmembrane helix,	chain:T cell immunoreceptor with Ig and ITIM domains,disulfide bond,domain:Ig-like V-type,glycosylation site:N-linked (GlcNAc...),sequence conflict,sequence variant,short sequence motif:ITIM motif,signal peptide,splice variant,topological domain:Cytoplasmic,topological domain:Extracellular,transmembrane region,
TBC1D10C	TBC1 domain family member 10C(TBC1D10C)	Homo sapiens				GO:0006886~intracellular protein transport,GO:0031338~regulation of vesicle fusion,GO:0042147~retrograde transport, endosome to Golgi,GO:0050869~negative regulation of B cell activation,GO:0051534~negative regulation of NFAT protein import into nucleus,GO:0070373~negative regulation of ERK1 and ERK2 cascade,GO:0090630~activation of GTPase activity,GO:1902017~regulation of cilium assembly,	GO:0005829~cytosol,GO:0005886~plasma membrane,GO:0012505~endomembrane system,GO:0016020~membrane,GO:0031527~filopodium membrane,	GO:0005096~GTPase activator activity,GO:0005515~protein binding,GO:0017137~Rab GTPase binding,	IPR000195:Rab-GTPase-TBC domain,				SM00164:TBC,	Alternative splicing,Complete proteome,GTPase activation,Proteomics identification,Reference proteome,	chain:Carabin,domain:Rab-GAP TBC,mutagenesis site,region of interest:Interaction with calcineurin,
TRAF3IP3	TRAF3 interacting protein 3(TRAF3IP3)	Homo sapiens					GO:0016021~integral component of membrane,	GO:0005515~protein binding,						Alternative splicing,Coiled coil,Complete proteome,Isopeptide bond,Membrane,Polymorphism,Proteomics identification,Reference proteome,Transmembrane,Transmembrane helix,	chain:TRAF3-interacting JNK-activating modulator,cross-link:Glycyl lysine isopeptide (Lys-Gly) (interchain with G-Cter in ubiquitin),sequence variant,splice variant,topological domain:Cytoplasmic,topological domain:Extracellular,transmembrane region,
WAS	Wiskott-Aldrich syndrome(WAS)	Homo sapiens	82.TCR_and_Cap_or_SMAC,			GO:0002625~regulation of T cell antigen processing and presentation,GO:0006461~protein complex assembly,GO:0006952~defense response,GO:0006955~immune response,GO:0007015~actin filament organization,GO:0007596~blood coagulation,GO:0008154~actin polymerization or depolymerization,GO:0008544~epidermis development,GO:0016197~endosomal transport,GO:0030041~actin filament polymerization,GO:0030048~acti…	GO:0005829~cytosol,GO:0005911~cell-cell junction,GO:0012506~vesicle membrane,GO:0015629~actin cytoskeleton,GO:0070062~extracellular exosome,	GO:0003779~actin binding,GO:0005515~protein binding,GO:0017124~SH3 domain binding,GO:0019901~protein kinase binding,GO:0030695~GTPase regulator activity,GO:0042802~identical protein binding,GO:0043274~phospholipase binding,	IPR000095:PAK-box/P21-Rho-binding,IPR000697:EVH1,IPR003124:WH2 domain,IPR011026:Wiscott-Aldrich syndrome, C-terminal,IPR011993:Pleckstrin homology-like domain,	hsa04062:Chemokine signaling pathway,hsa04144:Endocytosis,hsa04520:Adherens junction,hsa04666:Fc gamma R-mediated phagocytosis,hsa04810:Regulation of actin cytoskeleton,hsa05100:Bacterial invasion of epithelial cells,hsa05130:Pathogenic Escherichia coli infection,hsa05131:Shigellosis,hsa05132:Salmonella infection,hsa05231:Choline metabolism in cancer,	300299~Neutropenia, severe congenital, X-linked,301000~Wiskott-Aldrich syndrome,313900~Thrombocytopenia, X-linked,313900~Thrombocytopenia, X-linked, intermittent,		SM00246:WH2,SM00285:PBD,SM00461:WH1,	3D-structure,Complete proteome,Cytoplasm,Cytoskeleton,Direct protein sequencing,Disease mutation,Phosphoprotein,Proteomics identification,Reference proteome,Repeat,	chain:Wiskott-Aldrich syndrome protein,compositionally biased region:Asp/Glu-rich (acidic),compositionally biased region:Poly-Pro,domain:CRIB,domain:WH1,domain:WH2,helix,modified residue,repeat:GRSGPLPPXP motif 1,repeat:GRSGPLPPXP motif 2,sequence conflict,sequence variant,strand,turn,
CORO1A	coronin 1A(CORO1A)	Homo sapiens				GO:0001771~immunological synapse formation,GO:0001845~phagolysosome assembly,GO:0006816~calcium ion transport,GO:0006909~phagocytosis,GO:0006928~movement of cell or subcellular component,GO:0007015~actin filament organization,GO:0008360~regulation of cell shape,GO:0030036~actin cytoskeleton organization,GO:0030335~positive regulation of cell migration,GO:0030595~leukocyte chemotaxis,GO:0030833~re…	GO:0001772~immunological synapse,GO:0001891~phagocytic cup,GO:0005634~nucleus,GO:0005737~cytoplasm,GO:0005769~early endosome,GO:0005829~cytosol,GO:0005884~actin filament,GO:0005886~plasma membrane,GO:0005911~cell-cell junction,GO:0015629~actin cytoskeleton,GO:0016020~membrane,GO:0030027~lamellipodium,GO:0030424~axon,GO:0030670~phagocytic vesicle membrane,GO:0030864~cortical actin cytoskeleton,GO:…	GO:0003779~actin binding,GO:0003785~actin monomer binding,GO:0005515~protein binding,GO:0008022~protein C-terminus binding,GO:0008092~cytoskeletal protein binding,GO:0032036~myosin heavy chain binding,GO:0042803~protein homodimerization activity,GO:0043548~phosphatidylinositol 3-kinase binding,GO:0044822~poly(A) RNA binding,GO:0051015~actin filament binding,	IPR001680:WD40 repeat,IPR015048:Domain of unknown function DUF1899,IPR015049:Domain of unknown function DUF1900,IPR015505:Coronin,IPR015943:WD40/YVTN repeat-like-containing domain,IPR017986:WD40-repeat-containing domain,IPR019775:WD40 repeat, conserved site,	hsa04145:Phagosome,hsa05152:Tuberculosis,	615401~Immunodeficiency 8,		SM00320:WD40,SM01166:SM01166,	Acetylation,Actin-binding,Coiled coil,Complete proteome,Cytoplasm,Cytoplasmic vesicle,Cytoskeleton,Direct protein sequencing,Disease mutation,Membrane,Phosphoprotein,Polymorphism,Proteomics identification,Reference proteome,Repeat,Ubl conjugation,WD repeat,	chain:Coronin-1A,modified residue,repeat:WD 1,repeat:WD 2,repeat:WD 3,repeat:WD 4,repeat:WD 5,sequence conflict,sequence variant,
CST7	cystatin F(CST7)	Homo sapiens				GO:0006955~immune response,GO:2000117~negative regulation of cysteine-type endopeptidase activity,	GO:0005615~extracellular space,GO:0005737~cytoplasm,	GO:0002020~protease binding,GO:0004866~endopeptidase inhibitor activity,GO:0004869~cysteine-type endopeptidase inhibitor activity,GO:0005515~protein binding,	IPR000010:Proteinase inhibitor I25, cystatin,IPR027214:Cystatin,				SM00043:CY,	3D-structure,Complete proteome,Cytoplasm,Disulfide bond,Glycoprotein,Protease inhibitor,Reference proteome,Secreted,Signal,Thiol protease inhibitor,	chain:Cystatin-F,disulfide bond,glycosylation site:N-linked (GlcNAc...),helix,short sequence motif:Secondary area of contact,signal peptide,site:Reactive site,strand,turn,
CTLA4	cytotoxic T-lymphocyte associated protein 4(CTLA4)	Homo sapiens	3.T_cell_receptor,5.B7_CD40_B-cell_activa,	h_ctla4Pathway:The Co-Stimulatory Signal During T-cell Activation,		GO:0002250~adaptive immune response,GO:0006955~immune response,GO:0006974~cellular response to DNA damage stimulus,GO:0030889~negative regulation of B cell proliferation,GO:0031295~T cell costimulation,GO:0042130~negative regulation of T cell proliferation,GO:0043065~positive regulation of apoptotic process,GO:0045590~negative regulation of regulatory T cell differentiation,GO:0050777~negative re…	GO:0005794~Golgi apparatus,GO:0005886~plasma membrane,GO:0005887~integral component of plasma membrane,GO:0009897~external side of plasma membrane,GO:0016020~membrane,GO:0016021~integral component of membrane,GO:0045334~clathrin-coated endocytic vesicle,GO:0048471~perinuclear region of cytoplasm,GO:0098636~protein complex involved in cell adhesion,	GO:0005515~protein binding,	IPR003599:Immunoglobulin subtype,IPR007110:Immunoglobulin-like domain,IPR008096:Cytotoxic T-lymphocyte antigen 4,IPR013106:Immunoglobulin V-set,IPR013783:Immunoglobulin-like fold,	hsa04514:Cell adhesion molecules (CAMs),hsa04660:T cell receptor signaling pathway,hsa05320:Autoimmune thyroid disease,hsa05323:Rheumatoid arthritis,	140300~Hashimoto thyroiditis,152700~Systemic lupus erythematosus, susceptibility to,601388~Diabetes mellitus, insulin-dependent, 12,609755~Celiac disease, susceptibility to, 3,616100~Autoimmune lymphoproliferative syndrome, type V,		SM00406:IGv,SM00409:IG,	3D-structure,Adaptive immunity,Alternative splicing,Cell membrane,Complete proteome,Diabetes mellitus,Disease mutation,Disulfide bond,Glycoprotein,Immunity,Immunoglobulin domain,Membrane,Pharmaceutical,Phosphoprotein,Polymorphism,Reference proteome,Signal,Systemic lupus erythematosus,Transmembrane,Transmembrane helix,	chain:Cytotoxic T-lymphocyte protein 4,disulfide bond,domain:Ig-like V-type,glycosylation site:N-linked (GlcNAc...),sequence conflict,sequence variant,signal peptide,strand,topological domain:Cytoplasmic,topological domain:Extracellular,transmembrane region,turn,
GZMA	granzyme A(GZMA)	Homo sapiens		h_setPathway:Granzyme A mediated Apoptosis Pathway,		GO:0006915~apoptotic process,GO:0006955~immune response,GO:0019835~cytolysis,GO:0032078~negative regulation of endodeoxyribonuclease activity,GO:0043065~positive regulation of apoptotic process,GO:0043392~negative regulation of DNA binding,GO:0051354~negative regulation of oxidoreductase activity,GO:0051603~proteolysis involved in cellular protein catabolic process,	GO:0001772~immunological synapse,GO:0005576~extracellular region,GO:0005634~nucleus,	GO:0004252~serine-type endopeptidase activity,GO:0005515~protein binding,GO:0042803~protein homodimerization activity,	IPR001254:Peptidase S1,IPR001314:Peptidase S1A, chymotrypsin-type,IPR009003:Trypsin-like cysteine/serine peptidase domain,IPR018114:Peptidase S1, trypsin family, active site,	hsa04080:Neuroactive ligand-receptor interaction,			SM00020:Tryp_SPc,	3D-structure,Alternative promoter usage,Apoptosis,Complete proteome,Cytolysis,Direct protein sequencing,Disulfide bond,Glycoprotein,Hydrolase,Polymorphism,Protease,Reference proteome,Secreted,Serine protease,Signal,Zymogen,	active site:Charge relay system,chain:granzyme A,disulfide bond,domain:Peptidase S1,glycosylation site:N-linked (GlcNAc...),helix,propeptide:Activation peptide (in isoform alpha),sequence conflict,sequence variant,signal peptide,splice variant,strand,turn,
GZMB	granzyme B(GZMB)	Homo sapiens		h_caspasePathway:Caspase Cascade in Apoptosis,h_ctlPathway:CTL mediated immune response against target cells ,h_d4gdiPathway:D4-GDI Signaling Pathway,h_DNAfragmentPathway:Apoptotic DNA fragmentation and tissue homeostasis,h_setPathway:Granzyme A mediated Apoptosis Pathway,		GO:0006915~apoptotic process,GO:0016485~protein processing,GO:0019835~cytolysis,GO:0042267~natural killer cell mediated cytotoxicity,GO:1900740~positive regulation of protein insertion into mitochondrial membrane involved in apoptotic signaling pathway,	GO:0001772~immunological synapse,GO:0005634~nucleus,GO:0005737~cytoplasm,GO:0005739~mitochondrion,GO:0005829~cytosol,GO:0016020~membrane,GO:0043231~intracellular membrane-bounded organelle,	GO:0004252~serine-type endopeptidase activity,GO:0005515~protein binding,GO:0008236~serine-type peptidase activity,	IPR001254:Peptidase S1,IPR001314:Peptidase S1A, chymotrypsin-type,IPR009003:Trypsin-like cysteine/serine peptidase domain,IPR018114:Peptidase S1, trypsin family, active site,	hsa04650:Natural killer cell mediated cytotoxicity,hsa04940:Type I diabetes mellitus,hsa05202:Transcriptional misregulation in cancer,hsa05320:Autoimmune thyroid disease,hsa05330:Allograft rejection,hsa05332:Graft-versus-host disease,			SM00020:Tryp_SPc,	3D-structure,Apoptosis,Complete proteome,Cytolysis,Direct protein sequencing,Disulfide bond,Glycoprotein,Hydrolase,Polymorphism,Protease,Proteomics identification,Reference proteome,Serine protease,Signal,Zymogen,	active site:Charge relay system,chain:Granzyme B,disulfide bond,domain:Peptidase S1,glycosylation site:N-linked (GlcNAc...),helix,propeptide:Activation peptide,sequence conflict,sequence variant,signal peptide,strand,turn,
GZMH	granzyme H(GZMH)	Homo sapiens				GO:0006915~apoptotic process,GO:0006955~immune response,GO:0016485~protein processing,GO:0019835~cytolysis,	GO:0005737~cytoplasm,GO:0016020~membrane,GO:0043231~intracellular membrane-bounded organelle,	GO:0004252~serine-type endopeptidase activity,	IPR001254:Peptidase S1,IPR001314:Peptidase S1A, chymotrypsin-type,IPR009003:Trypsin-like cysteine/serine peptidase domain,IPR018114:Peptidase S1, trypsin family, active site,				SM00020:Tryp_SPc,	3D-structure,Alternative splicing,Complete proteome,Cytolysis,Disulfide bond,Glycoprotein,Hydrolase,Polymorphism,Protease,Proteomics identification,Reference proteome,Serine protease,Signal,Zymogen,	active site:Charge relay system,chain:Granzyme H,disulfide bond,domain:Peptidase S1,glycosylation site:N-linked (GlcNAc...),helix,propeptide:Activation peptide,sequence variant,signal peptide,strand,turn,
GZMK	granzyme K(GZMK)	Homo sapiens				GO:0006508~proteolysis,	GO:0005576~extracellular region,	GO:0004252~serine-type endopeptidase activity,GO:0008236~serine-type peptidase activity,	IPR001254:Peptidase S1,IPR001314:Peptidase S1A, chymotrypsin-type,IPR009003:Trypsin-like cysteine/serine peptidase domain,IPR018114:Peptidase S1, trypsin family, active site,				SM00020:Tryp_SPc,	3D-structure,Complete proteome,Direct protein sequencing,Disulfide bond,Hydrolase,Protease,Reference proteome,Secreted,Serine protease,Signal,Zymogen,	active site:Charge relay system,chain:Granzyme K,disulfide bond,domain:Peptidase S1,helix,propeptide:Activation peptide,sequence conflict,signal peptide,strand,turn,
GZMM	granzyme M(GZMM)	Homo sapiens				GO:0006508~proteolysis,GO:0006915~apoptotic process,GO:0008219~cell death,GO:0019835~cytolysis,GO:0045087~innate immune response,	GO:0005576~extracellular region,GO:0016020~membrane,	GO:0004252~serine-type endopeptidase activity,GO:0005515~protein binding,GO:0008236~serine-type peptidase activity,	IPR001254:Peptidase S1,IPR001314:Peptidase S1A, chymotrypsin-type,IPR009003:Trypsin-like cysteine/serine peptidase domain,IPR018114:Peptidase S1, trypsin family, active site,				SM00020:Tryp_SPc,	3D-structure,Apoptosis,Complete proteome,Cytolysis,Disulfide bond,Glycoprotein,Hydrolase,Immunity,Innate immunity,Polymorphism,Protease,Proteomics identification,Reference proteome,Secreted,Serine protease,Signal,Zymogen,	active site:Charge relay system,chain:Granzyme M,disulfide bond,domain:Peptidase S1,glycosylation site:N-linked (GlcNAc...),helix,propeptide:Activation peptide,sequence variant,signal peptide,strand,turn,
HCST	hematopoietic cell signal transducer(HCST)	Homo sapiens				GO:0006468~protein phosphorylation,GO:0014068~positive regulation of phosphatidylinositol 3-kinase signaling,GO:0050776~regulation of immune response,	GO:0005886~plasma membrane,GO:0009986~cell surface,GO:0016021~integral component of membrane,	GO:0005102~receptor binding,GO:0005515~protein binding,GO:0043548~phosphatidylinositol 3-kinase binding,	IPR009861:DAP10 membrane,	hsa04650:Natural killer cell mediated cytotoxicity,				Alternative splicing,Complete proteome,Disulfide bond,Glycoprotein,Membrane,Phosphoprotein,Reference proteome,Signal,Transmembrane,Transmembrane helix,	chain:Hematopoietic cell signal transducer,modified residue,mutagenesis site,region of interest:GRB2 binding site,region of interest:PIK3R1 binding site,signal peptide,splice variant,topological domain:Cytoplasmic,topological domain:Extracellular,transmembrane region,
ICOS	inducible T-cell costimulator(ICOS)	Homo sapiens		h_ctla4Pathway:The Co-Stimulatory Signal During T-cell Activation,		GO:0002517~T cell tolerance induction,GO:0006955~immune response,GO:0016337~single organismal cell-cell adhesion,GO:0031295~T cell costimulation,	GO:0005576~extracellular region,GO:0005886~plasma membrane,GO:0005887~integral component of plasma membrane,GO:0009897~external side of plasma membrane,		IPR013106:Immunoglobulin V-set,	hsa04514:Cell adhesion molecules (CAMs),hsa04660:T cell receptor signaling pathway,hsa04672:Intestinal immune network for IgA production,hsa05340:Primary immunodeficiency,	607594~Immunodeficiency, common variable, 1,			Alternative splicing,Cell membrane,Complete proteome,Direct protein sequencing,Disulfide bond,Glycoprotein,Immunoglobulin domain,Membrane,Reference proteome,Secreted,Signal,Transmembrane,Transmembrane helix,	chain:Inducible T-cell costimulator,disulfide bond,domain:Ig-like V-type,glycosylation site:N-linked (GlcNAc...),signal peptide,splice variant,topological domain:Cytoplasmic,topological domain:Extracellular,transmembrane region,
ITGAL	integrin subunit alpha L(ITGAL)	Homo sapiens		h_blymphocytePathway:B Lymphocyte Cell Surface Molecules,h_ctlPathway:CTL mediated immune response against target cells ,h_granulocytesPathway:Adhesion and Diapedesis of Granulocytes,h_LairPathway:Cells and Molecules involved in local acute inflammatory response,h_lymPathway:Adhesion and Diapedesis of Lymphocytes,h_lymphocytePathway:Adhesion Molecules on Lymphocyte,h_monocytePathway:Monocyte and …		GO:0002291~T cell activation via T cell receptor contact with antigen bound to MHC molecule on antigen presenting cell,GO:0006909~phagocytosis,GO:0006928~movement of cell or subcellular component,GO:0006954~inflammatory response,GO:0007155~cell adhesion,GO:0007157~heterophilic cell-cell adhesion via plasma membrane cell adhesion molecules,GO:0007159~leukocyte cell-cell adhesion,GO:0007160~cell-ma…	GO:0005886~plasma membrane,GO:0008305~integrin complex,GO:0009986~cell surface,GO:0016020~membrane,GO:0016021~integral component of membrane,GO:0034687~integrin alphaL-beta2 complex,GO:0070062~extracellular exosome,	GO:0005515~protein binding,GO:0030369~ICAM-3 receptor activity,GO:0032403~protein complex binding,GO:0046872~metal ion binding,GO:0046982~protein heterodimerization activity,GO:0050839~cell adhesion molecule binding,	IPR000413:Integrin alpha chain,IPR002035:von Willebrand factor, type A,IPR013517:FG-GAP repeat,IPR013519:Integrin alpha beta-propellor,IPR013649:Integrin alpha-2,IPR018184:Integrin alpha chain, C-terminal cytoplasmic region, conserved site,	hsa04015:Rap1 signaling pathway,hsa04514:Cell adhesion molecules (CAMs),hsa04650:Natural killer cell mediated cytotoxicity,hsa04670:Leukocyte transendothelial migration,hsa04810:Regulation of actin cytoskeleton,hsa05144:Malaria,hsa05150:Staphylococcus aureus infection,hsa05166:HTLV-I infection,hsa05169:Epstein-Barr virus infection,hsa05323:Rheumatoid arthritis,hsa05416:Viral myocarditis,			SM00191:Int_alpha,SM00327:VWA,	3D-structure,Alternative splicing,Calcium,Cell adhesion,Cell membrane,Complete proteome,Direct protein sequencing,Disulfide bond,Glycoprotein,Integrin,Magnesium,Membrane,Metal-binding,Phagocytosis,Phosphoprotein,Polymorphism,Proteomics identification,Receptor,Reference proteome,Repeat,Signal,Transmembrane,Transmembrane helix,	chain:Integrin alpha-L,disulfide bond,domain:VWFA,glycosylation site:N-linked (GlcNAc...),helix,repeat:FG-GAP 1,repeat:FG-GAP 2,repeat:FG-GAP 3,repeat:FG-GAP 4,repeat:FG-GAP 5,repeat:FG-GAP 6,repeat:FG-GAP 7,sequence conflict,sequence variant,short sequence motif:GFFKR motif,signal peptide,splice variant,strand,topological domain:Cytoplasmic,topological domain:Extracellular,transmembrane region,t…
IFNG	interferon gamma(IFNG)	Homo sapiens	111.Stress_influences_immunity,112.StressandCRHinfluence,113.Th1andTh2cells,13.MS_progression,15.T-cell_polarization-chemokine_receptors,17.Activators-CAM,18.Cytokine_astocytes,19.Cytokine_microglia,20.Cytokine_oligodendrocytes,21.Cytokine_neurons,22.Cytokine-chemokine_CNS,35.Chemokines_EAE_Autoreactive_T_Cells,56.Macrophage_regulation_of_CD4+T_cells,58.(CD40L)_immnosurveillance,59.L-type_Ca2+_Ta…	h_41BBPathway:The 4-1BB-dependent immune response,h_cytokinePathway:Cytokine Network,h_dcPathway:Dendritic cells in regulating TH1 and TH2 Development,h_granulocytesPathway:Adhesion and Diapedesis of Granulocytes,h_ifngPathway:IFN gamma signaling pathway ,h_il12Pathway:IL12 and Stat4 Dependent Signaling Pathway in Th1 Development,h_il18Pathway:IL 18 Signaling Pathway,h_inflamPathway:Cytokines and…		GO:0000060~protein import into nucleus, translocation,GO:0000122~negative regulation of transcription from RNA polymerase II promoter,GO:0001781~neutrophil apoptotic process,GO:0002026~regulation of the force of heart contraction,GO:0002250~adaptive immune response,GO:0002302~CD8-positive, alpha-beta T cell differentiation involved in immune response,GO:0006915~apoptotic process,GO:0006928~moveme…	GO:0005576~extracellular region,GO:0005615~extracellular space,GO:0005737~cytoplasm,GO:0009897~external side of plasma membrane,GO:0043005~neuron projection,GO:0043204~perikaryon,	GO:0005125~cytokine activity,GO:0005133~interferon-gamma receptor binding,	IPR002069:Interferon gamma,IPR009079:Four-helical cytokine-like, core,IPR012351:Four-helical cytokine, core,	hsa03050:Proteasome,hsa04060:Cytokine-cytokine receptor interaction,hsa04066:HIF-1 signaling pathway,hsa04350:TGF-beta signaling pathway,hsa04380:Osteoclast differentiation,hsa04612:Antigen processing and presentation,hsa04630:Jak-STAT signaling pathway,hsa04650:Natural killer cell mediated cytotoxicity,hsa04660:T cell receptor signaling pathway,hsa04940:Type I diabetes mellitus,hsa05132:Salmonel…	607948~Tuberculosis, protection against,609135~Aplastic anemia,609423~AIDS, rapid progression to,609532~Hepatitis C virus, response to therapy of,613254~TSC2 angiomyolipomas, renal, modifier of,	PIRSF001936:interferon gamma,		3D-structure,Antiviral defense,Cleavage on pair of basic residues,Complete proteome,Cytokine,Direct protein sequencing,Glycoprotein,Growth regulation,Pharmaceutical,Polymorphism,Pyrrolidone carboxylic acid,Reference proteome,Secreted,Signal,	chain:Interferon gamma,glycosylation site:N-linked (GlcNAc...),glycosylation site:N-linked (GlcNAc...); in dimeric form,helix,modified residue,sequence variant,signal peptide,turn,
IL12RB1	interleukin 12 receptor subunit beta 1(IL12RB1)	Homo sapiens		h_il12Pathway:IL12 and Stat4 Dependent Signaling Pathway in Th1 Development,h_nktPathway:Selective expression of chemokine receptors during T-cell polarization,h_no2il12Pathway:NO2-dependent IL 12 Pathway in NK cells,h_th1th2Pathway:Th1/Th2 Differentiation,		GO:0001916~positive regulation of T cell mediated cytotoxicity,GO:0002230~positive regulation of defense response to virus by host,GO:0002827~positive regulation of T-helper 1 type immune response,GO:0007165~signal transduction,GO:0018108~peptidyl-tyrosine phosphorylation,GO:0019221~cytokine-mediated signaling pathway,GO:0032729~positive regulation of interferon-gamma production,GO:0035722~interl…	GO:0005886~plasma membrane,GO:0009897~external side of plasma membrane,GO:0042022~interleukin-12 receptor complex,GO:0072536~interleukin-23 receptor complex,	GO:0004896~cytokine receptor activity,GO:0005143~interleukin-12 receptor binding,GO:0016517~interleukin-12 receptor activity,GO:0042019~interleukin-23 binding,GO:0042020~interleukin-23 receptor activity,	IPR003529:Long hematopoietin receptor, Gp130 family 2, conserved site,IPR003961:Fibronectin, type III,IPR013783:Immunoglobulin-like fold,	hsa04060:Cytokine-cytokine receptor interaction,hsa04630:Jak-STAT signaling pathway,hsa05321:Inflammatory bowel disease (IBD),	614891~Immunodeficiency 30,		SM00060:FN3,	Alternative splicing,Complete proteome,Disease mutation,Disulfide bond,Glycoprotein,Membrane,Polymorphism,Receptor,Reference proteome,Repeat,Signal,Transmembrane,Transmembrane helix,	chain:Interleukin-12 receptor subunit beta-1,disulfide bond,domain:Fibronectin type-III 1,domain:Fibronectin type-III 2,domain:Fibronectin type-III 3,domain:Fibronectin type-III 4,domain:Fibronectin type-III 5,glycosylation site:N-linked (GlcNAc...),sequence variant,short sequence motif:Box 1 motif,short sequence motif:WSXWS motif,signal peptide,splice variant,topological domain:Cytoplasmic,topol…
IL2RB	interleukin 2 receptor subunit beta(IL2RB)	Homo sapiens		h_il2Pathway:IL 2 signaling pathway,h_il2rbPathway:IL-2 Receptor Beta Chain in T cell Activation,		GO:0000165~MAPK cascade,GO:0006461~protein complex assembly,GO:0007165~signal transduction,GO:0016032~viral process,GO:0019221~cytokine-mediated signaling pathway,GO:0038110~interleukin-2-mediated signaling pathway,GO:0043066~negative regulation of apoptotic process,GO:0043547~positive regulation of GTPase activity,	GO:0005622~intracellular,GO:0005886~plasma membrane,GO:0005887~integral component of plasma membrane,GO:0009897~external side of plasma membrane,GO:0016020~membrane,	GO:0004911~interleukin-2 receptor activity,GO:0005088~Ras guanyl-nucleotide exchange factor activity,GO:0005515~protein binding,GO:0019976~interleukin-2 binding,	IPR003531:Short hematopoietin receptor, family 1, conserved site,IPR003961:Fibronectin, type III,IPR013783:Immunoglobulin-like fold,	hsa04060:Cytokine-cytokine receptor interaction,hsa04144:Endocytosis,hsa04151:PI3K-Akt signaling pathway,hsa04630:Jak-STAT signaling pathway,hsa05162:Measles,hsa05166:HTLV-I infection,hsa05202:Transcriptional misregulation in cancer,			SM00060:FN3,	3D-structure,Complete proteome,Disulfide bond,Glycoprotein,Host-virus interaction,Membrane,Polymorphism,Proteomics identification,Receptor,Reference proteome,Signal,Transmembrane,Transmembrane helix,	chain:Interleukin-2 receptor subunit beta,disulfide bond,domain:Fibronectin type-III,glycosylation site:N-linked (GlcNAc...),helix,mutagenesis site,sequence variant,short sequence motif:Box 1 motif,short sequence motif:WSXWS motif,signal peptide,strand,topological domain:Cytoplasmic,topological domain:Extracellular,transmembrane region,
IL2RG	interleukin 2 receptor subunit gamma(IL2RG)	Homo sapiens		h_il2Pathway:IL 2 signaling pathway,h_il2rbPathway:IL-2 Receptor Beta Chain in T cell Activation,h_il4Pathway:IL 4 signaling pathway,h_il7Pathway:IL-7 Signal Transduction,		GO:0000165~MAPK cascade,GO:0006955~immune response,GO:0007165~signal transduction,GO:0016032~viral process,GO:0035771~interleukin-4-mediated signaling pathway,GO:0038110~interleukin-2-mediated signaling pathway,GO:0038111~interleukin-7-mediated signaling pathway,GO:0043547~positive regulation of GTPase activity,	GO:0005622~intracellular,GO:0005886~plasma membrane,GO:0005887~integral component of plasma membrane,GO:0009897~external side of plasma membrane,GO:0016020~membrane,GO:0016021~integral component of membrane,	GO:0004896~cytokine receptor activity,GO:0004911~interleukin-2 receptor activity,GO:0004913~interleukin-4 receptor activity,GO:0004917~interleukin-7 receptor activity,GO:0005088~Ras guanyl-nucleotide exchange factor activity,GO:0005515~protein binding,GO:0019976~interleukin-2 binding,	IPR003531:Short hematopoietin receptor, family 1, conserved site,IPR003961:Fibronectin, type III,IPR013783:Immunoglobulin-like fold,IPR015321:Interleukin-6 receptor alpha chain, binding,	hsa04060:Cytokine-cytokine receptor interaction,hsa04144:Endocytosis,hsa04151:PI3K-Akt signaling pathway,hsa04630:Jak-STAT signaling pathway,hsa05162:Measles,hsa05166:HTLV-I infection,hsa05321:Inflammatory bowel disease (IBD),hsa05340:Primary immunodeficiency,	300400~Severe combined immunodeficiency, X-linked,312863~Combined immunodeficiency, X-linked, moderate,			3D-structure,Alternative splicing,Complete proteome,Direct protein sequencing,Disease mutation,Disulfide bond,Glycoprotein,Host-virus interaction,Membrane,Phosphoprotein,Polymorphism,Proteomics identification,Receptor,Reference proteome,SCID,Signal,Transmembrane,Transmembrane helix,	chain:Cytokine receptor common subunit gamma,disulfide bond,domain:Fibronectin type-III,glycosylation site:N-linked (GlcNAc...),helix,modified residue,sequence variant,short sequence motif:Box 1 motif,short sequence motif:WSXWS motif,signal peptide,strand,topological domain:Cytoplasmic,topological domain:Extracellular,transmembrane region,turn,
IL21R	interleukin 21 receptor(IL21R)	Homo sapiens				GO:0030101~natural killer cell activation,GO:0038114~interleukin-21-mediated signaling pathway,	GO:0016021~integral component of membrane,	GO:0001532~interleukin-21 receptor activity,	IPR003531:Short hematopoietin receptor, family 1, conserved site,IPR003961:Fibronectin, type III,IPR013783:Immunoglobulin-like fold,	hsa04060:Cytokine-cytokine receptor interaction,hsa04630:Jak-STAT signaling pathway,hsa05321:Inflammatory bowel disease (IBD),	147050~IgE, elevated level of,615207~Immunodeficiency, primary, autosomal recessive, IL21R-related,			3D-structure,Chromosomal rearrangement,Complete proteome,Direct protein sequencing,Disease mutation,Disulfide bond,Glycoprotein,Membrane,Polymorphism,Receptor,Reference proteome,Repeat,Signal,Transmembrane,Transmembrane helix,	chain:Interleukin-21 receptor,disulfide bond,domain:Fibronectin type-III,glycosylation site:N-linked (GlcNAc...),sequence conflict,sequence variant,short sequence motif:Box 1 motif,short sequence motif:WSXWS motif,signal peptide,topological domain:Cytoplasmic,topological domain:Extracellular,transmembrane region,
JAKMIP1	janus kinase and microtubule interacting protein 1(JAKMIP1)	Homo sapiens				GO:0015031~protein transport,GO:0050890~cognition,	GO:0005737~cytoplasm,GO:0005874~microtubule,GO:0019898~extrinsic component of membrane,GO:0030529~intracellular ribonucleoprotein complex,	GO:0003723~RNA binding,GO:0005515~protein binding,GO:0008017~microtubule binding,GO:0019894~kinesin binding,GO:0019900~kinase binding,GO:0050811~GABA receptor binding,	IPR024836:Janus kinase and microtubule-interacting protein,					Alternative splicing,Coiled coil,Complete proteome,Cytoplasm,Cytoskeleton,Membrane,Microtubule,Phosphoprotein,Polymorphism,Protein transport,Proteomics identification,Reference proteome,Transmembrane,Transmembrane helix,Transport,	chain:Janus kinase and microtubule-interacting protein 1,modified residue,region of interest:Mediates association with microtubules,region of interest:Mediates interaction with TYK2 and GABBR1,sequence conflict,sequence variant,splice variant,
KLRK1	killer cell lectin like receptor K1(KLRK1)	Homo sapiens				GO:0002223~stimulatory C-type lectin receptor signaling pathway,GO:0002250~adaptive immune response,GO:0007165~signal transduction,GO:0030101~natural killer cell activation,GO:0030154~cell differentiation,GO:0031295~T cell costimulation,GO:0032729~positive regulation of interferon-gamma production,GO:0034260~negative regulation of GTPase activity,GO:0045087~innate immune response,GO:0045429~posit…	GO:0005886~plasma membrane,GO:0005887~integral component of plasma membrane,GO:0009897~external side of plasma membrane,GO:0009986~cell surface,GO:0016021~integral component of membrane,	GO:0004872~receptor activity,GO:0005515~protein binding,GO:0030246~carbohydrate binding,GO:0032394~MHC class Ib receptor activity,GO:0042288~MHC class I protein binding,GO:0042803~protein homodimerization activity,	IPR001304:C-type lectin,IPR016186:C-type lectin-like,IPR016187:C-type lectin fold,	hsa04650:Natural killer cell mediated cytotoxicity,hsa05144:Malaria,			SM00034:CLECT,	3D-structure,Adaptive immunity,Alternative splicing,Cell membrane,Complete proteome,Differentiation,Disulfide bond,Glycoprotein,Immunity,Innate immunity,Lectin,Membrane,Polymorphism,Receptor,Reference proteome,Signal-anchor,Transmembrane,Transmembrane helix,	chain:NKG2-D type II integral membrane protein,disulfide bond,domain:C-type lectin,glycosylation site:N-linked (GlcNAc...),helix,sequence conflict,sequence variant,strand,topological domain:Cytoplasmic,topological domain:Extracellular,transmembrane region,turn,
LAG3	lymphocyte activating 3(LAG3)	Homo sapiens				GO:0007166~cell surface receptor signaling pathway,GO:0045085~negative regulation of interleukin-2 biosynthetic process,GO:0045954~positive regulation of natural killer cell mediated cytotoxicity,GO:0050868~negative regulation of T cell activation,	GO:0009897~external side of plasma membrane,GO:0016021~integral component of membrane,	GO:0003823~antigen binding,GO:0004888~transmembrane signaling receptor activity,GO:0042289~MHC class II protein binding,	IPR003599:Immunoglobulin subtype,IPR007110:Immunoglobulin-like domain,IPR013783:Immunoglobulin-like fold,IPR015621:Interleukin-1 receptor family,				SM00409:IG,	Alternative splicing,Complete proteome,Disulfide bond,Glycoprotein,Immunoglobulin domain,Membrane,Polymorphism,Reference proteome,Repeat,Signal,Transmembrane,Transmembrane helix,	chain:Lymphocyte activation gene 3 protein,disulfide bond,domain:Ig-like C2-type 1,domain:Ig-like C2-type 2,domain:Ig-like C2-type 3,domain:Ig-like V-type,glycosylation site:N-linked (GlcNAc...),region of interest:12 X 2 AA tandem repeats of E-X,sequence variant,signal peptide,topological domain:Cytoplasmic,topological domain:Extracellular,transmembrane region,
LTA	lymphotoxin alpha(LTA)	Homo sapiens	113.Th1andTh2cells,80.T_cell_Activation,96.Immune_injury_MS-lesions_genetic_environ,97.Immune_injury_MS-lesions_MS_antigen,	h_cytokinePathway:Cytokine Network,h_inflamPathway:Cytokines and Inflammatory Response,h_stressPathway:TNF/Stress Related Signaling,h_tnfr2Pathway:TNFR2 Signaling Pathway,		GO:0001666~response to hypoxia,GO:0002876~positive regulation of chronic inflammatory response to antigenic stimulus,GO:0002925~positive regulation of humoral immune response mediated by circulating immunoglobulin,GO:0006915~apoptotic process,GO:0006955~immune response,GO:0006959~humoral immune response,GO:0007165~signal transduction,GO:0007267~cell-cell signaling,GO:0007584~response to nutrient,…	GO:0005615~extracellular space,GO:0005886~plasma membrane,GO:0016020~membrane,	GO:0005102~receptor binding,GO:0005125~cytokine activity,GO:0005164~tumor necrosis factor receptor binding,	IPR002960:Tumour necrosis factor beta/lymphotoxin alpha,IPR006052:Tumour necrosis factor,IPR006053:Tumour necrosis factor alpha/beta/c,IPR008983:Tumour necrosis factor-like domain,IPR021184:Tumour necrosis factor, conserved site,	hsa04060:Cytokine-cytokine receptor interaction,hsa04064:NF-kappa B signaling pathway,hsa04668:TNF signaling pathway,hsa04940:Type I diabetes mellitus,hsa05166:HTLV-I infection,hsa05168:Herpes simplex infection,	607507~Psoriatic arthritis, susceptibility to,608446~Myocardial infarction, susceptibility to,610988~Leprosy, susceptibility to, 4,		SM00207:TNF,	3D-structure,Complete proteome,Cytokine,Direct protein sequencing,Glycoprotein,Membrane,Polymorphism,Reference proteome,Secreted,Signal,	chain:lymphotoxin alpha,chain:Lymphotoxin-alpha,glycosylation site:N-linked (GlcNAc...),glycosylation site:O-linked (GalNAc...); partial,helix,sequence variant,signal peptide,strand,turn,
MAP4K1	mitogen-activated protein kinase kinase kinase kinase 1(MAP4K1)	Homo sapiens		h_mapkPathway:MAPKinase Signaling Pathway,h_metPathway:Signaling of Hepatocyte Growth Factor Receptor,		GO:0000185~activation of MAPKKK activity,GO:0006468~protein phosphorylation,GO:0006950~response to stress,GO:0007257~activation of JUN kinase activity,GO:0008283~cell proliferation,GO:0018105~peptidyl-serine phosphorylation,GO:0035556~intracellular signal transduction,GO:0046777~protein autophosphorylation,	GO:0005622~intracellular,GO:0005737~cytoplasm,GO:0016020~membrane,	GO:0004672~protein kinase activity,GO:0004674~protein serine/threonine kinase activity,GO:0005515~protein binding,GO:0005524~ATP binding,GO:0008349~MAP kinase kinase kinase kinase activity,	IPR000719:Protein kinase, catalytic domain,IPR001180:Citron-like,IPR011009:Protein kinase-like domain,IPR017441:Protein kinase, ATP binding site,IPR021160:Mitogen-activated protein (MAP) kinase kinase kinase kinase,	hsa04010:MAPK signaling pathway,		PIRSF038172:mitogen-activated protein kinase kinase kinase kinase,	SM00036:CNH,SM00220:S_TKc,	Alternative splicing,ATP-binding,Complete proteome,Kinase,Nucleotide-binding,Phosphoprotein,Polymorphism,Proteomics identification,Reference proteome,Serine/threonine-protein kinase,Transferase,Ubl conjugation,	active site:Proton acceptor,binding site:ATP,chain:Mitogen-activated protein kinase kinase kinase kinase 1,domain:CNH,domain:Protein kinase,modified residue,nucleotide phosphate-binding region:ATP,sequence variant,
NKG7	natural killer cell granule protein 7(NKG7)	Homo sapiens					GO:0005887~integral component of plasma membrane,GO:0016021~integral component of membrane,	GO:0005515~protein binding,	IPR004031:PMP-22/EMP/MP20/Claudin,IPR004032:PMP-22/EMP/MP20,					Cell membrane,Complete proteome,Direct protein sequencing,Membrane,Reference proteome,Transmembrane,Transmembrane helix,	chain:Protein NKG7,transmembrane region,
PRF1	perforin 1(PRF1)	Homo sapiens		h_caspasePathway:Caspase Cascade in Apoptosis,h_ctlPathway:CTL mediated immune response against target cells ,h_d4gdiPathway:D4-GDI Signaling Pathway,h_setPathway:Granzyme A mediated Apoptosis Pathway,		GO:0001771~immunological synapse formation,GO:0002357~defense response to tumor cell,GO:0002418~immune response to tumor cell,GO:0006915~apoptotic process,GO:0006968~cellular defense response,GO:0019835~cytolysis,GO:0051260~protein homooligomerization,GO:0051607~defense response to virus,GO:0055085~transmembrane transport,	GO:0005576~extracellular region,GO:0005886~plasma membrane,GO:0016020~membrane,GO:0016021~integral component of membrane,GO:0016023~cytoplasmic, membrane-bounded vesicle,GO:0031904~endosome lumen,GO:0044194~cytolytic granule,	GO:0005509~calcium ion binding,GO:0005515~protein binding,GO:0022829~wide pore channel activity,	IPR000008:C2 calcium-dependent membrane targeting,IPR020863:Membrane attack complex component/perforin domain, conserved site,IPR020864:Membrane attack complex component/perforin (MACPF) domain,	hsa04650:Natural killer cell mediated cytotoxicity,hsa04940:Type I diabetes mellitus,hsa05320:Autoimmune thyroid disease,hsa05330:Allograft rejection,hsa05332:Graft-versus-host disease,hsa05416:Viral myocarditis,	603553~Hemophagocytic lymphohistiocytosis, familial, 2,605027~Lymphoma, non-Hodgkin,609135~Aplastic anemia,		SM00239:C2,SM00457:MACPF,	Calcium,Cell membrane,Complete proteome,Cytolysis,Disease mutation,Disulfide bond,EGF-like domain,Endosome,Familial hemophagocytic lymphohistiocytosis,Glycoprotein,Membrane,Metal-binding,Polymorphism,Reference proteome,Secreted,Signal,Transmembrane,Transmembrane beta strand,	chain:Perforin-1,disulfide bond,domain:C2,domain:EGF-like,domain:MACPF,glycosylation site:N-linked (GlcNAc...),sequence conflict,sequence variant,signal peptide,site:Important for oligomerization,transmembrane region,
PSTPIP1	proline-serine-threonine phosphatase interacting protein 1(PSTPIP1)	Homo sapiens				GO:0006897~endocytosis,GO:0006954~inflammatory response,GO:0007155~cell adhesion,GO:0007165~signal transduction,GO:0016477~cell migration,GO:0045087~innate immune response,	GO:0001931~uropod,GO:0005829~cytosol,GO:0005856~cytoskeleton,GO:0005886~plasma membrane,GO:0016020~membrane,GO:0030027~lamellipodium,GO:0032154~cleavage furrow,GO:0048471~perinuclear region of cytoplasm,	GO:0005515~protein binding,	IPR001060:FCH domain,IPR001452:Src homology-3 domain,IPR013315:Spectrin alpha chain, SH3 domain,	hsa04621:NOD-like receptor signaling pathway,	604416~Pyogenic sterile arthritis, pyoderma gangrenosum, and acne,		SM00055:FCH,SM00326:SH3,	3D-structure,Alternative splicing,Cell adhesion,Cell membrane,Cell projection,Coiled coil,Complete proteome,Cytoplasm,Cytoskeleton,Disease mutation,Endocytosis,Immunity,Inflammatory response,Innate immunity,Membrane,Phosphoprotein,Polymorphism,Proteomics identification,Reference proteome,SH3 domain,	chain:Proline-serine-threonine phosphatase- interacting protein 1,domain:FCH,domain:SH3,helix,mutagenesis site,sequence conflict,sequence variant,splice variant,strand,
PTPN7	protein tyrosine phosphatase, non-receptor type 7(PTPN7)	Homo sapiens		h_tcrPathway:T Cell Receptor Signaling Pathway,		GO:0006470~protein dephosphorylation,GO:0035335~peptidyl-tyrosine dephosphorylation,	GO:0005737~cytoplasm,GO:0005829~cytosol,GO:0005856~cytoskeleton,GO:0009898~cytoplasmic side of plasma membrane,	GO:0004725~protein tyrosine phosphatase activity,GO:0005515~protein binding,	IPR000242:Protein-tyrosine phosphatase, receptor/non-receptor type,IPR000387:Protein-tyrosine/Dual specificity phosphatase,IPR003595:Protein-tyrosine phosphatase, catalytic,IPR008356:Protein-tyrosine phosphatase, KIM-containing,IPR016130:Protein-tyrosine phosphatase, active site,	hsa04010:MAPK signaling pathway,			SM00194:PTPc,SM00404:PTPc_motif,	3D-structure,Alternative splicing,Complete proteome,Cytoplasm,Cytoskeleton,Hydrolase,Oxidation,Phosphoprotein,Protein phosphatase,Proteomics identification,Receptor,Reference proteome,	active site:Phosphocysteine intermediate,binding site:Substrate,chain:Tyrosine-protein phosphatase non-receptor type 7,domain:Tyrosine-protein phosphatase,helix,modified residue,mutagenesis site,region of interest:Interaction with MAP kinases,region of interest:Substrate binding,sequence conflict,splice variant,strand,
PTPRCAP	protein tyrosine phosphatase, receptor type C associated protein(PTPRCAP)	Homo sapiens				GO:0006952~defense response,	GO:0005886~plasma membrane,GO:0016021~integral component of membrane,		IPR016553:Receptor tyrosine-protein phosphatase C-associated protein CD45-AP,			PIRSF009325:receptor tyrosine-protein phosphatase C-associated protein CD45-AP,		Complete proteome,Membrane,Phosphoprotein,Polymorphism,Reference proteome,Transmembrane,Transmembrane helix,	chain:Protein tyrosine phosphatase receptor type C-associated protein,modified residue,sequence variant,transmembrane region,
P2RY10	purinergic receptor P2Y10(P2RY10)	Homo sapiens				GO:0035025~positive regulation of Rho protein signal transduction,GO:0035589~G-protein coupled purinergic nucleotide receptor signaling pathway,GO:0051482~positive regulation of cytosolic calcium ion concentration involved in phospholipase C-activating G-protein coupled signaling pathway,	GO:0005886~plasma membrane,GO:0005887~integral component of plasma membrane,GO:0016021~integral component of membrane,	GO:0004930~G-protein coupled receptor activity,GO:0045028~G-protein coupled purinergic nucleotide receptor activity,	IPR000276:G protein-coupled receptor, rhodopsin-like,IPR017452:GPCR, rhodopsin-like, 7TM,	hsa04080:Neuroactive ligand-receptor interaction,				Cell membrane,Complete proteome,Disulfide bond,G-protein coupled receptor,Glycoprotein,Membrane,Polymorphism,Receptor,Reference proteome,Transducer,Transmembrane,Transmembrane helix,	chain:Putative P2Y purinoceptor 10,disulfide bond,glycosylation site:N-linked (GlcNAc...),sequence variant,topological domain:Cytoplasmic,topological domain:Extracellular,transmembrane region,
PYHIN1	pyrin and HIN domain family member 1(PYHIN1)	Homo sapiens				GO:0007049~cell cycle,	GO:0016607~nuclear speck,		IPR004020:DAPIN domain,IPR004021:HIN-200/IF120x,				SM01289:SM01289,	Alternative splicing,Cell cycle,Complete proteome,Nucleus,Proteomics identification,Reference proteome,Tumor suppressor,	chain:Pyrin and HIN domain-containing protein 1,domain:DAPIN,domain:HIN-200,splice variant,
SIRPG	signal regulatory protein gamma(SIRPG)	Homo sapiens				GO:0007155~cell adhesion,GO:0007267~cell-cell signaling,GO:0008284~positive regulation of cell proliferation,GO:0008285~negative regulation of cell proliferation,GO:0022409~positive regulation of cell-cell adhesion,GO:0035556~intracellular signal transduction,GO:0050870~positive regulation of T cell activation,GO:0050900~leukocyte migration,	GO:0005622~intracellular,GO:0005886~plasma membrane,GO:0016020~membrane,GO:0016021~integral component of membrane,	GO:0005515~protein binding,	IPR003597:Immunoglobulin C1-set,IPR003599:Immunoglobulin subtype,IPR007110:Immunoglobulin-like domain,IPR013106:Immunoglobulin V-set,IPR013783:Immunoglobulin-like fold,	hsa04380:Osteoclast differentiation,			SM00406:IGv,SM00407:IGc1,SM00409:IG,	3D-structure,Alternative splicing,Cell adhesion,Complete proteome,Disulfide bond,Glycoprotein,Immunoglobulin domain,Membrane,Polymorphism,Reference proteome,Repeat,Signal,Transmembrane,Transmembrane helix,	chain:Signal-regulatory protein gamma,disulfide bond,domain:Ig-like C1-type 1,domain:Ig-like C1-type 2,domain:Ig-like V-type,glycosylation site:N-linked (GlcNAc...),helix,sequence variant,signal peptide,splice variant,strand,topological domain:Cytoplasmic,topological domain:Extracellular,transmembrane region,
SLAMF1	signaling lymphocytic activation molecule family member 1(SLAMF1)	Homo sapiens				GO:0001779~natural killer cell differentiation,GO:0001787~natural killer cell proliferation,GO:0002277~myeloid dendritic cell activation involved in immune response,GO:0002725~negative regulation of T cell cytokine production,GO:0006909~phagocytosis,GO:0007155~cell adhesion,GO:0007165~signal transduction,GO:0008284~positive regulation of cell proliferation,GO:0031338~regulation of vesicle fusion,…	GO:0009897~external side of plasma membrane,GO:0009986~cell surface,GO:0016021~integral component of membrane,GO:0045335~phagocytic vesicle,GO:0070062~extracellular exosome,	GO:0001618~virus receptor activity,GO:0003823~antigen binding,GO:0004872~receptor activity,GO:0004888~transmembrane signaling receptor activity,GO:0005515~protein binding,	IPR007110:Immunoglobulin-like domain,IPR010407:Signaling lymphocytic activation molecule, N-terminal,	hsa05162:Measles,				3D-structure,Adaptive immunity,Alternative splicing,Cell adhesion,Cell membrane,Complete proteome,Disulfide bond,Glycoprotein,Host cell receptor for virus entry,Host-virus interaction,Immunity,Immunoglobulin domain,Innate immunity,Membrane,Phagocytosis,Phosphoprotein,Polymorphism,Proteomics identification,Receptor,Reference proteome,Repeat,Secreted,Signal,Transmembrane,Transmembrane helix,	chain:Signaling lymphocytic activation molecule,disulfide bond,domain:Ig-like C2-type,domain:Ig-like V-type,glycosylation site:N-linked (GlcNAc...),modified residue,sequence variant,short sequence motif:SH2-binding,signal peptide,splice variant,strand,topological domain:Cytoplasmic,topological domain:Extracellular,transmembrane region,
SIT1	signaling threshold regulating transmembrane adaptor 1(SIT1)	Homo sapiens				GO:0002250~adaptive immune response,GO:0007165~signal transduction,GO:0043029~T cell homeostasis,GO:0050863~regulation of T cell activation,	GO:0005886~plasma membrane,GO:0005887~integral component of plasma membrane,GO:0016021~integral component of membrane,GO:0070062~extracellular exosome,	GO:0005515~protein binding,GO:0019900~kinase binding,GO:0042169~SH2 domain binding,						Adaptive immunity,Cell membrane,Complete proteome,Direct protein sequencing,Disulfide bond,Glycoprotein,Immunity,Membrane,Phosphoprotein,Proteomics identification,Reference proteome,Signal,Transmembrane,Transmembrane helix,	chain:Signaling threshold-regulating transmembrane adapter 1,disulfide bond,glycosylation site:N-linked (GlcNAc...),modified residue,mutagenesis site,region of interest:Interaction with CSK,region of interest:Interaction with GRB2,region of interest:Interaction with PTPN11,signal peptide,topological domain:Cytoplasmic,topological domain:Extracellular,transmembrane region,
UBASH3A	ubiquitin associated and SH3 domain containing A(UBASH3A)	Homo sapiens			Posttranslational modification, protein turnover, chaperones,	GO:0001817~regulation of cytokine production,GO:0050860~negative regulation of T cell receptor signaling pathway,	GO:0005634~nucleus,GO:0005829~cytosol,GO:0070062~extracellular exosome,	GO:0005515~protein binding,	IPR001452:Src homology-3 domain,IPR009060:UBA-like,IPR009097:RNA ligase/cyclic nucleotide phosphodiesterase,IPR013078:Histidine phosphatase superfamily, clade-1,IPR015940:Ubiquitin-associated/translation elongation factor EF1B, N-terminal, eukaryote,				SM00326:SH3,	3D-structure,Alternative splicing,Complete proteome,Cytoplasm,Nucleus,Polymorphism,Proteomics identification,Reference proteome,SH3 domain,	chain:Ubiquitin-associated and SH3 domain- containing protein A,domain:SH3,domain:UBA,helix,mutagenesis site,sequence conflict,sequence variant,splice variant,strand,
ZAP70	zeta chain of T cell receptor associated protein kinase 70(ZAP70)	Homo sapiens	3.T_cell_receptor,54.T-cell_anergy,63.LAT_couples_T-cell_receptor,82.TCR_and_Cap_or_SMAC,	h_cskPathway:Activation of Csk by cAMP-dependent Protein Kinase Inhibits Signaling through the T Cell Receptor,h_tcraPathway:Lck and Fyn tyrosine kinases in initiation of TCR Activation,h_tcrPathway:T Cell Receptor Signaling Pathway,		GO:0002250~adaptive immune response,GO:0002281~macrophage activation involved in immune response,GO:0002283~neutrophil activation involved in immune response,GO:0006468~protein phosphorylation,GO:0006954~inflammatory response,GO:0006955~immune response,GO:0007169~transmembrane receptor protein tyrosine kinase signaling pathway,GO:0018108~peptidyl-tyrosine phosphorylation,GO:0030217~T cell differe…	GO:0001772~immunological synapse,GO:0005737~cytoplasm,GO:0005829~cytosol,GO:0005886~plasma membrane,GO:0005911~cell-cell junction,GO:0031234~extrinsic component of cytoplasmic side of plasma membrane,GO:0042101~T cell receptor complex,GO:0045121~membrane raft,	GO:0004713~protein tyrosine kinase activity,GO:0004715~non-membrane spanning protein tyrosine kinase activity,GO:0005102~receptor binding,GO:0005515~protein binding,GO:0005524~ATP binding,	IPR000719:Protein kinase, catalytic domain,IPR000980:SH2 domain,IPR001245:Serine-threonine/tyrosine-protein kinase catalytic domain,IPR008266:Tyrosine-protein kinase, active site,IPR011009:Protein kinase-like domain,IPR012234:Tyrosine-protein kinase, non-receptor SYK/ZAP-70,IPR017441:Protein kinase, ATP binding site,IPR020635:Tyrosine-protein kinase, catalytic domain,IPR023420:Tyrosine-protein ki…	hsa04014:Ras signaling pathway,hsa04064:NF-kappa B signaling pathway,hsa04650:Natural killer cell mediated cytotoxicity,hsa04660:T cell receptor signaling pathway,hsa05340:Primary immunodeficiency,	269840~Selective T-cell defect,	PIRSF000604:tyrosine-protein kinase, SYK/ZAP-70 type,	SM00219:TyrKc,SM00252:SH2,	3D-structure,Acetylation,Adaptive immunity,Alternative splicing,ATP-binding,Cell membrane,Complete proteome,Cytoplasm,Disease mutation,Immunity,Kinase,Membrane,Nucleotide-binding,Phosphoprotein,Polymorphism,Reference proteome,Repeat,SCID,SH2 domain,Transferase,Tyrosine-protein kinase,	active site:Proton acceptor,binding site:ATP,chain:Tyrosine-protein kinase ZAP-70,domain:Protein kinase,domain:SH2 1,domain:SH2 2,helix,modified residue,mutagenesis site,nucleotide phosphate-binding region:ATP,sequence variant,splice variant,strand,turn,
ZNF831	zinc finger protein 831(ZNF831)	Homo sapiens				GO:0006355~regulation of transcription, DNA-templated,GO:0006366~transcription from RNA polymerase II promoter,GO:0007165~signal transduction,GO:0007275~multicellular organism development,	GO:0005634~nucleus,	GO:0003700~transcription factor activity, sequence-specific DNA binding,GO:0043565~sequence-specific DNA binding,GO:0044212~transcription regulatory region DNA binding,GO:0046872~metal ion binding,	IPR007087:Zinc finger, C2H2,IPR013087:Zinc finger C2H2-type/integrase DNA-binding domain,IPR015880:Zinc finger, C2H2-like,				SM00355:ZnF_C2H2,	Coiled coil,Complete proteome,Metal-binding,Polymorphism,Reference proteome,Repeat,Zinc,Zinc-finger,	chain:Zinc finger protein 831,compositionally biased region:Pro-rich,sequence variant,zinc finger region:C2H2-type 1,zinc finger region:C2H2-type 2,
SEPTIN1	septin 1(SEPT1)	Homo sapiens			Cell division and chromosome partitioning / Cytoskeleton,	GO:0007049~cell cycle,GO:0007056~spindle assembly involved in female meiosis,GO:0051301~cell division,GO:0051311~meiotic metaphase plate congression,	GO:0005737~cytoplasm,GO:0005815~microtubule organizing center,GO:0030496~midbody,GO:0072687~meiotic spindle,	GO:0005515~protein binding,GO:0005525~GTP binding,GO:0042802~identical protein binding,	IPR016491:Septin,IPR027417:P-loop containing nucleoside triphosphate hydrolase,	hsa05100:Bacterial invasion of epithelial cells,	PIRSF006698:septin,	Alternative splicing,Cell cycle,Cell division,Coiled coil,Complete proteome,Cytoplasm,Cytoskeleton,GTP-binding,Nucleotide-binding,Phosphoprotein,Polymorphism,Proteomics identification,Reference proteome,	binding site:GTP,binding site:GTP; via amide nitrogen and carbonyl oxygen,chain:Septin-1,modified residue,mutagenesis site,nucleotide phosphate-binding region:GTP,sequence conflict,sequence variant,splice variant,
Not Found	LINC00426: long intergenic Non-protein coding RNA 426
Note:	SEPTIN1 queried as SEPT1
										hsa05100 Bacterial invasion of epithelial cells

## Sheet: Exclusion1_GOTERM
ID	Gene Name	Basis of Exclusion	GOTERM_BP_DIRECT
ACAP1	ArfGAP with coiled-coil, ankyrin repeat and PH domains 1(ACAP1)		GO:0015031~protein transport,GO:0043547~positive regulation of GTPase activity,
CCL5	C-C motif chemokine ligand 5(CCL5)	GO:0010820~positive regulation of T cell chemotaxis	GO:0000165~MAPK cascade,GO:0002407~dendritic cell chemotaxis,GO:0002548~monocyte chemotaxis,GO:0002676~regulation of chronic inflammatory response,GO:0006816~calcium ion transport,GO:0006874~cellular calcium ion homeostasis,GO:0006887~exocytosis,GO:0006935~chemotaxis,GO:0006954~inflammatory response,GO:0006955~immune response,GO:0007159~leukocyte cell-cell adhesion,GO:0007186~G-protein coupled re…
CCR5	C-C motif chemokine receptor 5 (gene/pseudogene)(CCR5)		GO:0000165~MAPK cascade,GO:0002407~dendritic cell chemotaxis,GO:0006816~calcium ion transport,GO:0006935~chemotaxis,GO:0006954~inflammatory response,GO:0006955~immune response,GO:0006968~cellular defense response,GO:0007166~cell surface receptor signaling pathway,GO:0007186~G-protein coupled receptor signaling pathway,GO:0007204~positive regulation of cytosolic calcium ion concentration,GO:000726…
CXCR3	C-X-C motif chemokine receptor 3(CXCR3)	GO:0010818~T cell chemotaxis,	GO:0001525~angiogenesis,GO:0001937~negative regulation of endothelial cell proliferation,GO:0002685~regulation of leukocyte migration,GO:0006915~apoptotic process,GO:0006928~movement of cell or subcellular component,GO:0006935~chemotaxis,GO:0006954~inflammatory response,GO:0007155~cell adhesion,GO:0007166~cell surface receptor signaling pathway,GO:0007186~G-protein coupled receptor signaling path…
CXCR6	C-X-C motif chemokine receptor 6(CXCR6)		GO:0006935~chemotaxis,GO:0006954~inflammatory response,GO:0007186~G-protein coupled receptor signaling pathway,GO:0019079~viral genome replication,GO:0070098~chemokine-mediated signaling pathway,
CD2	CD2 molecule(CD2)	GO:0042110~T cell activation	GO:0001766~membrane raft polarization,GO:0006915~apoptotic process,GO:0007155~cell adhesion,GO:0007166~cell surface receptor signaling pathway,GO:0016337~single organismal cell-cell adhesion,GO:0030101~natural killer cell activation,GO:0030887~positive regulation of myeloid dendritic cell activation,GO:0032760~positive regulation of tumor necrosis factor production,GO:0034113~heterotypic cell-cel…
CD247	CD247 molecule(CD247)	GO:0050852~T cell receptor signaling pathway	GO:0007166~cell surface receptor signaling pathway,GO:0016032~viral process,GO:0031295~T cell costimulation,GO:0038096~Fc-gamma receptor signaling pathway involved in phagocytosis,GO:0050690~regulation of defense response to virus by virus,GO:0050776~regulation of immune response,GO:0050852~T cell receptor signaling pathway,
CD27	CD27 molecule(CD27)	GO:0045582~positive regulation of T cell differentiation	GO:0006954~inflammatory response,GO:0006955~immune response,GO:0007166~cell surface receptor signaling pathway,GO:0007420~brain development,GO:0008588~release of cytoplasmic sequestered NF-kappaB,GO:0008625~extrinsic apoptotic signaling pathway via death domain receptors,GO:0016064~immunoglobulin mediated immune response,GO:0032496~response to lipopolysaccharide,GO:0033209~tumor necrosis factor-m…
CD3D	CD3d molecule(CD3D)	GO:0050852~T cell receptor signaling pathway	GO:0007166~cell surface receptor signaling pathway,GO:0030217~T cell differentiation,GO:0031295~T cell costimulation,GO:0045059~positive thymic T cell selection,GO:0045944~positive regulation of transcription from RNA polymerase II promoter,GO:0050776~regulation of immune response,GO:0050852~T cell receptor signaling pathway,
CD3E	CD3e molecule(CD3E)	GO:0050852~T cell receptor signaling pathway	GO:0002669~positive regulation of T cell anergy,GO:0006461~protein complex assembly,GO:0007166~cell surface receptor signaling pathway,GO:0007169~transmembrane receptor protein tyrosine kinase signaling pathway,GO:0007172~signal complex assembly,GO:0007186~G-protein coupled receptor signaling pathway,GO:0007584~response to nutrient,GO:0010628~positive regulation of gene expression,GO:0010629~nega…
CD3G	CD3g molecule(CD3G)	GO:0050852~T cell receptor signaling pathway	GO:0006461~protein complex assembly,GO:0007163~establishment or maintenance of cell polarity,GO:0007166~cell surface receptor signaling pathway,GO:0015031~protein transport,GO:0031295~T cell costimulation,GO:0038096~Fc-gamma receptor signaling pathway involved in phagocytosis,GO:0042110~T cell activation,GO:0050776~regulation of immune response,GO:0050852~T cell receptor signaling pathway,GO:0070…
CD48	CD48 molecule(CD48)	GO:0042110~T cell activation,	GO:0002819~regulation of adaptive immune response,GO:0006952~defense response,GO:0007165~signal transduction,GO:0042110~T cell activation,GO:0045576~mast cell activation,GO:0050900~leukocyte migration,
CD5	CD5 molecule(CD5)	GO:0031295~T cell costimulation	GO:0006898~receptor-mediated endocytosis,GO:0008037~cell recognition,GO:0008283~cell proliferation,GO:0031295~T cell costimulation,GO:0097190~apoptotic signaling pathway,
CD6	CD6 molecule(CD6)	GO:0042102~positive regulation of T cell proliferation	GO:0001771~immunological synapse formation,GO:0002250~adaptive immune response,GO:0002438~acute inflammatory response to antigenic stimulus,GO:0006898~receptor-mediated endocytosis,GO:0007157~heterophilic cell-cell adhesion via plasma membrane cell adhesion molecules,GO:0031663~lipopolysaccharide-mediated signaling pathway,GO:0032496~response to lipopolysaccharide,GO:0042102~positive regulation o…
CD7	CD7 molecule(CD7)	GO:0042110~T cell activation	GO:0002250~adaptive immune response,GO:0006955~immune response,GO:0007169~transmembrane receptor protein tyrosine kinase signaling pathway,GO:0042110~T cell activation,GO:0048873~homeostasis of number of cells within a tissue,
CD8A	CD8a molecule(CD8A)	GO:0042110~T cell activation,	GO:0002456~T cell mediated immunity,GO:0006955~immune response,GO:0007166~cell surface receptor signaling pathway,GO:0007169~transmembrane receptor protein tyrosine kinase signaling pathway,GO:0019882~antigen processing and presentation,GO:0042110~T cell activation,GO:0045065~cytotoxic T cell differentiation,GO:0050776~regulation of immune response,GO:0050850~positive regulation of calcium-mediat…
CD8B	CD8b molecule(CD8B)	GO:0042110~T cell activation,	GO:0002250~adaptive immune response,GO:0006955~immune response,GO:0007169~transmembrane receptor protein tyrosine kinase signaling pathway,GO:0042110~T cell activation,GO:0050690~regulation of defense response to virus by virus,GO:0050776~regulation of immune response,
CD96	CD96 molecule(CD96)		GO:0002534~cytokine production involved in inflammatory response,GO:0002728~negative regulation of natural killer cell cytokine production,GO:0006955~immune response,GO:0007155~cell adhesion,GO:0007160~cell-matrix adhesion,GO:0032496~response to lipopolysaccharide,GO:0032689~negative regulation of interferon-gamma production,GO:0050776~regulation of immune response,
FASLG	Fas ligand(FASLG)	GO:0070231~T cell apoptotic process,	GO:0000122~negative regulation of transcription from RNA polymerase II promoter,GO:0006351~transcription, DNA-templated,GO:0006915~apoptotic process,GO:0006919~activation of cysteine-type endopeptidase activity involved in apoptotic process,GO:0006925~inflammatory cell apoptotic process,GO:0006955~immune response,GO:0007165~signal transduction,GO:0007267~cell-cell signaling,GO:0008284~positive re…
GPR171	G protein-coupled receptor 171(GPR171)		GO:0007186~G-protein coupled receptor signaling pathway,GO:0035589~G-protein coupled purinergic nucleotide receptor signaling pathway,GO:0045638~negative regulation of myeloid cell differentiation,
GIMAP5	GTPase, IMAP family member 5(GIMAP5)
IKZF1	IKAROS family zinc finger 1(IKZF1)		GO:0000122~negative regulation of transcription from RNA polymerase II promoter,GO:0006351~transcription, DNA-templated,GO:0007049~cell cycle,GO:0007498~mesoderm development,GO:0016569~covalent chromatin modification,GO:0030098~lymphocyte differentiation,GO:0030218~erythrocyte differentiation,GO:0045892~negative regulation of transcription, DNA-templated,GO:0045944~positive regulation of transcri…
ITK	IL2 inducible T-cell kinase(ITK)	GO:0050852~T cell receptor signaling pathway	GO:0001816~cytokine production,GO:0001865~NK T cell differentiation,GO:0002250~adaptive immune response,GO:0006968~cellular defense response,GO:0007165~signal transduction,GO:0007169~transmembrane receptor protein tyrosine kinase signaling pathway,GO:0007202~activation of phospholipase C activity,GO:0032609~interferon-gamma production,GO:0032633~interleukin-4 production,GO:0035556~intracellular s…
LCK	LCK proto-oncogene, Src family tyrosine kinase(LCK)	GO:0050852~T cell receptor signaling pathway	GO:0006468~protein phosphorylation,GO:0006470~protein dephosphorylation,GO:0006882~cellular zinc ion homeostasis,GO:0006919~activation of cysteine-type endopeptidase activity involved in apoptotic process,GO:0007169~transmembrane receptor protein tyrosine kinase signaling pathway,GO:0014066~regulation of phosphatidylinositol 3-kinase signaling,GO:0016032~viral process,GO:0030097~hemopoiesis,GO:00…
RASAL3	RAS protein activator like 3(RASAL3)		GO:0000165~MAPK cascade,GO:0007165~signal transduction,GO:0043087~regulation of GTPase activity,GO:0043547~positive regulation of GTPase activity,GO:0046580~negative regulation of Ras protein signal transduction,GO:0051142~positive regulation of NK T cell proliferation,
ARHGAP9	Rho GTPase activating protein 9(ARHGAP9)		GO:0007165~signal transduction,GO:0043547~positive regulation of GTPase activity,GO:0051056~regulation of small GTPase mediated signal transduction,
SASH3	SAM and SH3 domain containing 3(SASH3)	GO:0042102~positive regulation of T cell proliferation	GO:0002639~positive regulation of immunoglobulin production,GO:0002726~positive regulation of T cell cytokine production,GO:0030890~positive regulation of B cell proliferation,GO:0032729~positive regulation of interferon-gamma production,GO:0032733~positive regulation of interleukin-10 production,GO:0032743~positive regulation of interleukin-2 production,GO:0032753~positive regulation of interleu…
SH2D1A	SH2 domain containing 1A(SH2D1A)		GO:0002250~adaptive immune response,GO:0006959~humoral immune response,GO:0006968~cellular defense response,GO:0007267~cell-cell signaling,GO:0009967~positive regulation of signal transduction,GO:0045087~innate immune response,GO:0045954~positive regulation of natural killer cell mediated cytotoxicity,GO:0050776~regulation of immune response,
SLAMF6	SLAM family member 6(SLAMF6)	GO:0072540~T-helper 17 cell lineage commitment	GO:0001779~natural killer cell differentiation,GO:0001787~natural killer cell proliferation,GO:0032729~positive regulation of interferon-gamma production,GO:0032740~positive regulation of interleukin-17 production,GO:0045087~innate immune response,GO:0045954~positive regulation of natural killer cell mediated cytotoxicity,GO:0050776~regulation of immune response,GO:0072540~T-helper 17 cell lineag…
SLA2	Src like adaptor 2(SLA2)	GO:0042110~T cell activation,	GO:0000122~negative regulation of transcription from RNA polymerase II promoter,GO:0009967~positive regulation of signal transduction,GO:0019724~B cell mediated immunity,GO:0030522~intracellular receptor signaling pathway,GO:0042110~T cell activation,GO:0050776~regulation of immune response,GO:0050849~negative regulation of calcium-mediated signaling,GO:0050851~antigen receptor-mediated signaling…
TRAT1	T cell receptor associated transmembrane adaptor 1(TRAT1)	GO:0050852~T cell receptor signaling pathway	GO:0001920~negative regulation of receptor recycling,GO:0002250~adaptive immune response,GO:0006968~cellular defense response,GO:0007165~signal transduction,GO:0007169~transmembrane receptor protein tyrosine kinase signaling pathway,GO:0014066~regulation of phosphatidylinositol 3-kinase signaling,GO:0046854~phosphatidylinositol phosphorylation,GO:0048015~phosphatidylinositol-mediated signaling,GO…
TBX21	T-box 21(TBX21)	GO:0030217~T cell differentiation	GO:0006351~transcription, DNA-templated,GO:0006355~regulation of transcription, DNA-templated,GO:0007275~multicellular organism development,GO:0009615~response to virus,GO:0030217~T cell differentiation,GO:0045893~positive regulation of transcription, DNA-templated,GO:0048304~positive regulation of isotype switching to IgG isotypes,GO:0071310~cellular response to organic substance,GO:0072676~lymp…
TIGIT	T-cell immunoreceptor with Ig and ITIM domains(TIGIT)	GO:0050868~negative regulation of T cell activation	GO:0007156~homophilic cell adhesion via plasma membrane adhesion molecules,GO:0007157~heterophilic cell-cell adhesion via plasma membrane cell adhesion molecules,GO:0008037~cell recognition,GO:0032695~negative regulation of interleukin-12 production,GO:0032733~positive regulation of interleukin-10 production,GO:0050868~negative regulation of T cell activation,
TBC1D10C	TBC1 domain family member 10C(TBC1D10C)		GO:0006886~intracellular protein transport,GO:0031338~regulation of vesicle fusion,GO:0042147~retrograde transport, endosome to Golgi,GO:0050869~negative regulation of B cell activation,GO:0051534~negative regulation of NFAT protein import into nucleus,GO:0070373~negative regulation of ERK1 and ERK2 cascade,GO:0090630~activation of GTPase activity,GO:1902017~regulation of cilium assembly,
TRAF3IP3	TRAF3 interacting protein 3(TRAF3IP3)
WAS	Wiskott-Aldrich syndrome(WAS)	GO:0050852~T cell receptor signaling pathway	GO:0002625~regulation of T cell antigen processing and presentation,GO:0006461~protein complex assembly,GO:0006952~defense response,GO:0006955~immune response,GO:0007015~actin filament organization,GO:0007596~blood coagulation,GO:0008154~actin polymerization or depolymerization,GO:0008544~epidermis development,GO:0016197~endosomal transport,GO:0030041~actin filament polymerization,GO:0030048~acti…
CORO1A	coronin 1A(CORO1A)	GO:0042102~positive regulation of T cell proliferation	GO:0001771~immunological synapse formation,GO:0001845~phagolysosome assembly,GO:0006816~calcium ion transport,GO:0006909~phagocytosis,GO:0006928~movement of cell or subcellular component,GO:0007015~actin filament organization,GO:0008360~regulation of cell shape,GO:0030036~actin cytoskeleton organization,GO:0030335~positive regulation of cell migration,GO:0030595~leukocyte chemotaxis,GO:0030833~re…
CST7	cystatin F(CST7)		GO:0006955~immune response,GO:2000117~negative regulation of cysteine-type endopeptidase activity,
CTLA4	cytotoxic T-lymphocyte associated protein 4(CTLA4)	GO:0031295~T cell costimulation	GO:0002250~adaptive immune response,GO:0006955~immune response,GO:0006974~cellular response to DNA damage stimulus,GO:0030889~negative regulation of B cell proliferation,GO:0031295~T cell costimulation,GO:0042130~negative regulation of T cell proliferation,GO:0043065~positive regulation of apoptotic process,GO:0045590~negative regulation of regulatory T cell differentiation,GO:0050777~negative re…
GZMA	granzyme A(GZMA)		GO:0006915~apoptotic process,GO:0006955~immune response,GO:0019835~cytolysis,GO:0032078~negative regulation of endodeoxyribonuclease activity,GO:0043065~positive regulation of apoptotic process,GO:0043392~negative regulation of DNA binding,GO:0051354~negative regulation of oxidoreductase activity,GO:0051603~proteolysis involved in cellular protein catabolic process,
GZMB	granzyme B(GZMB)		GO:0006915~apoptotic process,GO:0016485~protein processing,GO:0019835~cytolysis,GO:0042267~natural killer cell mediated cytotoxicity,GO:1900740~positive regulation of protein insertion into mitochondrial membrane involved in apoptotic signaling pathway,
GZMH	granzyme H(GZMH)		GO:0006915~apoptotic process,GO:0006955~immune response,GO:0016485~protein processing,GO:0019835~cytolysis,
GZMK	granzyme K(GZMK)		GO:0006508~proteolysis,
GZMM	granzyme M(GZMM)		GO:0006508~proteolysis,GO:0006915~apoptotic process,GO:0008219~cell death,GO:0019835~cytolysis,GO:0045087~innate immune response,
HCST	hematopoietic cell signal transducer(HCST)		GO:0006468~protein phosphorylation,GO:0014068~positive regulation of phosphatidylinositol 3-kinase signaling,GO:0050776~regulation of immune response,
ICOS	inducible T-cell costimulator(ICOS)	GO:0031295~T cell costimulation	GO:0002517~T cell tolerance induction,GO:0006955~immune response,GO:0016337~single organismal cell-cell adhesion,GO:0031295~T cell costimulation,
ITGAL	integrin subunit alpha L(ITGAL)	GO:0002291~T cell activation via T cell receptor contact with antigen bound to MHC molecule on antigen presenting cell	GO:0002291~T cell activation via T cell receptor contact with antigen bound to MHC molecule on antigen presenting cell,GO:0006909~phagocytosis,GO:0006928~movement of cell or subcellular component,GO:0006954~inflammatory response,GO:0007155~cell adhesion,GO:0007157~heterophilic cell-cell adhesion via plasma membrane cell adhesion molecules,GO:0007159~leukocyte cell-cell adhesion,GO:0007160~cell-ma…
IFNG	interferon gamma(IFNG)	GO:0050852~T cell receptor signaling pathway	GO:0000060~protein import into nucleus, translocation,GO:0000122~negative regulation of transcription from RNA polymerase II promoter,GO:0001781~neutrophil apoptotic process,GO:0002026~regulation of the force of heart contraction,GO:0002250~adaptive immune response,GO:0002302~CD8-positive, alpha-beta T cell differentiation involved in immune response,GO:0006915~apoptotic process,GO:0006928~moveme…
IL12RB1	interleukin 12 receptor subunit beta 1(IL12RB1)	GO:0042104~positive regulation of activated T cell proliferation,	GO:0001916~positive regulation of T cell mediated cytotoxicity,GO:0002230~positive regulation of defense response to virus by host,GO:0002827~positive regulation of T-helper 1 type immune response,GO:0007165~signal transduction,GO:0018108~peptidyl-tyrosine phosphorylation,GO:0019221~cytokine-mediated signaling pathway,GO:0032729~positive regulation of interferon-gamma production,GO:0035722~interl…
IL2RB	interleukin 2 receptor subunit beta(IL2RB)		GO:0000165~MAPK cascade,GO:0006461~protein complex assembly,GO:0007165~signal transduction,GO:0016032~viral process,GO:0019221~cytokine-mediated signaling pathway,GO:0038110~interleukin-2-mediated signaling pathway,GO:0043066~negative regulation of apoptotic process,GO:0043547~positive regulation of GTPase activity,
IL2RG	interleukin 2 receptor subunit gamma(IL2RG)		GO:0000165~MAPK cascade,GO:0006955~immune response,GO:0007165~signal transduction,GO:0016032~viral process,GO:0035771~interleukin-4-mediated signaling pathway,GO:0038110~interleukin-2-mediated signaling pathway,GO:0038111~interleukin-7-mediated signaling pathway,GO:0043547~positive regulation of GTPase activity,
IL21R	interleukin 21 receptor(IL21R)		GO:0030101~natural killer cell activation,GO:0038114~interleukin-21-mediated signaling pathway,
JAKMIP1	janus kinase and microtubule interacting protein 1(JAKMIP1)		GO:0015031~protein transport,GO:0050890~cognition,
KLRK1	killer cell lectin like receptor K1(KLRK1)	GO:0031295~T cell costimulation	GO:0002223~stimulatory C-type lectin receptor signaling pathway,GO:0002250~adaptive immune response,GO:0007165~signal transduction,GO:0030101~natural killer cell activation,GO:0030154~cell differentiation,GO:0031295~T cell costimulation,GO:0032729~positive regulation of interferon-gamma production,GO:0034260~negative regulation of GTPase activity,GO:0045087~innate immune response,GO:0045429~posit…
LAG3	lymphocyte activating 3(LAG3)	GO:0050868~negative regulation of T cell activation	GO:0007166~cell surface receptor signaling pathway,GO:0045085~negative regulation of interleukin-2 biosynthetic process,GO:0045954~positive regulation of natural killer cell mediated cytotoxicity,GO:0050868~negative regulation of T cell activation,
LTA	lymphotoxin alpha(LTA)		GO:0001666~response to hypoxia,GO:0002876~positive regulation of chronic inflammatory response to antigenic stimulus,GO:0002925~positive regulation of humoral immune response mediated by circulating immunoglobulin,GO:0006915~apoptotic process,GO:0006955~immune response,GO:0006959~humoral immune response,GO:0007165~signal transduction,GO:0007267~cell-cell signaling,GO:0007584~response to nutrient,…
MAP4K1	mitogen-activated protein kinase kinase kinase kinase 1(MAP4K1)		GO:0000185~activation of MAPKKK activity,GO:0006468~protein phosphorylation,GO:0006950~response to stress,GO:0007257~activation of JUN kinase activity,GO:0008283~cell proliferation,GO:0018105~peptidyl-serine phosphorylation,GO:0035556~intracellular signal transduction,GO:0046777~protein autophosphorylation,
NKG7	natural killer cell granule protein 7(NKG7)
PRF1	perforin 1(PRF1)		GO:0001771~immunological synapse formation,GO:0002357~defense response to tumor cell,GO:0002418~immune response to tumor cell,GO:0006915~apoptotic process,GO:0006968~cellular defense response,GO:0019835~cytolysis,GO:0051260~protein homooligomerization,GO:0051607~defense response to virus,GO:0055085~transmembrane transport,
PSTPIP1	proline-serine-threonine phosphatase interacting protein 1(PSTPIP1)		GO:0006897~endocytosis,GO:0006954~inflammatory response,GO:0007155~cell adhesion,GO:0007165~signal transduction,GO:0016477~cell migration,GO:0045087~innate immune response,
PTPN7	protein tyrosine phosphatase, non-receptor type 7(PTPN7)		GO:0006470~protein dephosphorylation,GO:0035335~peptidyl-tyrosine dephosphorylation,
PTPRCAP	protein tyrosine phosphatase, receptor type C associated protein(PTPRCAP)		GO:0006952~defense response,
P2RY10	purinergic receptor P2Y10(P2RY10)		GO:0035025~positive regulation of Rho protein signal transduction,GO:0035589~G-protein coupled purinergic nucleotide receptor signaling pathway,GO:0051482~positive regulation of cytosolic calcium ion concentration involved in phospholipase C-activating G-protein coupled signaling pathway,
PYHIN1	pyrin and HIN domain family member 1(PYHIN1)		GO:0007049~cell cycle,
SIRPG	signal regulatory protein gamma(SIRPG)	GO:0050870~positive regulation of T cell activation	GO:0007155~cell adhesion,GO:0007267~cell-cell signaling,GO:0008284~positive regulation of cell proliferation,GO:0008285~negative regulation of cell proliferation,GO:0022409~positive regulation of cell-cell adhesion,GO:0035556~intracellular signal transduction,GO:0050870~positive regulation of T cell activation,GO:0050900~leukocyte migration,
SLAMF1	signaling lymphocytic activation molecule family member 1(SLAMF1)	GO:0042104~positive regulation of activated T cell proliferation	GO:0001779~natural killer cell differentiation,GO:0001787~natural killer cell proliferation,GO:0002277~myeloid dendritic cell activation involved in immune response,GO:0002725~negative regulation of T cell cytokine production,GO:0006909~phagocytosis,GO:0007155~cell adhesion,GO:0007165~signal transduction,GO:0008284~positive regulation of cell proliferation,GO:0031338~regulation of vesicle fusion,…
SIT1	signaling threshold regulating transmembrane adaptor 1(SIT1)	GO:0050863~regulation of T cell activation	GO:0002250~adaptive immune response,GO:0007165~signal transduction,GO:0043029~T cell homeostasis,GO:0050863~regulation of T cell activation,
UBASH3A	ubiquitin associated and SH3 domain containing A(UBASH3A)	GO:0050860~negative regulation of T cell receptor signaling pathway,	GO:0001817~regulation of cytokine production,GO:0050860~negative regulation of T cell receptor signaling pathway,
ZAP70	zeta chain of T cell receptor associated protein kinase 70(ZAP70)	GO:0050852~T cell receptor signaling pathway	GO:0002250~adaptive immune response,GO:0002281~macrophage activation involved in immune response,GO:0002283~neutrophil activation involved in immune response,GO:0006468~protein phosphorylation,GO:0006954~inflammatory response,GO:0006955~immune response,GO:0007169~transmembrane receptor protein tyrosine kinase signaling pathway,GO:0018108~peptidyl-tyrosine phosphorylation,GO:0030217~T cell differe…
ZNF831	zinc finger protein 831(ZNF831)		GO:0006355~regulation of transcription, DNA-templated,GO:0006366~transcription from RNA polymerase II promoter,GO:0007165~signal transduction,GO:0007275~multicellular organism development,
SEPTIN1	septin-1

## Sheet: Exclusion2_Biocarta
After using GO Terms, used Biocarta terms for a secondary round of exclusion
ID	Gene Name	Basis for Exclusion	Biocarta	Biocarta
ACAP1	ArfGAP with coiled-coil, ankyrin repeat and PH domains 1(ACAP1)		0	0
CCR5	C-C motif chemokine receptor 5 (gene/pseudogene)(CCR5)	,h_il12Pathway:IL12 and Stat4 Dependent Signaling Pathway in Th1 Development	h_ccr5Pathway:Pertussis toxin-insensitive CCR5 Signaling in Macrophage,h_il12Pathway:IL12 and Stat4 Dependent Signaling Pathway in Th1 Development,h_nktPathway:Selective expression of chemokine receptors during T-cell polarization,h_no2il12Pathway:NO2-dependent IL 12 Pathway in NK cells,h_tcapoptosisPathway:HIV Induced T Cell Apoptosis,	h_ccr5Pathway:Pertussis toxin-insensitive CCR5 Signaling in Macrophage,h_il12Pathway:IL12 and Stat4 Dependent Signaling Pathway in Th1 Development,h_nktPathway:Selective expression of chemokine receptors during T-cell polarization,h_no2il12Pathway:NO2-dependent IL 12 Pathway in NK cells,h_tcapoptosisPathway:HIV Induced T Cell Apoptosis,
CXCR6	C-X-C motif chemokine receptor 6(CXCR6)		0	0
CD96	CD96 molecule(CD96)		0	0
GPR171	G protein-coupled receptor 171(GPR171)		0	0
GIMAP5	GTPase, IMAP family member 5(GIMAP5)		0	0
IKZF1	IKAROS family zinc finger 1(IKZF1)		0	0
RASAL3	RAS protein activator like 3(RASAL3)		0	0
ARHGAP9	Rho GTPase activating protein 9(ARHGAP9)		0	0
SH2D1A	SH2 domain containing 1A(SH2D1A)		0	0
TBC1D10C	TBC1 domain family member 10C(TBC1D10C)		0	0
TRAF3IP3	TRAF3 interacting protein 3(TRAF3IP3)		0	0
CST7	cystatin F(CST7)		0	0
GZMA	granzyme A(GZMA)		h_setPathway:Granzyme A mediated Apoptosis Pathway,	h_setPathway:Granzyme A mediated Apoptosis Pathway,
GZMB	granzyme B(GZMB)	,h_il12Pathway:IL12 and Stat4 Dependent Signaling Pathway in Th1 Development	h_caspasePathway:Caspase Cascade in Apoptosis,,h_il12Pathway:IL12 and Stat4 Dependent Signaling Pathway in Th1 Development,h_d4gdiPathway:D4-GDI Signaling Pathway,h_DNAfragmentPathway:Apoptotic DNA fragmentation and tissue homeostasis,h_setPathway:Granzyme A mediated Apoptosis Pathway,	h_caspasePathway:Caspase Cascade in Apoptosis,h_ctlPathway:CTL mediated immune response against target cells ,h_d4gdiPathway:D4-GDI Signaling Pathway,h_DNAfragmentPathway:Apoptotic DNA fragmentation and tissue homeostasis,h_setPathway:Granzyme A mediated Apoptosis Pathway,
GZMH	granzyme H(GZMH)		0	0
GZMK	granzyme K(GZMK)		0	0
GZMM	granzyme M(GZMM)		0	0
HCST	hematopoietic cell signal transducer(HCST)		0	0
IL2RB	interleukin 2 receptor subunit beta(IL2RB)	:IL-2 Receptor Beta Chain in T cell Activation,	h_il2Pathway:IL 2 signaling pathway,h_il2rbPathway:IL-2 Receptor Beta Chain in T cell Activation,	h_il2Pathway:IL 2 signaling pathway,h_il2rbPathway:IL-2 Receptor Beta Chain in T cell Activation,
IL2RG	interleukin 2 receptor subunit gamma(IL2RG)	IL-2 Receptor Beta Chain in T cell Activation	h_il2Pathway:IL 2 signaling pathway,h_il2rbPathway:IL-2 Receptor Beta Chain in T cell Activation,h_il4Pathway:IL 4 signaling pathway,h_il7Pathway:IL-7 Signal Transduction,	h_il2Pathway:IL 2 signaling pathway,h_il2rbPathway:IL-2 Receptor Beta Chain in T cell Activation,h_il4Pathway:IL 4 signaling pathway,h_il7Pathway:IL-7 Signal Transduction,
IL21R	interleukin 21 receptor(IL21R)		0	0
JAKMIP1	janus kinase and microtubule interacting protein 1(JAKMIP1)		0	0
LTA	lymphotoxin alpha(LTA)		h_cytokinePathway:Cytokine Network,h_inflamPathway:Cytokines and Inflammatory Response,h_stressPathway:TNF/Stress Related Signaling,h_tnfr2Pathway:TNFR2 Signaling Pathway,	h_cytokinePathway:Cytokine Network,h_inflamPathway:Cytokines and Inflammatory Response,h_stressPathway:TNF/Stress Related Signaling,h_tnfr2Pathway:TNFR2 Signaling Pathway,
MAP4K1	mitogen-activated protein kinase kinase kinase kinase 1(MAP4K1)		h_mapkPathway:MAPKinase Signaling Pathway,h_metPathway:Signaling of Hepatocyte Growth Factor Receptor,	h_mapkPathway:MAPKinase Signaling Pathway,h_metPathway:Signaling of Hepatocyte Growth Factor Receptor,
NKG7	natural killer cell granule protein 7(NKG7)		0	0
PRF1	perforin 1(PRF1)	,h_ctlPathway:CTL mediated immune response against target cells	h_caspasePathway:Caspase Cascade in Apoptosis,h_ctlPathway:CTL mediated immune response against target cells ,h_d4gdiPathway:D4-GDI Signaling Pathway,h_setPathway:Granzyme A mediated Apoptosis Pathway,	h_caspasePathway:Caspase Cascade in Apoptosis,h_ctlPathway:CTL mediated immune response against target cells ,h_d4gdiPathway:D4-GDI Signaling Pathway,h_setPathway:Granzyme A mediated Apoptosis Pathway,
PSTPIP1	proline-serine-threonine phosphatase interacting protein 1(PSTPIP1)		0	0
PTPN7	protein tyrosine phosphatase, non-receptor type 7(PTPN7)	h_tcrPathway:T Cell Receptor Signaling Pathway,	h_tcrPathway:T Cell Receptor Signaling Pathway,	h_tcrPathway:T Cell Receptor Signaling Pathway,
PTPRCAP	protein tyrosine phosphatase, receptor type C associated protein(PTPRCAP)		0	0
P2RY10	purinergic receptor P2Y10(P2RY10)		0	0
PYHIN1	pyrin and HIN domain family member 1(PYHIN1)		0	0
ZNF831	zinc finger protein 831(ZNF831)		0	0
SEPTIN1	septin-1		0	0

## Sheet: Finalists
ID	Gene Name
ACAP1	ArfGAP with coiled-coil, ankyrin repeat and PH domains 1(ACAP1)
ARHGAP9	Rho GTPase activating protein 9(ARHGAP9)
CD96	CD96 molecule(CD96)
CST7	cystatin F(CST7)
CXCR6	C-X-C motif chemokine receptor 6(CXCR6)
GIMAP5	GTPase, IMAP family member 5(GIMAP5)
GPR171	G protein-coupled receptor 171(GPR171)
GZMA	granzyme A(GZMA)
GZMH	granzyme H(GZMH)
GZMK	granzyme K(GZMK)
GZMM	granzyme M(GZMM)
HCST	hematopoietic cell signal transducer(HCST)
IKZF1	IKAROS family zinc finger 1(IKZF1)
IL21R	interleukin 21 receptor(IL21R)
JAKMIP1	janus kinase and microtubule interacting protein 1(JAKMIP1)
LTA	lymphotoxin alpha(LTA)
MAP4K1	mitogen-activated protein kinase kinase kinase kinase 1(MAP4K1)
NKG7	natural killer cell granule protein 7(NKG7)
P2RY10	purinergic receptor P2Y10(P2RY10)
PSTPIP1	proline-serine-threonine phosphatase interacting protein 1(PSTPIP1)
PTPRCAP	protein tyrosine phosphatase, receptor type C associated protein(PTPRCAP)
PYHIN1	pyrin and HIN domain family member 1(PYHIN1)
RASAL3	RAS protein activator like 3(RASAL3)
SEPTIN1	septin-1
SH2D1A	SH2 domain containing 1A(SH2D1A)
TBC1D10C	TBC1 domain family member 10C(TBC1D10C)
TRAF3IP3	TRAF3 interacting protein 3(TRAF3IP3)
ZNF831	zinc finger protein 831(ZNF831)
