# Supplementary material for: Molecular Mechanisms of PD-1 and PD-L1 Activity on a Pan-Cancer Basis: A Bioinformatic Exploratory Study
Source: Int J Mol Sci. 2021 May 22;22(11):5478. doi: 10.3390/ijms22115478 (PMC8196980; doi:10.3390/ijms22115478)
Supplement: Supplementary file 1 [file ijms-22-05478-s001.zip › File S4.xlsx]

## Sheet: CD274
mirDB							miRabel											Full List	Count	Count (Text)		Final miR List	Gene
Target Detail	Target Rank	Target Score	miRNA Name	Gene Symbol	Gene Description		Gene	miR	miRabel score	PITA	miRanda	SVMicrO	TargetScan	ExpVal	5'UTR	CDS		hsa-miR-105-5p	1	1		*no overlapping miRs for CD274*
Details	1	95	hsa-miR-3121-3p	CD274	CD274 molecule		CD274	hsa-miR-1273a	0.000900465	815	5	132	4	YES	NO	NO		hsa-miR-106a-5p	1	1
Details	2	93	hsa-miR-3117-3p	CD274	CD274 molecule		CD274	hsa-miR-324-5p	0.000978568	458	578	179	95	YES	NO	YES		hsa-miR-106b-5p	1	1
Details	3	93	hsa-miR-5692a	CD274	CD274 molecule		CD274	hsa-miR-650	0.00102353	577	132	1384	493	NO	NO	YES		hsa-miR-1205	1	1
Details	4	92	hsa-miR-320d	CD274	CD274 molecule		CD274	hsa-miR-28-3p	0.00109724	196	502	162	636	NO	NO	NO		hsa-miR-1233-3p	1	1
Details	5	92	hsa-miR-4429	CD274	CD274 molecule		CD274	hsa-miR-501-5p	0.00153757	251	453	143	394	NO	NO	NO		hsa-miR-1238-3p	1	1
Details	6	92	hsa-miR-320c	CD274	CD274 molecule		CD274	hsa-miR-1255b-5p	0.0016186	1249	514	53	644	NO	NO	NO		hsa-miR-1255a	1	1
Details	7	92	hsa-miR-320a-3p	CD274	CD274 molecule		CD274	hsa-miR-1205	0.00179794	1285	702	1310	118	NO	NO	NO		hsa-miR-1255b-5p	1	1
Details	8	92	hsa-miR-320b	CD274	CD274 molecule		CD274	hsa-miR-888-5p	0.00181747	1124	408	626	403	NO	NO	NO		hsa-miR-1256	1	1
Details	9	89	hsa-miR-7853-5p	CD274	CD274 molecule		CD274	hsa-miR-576-3p	0.00203069	1438	107	1451	50	NO	NO	NO		hsa-miR-1273a	1	1
Details	10	89	hsa-miR-105-5p	CD274	CD274 molecule		CD274	hsa-miR-662	0.00257492	342	1033	294	297	NO	NO	NO		hsa-miR-1298-5p	1	1
Details	11	87	hsa-miR-4477a	CD274	CD274 molecule		CD274	hsa-miR-1255a	0.00261364	1511	529	556	646	NO	NO	NO		hsa-miR-140-3p	1	1
Details	12	87	hsa-miR-106b-5p	CD274	CD274 molecule		CD274	hsa-miR-140-3p	0.0042636	1978	1029	964	796	NO	NO	NO		hsa-miR-152-3p	1	1
Details	13	87	hsa-miR-2115-5p	CD274	CD274 molecule		CD274	hsa-miR-1298-5p	0.0045428	1356	1499	334	349	NO	NO	YES		hsa-miR-17-5p	1	1
Details	14	87	hsa-miR-5193	CD274	CD274 molecule		CD274	hsa-miR-485-3p	0.00482371	622	342	841	1960	NO	NO	YES		hsa-miR-194-5p	1	1
Details	15	87	hsa-miR-526b-3p	CD274	CD274 molecule		CD274	hsa-miR-383-5p	0.00561073	3258	357	518	368	NO	NO	YES		hsa-miR-20a-5p	1	1
Details	16	87	hsa-miR-3145-3p	CD274	CD274 molecule		CD274	hsa-miR-339-5p	0.00585376	2490	148	1193	1283	NO	NO	NO		hsa-miR-20b-5p	1	1
Details	17	87	hsa-miR-20b-5p	CD274	CD274 molecule		CD274	hsa-miR-1256	0.00628564	1975	120	1729	953	NO	NO	YES		hsa-miR-2115-5p	1	1
Details	18	87	hsa-miR-106a-5p	CD274	CD274 molecule		CD274	hsa-miR-1233-3p	0.00733782	1159	2490	280	1264	NO	NO	NO		hsa-miR-28-3p	1	1
Details	19	87	hsa-miR-93-5p	CD274	CD274 molecule		CD274	hsa-miR-508-5p	0.0111389	1681	2626	57	535	NO	NO	NO		hsa-miR-302c-5p	1	1
Details	20	87	hsa-miR-17-5p	CD274	CD274 molecule		CD274	hsa-miR-520f-3p	0.0140362	2532	1822	1896	691	NO	NO	YES		hsa-miR-3117-3p	1	1
Details	21	87	hsa-miR-20a-5p	CD274	CD274 molecule		CD274	hsa-miR-384	0.0149622	3450	1125	616	1574	NO	NO	NO		hsa-miR-3121-3p	1	1
Details	22	87	hsa-miR-519d-3p	CD274	CD274 molecule		CD274	hsa-miR-1238-3p	0.016199	685	1123	3876	1707	NO	NO	NO		hsa-miR-3145-3p	1	1
Details	23	86	hsa-miR-4282	CD274	CD274 molecule		CD274	hsa-miR-513a-5p	0.0171091	4288	1853	432	1528	YES	NO	NO		hsa-miR-320a-3p	1	1
Details	24	86	hsa-miR-4279	CD274	CD274 molecule		CD274	hsa-miR-873-5p	0.0286584	2844	1593	1805	4716	NO	NO	NO		hsa-miR-320b	1	1
Details	25	86	hsa-miR-4443	CD274	CD274 molecule		CD274	hsa-miR-194-5p	0.0313293	3816	2152	569	1146	YES	NO	NO		hsa-miR-320c	1	1
Details	26	85	hsa-miR-302c-5p	CD274	CD274 molecule		CD274	hsa-miR-580-3p	0.0329926	6686	1784	405	1095	NO	NO	NO		hsa-miR-320d	1	1
Details	27	85	hsa-miR-4251	CD274	CD274 molecule		CD274	hsa-miR-152-3p	0.0331711	4344	2999	819	1081	YES	NO	NO		hsa-miR-324-5p	1	1
Details	28	84	hsa-miR-377-3p	CD274	CD274 molecule		CD274	hsa-miR-338-5p	0.0339917	4917	196	2990	160	YES	NO	NO		hsa-miR-338-5p	1	1
Details	29	84	hsa-miR-4694-3p	CD274	CD274 molecule		CD274	hsa-miR-556-5p	0.0499376	3215	3391	96	491	NO	NO	NO		hsa-miR-339-5p	1	1
Details	30	83	hsa-miR-6507-5p	CD274	CD274 molecule													hsa-miR-371b-5p	1	1
Details	31	82	hsa-miR-802	CD274	CD274 molecule													hsa-miR-373-5p	1	1
Details	32	81	hsa-miR-6752-3p	CD274	CD274 molecule													hsa-miR-377-3p	1	1
Details	33	81	hsa-miR-4506	CD274	CD274 molecule													hsa-miR-383-5p	1	1
Details	34	80	hsa-miR-373-5p	CD274	CD274 molecule													hsa-miR-384	1	1
Details	35	80	hsa-miR-616-5p	CD274	CD274 molecule													hsa-miR-4251	1	1
Details	36	80	hsa-miR-371b-5p	CD274	CD274 molecule													hsa-miR-4279	1	1
																		hsa-miR-4282	1	1
																		hsa-miR-4429	1	1
																		hsa-miR-4443	1	1
																		hsa-miR-4477a	1	1
																		hsa-miR-4506	1	1
																		hsa-miR-4694-3p	1	1
																		hsa-miR-485-3p	1	1
																		hsa-miR-501-5p	1	1
																		hsa-miR-508-5p	1	1
																		hsa-miR-513a-5p	1	1
																		hsa-miR-5193	1	1
																		hsa-miR-519d-3p	1	1
																		hsa-miR-520f-3p	1	1
																		hsa-miR-526b-3p	1	1
																		hsa-miR-556-5p	1	1
																		hsa-miR-5692a	1	1
																		hsa-miR-576-3p	1	1
																		hsa-miR-580-3p	1	1
																		hsa-miR-616-5p	1	1
																		hsa-miR-650	1	1
																		hsa-miR-6507-5p	1	1
																		hsa-miR-662	1	1
																		hsa-miR-6752-3p	1	1
																		hsa-miR-7853-5p	1	1
																		hsa-miR-802	1	1
																		hsa-miR-873-5p	1	1
																		hsa-miR-888-5p	1	1
																		hsa-miR-93-5p	1	1

## Sheet: PDCD1LG2
mirDB							miRabel											Full List	Count	Count (Text)		Final miR List	Gene
Target Detail	Target Rank	Target Score	miRNA Name	Gene Symbol	Gene Description		Gene	miR	miRabel score	PITA	miRanda	SVMicrO	TargetScan	ExpVal	5'UTR	CDS		hsa-miR-20a-5p	2	2		hsa-miR-20a-5p	PDCD1LG2
Details	1	99	hsa-miR-20a-5p	PDCD1LG2	programmed cell death 1 ligand 2		PDCD1LG2	hsa-miR-618	0.000439276	359	143	177	18	NO	NO	NO		hsa-miR-519d-3p	2	2		hsa-miR-519d-3p	PDCD1LG2
Details	2	99	hsa-miR-526b-3p	PDCD1LG2	programmed cell death 1 ligand 2		PDCD1LG2	hsa-miR-657	0.00058738	938	241	77	40	NO	NO	YES		hsa-miR-106b-5p	2	2		hsa-miR-106b-5p	PDCD1LG2
Details	3	99	hsa-miR-519d-3p	PDCD1LG2	programmed cell death 1 ligand 2		PDCD1LG2	hsa-miR-93-5p	0.000637304	391	904	331	49	NO	NO	NO		hsa-miR-20b-5p	2	2		hsa-miR-20b-5p	PDCD1LG2
Details	4	99	hsa-miR-106b-5p	PDCD1LG2	programmed cell death 1 ligand 2		PDCD1LG2	hsa-miR-106b-5p	0.000735053	527	842	282	58	NO	NO	NO		hsa-miR-17-5p	2	2		hsa-miR-17-5p	PDCD1LG2
Details	5	99	hsa-miR-20b-5p	PDCD1LG2	programmed cell death 1 ligand 2		PDCD1LG2	hsa-miR-20a-5p	0.000794818	603	914	249	62	NO	NO	NO		hsa-miR-93-5p	2	2		hsa-miR-93-5p	PDCD1LG2
Details	6	99	hsa-miR-17-5p	PDCD1LG2	programmed cell death 1 ligand 2		PDCD1LG2	hsa-miR-20b-5p	0.000873998	656	876	421	55	NO	NO	NO		hsa-miR-519c-3p	2	2		hsa-miR-519c-3p	PDCD1LG2
Details	7	99	hsa-miR-106a-5p	PDCD1LG2	programmed cell death 1 ligand 2		PDCD1LG2	hsa-miR-519d-3p	0.00116048	1855	805	23	69	NO	NO	NO		hsa-miR-519b-3p	2	2		hsa-miR-519b-3p	PDCD1LG2
Details	8	99	hsa-miR-93-5p	PDCD1LG2	programmed cell death 1 ligand 2		PDCD1LG2	hsa-miR-17-5p	0.00118604	1157	875	126	54	NO	NO	NO		hsa-miR-526b-3p	1	1
Details	9	98	hsa-miR-7-2-3p	PDCD1LG2	programmed cell death 1 ligand 2		PDCD1LG2	hsa-miR-372-3p	0.00134642	369	2064	218	184	NO	YES	NO		hsa-miR-106a-5p	1	1
Details	10	98	hsa-miR-7-1-3p	PDCD1LG2	programmed cell death 1 ligand 2		PDCD1LG2	hsa-miR-577	0.00134732	1056	701	1186	110	NO	NO	YES		hsa-miR-7-2-3p	1	1
Details	11	98	hsa-miR-3133	PDCD1LG2	programmed cell death 1 ligand 2		PDCD1LG2	hsa-miR-362-3p	0.00199482	476	560	1505	435	NO	NO	NO		hsa-miR-7-1-3p	1	1
Details	12	94	hsa-miR-943	PDCD1LG2	programmed cell death 1 ligand 2		PDCD1LG2	hsa-miR-520b	0.0021705	968	1996	441	288	NO	NO	NO		hsa-miR-3133	1	1
Details	13	89	hsa-miR-519c-3p	PDCD1LG2	programmed cell death 1 ligand 2		PDCD1LG2	hsa-miR-520d-3p	0.00220329	859	2067	529	314	NO	NO	NO		hsa-miR-943	1	1
Details	14	89	hsa-miR-519b-3p	PDCD1LG2	programmed cell death 1 ligand 2		PDCD1LG2	hsa-miR-519b-3p	0.00242579	1032	1237	520	558	NO	NO	NO		hsa-miR-519a-3p	1	1
Details	15	89	hsa-miR-519a-3p	PDCD1LG2	programmed cell death 1 ligand 2		PDCD1LG2	hsa-miR-519c-3p	0.00256539	1277	1369	247	555	NO	NO	NO		hsa-miR-3942-3p	1	1
Details	16	84	hsa-miR-3942-3p	PDCD1LG2	programmed cell death 1 ligand 2		PDCD1LG2	hsa-miR-520c-3p	0.00257721	1223	2052	474	288	NO	NO	NO		hsa-miR-29a-5p	1	1
Details	17	83	hsa-miR-29a-5p	PDCD1LG2	programmed cell death 1 ligand 2		PDCD1LG2	hsa-miR-520e	0.00271199	1498	2002	330	277	NO	NO	NO		hsa-miR-6734-5p	1	1
Details	18	81	hsa-miR-6734-5p	PDCD1LG2	programmed cell death 1 ligand 2		PDCD1LG2	hsa-miR-301a-3p	0.00279181	231	1262	1750	819	NO	NO	YES		hsa-miR-618	1	1
							PDCD1LG2	hsa-miR-520f-3p	0.00309198	1613	1817	732	97	NO	NO	NO		hsa-miR-657	1	1
							PDCD1LG2	hsa-miR-302e	0.00346871	1304	1653	1302	204	NO	NO	NO		hsa-miR-372-3p	1	1
							PDCD1LG2	hsa-miR-302d-3p	0.003698	980	2191	1387	215	NO	NO	NO		hsa-miR-577	1	1
							PDCD1LG2	hsa-miR-329-3p	0.00389375	1011	518	2042	478	NO	NO	NO		hsa-miR-362-3p	1	1
							PDCD1LG2	hsa-miR-302a-3p	0.00426672	1448	2190	1218	215	NO	NO	YES		hsa-miR-520b	1	1
							PDCD1LG2	hsa-miR-512-3p	0.00549479	895	1224	2902	504	NO	NO	YES		hsa-miR-520d-3p	1	1
							PDCD1LG2	hsa-miR-302c-3p	0.00566853	645	2203	2734	391	NO	NO	NO		hsa-miR-520c-3p	1	1
							PDCD1LG2	hsa-miR-1228-3p	0.00634928	2191	495	1695	464	NO	NO	NO		hsa-miR-520e	1	1
							PDCD1LG2	hsa-miR-622	0.00780609	4967	682	561	70	NO	NO	NO		hsa-miR-301a-3p	1	1
							PDCD1LG2	hsa-miR-1205	0.00818118	4466	1131	1331	232	NO	NO	YES		hsa-miR-520f-3p	1	1
							PDCD1LG2	hsa-miR-636	0.011155	1930	1175	2852	231	NO	NO	YES		hsa-miR-302e	1	1
							PDCD1LG2	hsa-miR-520a-5p	0.01123	448	3792	1933	1519	NO	NO	NO		hsa-miR-302d-3p	1	1
							PDCD1LG2	hsa-miR-302b-3p	0.0119651	2232	2224	2594	219	NO	NO	YES		hsa-miR-329-3p	1	1
							PDCD1LG2	hsa-miR-520a-3p	0.0123674	3424	1889	1526	358	NO	NO	YES		hsa-miR-302a-3p	1	1
							PDCD1LG2	hsa-miR-373-3p	0.0154449	2035	2188	3440	275	NO	NO	NO		hsa-miR-512-3p	1	1
							PDCD1LG2	hsa-miR-1252-5p	0.0172649	6449	2092	896	296	NO	NO	NO		hsa-miR-302c-3p	1	1
							PDCD1LG2	hsa-miR-19b-3p	0.0182904	4719	1428	264	812	NO	NO	NO		hsa-miR-1228-3p	1	1
							PDCD1LG2	hsa-miR-130a-3p	0.019396	2931	765	3192	629	NO	NO	NO		hsa-miR-622	1	1
							PDCD1LG2	hsa-miR-576-3p	0.02144	5581	1255	342	542	NO	NO	NO		hsa-miR-1205	1	1
							PDCD1LG2	hsa-miR-708-5p	0.0242714	5326	762	2390	373	NO	YES	NO		hsa-miR-636	1	1
							PDCD1LG2	hsa-miR-142-3p	0.0367203	2929	2343	518	1324	NO	YES	NO		hsa-miR-520a-5p	1	1
							PDCD1LG2	hsa-miR-28-5p	0.0391488	5565	679	3461	414	NO	NO	NO		hsa-miR-302b-3p	1	1
							PDCD1LG2	hsa-miR-578	0.0454238	6342	2137	2222	586	NO	NO	NO		hsa-miR-520a-3p	1	1
							PDCD1LG2	hsa-miR-377-3p	0.0469375	1583	3668	3884	533	NO	NO	NO		hsa-miR-373-3p	1	1
																		hsa-miR-1252-5p	1	1
																		hsa-miR-19b-3p	1	1
																		hsa-miR-130a-3p	1	1
																		hsa-miR-576-3p	1	1
																		hsa-miR-708-5p	1	1
																		hsa-miR-142-3p	1	1
																		hsa-miR-28-5p	1	1
																		hsa-miR-578	1	1
																		hsa-miR-377-3p	1	1

## Sheet: GBP5
mirDB							miRabel											Full List	Count	Count (Text)		Final List	Gene
Target Detail	Target Rank	Target Score	miRNA Name	Gene Symbol	Gene Description		Gene	miR	miRabel score	PITA	miRanda	SVMicrO	TargetScan	ExpVal	5'UTR	CDS		hsa-miR-584-5p	2	2		hsa-miR-584-5p	GBP5
Details	1	95	hsa-miR-335-3p	GBP5	guanylate binding protein 5		GBP5	hsa-miR-219a-5p	0.000473066	24	194	258	124	NO	NO	NO		hsa-miR-561-3p	2	2		hsa-miR-561-3p	GBP5
Details	2	94	hsa-miR-584-5p	GBP5	guanylate binding protein 5		GBP5	hsa-miR-142-5p	0.00314472	922	83	3384	132	NO	NO	NO		hsa-miR-340-5p	2	2		hsa-miR-340-5p	GBP5
Details	3	94	hsa-miR-4789-3p	GBP5	guanylate binding protein 5		GBP5	hsa-miR-561-3p	0.00394588	957	144	1993	2220	NO	NO	YES		hsa-miR-142-5p	2	2		hsa-miR-142-5p	GBP5
Details	4	94	hsa-miR-561-3p	GBP5	guanylate binding protein 5		GBP5	hsa-miR-508-3p	0.00498303	514	2435	256	599	NO	NO	YES		hsa-miR-335-3p	1	1
Details	5	92	hsa-miR-5190	GBP5	guanylate binding protein 5		GBP5	hsa-miR-340-5p	0.00540232	1610	58	847	3284	NO	NO	NO		hsa-miR-4789-3p	1	1
Details	6	92	hsa-miR-4509	GBP5	guanylate binding protein 5		GBP5	hsa-miR-548c-3p	0.0213769	1825	1922	6417	1143	NO	NO	NO		hsa-miR-5190	1	1
Details	7	92	hsa-miR-96-5p	GBP5	guanylate binding protein 5		GBP5	hsa-miR-186-5p	0.0248151	3234	1709	5284	1058	NO	NO	NO		hsa-miR-4509	1	1
Details	8	92	hsa-miR-340-5p	GBP5	guanylate binding protein 5		GBP5	hsa-miR-299-5p	0.0429374	2137	3693	1524	776	NO	NO	NO		hsa-miR-96-5p	1	1
Details	9	91	hsa-miR-1271-5p	GBP5	guanylate binding protein 5		GBP5	hsa-miR-584-5p	0.04577	-	109	49	43	NO	NO	YES		hsa-miR-1271-5p	1	1
Details	10	91	hsa-miR-12133	GBP5	guanylate binding protein 5		GBP5	hsa-miR-634	0.0493292	-	127	245	41	NO	NO	YES		hsa-miR-12133	1	1
Details	11	89	hsa-miR-216b-5p	GBP5	guanylate binding protein 5													hsa-miR-216b-5p	1	1
Details	12	88	hsa-miR-518a-5p	GBP5	guanylate binding protein 5													hsa-miR-518a-5p	1	1
Details	13	88	hsa-miR-527	GBP5	guanylate binding protein 5													hsa-miR-527	1	1
Details	14	85	hsa-miR-4504	GBP5	guanylate binding protein 5													hsa-miR-4504	1	1
Details	15	84	hsa-miR-29b-1-5p	GBP5	guanylate binding protein 5													hsa-miR-29b-1-5p	1	1
Details	16	84	hsa-miR-466	GBP5	guanylate binding protein 5													hsa-miR-466	1	1
Details	17	83	hsa-miR-5590-3p	GBP5	guanylate binding protein 5													hsa-miR-5590-3p	1	1
Details	18	83	hsa-miR-142-5p	GBP5	guanylate binding protein 5													hsa-miR-3156-5p	1	1
Details	19	82	hsa-miR-3156-5p	GBP5	guanylate binding protein 5													hsa-miR-4666a-3p	1	1
Details	20	82	hsa-miR-4666a-3p	GBP5	guanylate binding protein 5													hsa-miR-618	1	1
Details	21	80	hsa-miR-618	GBP5	guanylate binding protein 5													hsa-miR-219a-5p	1	1
																		hsa-miR-508-3p	1	1
																		hsa-miR-548c-3p	1	1
																		hsa-miR-186-5p	1	1
																		hsa-miR-299-5p	1	1
																		hsa-miR-634	1	1

## Sheet: CD80
mirDB							miRabel											Full List	Count	Count (Text)		Final List	Gene
Target Detail	Target Rank	Target Score	miRNA Name	Gene Symbol	Gene Description		Gene	miR	miRabel score	PITA	miRanda	SVMicrO	TargetScan	ExpVal	5'UTR	CDS		hsa-miR-146a-5p	2	2		hsa-miR-146a-5p	CD80
Details	1	97	hsa-miR-455-3p	CD80	CD80 molecule		CD80	hsa-miR-16-5p	0.000977361	952	690	25	737	NO	NO	NO		hsa-miR-146b-5p	2	2		hsa-miR-146b-5p	CD80
Details	2	93	hsa-miR-4694-3p	CD80	CD80 molecule		CD80	hsa-miR-15b-5p	0.00119905	1260	670	209	651	NO	NO	YES		hsa-miR-22-3p	2	2		hsa-miR-22-3p	CD80
Details	3	93	hsa-miR-3925-5p	CD80	CD80 molecule		CD80	hsa-miR-15a-5p	0.00125837	1502	692	29	650	NO	NO	YES		hsa-miR-15a-5p	2	2		hsa-miR-15a-5p	CD80
Details	4	90	hsa-miR-146a-5p	CD80	CD80 molecule		CD80	hsa-miR-219a-2-3p	0.00154607	312	1228	694	263	NO	NO	YES		hsa-miR-16-5p	2	2		hsa-miR-16-5p	CD80
Details	5	90	hsa-miR-146b-5p	CD80	CD80 molecule		CD80	hsa-miR-145-5p	0.00186514	527	687	114	285	NO	YES	NO		hsa-miR-15b-5p	2	2		hsa-miR-15b-5p	CD80
Details	6	90	hsa-miR-7153-5p	CD80	CD80 molecule		CD80	hsa-miR-1303	0.00194515	1130	690	1548	99	NO	NO	YES		hsa-miR-497-5p	2	2		hsa-miR-497-5p	CD80
Details	7	88	hsa-miR-22-3p	CD80	CD80 molecule		CD80	hsa-miR-146b-5p	0.00226565	2722	192	401	87	NO	NO	NO		hsa-miR-455-3p	1	1
Details	8	86	hsa-miR-3688-3p	CD80	CD80 molecule		CD80	hsa-miR-497-5p	0.00308887	2986	604	152	618	NO	NO	NO		hsa-miR-4694-3p	1	1
Details	9	85	hsa-miR-15a-5p	CD80	CD80 molecule		CD80	hsa-miR-22-3p	0.00363613	3060	321	761	81	NO	NO	YES		hsa-miR-3925-5p	1	1
Details	10	85	hsa-miR-195-5p	CD80	CD80 molecule		CD80	hsa-miR-146a-5p	0.00364759	2564	188	1419	97	YES	NO	NO		hsa-miR-7153-5p	1	1
Details	11	85	hsa-miR-6838-5p	CD80	CD80 molecule		CD80	hsa-miR-628-5p	0.00381614	3154	250	829	25	NO	NO	NO		hsa-miR-3688-3p	1	1
Details	12	85	hsa-miR-16-5p	CD80	CD80 molecule		CD80	hsa-miR-515-3p	0.0042625	1748	1512	228	389	NO	NO	YES		hsa-miR-195-5p	1	1
Details	13	85	hsa-miR-15b-5p	CD80	CD80 molecule		CD80	hsa-miR-141-3p	0.00464825	536	859	282	757	NO	NO	NO		hsa-miR-6838-5p	1	1
Details	14	85	hsa-miR-6124	CD80	CD80 molecule		CD80	hsa-miR-200a-3p	0.00481284	341	827	591	738	NO	NO	NO		hsa-miR-6124	1	1
Details	15	84	hsa-miR-497-5p	CD80	CD80 molecule		CD80	hsa-miR-630	0.00494603	1166	1360	234	1402	NO	NO	NO		hsa-miR-424-5p	1	1
Details	16	84	hsa-miR-424-5p	CD80	CD80 molecule		CD80	hsa-miR-1294	0.00529907	3275	915	696	448	NO	NO	YES		hsa-miR-6847-5p	1	1
Details	17	83	hsa-miR-6847-5p	CD80	CD80 molecule		CD80	hsa-miR-522-3p	0.00538092	201	3564	1225	654	NO	NO	NO		hsa-miR-9718	1	1
Details	18	83	hsa-miR-9718	CD80	CD80 molecule		CD80	hsa-miR-200b-3p	0.00592862	920	2530	538	1019	NO	NO	NO		hsa-miR-7977	1	1
Details	19	81	hsa-miR-7977	CD80	CD80 molecule		CD80	hsa-miR-29c-3p	0.00639972	1364	2478	128	855	NO	NO	YES		hsa-miR-219a-2-3p	1	1
							CD80	hsa-miR-29a-3p	0.00667379	1495	2384	117	856	NO	NO	YES		hsa-miR-145-5p	1	1
							CD80	hsa-miR-186-5p	0.00857134	4768	1400	1089	916	NO	NO	YES		hsa-miR-1303	1	1
							CD80	hsa-miR-511-5p	0.0113848	2797	263	446	1017	NO	NO	NO		hsa-miR-628-5p	1	1
							CD80	hsa-miR-29b-3p	0.0114696	2282	2701	116	858	NO	NO	YES		hsa-miR-515-3p	1	1
							CD80	hsa-miR-1206	0.011682	4388	808	788	248	NO	YES	NO		hsa-miR-141-3p	1	1
							CD80	hsa-miR-137	0.0122767	1295	1466	506	1426	NO	NO	NO		hsa-miR-200a-3p	1	1
							CD80	hsa-miR-30a-5p	0.0132141	897	1482	91	2796	NO	NO	NO		hsa-miR-630	1	1
							CD80	hsa-miR-539-5p	0.0146525	4462	1407	3088	414	NO	NO	NO		hsa-miR-1294	1	1
							CD80	hsa-miR-30c-5p	0.01562	1911	1639	68	2810	NO	NO	NO		hsa-miR-522-3p	1	1
							CD80	hsa-miR-580-3p	0.0157756	3997	1522	2043	1133	NO	NO	NO		hsa-miR-200b-3p	1	1
							CD80	hsa-miR-98-5p	0.016026	4809	1397	617	436	NO	NO	NO		hsa-miR-29c-3p	1	1
							CD80	hsa-miR-623	0.0165628	892	3662	3363	202	NO	NO	YES		hsa-miR-29a-3p	1	1
							CD80	hsa-miR-30e-5p	0.0179904	1514	1601	23	2820	NO	NO	NO		hsa-miR-186-5p	1	1
							CD80	hsa-miR-573	0.0207397	4086	328	1697	1196	NO	NO	NO		hsa-miR-511-5p	1	1
							CD80	hsa-miR-204-5p	0.0235974	4578	3071	465	901	NO	NO	NO		hsa-miR-29b-3p	1	1
							CD80	hsa-miR-30d-5p	0.0269187	2419	1416	60	2789	NO	NO	NO		hsa-miR-1206	1	1
							CD80	hsa-miR-30b-5p	0.0275693	2281	1516	23	2808	NO	NO	NO		hsa-miR-137	1	1
							CD80	hsa-miR-921	0.0299215	3016	1396	2427	616	NO	NO	YES		hsa-miR-30a-5p	1	1
							CD80	hsa-miR-555	0.030297	1533	2480	1473	816	NO	YES	NO		hsa-miR-539-5p	1	1
							CD80	hsa-miR-548l	0.0316925	2627	4209	1805	1547	NO	NO	YES		hsa-miR-30c-5p	1	1
							CD80	hsa-miR-149-5p	0.0341369	6226	2196	1196	1096	NO	NO	YES		hsa-miR-580-3p	1	1
							CD80	hsa-miR-1276	0.0406832	5243	1080	3265	1570	NO	NO	NO		hsa-miR-98-5p	1	1
							CD80	hsa-miR-382-5p	0.0478131	3828	3607	362	1725	NO	NO	YES		hsa-miR-623	1	1
							CD80	hsa-miR-1269a	0.0489712	3520	3226	827	901	NO	NO	YES		hsa-miR-30e-5p	1	1
																		hsa-miR-573	1	1
																		hsa-miR-204-5p	1	1
																		hsa-miR-30d-5p	1	1
																		hsa-miR-30b-5p	1	1
																		hsa-miR-921	1	1
																		hsa-miR-555	1	1
																		hsa-miR-548l	1	1
																		hsa-miR-149-5p	1	1
																		hsa-miR-1276	1	1
																		hsa-miR-382-5p	1	1
																		hsa-miR-1269a	1	1

## Sheet: GBP1
mirDB							miRabel											Full List	Count	Count (Text)		Final List	Gene
Target Detail	Target Rank	Target Score	miRNA Name	Gene Symbol	Gene Description		Gene	miR	miRabel score	PITA	miRanda	SVMicrO	TargetScan	ExpVal	5'UTR	CDS		hsa-miR-302f	2	2		hsa-miR-302f	GBP1
Details	1	96	hsa-miR-4799-5p	GBP1	guanylate binding protein 1		GBP1	hsa-miR-302f	0.000508726	161	71	256	322	NO	NO	NO		hsa-miR-377-3p	2	2		hsa-miR-377-3p	GBP1
Details	2	96	hsa-miR-302f	GBP1	guanylate binding protein 1		GBP1	hsa-miR-532-5p	0.000548079	353	583	104	30	NO	NO	NO		hsa-miR-1297	2	2		hsa-miR-1297	GBP1
Details	3	92	hsa-miR-3659	GBP1	guanylate binding protein 1		GBP1	hsa-miR-1322	0.00118961	212	66	1712	10	NO	NO	YES		hsa-miR-543	2	2		hsa-miR-543	GBP1
Details	4	89	hsa-miR-6782-5p	GBP1	guanylate binding protein 1		GBP1	hsa-miR-934	0.00186495	347	698	302	643	NO	YES	NO		hsa-miR-4799-5p	1	1
Details	5	89	hsa-miR-5692a	GBP1	guanylate binding protein 1		GBP1	hsa-miR-384	0.00224762	1726	527	322	848	NO	NO	NO		hsa-miR-3659	1	1
Details	6	88	hsa-miR-377-3p	GBP1	guanylate binding protein 1		GBP1	hsa-miR-543	0.00269025	2093	50	1173	678	NO	NO	YES		hsa-miR-6782-5p	1	1
Details	7	88	hsa-miR-335-5p	GBP1	guanylate binding protein 1		GBP1	hsa-miR-323b-5p	0.00302067	1885	400	346	468	NO	NO	NO		hsa-miR-5692a	1	1
Details	8	87	hsa-miR-513b-3p	GBP1	guanylate binding protein 1		GBP1	hsa-miR-377-3p	0.00331107	388	282	2409	1016	NO	NO	NO		hsa-miR-335-5p	1	1
Details	9	86	hsa-miR-205-3p	GBP1	guanylate binding protein 1		GBP1	hsa-miR-1302	0.00522116	3104	301	556	1019	NO	NO	NO		hsa-miR-513b-3p	1	1
Details	10	83	hsa-miR-944	GBP1	guanylate binding protein 1		GBP1	hsa-miR-1200	0.00647202	2488	158	904	2559	NO	NO	NO		hsa-miR-205-3p	1	1
Details	11	82	hsa-miR-3658	GBP1	guanylate binding protein 1		GBP1	hsa-miR-494-3p	0.00909655	1665	1408	2687	1658	NO	NO	NO		hsa-miR-944	1	1
Details	12	81	hsa-miR-30a-3p	GBP1	guanylate binding protein 1		GBP1	hsa-miR-219a-1-3p	0.0102581	4235	279	176	952	NO	NO	NO		hsa-miR-3658	1	1
Details	13	81	hsa-miR-30e-3p	GBP1	guanylate binding protein 1		GBP1	hsa-miR-1272	0.0104265	1131	3153	1118	261	NO	NO	YES		hsa-miR-30a-3p	1	1
Details	14	81	hsa-miR-30d-3p	GBP1	guanylate binding protein 1		GBP1	hsa-miR-571	0.0113476	1173	2598	537	1670	NO	NO	NO		hsa-miR-30e-3p	1	1
Details	15	81	hsa-miR-1297	GBP1	guanylate binding protein 1		GBP1	hsa-miR-1297	0.0116819	1456	395	841	4060	NO	NO	NO		hsa-miR-30d-3p	1	1
Details	16	80	hsa-miR-543	GBP1	guanylate binding protein 1		GBP1	hsa-miR-21-5p	0.0125571	1729	317	439	1087	NO	NO	NO		hsa-miR-532-5p	1	1
							GBP1	hsa-miR-1825	0.0135292	674	1907	2692	1552	NO	NO	YES		hsa-miR-1322	1	1
							GBP1	hsa-miR-137	0.0136313	2535	1272	263	1741	NO	NO	NO		hsa-miR-934	1	1
							GBP1	hsa-miR-26a-5p	0.0184825	2020	496	1307	4062	NO	NO	NO		hsa-miR-384	1	1
							GBP1	hsa-miR-34c-3p	0.0195525	1854	2153	1539	1030	NO	NO	NO		hsa-miR-323b-5p	1	1
							GBP1	hsa-miR-140-3p	0.0217823	2697	4075	1129	1295	NO	NO	NO		hsa-miR-1302	1	1
							GBP1	hsa-miR-26b-5p	0.023096	2925	559	894	4062	NO	NO	NO		hsa-miR-1200	1	1
							GBP1	hsa-miR-1299	0.0396401	1940	2661	4173	2893	NO	NO	NO		hsa-miR-494-3p	1	1
							GBP1	hsa-miR-876-3p	0.0486272	4685	385	3400	1670	NO	NO	NO		hsa-miR-219a-1-3p	1	1
																		hsa-miR-1272	1	1
																		hsa-miR-571	1	1
																		hsa-miR-21-5p	1	1
																		hsa-miR-1825	1	1
																		hsa-miR-137	1	1
																		hsa-miR-26a-5p	1	1
																		hsa-miR-34c-3p	1	1
																		hsa-miR-140-3p	1	1
																		hsa-miR-26b-5p	1	1
																		hsa-miR-1299	1	1
																		hsa-miR-876-3p	1	1

## Sheet: JAK2
mirDB							miRabel											Full List	Count	Count (Text)		Final List	Gene
Target Detail	Target Rank	Target Score	miRNA Name	Gene Symbol	Gene Description		Gene	miR	miRabel score	PITA	miRanda	SVMicrO	TargetScan	ExpVal	5'UTR	CDS		hsa-miR-1284	2	2		hsa-miR-1284	JAK2
Details	1	100	hsa-miR-8485	JAK2	Janus kinase 2		JAK2	hsa-miR-380-3p	0.000586237	3	292	779	106	NO	NO	NO		hsa-miR-337-3p	2	2		hsa-miR-337-3p	JAK2
Details	2	99	hsa-miR-3148	JAK2	Janus kinase 2		JAK2	hsa-miR-135b-5p	0.000780586	786	95	553	231	NO	YES	NO		hsa-miR-380-3p	2	2		hsa-miR-380-3p	JAK2
Details	3	98	hsa-miR-373-5p	JAK2	Janus kinase 2		JAK2	hsa-miR-9-5p	0.00101136	10	19	1094	1263	NO	NO	YES		hsa-miR-568	2	2		hsa-miR-568	JAK2
Details	4	98	hsa-miR-616-5p	JAK2	Janus kinase 2		JAK2	hsa-miR-1284	0.00109282	776	354	72	435	NO	NO	NO		hsa-miR-219a-1-3p	2	2		hsa-miR-219a-1-3p	JAK2
Details	5	98	hsa-miR-371b-5p	JAK2	Janus kinase 2		JAK2	hsa-miR-135a-5p	0.00121855	1499	100	559	232	YES	YES	NO		hsa-miR-216a-5p	2	2		hsa-miR-216a-5p	JAK2
Details	6	94	hsa-miR-6843-3p	JAK2	Janus kinase 2		JAK2	hsa-miR-511-5p	0.00152619	823	1000	913	671	NO	YES	NO		hsa-miR-211-5p	2	2		hsa-miR-211-5p	JAK2
Details	7	94	hsa-miR-6848-3p	JAK2	Janus kinase 2		JAK2	hsa-miR-620	0.00183968	2620	88	474	331	NO	NO	NO		hsa-miR-204-5p	2	2		hsa-miR-204-5p	JAK2
Details	8	94	hsa-miR-1284	JAK2	Janus kinase 2		JAK2	hsa-miR-556-5p	0.00254924	2137	272	247	400	NO	NO	NO		hsa-miR-135b-5p	2	2		hsa-miR-135b-5p	JAK2
Details	9	93	hsa-miR-3163	JAK2	Janus kinase 2		JAK2	hsa-miR-216a-5p	0.00304032	2222	30	1190	388	YES	NO	YES		hsa-miR-135a-5p	2	2		hsa-miR-135a-5p	JAK2
Details	10	93	hsa-miR-337-3p	JAK2	Janus kinase 2		JAK2	hsa-miR-633	0.00328658	178	1186	1475	687	NO	NO	NO		hsa-miR-8485	1	1
Details	11	92	hsa-miR-380-3p	JAK2	Janus kinase 2		JAK2	hsa-miR-219a-1-3p	0.00341366	2056	157	1192	325	NO	NO	NO		hsa-miR-3148	1	1
Details	12	92	hsa-miR-1468-3p	JAK2	Janus kinase 2		JAK2	hsa-miR-1197	0.00358352	1229	182	2881	273	NO	NO	YES		hsa-miR-373-5p	1	1
Details	13	92	hsa-miR-568	JAK2	Janus kinase 2		JAK2	hsa-miR-1226-3p	0.00383147	656	594	2461	730	NO	NO	YES		hsa-miR-616-5p	1	1
Details	14	92	hsa-miR-219a-1-3p	JAK2	Janus kinase 2		JAK2	hsa-miR-204-5p	0.00397185	3404	89	1220	194	YES	NO	NO		hsa-miR-371b-5p	1	1
Details	15	92	hsa-miR-548aw	JAK2	Janus kinase 2		JAK2	hsa-miR-1244	0.00397352	680	2126	294	992	NO	NO	YES		hsa-miR-6843-3p	1	1
Details	16	91	hsa-miR-216a-5p	JAK2	Janus kinase 2		JAK2	hsa-miR-320d	0.00406965	124	667	2962	1105	NO	NO	YES		hsa-miR-6848-3p	1	1
Details	17	91	hsa-miR-211-5p	JAK2	Janus kinase 2		JAK2	hsa-miR-337-3p	0.00455027	1252	335	1351	716	NO	NO	NO		hsa-miR-3163	1	1
Details	18	91	hsa-miR-642b-5p	JAK2	Janus kinase 2		JAK2	hsa-miR-513a-3p	0.0047535	790	2980	574	1912	NO	NO	NO		hsa-miR-1468-3p	1	1
Details	19	91	hsa-miR-4698	JAK2	Janus kinase 2		JAK2	hsa-miR-211-5p	0.0049347	3434	86	1604	208	NO	NO	NO		hsa-miR-548aw	1	1
Details	20	91	hsa-miR-204-5p	JAK2	Janus kinase 2		JAK2	hsa-miR-320a	0.00503059	102	689	3463	1106	NO	NO	NO		hsa-miR-642b-5p	1	1
Details	21	91	hsa-miR-3688-3p	JAK2	Janus kinase 2		JAK2	hsa-miR-320c	0.00525709	40	673	3587	1105	NO	NO	NO		hsa-miR-4698	1	1
Details	22	90	hsa-miR-4755-5p	JAK2	Janus kinase 2		JAK2	hsa-miR-320b	0.00540253	111	689	3601	1115	NO	NO	NO		hsa-miR-3688-3p	1	1
Details	23	90	hsa-miR-548x-3p	JAK2	Janus kinase 2		JAK2	hsa-miR-624-3p	0.00565364	2776	1205	133	1277	NO	NO	YES		hsa-miR-4755-5p	1	1
Details	24	90	hsa-miR-548aj-3p	JAK2	Janus kinase 2		JAK2	hsa-miR-571	0.00591235	403	2249	819	1295	NO	NO	NO		hsa-miR-548x-3p	1	1
Details	25	90	hsa-miR-5006-3p	JAK2	Janus kinase 2		JAK2	hsa-miR-381-3p	0.0072028	1010	1145	1651	2060	NO	NO	NO		hsa-miR-548aj-3p	1	1
Details	26	89	hsa-miR-548ae-3p	JAK2	Janus kinase 2		JAK2	hsa-miR-1270	0.00774538	5507	92	621	434	NO	YES	NO		hsa-miR-5006-3p	1	1
Details	27	89	hsa-miR-548aq-3p	JAK2	Janus kinase 2		JAK2	hsa-miR-181b-5p	0.00957699	1855	1401	467	2954	NO	YES	NO		hsa-miR-548ae-3p	1	1
Details	28	89	hsa-miR-548ah-3p	JAK2	Janus kinase 2		JAK2	hsa-miR-600	0.00975921	368	2740	1496	1027	NO	NO	NO		hsa-miR-548aq-3p	1	1
Details	29	89	hsa-miR-548j-3p	JAK2	Janus kinase 2		JAK2	hsa-miR-502-5p	0.0104032	130	318	3140	3104	NO	NO	YES		hsa-miR-548ah-3p	1	1
Details	30	89	hsa-miR-548am-3p	JAK2	Janus kinase 2		JAK2	hsa-miR-568	0.0105165	1280	859	2642	1307	YES	NO	NO		hsa-miR-548j-3p	1	1
Details	31	88	hsa-let-7a-3p	JAK2	Janus kinase 2		JAK2	hsa-miR-371a-5p	0.0105707	2503	1933	1064	1863	NO	NO	YES		hsa-miR-548am-3p	1	1
Details	32	88	hsa-miR-548ao-5p	JAK2	Janus kinase 2		JAK2	hsa-miR-375	0.010598	1944	682	475	1471	YES	NO	NO		hsa-let-7a-3p	1	1
Details	33	88	hsa-miR-548ax	JAK2	Janus kinase 2		JAK2	hsa-miR-374a-5p	0.0112788	736	944	2058	2837	NO	NO	NO		hsa-miR-548ao-5p	1	1
Details	34	86	hsa-miR-197-3p	JAK2	Janus kinase 2		JAK2	hsa-miR-133b	0.0122371	88	1512	2666	1345	NO	YES	NO		hsa-miR-548ax	1	1
Details	35	86	hsa-miR-4468	JAK2	Janus kinase 2		JAK2	hsa-miR-369-3p	0.0124697	1579	921	167	3365	NO	NO	NO		hsa-miR-197-3p	1	1
Details	36	84	hsa-miR-98-3p	JAK2	Janus kinase 2		JAK2	hsa-miR-500a-5p	0.0127811	314	1552	1522	2965	NO	NO	YES		hsa-miR-4468	1	1
Details	37	84	hsa-let-7b-3p	JAK2	Janus kinase 2		JAK2	hsa-miR-181d-5p	0.0133277	2169	1559	774	2929	NO	YES	NO		hsa-miR-98-3p	1	1
Details	38	84	hsa-let-7f-1-3p	JAK2	Janus kinase 2		JAK2	hsa-miR-570-3p	0.0134189	5360	1435	505	1500	NO	NO	NO		hsa-let-7b-3p	1	1
Details	39	83	hsa-miR-605-5p	JAK2	Janus kinase 2		JAK2	hsa-miR-370-3p	0.0140443	1563	249	4781	945	NO	NO	NO		hsa-let-7f-1-3p	1	1
Details	40	83	hsa-miR-8060	JAK2	Janus kinase 2		JAK2	hsa-miR-133a-3p	0.0144445	123	1512	2635	2021	NO	YES	NO		hsa-miR-605-5p	1	1
Details	41	82	hsa-miR-135b-5p	JAK2	Janus kinase 2		JAK2	hsa-miR-181a-5p	0.0148975	1955	1295	1225	2962	NO	NO	NO		hsa-miR-8060	1	1
Details	42	82	hsa-miR-135a-5p	JAK2	Janus kinase 2		JAK2	hsa-miR-892b	0.0153786	1540	1950	2365	427	NO	NO	NO		hsa-miR-4282	1	1
Details	43	81	hsa-miR-4282	JAK2	Janus kinase 2		JAK2	hsa-miR-384	0.0154092	408	2478	2630	1542	NO	NO	NO		hsa-miR-888-3p	1	1
Details	44	80	hsa-miR-888-3p	JAK2	Janus kinase 2		JAK2	hsa-miR-216b-5p	0.0170893	2840	853	2360	884	NO	NO	YES		hsa-miR-9-5p	1	1
							JAK2	hsa-miR-649	0.0179173	861	2280	2091	879	NO	NO	NO		hsa-miR-511-5p	1	1
							JAK2	hsa-miR-1206	0.0187263	1152	432	2989	2583	NO	NO	NO		hsa-miR-620	1	1
							JAK2	hsa-miR-548m	0.0191304	2665	1765	1421	2853	NO	NO	NO		hsa-miR-556-5p	1	1
							JAK2	hsa-miR-362-5p	0.0203607	2601	585	2116	1905	NO	NO	NO		hsa-miR-633	1	1
							JAK2	hsa-miR-922	0.0208386	1202	3365	4436	1161	NO	YES	NO		hsa-miR-1197	1	1
							JAK2	hsa-miR-142-5p	0.021152	1625	1501	2154	3836	NO	NO	NO		hsa-miR-1226-3p	1	1
							JAK2	hsa-miR-374b-5p	0.0217237	2180	784	1843	3075	NO	NO	NO		hsa-miR-1244	1	1
							JAK2	hsa-miR-548l	0.0251763	4676	1844	1905	1247	NO	NO	NO		hsa-miR-320d	1	1
							JAK2	hsa-miR-621	0.0256824	2450	191	2604	313	NO	NO	YES		hsa-miR-513a-3p	1	1
							JAK2	hsa-miR-1256	0.0276243	3397	1635	839	1365	NO	NO	YES		hsa-miR-320a	1	1
							JAK2	hsa-miR-490-3p	0.0278052	2181	1655	2173	1192	NO	NO	YES		hsa-miR-320c	1	1
							JAK2	hsa-miR-579-3p	0.0285008	4856	2620	9	1291	NO	NO	YES		hsa-miR-320b	1	1
							JAK2	hsa-miR-140-3p	0.0285454	1455	2846	3028	2372	NO	NO	YES		hsa-miR-624-3p	1	1
							JAK2	hsa-miR-34c-5p	0.038059	853	3694	3974	1257	NO	NO	YES		hsa-miR-571	1	1
							JAK2	hsa-miR-582-5p	0.0405762	2559	3023	2662	1252	NO	NO	NO		hsa-miR-381-3p	1	1
							JAK2	hsa-miR-410-3p	0.0409656	1855	3603	575	3587	NO	NO	NO		hsa-miR-1270	1	1
							JAK2	hsa-miR-623	0.0431756	2095	1662	3560	3090	NO	YES	NO		hsa-miR-181b-5p	1	1
							JAK2	hsa-miR-193a-3p	0.0433514	3100	1251	2818	876	NO	NO	NO		hsa-miR-600	1	1
							JAK2	hsa-miR-452-5p	0.0483885	1396	3804	1999	2740	NO	NO	YES		hsa-miR-502-5p	1	1
																		hsa-miR-371a-5p	1	1
																		hsa-miR-375	1	1
																		hsa-miR-374a-5p	1	1
																		hsa-miR-133b	1	1
																		hsa-miR-369-3p	1	1
																		hsa-miR-500a-5p	1	1
																		hsa-miR-181d-5p	1	1
																		hsa-miR-570-3p	1	1
																		hsa-miR-370-3p	1	1
																		hsa-miR-133a-3p	1	1
																		hsa-miR-181a-5p	1	1
																		hsa-miR-892b	1	1
																		hsa-miR-384	1	1
																		hsa-miR-216b-5p	1	1
																		hsa-miR-649	1	1
																		hsa-miR-1206	1	1
																		hsa-miR-548m	1	1
																		hsa-miR-362-5p	1	1
																		hsa-miR-922	1	1
																		hsa-miR-142-5p	1	1
																		hsa-miR-374b-5p	1	1
																		hsa-miR-548l	1	1
																		hsa-miR-621	1	1
																		hsa-miR-1256	1	1
																		hsa-miR-490-3p	1	1
																		hsa-miR-579-3p	1	1
																		hsa-miR-140-3p	1	1
																		hsa-miR-34c-5p	1	1
																		hsa-miR-582-5p	1	1
																		hsa-miR-410-3p	1	1
																		hsa-miR-623	1	1
																		hsa-miR-193a-3p	1	1
																		hsa-miR-452-5p	1	1

## Sheet: SAMD9L
mirDB							miRabel											Full List	Count	Count (Text)		Final List	Gene
Target Detail	Target Rank	Target Score	miRNA Name	Gene Symbol	Gene Description		Gene	miR	miRabel score	PITA	miRanda	SVMicrO	TargetScan	ExpVal	5'UTR	CDS		hsa-miR-552-3p	2	2		hsa-miR-552-3p	SAMD9L
Details	1	100	hsa-miR-6867-5p	SAMD9L	sterile alpha motif domain containing 9 like		SAMD9L	hsa-miR-450b-3p	0.000578867	410	364	132	320	NO	NO	YES		hsa-miR-580-3p	2	2		hsa-miR-580-3p	SAMD9L
Details	2	94	hsa-miR-552-3p	SAMD9L	sterile alpha motif domain containing 9 like		SAMD9L	hsa-miR-552-3p	0.000736552	178	215	229	1092	NO	NO	YES		hsa-miR-513a-5p	2	2		hsa-miR-513a-5p	SAMD9L
Details	3	94	hsa-miR-548e-5p	SAMD9L	sterile alpha motif domain containing 9 like		SAMD9L	hsa-miR-185-5p	0.000739932	59	442	867	693	NO	NO	YES		hsa-miR-128-3p	2	2		hsa-miR-128-3p	SAMD9L
Details	4	91	hsa-miR-3148	SAMD9L	sterile alpha motif domain containing 9 like		SAMD9L	hsa-miR-574-5p	0.000762493	7	926	167	395	YES	NO	NO		hsa-miR-6867-5p	1	1
Details	5	89	hsa-miR-10527-5p	SAMD9L	sterile alpha motif domain containing 9 like		SAMD9L	hsa-miR-513a-5p	0.00112108	1054	302	757	522	NO	NO	YES		hsa-miR-548e-5p	1	1
Details	6	88	hsa-miR-580-3p	SAMD9L	sterile alpha motif domain containing 9 like		SAMD9L	hsa-miR-627-5p	0.00115662	519	126	148	1237	NO	NO	YES		hsa-miR-3148	1	1
Details	7	87	hsa-miR-513a-5p	SAMD9L	sterile alpha motif domain containing 9 like		SAMD9L	hsa-miR-1257	0.00128455	139	268	1464	332	NO	NO	YES		hsa-miR-10527-5p	1	1
Details	8	85	hsa-miR-8081	SAMD9L	sterile alpha motif domain containing 9 like		SAMD9L	hsa-miR-1292-5p	0.00138373	286	894	434	490	NO	YES	NO		hsa-miR-8081	1	1
Details	9	83	hsa-miR-3688-3p	SAMD9L	sterile alpha motif domain containing 9 like		SAMD9L	hsa-miR-617	0.0014161	49	718	1188	333	NO	NO	NO		hsa-miR-3688-3p	1	1
Details	10	83	hsa-miR-10397-5p	SAMD9L	sterile alpha motif domain containing 9 like		SAMD9L	hsa-miR-128-3p	0.00167048	1334	107	1250	547	NO	NO	YES		hsa-miR-10397-5p	1	1
Details	11	82	hsa-miR-5584-3p	SAMD9L	sterile alpha motif domain containing 9 like		SAMD9L	hsa-miR-620	0.0016777	451	1116	253	1570	NO	NO	NO		hsa-miR-5584-3p	1	1
Details	12	81	hsa-miR-128-3p	SAMD9L	sterile alpha motif domain containing 9 like		SAMD9L	hsa-miR-181b-5p	0.00256048	760	351	1921	858	NO	NO	YES		hsa-miR-216a-3p	1	1
Details	13	81	hsa-miR-216a-3p	SAMD9L	sterile alpha motif domain containing 9 like		SAMD9L	hsa-miR-556-3p	0.00276642	535	892	799	692	NO	NO	NO		hsa-miR-135a-5p	1	1
Details	14	81	hsa-miR-135a-5p	SAMD9L	sterile alpha motif domain containing 9 like		SAMD9L	hsa-miR-181d-5p	0.00281711	1369	417	1420	856	NO	NO	YES		hsa-miR-135b-5p	1	1
Details	15	81	hsa-miR-135b-5p	SAMD9L	sterile alpha motif domain containing 9 like		SAMD9L	hsa-miR-181a-5p	0.00307575	842	315	2101	847	NO	NO	YES		hsa-miR-450b-3p	1	1
							SAMD9L	hsa-miR-580-3p	0.00388043	171	1352	92	1445	NO	NO	NO		hsa-miR-185-5p	1	1
							SAMD9L	hsa-miR-323a-5p	0.0040282	3282	146	827	135	NO	NO	YES		hsa-miR-574-5p	1	1
							SAMD9L	hsa-miR-7-5p	0.00465767	2642	1038	952	1193	NO	NO	NO		hsa-miR-627-5p	1	1
							SAMD9L	hsa-miR-924	0.00473387	433	593	2203	807	NO	NO	YES		hsa-miR-1257	1	1
							SAMD9L	hsa-miR-20b-5p	0.00524028	1559	1312	1796	1344	YES	NO	YES		hsa-miR-1292-5p	1	1
							SAMD9L	hsa-miR-299-3p	0.00534123	37	3748	108	1081	NO	NO	NO		hsa-miR-617	1	1
							SAMD9L	hsa-miR-181c-5p	0.00630069	2115	302	2086	909	NO	NO	NO		hsa-miR-620	1	1
							SAMD9L	hsa-miR-93-5p	0.00650929	935	1232	2821	1510	YES	NO	YES		hsa-miR-181b-5p	1	1
							SAMD9L	hsa-miR-1270	0.00689083	225	1228	3375	1648	NO	NO	YES		hsa-miR-556-3p	1	1
							SAMD9L	hsa-miR-519d-3p	0.00699526	104	1117	4210	1124	YES	NO	YES		hsa-miR-181d-5p	1	1
							SAMD9L	hsa-miR-514a-3p	0.0071243	969	637	2738	431	NO	NO	YES		hsa-miR-181a-5p	1	1
							SAMD9L	hsa-miR-409-3p	0.00762511	3186	517	1839	440	NO	NO	YES		hsa-miR-323a-5p	1	1
							SAMD9L	hsa-miR-106b-5p	0.00766994	1328	1168	3161	1216	YES	NO	YES		hsa-miR-7-5p	1	1
							SAMD9L	hsa-miR-146a-5p	0.00886357	1618	3720	181	534	YES	NO	YES		hsa-miR-924	1	1
							SAMD9L	hsa-miR-20a-5p	0.00888087	1687	1285	3041	1228	YES	NO	NO		hsa-miR-20b-5p	1	1
							SAMD9L	hsa-miR-877-5p	0.00939143	2176	264	3231	595	NO	NO	YES		hsa-miR-299-3p	1	1
							SAMD9L	hsa-miR-27a-3p	0.00940091	1520	1306	2104	2376	NO	NO	NO		hsa-miR-181c-5p	1	1
							SAMD9L	hsa-miR-1321	0.0107406	397	669	5287	1818	NO	NO	YES		hsa-miR-93-5p	1	1
							SAMD9L	hsa-miR-506-3p	0.0115395	532	4003	1202	1934	NO	NO	YES		hsa-miR-1270	1	1
							SAMD9L	hsa-miR-1298-5p	0.0119899	1459	1191	2083	772	NO	NO	YES		hsa-miR-519d-3p	1	1
							SAMD9L	hsa-miR-638	0.0123341	89	800	3970	232	NO	NO	YES		hsa-miR-514a-3p	1	1
							SAMD9L	hsa-miR-876-3p	0.0123953	2532	1884	849	1073	NO	NO	NO		hsa-miR-409-3p	1	1
							SAMD9L	hsa-miR-548p	0.012434	2412	2173	2339	1422	NO	NO	NO		hsa-miR-106b-5p	1	1
							SAMD9L	hsa-miR-583	0.0127817	1006	1262	4004	2083	NO	YES	NO		hsa-miR-146a-5p	1	1
							SAMD9L	hsa-miR-216a-5p	0.0137603	314	1869	2327	2321	NO	NO	YES		hsa-miR-20a-5p	1	1
							SAMD9L	hsa-miR-626	0.0144664	1354	2061	2015	1011	NO	NO	NO		hsa-miR-877-5p	1	1
							SAMD9L	hsa-miR-146b-5p	0.0155044	1955	4433	218	608	NO	NO	YES		hsa-miR-27a-3p	1	1
							SAMD9L	hsa-miR-671-5p	0.0159084	894	970	5065	1102	NO	NO	YES		hsa-miR-1321	1	1
							SAMD9L	hsa-miR-27b-3p	0.0162737	1549	1334	3403	2383	NO	NO	NO		hsa-miR-506-3p	1	1
							SAMD9L	hsa-miR-874-3p	0.0173286	736	1774	3738	887	NO	YES	NO		hsa-miR-1298-5p	1	1
							SAMD9L	hsa-miR-1227-3p	0.0226157	1295	2209	1876	1505	NO	NO	YES		hsa-miR-638	1	1
							SAMD9L	hsa-miR-624-3p	0.0236455	1041	5496	1422	725	NO	NO	NO		hsa-miR-876-3p	1	1
							SAMD9L	hsa-miR-942-5p	0.0416323	5120	3700	704	2345	NO	NO	YES		hsa-miR-548p	1	1
							SAMD9L	hsa-miR-1253	0.0457077	376	4549	4041	1370	NO	NO	YES		hsa-miR-583	1	1
							SAMD9L	hsa-miR-629-5p	0.0462996	4884	2716	867	2117	NO	NO	YES		hsa-miR-216a-5p	1	1
																		hsa-miR-626	1	1
																		hsa-miR-146b-5p	1	1
																		hsa-miR-671-5p	1	1
																		hsa-miR-27b-3p	1	1
																		hsa-miR-874-3p	1	1
																		hsa-miR-1227-3p	1	1
																		hsa-miR-624-3p	1	1
																		hsa-miR-942-5p	1	1
																		hsa-miR-1253	1	1
																		hsa-miR-629-5p	1	1

## Sheet: LCP2
mirDB							miRabel											Full List	Count	Count (Text)		Final List	Gene
Target Detail	Target Rank	Target Score	miRNA Name	Gene Symbol	Gene Description		Gene	miR	miRabel score	PITA	miRanda	SVMicrO	TargetScan	ExpVal	5'UTR	CDS		hsa-miR-579-3p	2	2		hsa-miR-579-3p	LCP2
Details	1	99	hsa-miR-5692a	LCP2	lymphocyte cytosolic protein 2		LCP2	hsa-miR-365a-3p	0.000563356	50	233	330	239	NO	NO	YES		hsa-miR-452-5p	2	2		hsa-miR-452-5p	LCP2
Details	2	93	hsa-miR-1910-5p	LCP2	lymphocyte cytosolic protein 2		LCP2	hsa-miR-361-3p	0.000811064	185	63	1096	338	NO	NO	NO		hsa-miR-5692a	1	1
Details	3	91	hsa-miR-10522-5p	LCP2	lymphocyte cytosolic protein 2		LCP2	hsa-miR-581	0.00103748	57	859	151	951	NO	NO	NO		hsa-miR-1910-5p	1	1
Details	4	91	hsa-miR-548as-3p	LCP2	lymphocyte cytosolic protein 2		LCP2	hsa-miR-452-5p	0.00162373	1627	690	186	463	NO	NO	YES		hsa-miR-10522-5p	1	1
Details	5	90	hsa-miR-4666a-5p	LCP2	lymphocyte cytosolic protein 2		LCP2	hsa-miR-137	0.00195998	594	588	763	761	NO	NO	NO		hsa-miR-548as-3p	1	1
Details	6	88	hsa-miR-5699-5p	LCP2	lymphocyte cytosolic protein 2		LCP2	hsa-miR-542-3p	0.00434386	1471	2293	273	660	NO	NO	NO		hsa-miR-4666a-5p	1	1
Details	7	87	hsa-miR-664b-3p	LCP2	lymphocyte cytosolic protein 2		LCP2	hsa-miR-148a-3p	0.00438524	7	348	3652	746	NO	NO	NO		hsa-miR-5699-5p	1	1
Details	8	87	hsa-miR-4513	LCP2	lymphocyte cytosolic protein 2		LCP2	hsa-miR-579-3p	0.00608478	2842	406	369	2912	NO	NO	NO		hsa-miR-664b-3p	1	1
Details	9	87	hsa-miR-6855-3p	LCP2	lymphocyte cytosolic protein 2		LCP2	hsa-miR-203a	0.00654123	2782	497	823	2369	NO	NO	YES		hsa-miR-4513	1	1
Details	10	87	hsa-miR-579-3p	LCP2	lymphocyte cytosolic protein 2		LCP2	hsa-miR-203a-3p	0.00654123	2782	497	823	2369	NO	NO	YES		hsa-miR-6855-3p	1	1
Details	11	86	hsa-miR-3185	LCP2	lymphocyte cytosolic protein 2		LCP2	hsa-miR-1206	0.00823773	1504	955	1337	1774	NO	NO	NO		hsa-miR-3185	1	1
Details	12	85	hsa-miR-4328	LCP2	lymphocyte cytosolic protein 2		LCP2	hsa-miR-182-5p	0.0082729	864	2314	459	2551	NO	NO	NO		hsa-miR-4328	1	1
Details	13	85	hsa-miR-5582-3p	LCP2	lymphocyte cytosolic protein 2		LCP2	hsa-miR-511-5p	0.00953767	1507	437	2715	2648	NO	NO	YES		hsa-miR-5582-3p	1	1
Details	14	83	hsa-miR-548ar-3p	LCP2	lymphocyte cytosolic protein 2		LCP2	hsa-miR-200a-3p	0.0115732	1939	219	3083	763	NO	NO	YES		hsa-miR-548ar-3p	1	1
Details	15	83	hsa-miR-5586-3p	LCP2	lymphocyte cytosolic protein 2		LCP2	hsa-miR-1245a	0.0126961	1770	1118	2321	803	NO	NO	NO		hsa-miR-5586-3p	1	1
Details	16	83	hsa-miR-137-3p	LCP2	lymphocyte cytosolic protein 2		LCP2	hsa-miR-127-5p	0.0165561	1498	889	3489	1453	NO	NO	YES		hsa-miR-137-3p	1	1
Details	17	82	hsa-miR-452-5p	LCP2	lymphocyte cytosolic protein 2		LCP2	hsa-miR-1305	0.0219761	319	3177	4146	1730	NO	NO	NO		hsa-miR-365a-3p	1	1
							LCP2	hsa-miR-28-3p	0.0293665	1616	2113	1677	973	NO	NO	YES		hsa-miR-361-3p	1	1
							LCP2	hsa-miR-556-3p	0.0436669	2390	2620	246	1978	NO	NO	NO		hsa-miR-581	1	1
																		hsa-miR-137	1	1
																		hsa-miR-542-3p	1	1
																		hsa-miR-148a-3p	1	1
																		hsa-miR-203a	1	1
																		hsa-miR-203a-3p	1	1
																		hsa-miR-1206	1	1
																		hsa-miR-182-5p	1	1
																		hsa-miR-511-5p	1	1
																		hsa-miR-200a-3p	1	1
																		hsa-miR-1245a	1	1
																		hsa-miR-127-5p	1	1
																		hsa-miR-1305	1	1
																		hsa-miR-28-3p	1	1
																		hsa-miR-556-3p	1	1

## Sheet: CCR5
mirDB							miRabel											Full List	Count	Count (Text)		Final List	Gene
Target Detail	Target Rank	Target Score	miRNA Name	Gene Symbol	Gene Description		Gene	miR	miRabel score	PITA	miRanda	SVMicrO	TargetScan	ExpVal	5'UTR	CDS			0			*no overlapping miRs for CCR5*
Details	1	92	hsa-miR-320a-5p	CCR5	C-C motif chemokine receptor 5 (gene/pseudogene)		No miRs <= 0.05
Details	2	92	hsa-miR-3179	CCR5	C-C motif chemokine receptor 5 (gene/pseudogene)
Details	3	91	hsa-miR-498-5p	CCR5	C-C motif chemokine receptor 5 (gene/pseudogene)
Details	4	87	hsa-miR-670-5p	CCR5	C-C motif chemokine receptor 5 (gene/pseudogene)
Details	5	85	hsa-miR-5193	CCR5	C-C motif chemokine receptor 5 (gene/pseudogene)
Details	6	85	hsa-miR-1202	CCR5	C-C motif chemokine receptor 5 (gene/pseudogene)
Details	7	85	hsa-miR-3972	CCR5	C-C motif chemokine receptor 5 (gene/pseudogene)
Details	8	83	hsa-miR-27a-5p	CCR5	C-C motif chemokine receptor 5 (gene/pseudogene)
Details	9	82	hsa-miR-4319	CCR5	C-C motif chemokine receptor 5 (gene/pseudogene)

## Sheet: GATD3A
mirDB							miRabel											Full List	Count	Count (Text)		Final List	Gene
Target Detail	Target Rank	Target Score	miRNA Name	Gene Symbol	Gene Description		Gene	miR	miRabel score	PITA	miRanda	SVMicrO	TargetScan	ExpVal	5'UTR	CDS		hsa-miR-4704-3p	1	1		*no overlapping miRs for GATD3A*
Details	1	94	hsa-miR-4704-3p	GATD3A	glutamine amidotransferase like class 1 domain containing 3A		GATD3A	hsa-miR-215-5p	0.0048683	238	1983	753	1109	NO	NO	NO		hsa-miR-604	1	1
Details	2	87	hsa-miR-604	GATD3A	glutamine amidotransferase like class 1 domain containing 3A		GATD3A	hsa-miR-192-5p	0.00526941	7	1983	1244	1026	NO	NO	NO		hsa-miR-761	1	1
Details	3	86	hsa-miR-761	GATD3A	glutamine amidotransferase like class 1 domain containing 3A		GATD3A	hsa-miR-1251-5p	0.00578183	246	928	1952	1355	NO	NO	NO		hsa-miR-3619-5p	1	1
Details	4	86	hsa-miR-3619-5p	GATD3A	glutamine amidotransferase like class 1 domain containing 3A		GATD3A	hsa-miR-370-3p	0.00624571	189	2531	865	496	NO	NO	NO		hsa-miR-6894-3p	1	1
Details	5	83	hsa-miR-6894-3p	GATD3A	glutamine amidotransferase like class 1 domain containing 3A		GATD3A	hsa-miR-1184	0.00785767	234	4092	826	2107	NO	NO	NO		hsa-miR-214-3p	1	1
Details	6	83	hsa-miR-214-3p	GATD3A	glutamine amidotransferase like class 1 domain containing 3A		GATD3A	hsa-miR-1234-3p	0.0111469	391	2194	456	1917	YES	NO	NO		hsa-miR-3913-5p	1	1
Details	7	82	hsa-miR-3913-5p	GATD3A	glutamine amidotransferase like class 1 domain containing 3A		GATD3A	hsa-miR-1282	0.0118329	178	1733	657	277	NO	NO	NO		hsa-miR-12122	1	1
Details	8	81	hsa-miR-12122	GATD3A	glutamine amidotransferase like class 1 domain containing 3A		GATD3A	hsa-miR-223-3p	0.0135049	1206	2136	2347	450	NO	NO	NO		hsa-miR-215-5p	1	1
							GATD3A	hsa-miR-509-3-5p	0.0149028	901	5026	217	1943	NO	NO	NO		hsa-miR-192-5p	1	1
							GATD3A	hsa-miR-890	0.0151207	1080	5541	232	547	NO	NO	NO		hsa-miR-1251-5p	1	1
							GATD3A	hsa-miR-193a-5p	0.0161726	1028	2890	542	2981	NO	NO	NO		hsa-miR-370-3p	1	1
							GATD3A	hsa-miR-512-5p	0.0167962	1719	5074	210	838	NO	NO	NO		hsa-miR-1184	1	1
							GATD3A	hsa-miR-935	0.0170338	663	3347	1945	791	NO	NO	NO		hsa-miR-1234-3p	1	1
							GATD3A	hsa-miR-1237-3p	0.0184081	669	3581	4102	685	NO	NO	NO		hsa-miR-1282	1	1
							GATD3A	hsa-miR-1250-5p	0.0203323	792	1919	69	665	NO	NO	NO		hsa-miR-223-3p	1	1
							GATD3A	hsa-miR-1266-5p	0.0207581	3343	5101	946	461	NO	NO	NO		hsa-miR-509-3-5p	1	1
							GATD3A	hsa-miR-513a-5p	0.0221257	808	3121	4270	1124	NO	NO	NO		hsa-miR-890	1	1
							GATD3A	hsa-miR-139-3p	0.0252794	250	1926	1612	1501	NO	NO	NO		hsa-miR-193a-5p	1	1
							GATD3A	hsa-miR-876-5p	0.0258308	2294	3202	2613	464	NO	NO	NO		hsa-miR-512-5p	1	1
							GATD3A	hsa-miR-22-3p	0.0292293	915	3793	2630	1360	NO	NO	NO		hsa-miR-935	1	1
							GATD3A	hsa-miR-145-5p	0.0297519	575	3604	3647	1393	NO	NO	NO		hsa-miR-1237-3p	1	1
							GATD3A	hsa-miR-1205	0.0318402	2274	5225	975	2680	NO	NO	NO		hsa-miR-1250-5p	1	1
							GATD3A	hsa-miR-509-5p	0.0327609	1643	5067	649	1919	NO	NO	NO		hsa-miR-1266-5p	1	1
							GATD3A	hsa-miR-518e-3p	0.0342952	1502	906	1046	342	NO	NO	NO		hsa-miR-513a-5p	1	1
							GATD3A	hsa-miR-323b-5p	0.0345643	611	2228	2379	1895	NO	NO	NO		hsa-miR-139-3p	1	1
							GATD3A	hsa-miR-1200	0.0364019	1893	3528	2199	398	NO	NO	NO		hsa-miR-876-5p	1	1
							GATD3A	hsa-miR-1286	0.0364716	4182	2795	3343	315	NO	NO	NO		hsa-miR-22-3p	1	1
							GATD3A	hsa-miR-708-5p	0.0366298	1449	4424	3025	1226	NO	NO	NO		hsa-miR-145-5p	1	1
							GATD3A	hsa-miR-1254	0.0378271	979	6261	3221	1459	NO	NO	NO		hsa-miR-1205	1	1
							GATD3A	hsa-miR-296-5p	0.0381905	319	3049	2164	2203	NO	NO	NO		hsa-miR-509-5p	1	1
							GATD3A	hsa-miR-510-5p	0.0383577	2571	2577	144	1388	NO	NO	NO		hsa-miR-518e-3p	1	1
							GATD3A	hsa-miR-27a-3p	0.0390874	2290	3800	3910	959	NO	NO	NO		hsa-miR-323b-5p	1	1
							GATD3A	hsa-miR-149-5p	0.0402865	1660	2752	3150	3564	NO	NO	NO		hsa-miR-1200	1	1
							GATD3A	hsa-miR-188-3p	0.0405155	1147	6344	473	731	NO	NO	NO		hsa-miR-1286	1	1
							GATD3A	hsa-miR-1294	0.0427197	1327	6639	812	1481	NO	NO	NO		hsa-miR-708-5p	1	1
							GATD3A	hsa-miR-9-5p	0.0428852	174	3881	3199	3892	YES	NO	NO		hsa-miR-1254	1	1
							GATD3A	hsa-miR-146b-5p	0.0448443	434	4951	2873	1289	NO	NO	NO		hsa-miR-296-5p	1	1
							GATD3A	hsa-miR-631	0.0471177	4	2717	2476	2888	NO	NO	NO		hsa-miR-510-5p	1	1
							GATD3A	hsa-miR-542-3p	0.0490302	391	4625	2814	1291	NO	NO	NO		hsa-miR-27a-3p	1	1
							GATD3A	hsa-miR-544a	0.0490739	2389	4050	2913	2322	NO	NO	NO		hsa-miR-149-5p	1	1
							GATD3A	hsa-miR-423-3p	0.0492134	2032	2371	151	435	NO	NO	NO		hsa-miR-188-3p	1	1
																		hsa-miR-1294	1	1
																		hsa-miR-9-5p	1	1
																		hsa-miR-146b-5p	1	1
																		hsa-miR-631	1	1
																		hsa-miR-542-3p	1	1
																		hsa-miR-544a	1	1
																		hsa-miR-423-3p	1	1

[truncated: 35 more sheets: COX19, DNASE1, DUS1L, PDCD1, ACAP1, ARHGAP9, CD96, CST7, CXCR6, GIMAP5, GPR171, GZMA, GZMH, GZMK, GZMM, HCST, IKZF1, IL21R, JAKMIP1, LTA …]
