# Supplementary material for: Molecular Mechanisms of PD-1 and PD-L1 Activity on a Pan-Cancer Basis: A Bioinformatic Exploratory Study
Source: Int J Mol Sci. 2021 May 22;22(11):5478. doi: 10.3390/ijms22115478 (PMC8196980; doi:10.3390/ijms22115478)
Supplement: Supplementary file 1 [file ijms-22-05478-s001.zip › File S5.xlsx]

## Sheet: Starting miR List
hsa-miR-142-5p
hsa-miR-340-5p
hsa-miR-106b-5p
hsa-miR-128-3p
hsa-miR-1284
hsa-miR-1297
hsa-miR-1323
hsa-miR-135a-5p
hsa-miR-135b-5p
hsa-miR-146a-5p
hsa-miR-146b-5p
hsa-miR-15a-5p
hsa-miR-15b-5p
hsa-miR-16-5p
hsa-miR-17-5p
hsa-miR-19b-3p
hsa-miR-204-5p
hsa-miR-20a-5p
hsa-miR-20b-5p
hsa-miR-211-5p
hsa-miR-216a-5p
hsa-miR-218-5p
hsa-miR-219a-1-3p
hsa-miR-22-3p
hsa-miR-27b-3p
hsa-miR-302f
hsa-miR-337-3p
hsa-miR-377-3p
hsa-miR-380-3p
hsa-miR-452-5p
hsa-miR-485-5p
hsa-miR-497-5p
hsa-miR-513a-5p
hsa-miR-519b-3p
hsa-miR-519c-3p
hsa-miR-519d-3p
hsa-miR-543
hsa-miR-552-3p
hsa-miR-561-3p
hsa-miR-568
hsa-miR-579-3p
hsa-miR-580-3p
hsa-miR-584-5p
hsa-miR-629-5p
hsa-miR-636
hsa-miR-665
hsa-miR-93-5p
hsa-miR-125b-5p
hsa-miR-125a-5p

## Sheet: hsa-miR-142-5p
There are 7 cancer types where survival is significantly associated with hsa-miR-142-5p
miRNA Name	Cancer Abbreviation	Log Rank	Log Rank	Z-score	Upregulated in:	Deceased Log2	Living Log2	T-Test	T-Test
		P-value	FDR			Mean Expression	Mean Expression	P-value	FDR
hsa-miR-142-5p	CESC	0.00972	0.897	2.61	Living	6.77	7.08	0.0232	0.344
hsa-miR-142-5p	HNSC	0.0168	0.859	2.4	Living	6.9	7.06	0.119	0.469
hsa-miR-142-5p	KIRC	0.000167	0.0314	3.703	Deceased	6.42	5.94	0.000129	0.00358
hsa-miR-142-5p	LGG	9.68e-09	5.99e-05	5.835	Deceased	3.91	3.18	0.00174	0.0273
hsa-miR-142-5p	LUAD	0.0152	0.403	2.427	Living	6.88	6.99	0.481	0.701
hsa-miR-142-5p	SKCM	0.0118	0.459	2.59	Living	4.71	5.31	0.0399	0.823
hsa-miR-142-5p	UCEC	0.00171	0.625	3.197	Living	6	6.14	0.572	0.785
CESC: cervical squamous cell carcinoma and endocervical adenocarcinoma; HNSC: head and neck squamous cell carcinoma; KIRC: kidney renal clear cell carcinoma; LGG: brain lower grade glioma; LUAD: lung adenocarcinoma; SKCM: skin cutaneous melanoma; UCEC: uterine corpus endometrial carcinoma

## Sheet: hsa-miR-340-5p
There are 4 cancer types where survival is significantly associated with hsa-miR-340-5p
miRNA Name	Cancer Abbreviation	Log Rank	Log Rank	Z-score	Upregulated in:	Deceased Log2	Living Log2	T-Test	T-Test
		P-value	FDR			Mean Expression	Mean Expression	P-value	FDR
hsa-miR-340-5p	BRCA	0.0189	0.911	2.349	Deceased	4.51	4.13	0.125	0.695
hsa-miR-340-5p	LGG	0.0424	0.214	2.005	Deceased	5.42	5.27	0.147	0.384
hsa-miR-340-5p	PAAD	0.0101	0.519	2.542	Living	3.34	3.77	0.00257	0.11
hsa-miR-340-5p	THCA	2.31e-05	0.00329	3.68	Deceased	4.68	3.83	0.00109	0.0263
BRCA: breast invasive carcinoma; LGG: brain lower grade glioma; PAAD: pancreatic adenocarcinoma; THCA: thyroid carcinoma

## Sheet: hsa-miR-106b-5p
There are 8 cancer types where survival is significantly associated with hsa-miR-106b-5p
miRNA Name	Cancer Abbreviation	Log Rank	Log Rank	Z-score	Upregulated in:	Deceased Log2	Living Log2	T-Test	T-Test
		P-value	FDR			Mean Expression	Mean Expression	P-value	FDR
hsa-miR-106b-5p	ACC	0.00024	0.148	3.657	Deceased	7.46	6.63	0.00907	0.114
hsa-miR-106b-5p	KICH	0.0417	0.405	2.078	Deceased	7.2	6.57	0.114	0.573
hsa-miR-106b-5p	KIRC	2.7e-05	0.00743	4.151	Deceased	7.56	7.34	5.96e-05	0.00221
hsa-miR-106b-5p	LGG	4.65e-06	0.000439	4.62	Deceased	7.78	7.49	0.00415	0.0458
hsa-miR-106b-5p	LIHC	0.000884	0.305	3.363	Deceased	8.32	8.08	0.015	0.154
hsa-miR-106b-5p	PRAD	0.0129	0.133	2.536	Deceased	8.42	7.57	0.128	0.616
hsa-miR-106b-5p	SARC	0.00128	0.368	3.194	Deceased	7.65	7.4	0.0576	0.556
hsa-miR-106b-5p	THYM	0.0356	0.238	2.145	Living	8.81	9.29	0.167	0.399
ACC: adrenocortical carcinoma; KICH: kidney chromophobe; KIRC: kidney renal clear cell carcinoma; LGG: brain lower grade glioma; LIHC: liver hepatocellular carcinoma; PRAD: prostate adenocarcinoma; SARC: sarcoma; THYM: thymoma

## Sheet: hsa-miR-128-3p
There are 5 cancer types where survival is significantly associated with hsa-miR-128-3p
miRNA Name	Cancer Abbreviation	Log Rank	Log Rank	Z-score	Upregulated in:	Deceased Log2	Living Log2	T-Test	T-Test
		P-value	FDR			Mean Expression	Mean Expression	P-value	FDR
hsa-miR-128-3p	CESC	0.00663	0.864	2.676	Living	7.36	7.59	0.0523	0.509
hsa-miR-128-3p	LGG	1.51e-05	0.0119	4.303	Living	10.43	10.95	0.00227	0.0293
hsa-miR-128-3p	PAAD	0.000956	0.638	3.023	Living	6.6	7.16	0.0692	0.336
hsa-miR-128-3p	PRAD	0.0124	0.458	2.488	Deceased	7.01	6.55	0.308	0.616
hsa-miR-128-3p	THYM	0.00241	0.152	2.798	Living	9.64	11.84	1.14e-08	3.25e-07
CESC: cervical squamous cell carcinoma and endocervical adenocarcinoma; LGG: brain lower grade glioma; PAAD: pancreatic adenocarcinoma; PRAD: prostate adenocarcinoma; THYM: thymoma

## Sheet: hsa-miR-1284
There are 4 cancer types where survival is significantly associated with hsa-miR-1284
miRNA Name	Cancer Abbreviation	Log Rank	Log Rank	Z-score	Upregulated in:	Deceased Log2	Living Log2	T-Test	T-Test
		P-value	FDR			Mean Expression	Mean Expression	P-value	FDR
hsa-miR-1284	LIHC	0.0494	0.18	2.258	Deceased	0.14	0.05	0.125	0.449
hsa-miR-1284	STAD	0.0325	0.507	1.703	Living	0.01	0.04	0.0263	0.654
hsa-miR-1284	THYM	0.0372	0.182	0	Living	0	0.17	1.11e-05	0.000105
hsa-miR-1284	UCEC	0.00893	0.814	1.836	Living	0.02	0.1	0.000577	0.105
LIHC: liver hepatocellular carcinoma; STAD: stomach adenocarcinoma; THYM: thymoma; UCEC: uterine corpus endometrial carcinoma

## Sheet: hsa-miR-1297
There are 0 cancer types where survival is significantly associated with hsa-miR-1297

## Sheet: hsa-miR-1323
There are 6 cancer types where survival is significantly associated with hsa-miR-1323
miRNA Name	Cancer Abbreviation	Log Rank	Log Rank	Z-score	Upregulated in:	Deceased Log2	Living Log2	T-Test	T-Test
		P-value	FDR			Mean Expression	Mean Expression	P-value	FDR
hsa-miR-1323	HNSC	0.0396	0.208	2.739	Deceased	1.13	0.12	0.339	0.595
hsa-miR-1323	KICH	0.000756	0.308	3.685	Deceased	0.41	0	0.207	0.573
hsa-miR-1323	KIRP	0.0464	0.411	2.634	Deceased	0.61	0.11	0.317	0.594
hsa-miR-1323	MESO	0.035	0.982	2.881	Deceased	0.02	0	0.321	0.603
hsa-miR-1323	SARC	0.0113	0.368	3.397	Deceased	2.51	0.08	0.284	0.556
hsa-miR-1323	THYM	0.0256	0.147	1.78	Living	4.19	6.73	0.000584	0.00347
HNSC: head and neck squamous cell carcinoma; KICH: kidney chromophobe; KIRP: kidney renal papillary cell carcinoma; MESO: mesothelioma; SARC: sarcoma; THYM: thymoma

## Sheet: hsa-miR-135a-5p
There are 5 cancer types where survival is significantly associated with hsa-miR-135a-5p
miRNA Name	Cancer Abbreviation	Log Rank	Log Rank	Z-score	Upregulated in:	Deceased Log2	Living Log2	T-Test	T-Test
		P-value	FDR			Mean Expression	Mean Expression	P-value	FDR
hsa-miR-135a-5p	COAD	0.000387	0.703	4.63	Deceased	2.07	0.19	0.164	0.675
hsa-miR-135a-5p	PAAD	0.0101	0.767	2.429	Living	2.76	4.03	0.0875	0.372
hsa-miR-135a-5p	READ	0.026	0.93	1.622	Living	0.05	0.21	0.00543	0.607
hsa-miR-135a-5p	SKCM	0.0464	0.878	2.718	Living	0.01	0.02	0.636	0.9
hsa-miR-135a-5p	UCEC	0.0191	0.902	2.309	Living	4.46	4.76	0.442	0.686
COAD: colon adenocarcinoma; PAAD: pancreatic adenocarcinoma; READ: rectal adenocarcinoma; SKCM: skin cutaneous melanoma; UCEC: uterine corpus endometrial carcinoma

## Sheet: hsa-miR-135b-5p
There are 6 cancer types where survival is significantly associated with hsa-miR-135b-5p
miRNA Name	Cancer Abbreviation	Log Rank	Log Rank	Z-score	Upregulated in:	Deceased Log2	Living Log2	T-Test	T-Test
		P-value	FDR			Mean Expression	Mean Expression	P-value	FDR
hsa-miR-135b-5p	ACC	0.000417	0.156	4.313	Deceased	2.07	0.02	0.0252	0.196
hsa-miR-135b-5p	HNSC	0.0437	0.186	2.022	Living	5.62	5.87	0.352	0.605
hsa-miR-135b-5p	KIRC	1.38e-05	0.0132	4.303	Deceased	4.15	3.5	0.000285	0.00584
hsa-miR-135b-5p	LGG	3.49e-07	0.00611	5.88	Deceased	1.99	1.14	0.0764	0.277
hsa-miR-135b-5p	PAAD	0.0219	0.909	2.193	Living	5.92	5.94	0.944	0.967
hsa-miR-135b-5p	STAD	0.0435	0.474	2.045	Living	5.95	6.23	0.121	0.654
ACC: adrenocortical carcinoma; HNSC: head and neck squamous cell carcinoma; KIRC: kidney renal clear cell carcinoma; LGG: brain lower grade glioma; PAAD: pancreatic adenocarcinoma; STAD: stomach adenocarcinoma

[truncated: 44 more sheets: hsa-miR-146a-5p, hsa-miR-146b-5p, hsa-miR-15a-5p, hsa-miR-15b-5p, hsa-miR-16-5p, hsa-miR-17-5p, hsa-miR-19b-3p, hsa-miR-204-5p, hsa-miR-20a-5p, hsa-miR-20b-5p, hsa-miR-211-5p, hsa-miR-216a-5p, hsa-miR-218-5p, hsa-miR-219a-1-3p, hsa-miR-22-3p, hsa-miR-27b-3p, hsa-miR-302f, hsa-miR-337-3p, hsa-miR-377-3p, hsa-miR-380-3p …]
