# Supplementary material for: Molecular Mechanisms of PD-1 and PD-L1 Activity on a Pan-Cancer Basis: A Bioinformatic Exploratory Study
Source: Int J Mol Sci. 2021 May 22;22(11):5478. doi: 10.3390/ijms22115478 (PMC8196980; doi:10.3390/ijms22115478)
Supplement: Supplementary file 1 [file ijms-22-05478-s001.zip › Supplementary Figures.pdf]

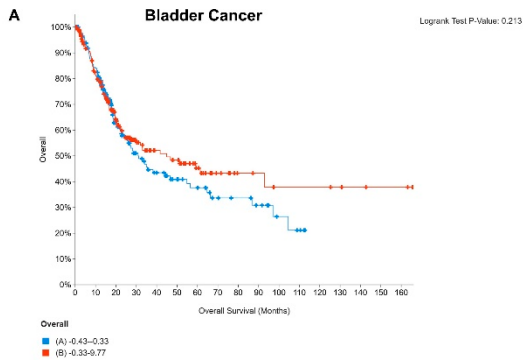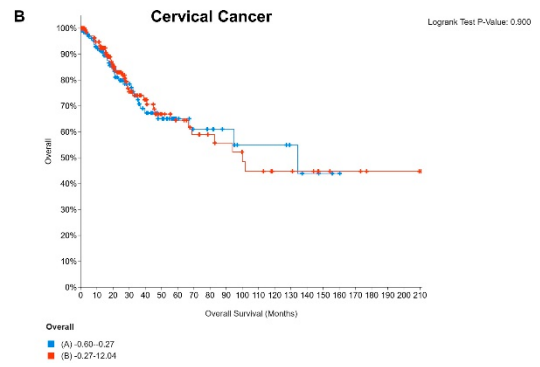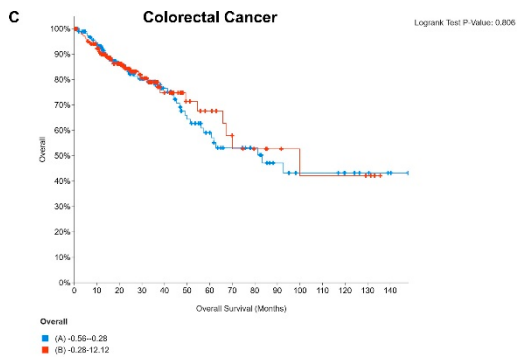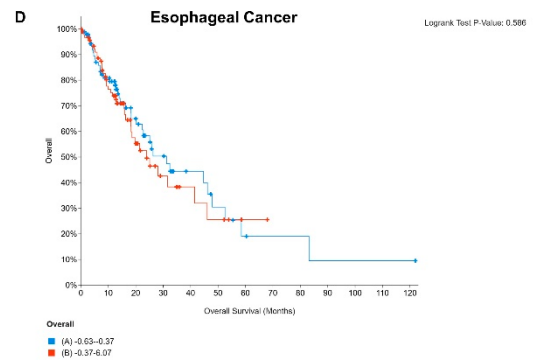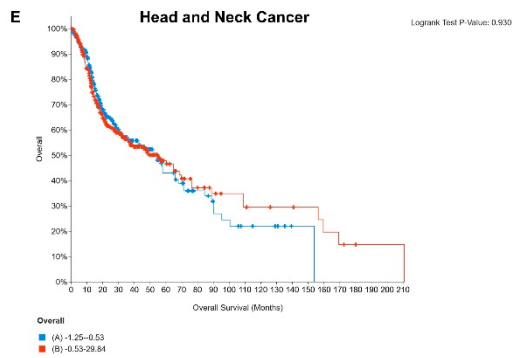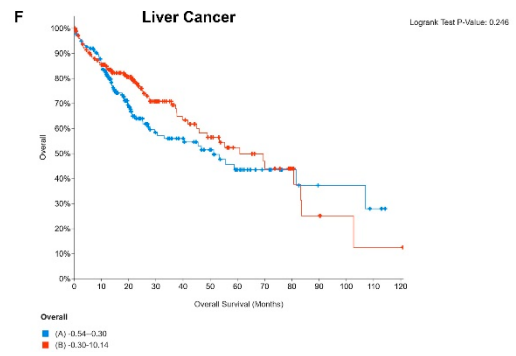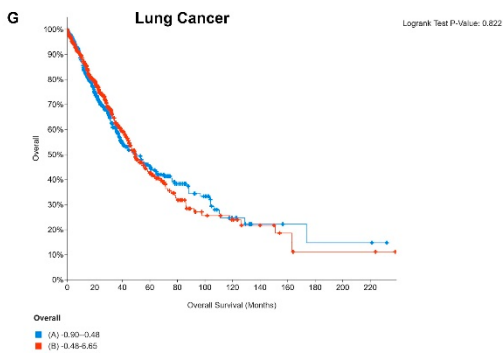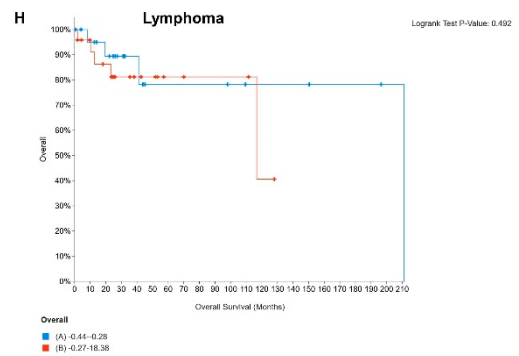

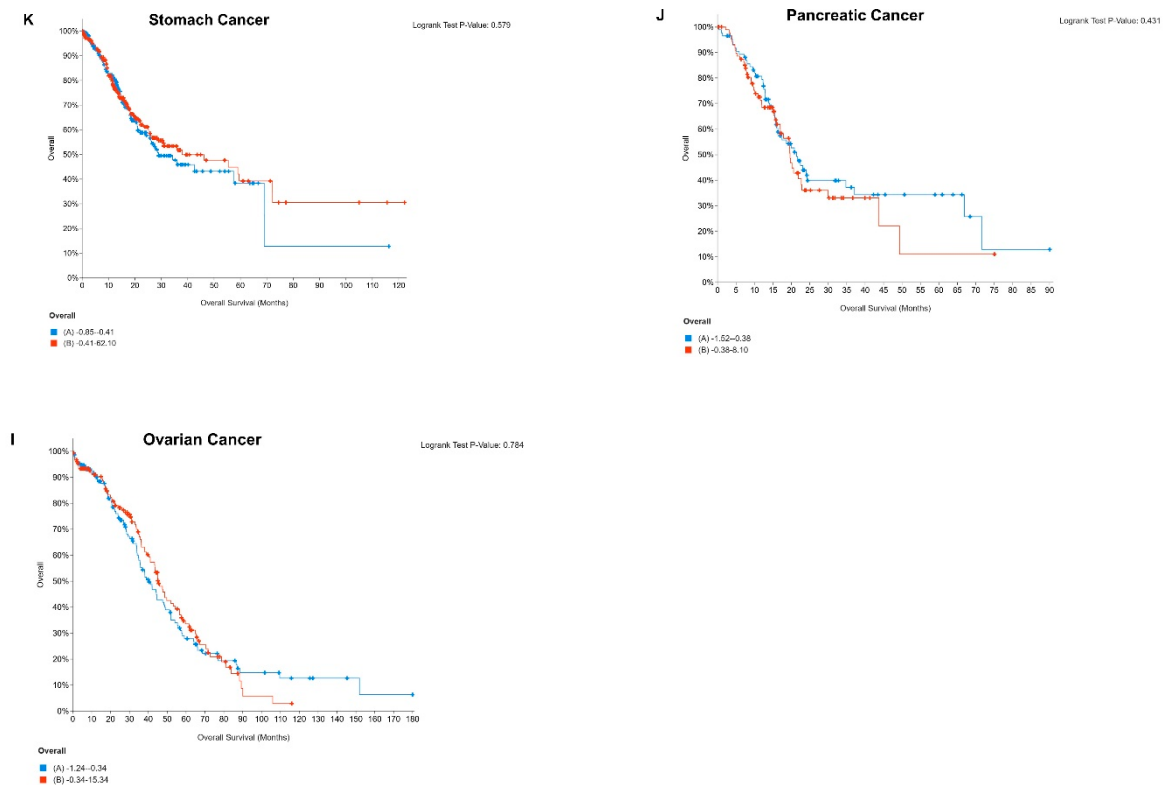

**Figure S1.** Non-significant Kaplan-Meier plots for CD274 expression pan-cancer. Data is shown for bladder cancer (A), cervical cancer (B), colorectal cancer (C), esophageal cancer (D), head and neck cancer (E), liver cancer (F), lung cancer (G), lymphoma (H), ovarian cancer (I), pancreatic cancer (J) and stomach cancer (K). In all cases, overall survival in months can be seen on the x-axis whilst percentage survived is shown on the y-axis. In all cases, high CD274 expression is shown in red whilst low CD274 expression is shown in blue. Data was generated using the mRNA expression z-scores relative to diploid samples (RNA Seq V2 RSEM) for the studies described in the Materials and Methods (Table 6). The mesothelioma study included (Mesothelioma (TCGA, Firehose Legacy)) lacked usable Kaplan-Meier survival data. Data for breast cancer, melanoma, and renal cancer produced significant results are shown in Figure 1.

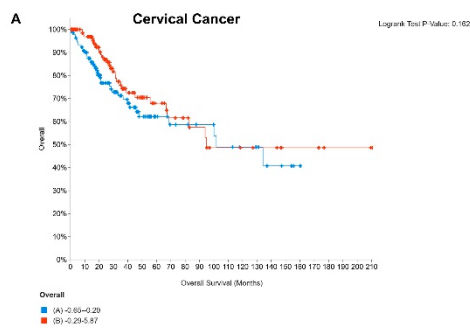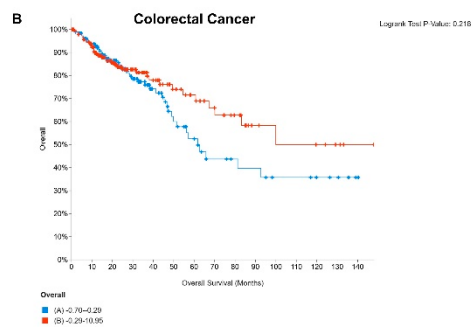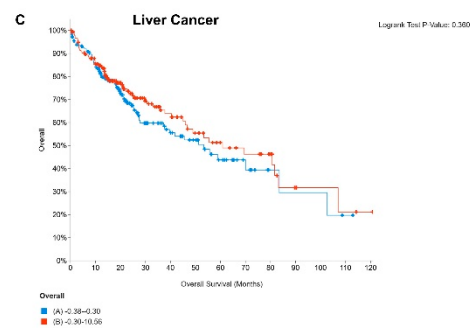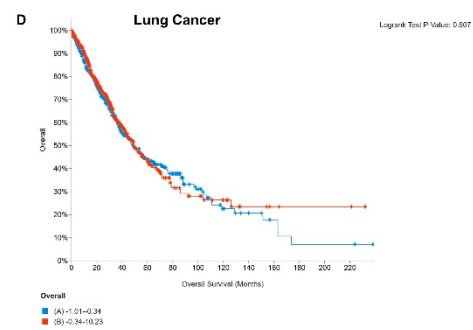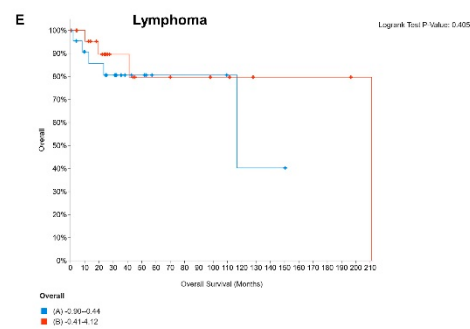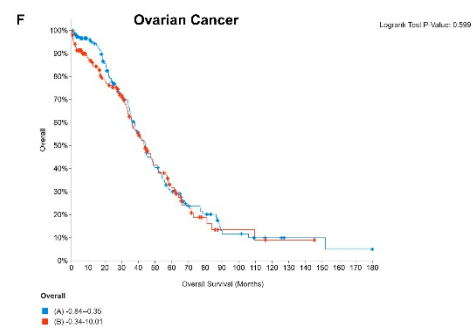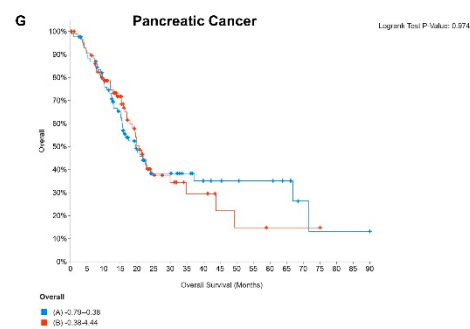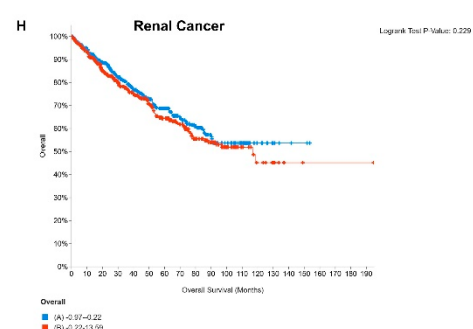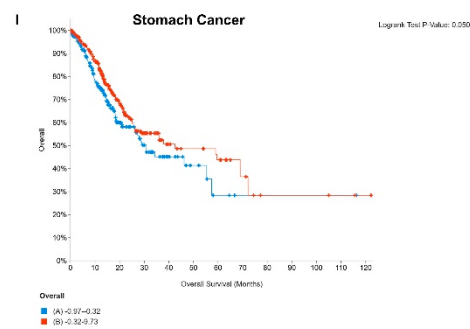

**Figure S2.** Non- significant Kaplan-Meier plots for PDCD1 expression pan-cancer. Data is shown for cervical cancer (A), colorectal cancer (B), liver cancer (C), lung cancer (D), lymphoma (E), ovarian cancer (F), pancreatic cancer (G), renal cancer (H) and stomach cancer (I). In all cases, overall survival in months can be seen on the x-axis whilst percentage survived is shown on the y-axis. In all cases, high PDCD1 expression is shown in red whilst low PDCD1 expression is shown in blue. Data was generated using the mRNA expression z-scores relative to diploid samples (RNA Seq V2 RSEM) for the studies described in the Materials and Methods (Table 6). The mesothelioma study included (Mesothelioma (TCGA, Firehose Legacy)) lacked usable Kaplan-Meier survival data. Data for breast cancer, esophageal cancer, head & neck cancer, and melanoma produced significant results are shown in Figure 2.
